# Supplementary material
Source: publisher site journal article supplement (https://www.dovepress.com/get_supplementary_file.php?f=508042.xlsx)
Supplement: Supplementary file 1 [file get_supplementary_file.php]

## Sheet: Table description
Tables	Description
Table S1.	Detailed information for genome-wide association studies involved in the present Mendelian Randomization study.
Table S2.	The instruments variables of circulating immune cells.
Table S3.	The instruments variables for plasma metabolites.
Table S4.	Causal associations between circulating immune cells and coronary atherosclerosis by using different method
Table S5.	Egger_intercept test for circulating immune cells in coronary atherosclerosis.
Table S6.	MR-PRESSO test for circulating immune cells in coronary atherosclerosis.
Table S7.	Cochran's Q test for circulating immune cells in coronary atherosclerosis.
Table S8.	Multivariable MR analysis betweencirculating immune cells and coronary atherosclerosis.
Table S9.	The causal effect of Coronary atherosclerosis on immunophenotypes
Table S10.	Causal associations between plasma metabolites and coronary atherosclerosis by using different method.
Table S11.	Egger_intercept test for plasma metabolites in coronary atherosclerosis.
Table S12.	MR-PRESSO test for plasma metabolites in coronary atherosclerosis.
Table S13.	Cochran's Q test for plasma metabolites in coronary atherosclerosis.
Table S14.	The causal effect of Coronary atherosclerosis on plasma metabolites.
Table S15.	Metabolite pathway enrichment analysis.

## Sheet: Table S1.
Table S1. Detailed information for genome-wide association studies involved in the present Mendelian Randomization study.
phenotype	Consortium	Ancestry	Sample size	Data Source
Immune cell	SardiNIA	European	3757	https://www.ebi.ac.uk/gwas/studies/GCST0001391-GCST0002121
Plasma metabolite	Canadian Longitudinal Study on Aging (CLSA) cohort. U	European	8299	https://www.ebi.ac.uk/gwas/studies/GCST90199621-90201020
Coronary atherosclerosis	FinnGen	European	23,363 cases and 187,840 controls	gs://finngen-public-data-r10/summary_stats/finngen_R10_I9_CORATHER.gz
Alcohol drinking	UK Biobank	European	232585	GCST90041820
Essential hypertension	UK Biobank	European	462,933	UKB-b-7582
Smoking behavior	UK Biobank	European	113384	GCST90043686

## Sheet: Table S2.
Table S2. The instruments of immune cell.
Exposure	SNP	Chrosome	Position	Effect_allele	Other_allele	Effect_allele_frequency	Beta	Standard_error	Samplesize	P_value	F_statistics
IgD+ B cell %B cell	rs72757888	1	233045963	T	C	0.01	0.5864	0.1201	3658	1.086e-06	23.8332
IgD+ B cell %B cell	rs56209800	2	238560295	T	A	0.0547	-0.2355	0.05263	3658	7.90806e-06	20.0169
IgD+ B cell %B cell	rs7597061	2	66001846	G	T	0.0998	0.1829	0.04129	3658	9.66696e-06	19.6164
IgD+ B cell %B cell	rs138919897	3	106834795	G	A	0.0019	1.402	0.2997	3658	2.986e-06	21.8778
IgD+ B cell %B cell	rs4691917	4	164344795	G	A	0.9956	0.9378	0.1877	3658	6.10394e-07	24.9559
IgD+ B cell %B cell	rs17405603	5	144608340	T	A	0.284	0.1542	0.02757	3658	2.38298e-08	31.2735
IgD+ B cell %B cell	rs72952600	6	114522609	G	C	0.0142	0.49	0.1045	3658	2.83302e-06	21.9807
IgD+ B cell %B cell	rs9265870	6	31312892	G	A	0.4718	0.1454	0.03049	3658	1.92398e-06	22.735
IgD+ B cell %B cell	rs12204136	6	91791081	C	T	0.0522	0.2426	0.05485	3658	9.99793e-06	19.5573
IgD+ B cell %B cell	rs10226722	7	68025695	C	T	0.6006	0.1184	0.0256	3658	3.83698e-06	21.3848
IgD+ B cell %B cell	rs2450220	8	119323401	T	C	0.816	-0.152	0.03167	3658	1.65299e-06	23.0289
IgD+ B cell %B cell	rs140191306	9	2570753	T	C	0.0179	0.4421	0.09364	3658	2.427e-06	22.2843
IgD+ B cell %B cell	rs11068290	12	110228055	T	C	0.0231	0.3904	0.08097	3658	1.486e-06	23.2409
IgD+ B cell %B cell	rs11616703	13	22879729	T	G	0.0171	-0.4199	0.09432	3658	8.75105e-06	19.8137
IgD+ B cell %B cell	rs62057183	16	30744826	T	C	0.2508	0.1273	0.02872	3658	9.63496e-06	19.6413
IgD+ B cell %B cell	rs73426855	17	77637123	C	T	0.1471	-0.174	0.03482	3658	6.07995e-07	24.9645
IgD+ B cell %B cell	rs148496020	17	51092001	A	T	0.0193	-0.4088	0.08921	3658	4.74799e-06	20.9931
IgD+ CD38+ B cell Absolute Count	rs1919856	1	247700906	G	A	0.108	0.1675	0.03766	3656	8.94499e-06	19.7765
IgD+ CD38+ B cell Absolute Count	rs116285595	1	200858159	T	C	0.0068	0.6503	0.1415	3656	4.44396e-06	21.1152
IgD+ CD38+ B cell Absolute Count	rs116104104	1	214476260	T	C	0.0004	5.387	1.184	3656	5.50503e-06	20.6953
IgD+ CD38+ B cell Absolute Count	rs12036556	1	99149370	T	C	0.0265	0.3487	0.07421	3656	2.714e-06	22.0729
IgD+ CD38+ B cell Absolute Count	rs1294253	1	233503875	C	T	0.7254	-0.1382	0.02658	3656	2.1e-07	27.0263
IgD+ CD38+ B cell Absolute Count	rs146959444	1	167027268	C	T	0.0023	1.249	0.2574	3656	1.287e-06	23.5391
IgD+ CD38+ B cell Absolute Count	rs113965271	2	128428350	C	G	0.0286	-0.3262	0.07211	3656	6.28507e-06	20.4578
IgD+ CD38+ B cell Absolute Count	rs733555	2	16464227	T	G	0.2637	-0.1396	0.02714	3656	2.85299e-07	26.4504
IgD+ CD38+ B cell Absolute Count	rs78188887	2	155636739	G	A	0.0014	1.533	0.3206	3656	1.80198e-06	22.858
IgD+ CD38+ B cell Absolute Count	rs140380950	2	105587803	C	T	0.0368	-0.3568	0.06296	3656	1.567e-08	32.1071
IgD+ CD38+ B cell Absolute Count	rs374727947	3	163801921	G	T	0.0098	0.6111	0.1307	3656	3.02197e-06	21.8552
IgD+ CD38+ B cell Absolute Count	rs794185	3	4437358	C	T	0.3362	-0.1116	0.02511	3656	9.05899e-06	19.7477
IgD+ CD38+ B cell Absolute Count	rs76112278	4	15915069	A	G	0.0194	-0.4579	0.08605	3656	1.09099e-07	28.3088
IgD+ CD38+ B cell Absolute Count	rs7667070	4	38379833	C	T	0.0361	-0.2956	0.06254	3656	2.36298e-06	22.3344
IgD+ CD38+ B cell Absolute Count	rs80330977	5	158276610	A	G	0.0814	-0.2576	0.04422	3656	6.158e-09	33.9262
IgD+ CD38+ B cell Absolute Count	rs78658073	5	498773	A	G	0.001	1.665	0.362	3656	4.385e-06	21.1491
IgD+ CD38+ B cell Absolute Count	rs76660971	5	18919526	A	G	0.2299	-0.1264	0.02828	3656	8.14798e-06	19.9718
IgD+ CD38+ B cell Absolute Count	rs117772462	7	48791017	A	T	0.0159	-0.4238	0.09514	3656	8.67401e-06	19.837
IgD+ CD38+ B cell Absolute Count	rs10265656	7	187171	G	A	0.9375	-0.2229	0.04923	3656	6.15106e-06	20.4947
IgD+ CD38+ B cell Absolute Count	rs143397127	7	12847391	C	T	0.0157	-0.4626	0.09576	3656	1.41599e-06	23.3305
IgD+ CD38+ B cell Absolute Count	rs1695681	8	118255950	A	C	0.5309	-0.1256	0.02413	3656	2.05698e-07	27.0861
IgD+ CD38+ B cell Absolute Count	rs16868356	8	102770464	C	T	0.0198	0.4146	0.08532	3656	1.226e-06	23.6069
IgD+ CD38+ B cell Absolute Count	rs2395904	8	130617819	G	T	0.2657	-0.1279	0.02666	3656	1.69001e-06	23.0092
IgD+ CD38+ B cell Absolute Count	rs10821937	10	63723909	T	C	0.6458	-0.1118	0.02511	3656	8.81089e-06	19.8185
IgD+ CD38+ B cell Absolute Count	rs61878035	11	15328898	A	G	0.1886	0.1453	0.03068	3656	2.24202e-06	22.4234
IgD+ CD38+ B cell Absolute Count	rs11068290	12	110228055	T	C	0.0231	0.3555	0.07815	3656	5.55098e-06	20.6872
IgD+ CD38+ B cell Absolute Count	rs118090735	12	78790468	G	T	0.0011	1.518	0.3399	3656	8.22602e-06	19.9399
IgD+ CD38+ B cell Absolute Count	rs11159480	14	81466662	T	G	0.8166	-0.1526	0.0323	3656	2.399e-06	22.3144
IgD+ CD38+ B cell Absolute Count	rs7169431	15	56340896	G	A	0.9219	-0.2007	0.04408	3656	5.45896e-06	20.7249
IgD+ CD38+ B cell Absolute Count	rs76608654	16	55450479	C	T	0.0494	0.2489	0.05423	3656	4.56405e-06	21.0597
IgD+ CD38+ B cell Absolute Count	rs12939565	17	38038389	T	A	0.4267	-0.1364	0.02672	3656	3.47496e-07	26.0518
IgD+ CD38dim B cell %B cell	rs75766272	1	8009985	T	C	0.0201	0.3861	0.08587	3657	7.14299e-06	20.2115
IgD+ CD38dim B cell %B cell	rs7595353	2	229232050	C	T	0.3054	-0.1211	0.02671	3657	6.02005e-06	20.5505
IgD+ CD38dim B cell %B cell	rs9865821	3	7014131	A	C	0.6459	0.115	0.02558	3657	7.16193e-06	20.2058
IgD+ CD38dim B cell %B cell	rs6835759	4	170328209	G	A	0.4701	0.1189	0.02486	3657	1.79498e-06	22.8688
IgD+ CD38dim B cell %B cell	rs2301101	5	83420407	G	T	0.1097	-0.187	0.03994	3657	2.93501e-06	21.9153
IgD+ CD38dim B cell %B cell	rs9459562	6	166502048	C	G	0.4346	0.1101	0.02478	3657	9.1791e-06	19.7357
IgD+ CD38dim B cell %B cell	rs6998850	8	61848028	G	A	0.3018	0.1204	0.02683	3657	7.45899e-06	20.1323
IgD+ CD38dim B cell %B cell	rs546147740	8	4318676	C	T	0.0051	0.763	0.1665	3657	4.75499e-06	20.9943
IgD+ CD38dim B cell %B cell	rs62488766	8	12518295	G	A	0.0283	-0.3635	0.08066	3657	6.80205e-06	20.3036
IgD+ CD38dim B cell %B cell	rs61912200	12	1637126	A	T	0.0022	1.216	0.2655	3657	4.81903e-06	20.971
IgD+ CD38dim B cell %B cell	rs78269238	14	65673804	T	C	0.0582	-0.2771	0.05349	3657	2.34498e-07	26.8293
IgD+ CD38dim B cell %B cell	rs60521331	17	8639905	A	G	0.5022	0.1107	0.02463	3657	7.24202e-06	20.1952
IgD+ CD38dim B cell %B cell	rs34157595	17	49200947	C	T	0.3154	0.1327	0.02673	3657	7.23303e-07	24.6391
IgD+ CD38dim B cell %B cell	rs329966	19	53070617	G	A	0.5425	-0.1265	0.02461	3657	2.90402e-07	26.4143
IgD+ CD38dim B cell %B cell	rs4811007	20	48839604	G	A	0.4837	0.1261	0.02461	3657	3.12702e-07	26.2475
IgD+ CD38dim B cell %B cell	rs73909843	20	49554764	C	T	0.0764	0.2092	0.0466	3657	7.39095e-06	20.148
IgD+ CD38dim B cell %B cell	rs78958229	21	39363957	T	C	0.044	0.2934	0.0591	3657	7.21705e-07	24.6392
IgD+ CD38dim B cell Absolute Count	rs72691696	1	166598682	T	C	0.0014	1.476	0.332	3656	9.04899e-06	19.7596
IgD+ CD38dim B cell Absolute Count	rs7690529	4	91412392	G	A	0.0115	0.5256	0.1173	3656	7.71898e-06	20.0722
IgD+ CD38dim B cell Absolute Count	rs147207149	5	128786753	G	A	0.0075	0.6732	0.1407	3656	1.78398e-06	22.8866
IgD+ CD38dim B cell Absolute Count	rs17056318	5	158285953	C	T	0.081	-0.2225	0.04431	3656	5.37403e-07	25.208
IgD+ CD38dim B cell Absolute Count	rs1510970	5	118216738	A	G	0.087	-0.1966	0.04234	3656	3.57001e-06	21.5549
IgD+ CD38dim B cell Absolute Count	rs115150472	5	146138788	T	C	0.0004	2.534	0.5718	3656	9.63008e-06	19.6339
IgD+ CD38dim B cell Absolute Count	rs141880653	5	166970737	T	C	0.001	1.849	0.3979	3656	3.49004e-06	21.5877
IgD+ CD38dim B cell Absolute Count	rs115951641	6	52336715	T	A	0.049	0.2476	0.05577	3656	9.24996e-06	19.7052
IgD+ CD38dim B cell Absolute Count	rs12197153	6	100821460	A	G	0.0007	2.216	0.4431	3656	5.95895e-07	25.0044
IgD+ CD38dim B cell Absolute Count	rs143397127	7	12847391	C	T	0.0157	-0.4549	0.09626	3656	2.37602e-06	22.3265
IgD+ CD38dim B cell Absolute Count	rs190448231	7	87868543	G	T	0.028	0.327	0.07351	3656	8.89406e-06	19.7826
IgD+ CD38dim B cell Absolute Count	rs2395904	8	130617819	G	T	0.2657	-0.1253	0.0268	3656	3.02503e-06	21.8531
IgD+ CD38dim B cell Absolute Count	rs283340	8	70193536	C	T	0.5621	0.1175	0.02409	3656	1.128e-06	23.7839
IgD+ CD38dim B cell Absolute Count	rs150663332	8	2044843	T	C	0.084	-0.1942	0.0428	3656	5.88098e-06	20.5822
IgD+ CD38dim B cell Absolute Count	rs139801247	9	138747854	C	T	0.0208	0.3801	0.0836	3656	5.63002e-06	20.6664
IgD+ CD38dim B cell Absolute Count	rs116851238	10	33792014	T	C	0.0176	-0.4319	0.08996	3656	1.64399e-06	23.0435
IgD+ CD38dim B cell Absolute Count	rs12799241	11	119980729	A	G	0.2619	0.13	0.0273	3656	1.99301e-06	22.6695
IgD+ CD38dim B cell Absolute Count	rs75474045	13	72428296	A	G	0.0126	0.5528	0.1063	3656	2.08502e-07	27.0365
IgD+ CD38dim B cell Absolute Count	rs12906621	15	37177413	A	G	0.1091	0.1764	0.03817	3656	3.91102e-06	21.3518
IgD+ CD38dim B cell Absolute Count	rs117518951	16	55449193	C	T	0.049	0.2458	0.0546	3656	6.92708e-06	20.2609
IgD+ CD38dim B cell Absolute Count	rs143176410	16	84305239	C	G	0.001	1.912	0.3929	3656	1.185e-06	23.6752
IgD+ CD38dim B cell Absolute Count	rs8076302	17	79265701	T	C	0.185	-0.1385	0.03056	3656	6.00703e-06	20.534
IgD+ CD38dim B cell Absolute Count	rs12939566	17	38038390	T	A	0.4148	-0.1486	0.02725	3656	5.30603e-08	29.7294
IgD+ CD38dim B cell Absolute Count	rs4792571	17	14931234	T	G	0.4699	0.1093	0.02377	3656	4.41804e-06	21.138
IgD+ CD38dim B cell Absolute Count	rs655580	19	53039110	A	G	0.4571	0.1183	0.0239	3656	7.70495e-07	24.4937
IgD+ CD38dim B cell Absolute Count	rs34764986	20	59926554	C	T	0.0699	-0.2175	0.04671	3656	3.31497e-06	21.676
IgD+ CD38- B cell %B cell	rs12122084	1	111914431	A	G	0.1916	-0.1408	0.03104	3657	5.93895e-06	20.5704
IgD+ CD38- B cell %B cell	rs1512044	3	188624425	A	G	0.1084	0.202	0.03882	3657	2.07e-07	27.069
IgD+ CD38- B cell %B cell	rs76376526	4	109408667	T	C	0.0133	0.4948	0.1101	3657	7.20593e-06	20.1914
IgD+ CD38- B cell %B cell	rs78009119	5	136421498	G	T	0.0137	-0.4914	0.1063	3657	3.88401e-06	21.3641
IgD+ CD38- B cell %B cell	rs34843244	5	90267368	T	A	0.033	0.308	0.06835	3657	6.80597e-06	20.3004
IgD+ CD38- B cell %B cell	rs115802369	6	5380890	G	A	0.0175	-0.4129	0.0922	3657	7.76497e-06	20.0498
IgD+ CD38- B cell %B cell	rs2621369	6	32768285	T	C	0.2901	0.1498	0.03155	3657	2.13098e-06	22.5375
IgD+ CD38- B cell %B cell	rs113398446	6	161871755	C	A	0.1687	0.1793	0.03256	3657	3.91201e-08	30.3161
IgD+ CD38- B cell %B cell	rs80032720	6	32384933	A	G	0.0734	0.2539	0.05434	3657	3.08901e-06	21.8257
IgD+ CD38- B cell %B cell	rs10254361	7	119564205	T	G	0.2404	0.1333	0.02899	3657	4.40099e-06	21.1371
IgD+ CD38- B cell %B cell	rs2251199	8	14671281	G	A	0.628	0.1168	0.02572	3657	5.73799e-06	20.617
IgD+ CD38- B cell %B cell	rs62502412	8	28265475	T	A	0.2759	0.1209	0.02712	3657	8.58401e-06	19.868
IgD+ CD38- B cell %B cell	rs10111625	8	79595404	G	A	0.5384	-0.1169	0.02611	3657	7.72094e-06	20.0399
IgD+ CD38- B cell %B cell	rs7012048	8	29631839	C	T	0.1874	0.1407	0.0311	3657	6.25403e-06	20.462
IgD+ CD38- B cell %B cell	rs148952274	9	37982527	T	C	0.0004	-2.911	0.6469	3657	7.01003e-06	20.2438
IgD+ CD38- B cell %B cell	rs79870102	12	66341509	G	A	0.0033	0.9733	0.216	3657	6.83502e-06	20.2986
IgD+ CD38- B cell %B cell	rs1959342	14	20673865	T	A	0.3589	0.112	0.02529	3657	9.81002e-06	19.6074
IgD+ CD38- B cell %B cell	rs77762131	14	96205838	C	G	0.045	0.3388	0.05748	3657	4.101e-09	34.7324
IgD+ CD38- B cell %B cell	rs10444793	15	44517689	A	G	0.018	-0.4608	0.09102	3657	4.34901e-07	25.6231
IgD+ CD38- B cell %B cell	rs147135384	15	40195637	C	T	0.0004	-2.756	0.6192	3657	8.78294e-06	19.8051
IgD+ CD38- B cell %B cell	rs11150426	16	81986583	C	G	0.5386	-0.1169	0.02444	3657	1.78098e-06	22.8722
IgD+ CD38- B cell %B cell	rs181771926	16	52294553	A	G	0.0126	-0.5276	0.1101	3657	1.73002e-06	22.9571
IgD+ CD38- B cell %B cell	rs329966	19	53070617	G	A	0.5425	0.1246	0.02445	3657	3.62702e-07	25.9633
IgD+ CD38- B cell %B cell	rs73909843	20	49554764	C	T	0.0764	-0.2138	0.04629	3657	4.00904e-06	21.3266
IgD+ CD38- B cell %B cell	rs35050775	20	8003880	T	G	0.0268	0.3463	0.07724	3657	7.53894e-06	20.0956
IgD+ CD38- B cell Absolute Count	rs10493766	1	85945660	G	A	0.233	-0.1336	0.02933	3656	5.433e-06	20.7429
IgD+ CD38- B cell Absolute Count	rs149701635	3	44741083	G	C	0.0263	-0.3526	0.07768	3656	5.84804e-06	20.5981
IgD+ CD38- B cell Absolute Count	rs79207264	3	96406408	A	G	0.1184	0.1854	0.03946	3656	2.73602e-06	22.0692
IgD+ CD38- B cell Absolute Count	rs71615254	4	178658413	C	A	0.0406	-0.278	0.0622	3656	8.085e-06	19.9705
IgD+ CD38- B cell Absolute Count	rs146127735	5	502938	A	G	0.0383	0.3025	0.06424	3656	2.59298e-06	22.1677
IgD+ CD38- B cell Absolute Count	rs1158784	6	32758761	T	A	0.1554	0.174	0.03801	3656	4.88405e-06	20.95
IgD+ CD38- B cell Absolute Count	rs12216018	6	130514590	T	C	0.1415	-0.1686	0.03603	3656	2.988e-06	21.8911
IgD+ CD38- B cell Absolute Count	rs7809268	7	96302607	C	T	0.0687	-0.2247	0.04918	3656	5.07201e-06	20.8694
IgD+ CD38- B cell Absolute Count	rs144625305	7	7871676	T	C	0.0086	0.6074	0.1364	3656	8.70001e-06	19.8245
IgD+ CD38- B cell Absolute Count	rs10866982	8	5127400	A	G	0.4751	-0.1114	0.02467	3656	6.49307e-06	20.3851
IgD+ CD38- B cell Absolute Count	rs12763172	10	85447519	C	T	0.7213	0.1258	0.02784	3656	6.38499e-06	20.4129
IgD+ CD38- B cell Absolute Count	rs7909504	10	32174610	A	G	0.1358	-0.165	0.03707	3656	8.79103e-06	19.8063
IgD+ CD38- B cell Absolute Count	rs146687492	11	125619694	T	G	0.0291	-0.3372	0.07361	3656	4.76903e-06	20.9789
IgD+ CD38- B cell Absolute Count	rs12874404	13	108993494	G	A	0.3256	0.1363	0.02669	3656	3.41602e-07	26.0721
IgD+ CD38- B cell Absolute Count	rs77762131	14	96205838	C	G	0.045	0.3229	0.05806	3656	2.85299e-08	30.9217
IgD+ CD38- B cell Absolute Count	rs10444793	15	44517689	A	G	0.0181	-0.4107	0.09229	3656	8.83792e-06	19.798
IgD+ CD38- B cell Absolute Count	rs1529727	19	11164067	G	T	0.5581	0.1176	0.02521	3656	3.20701e-06	21.7546
IgD+ CD38- B cell Absolute Count	rs62235484	21	41083050	A	G	0.0175	0.4628	0.09388	3656	8.58005e-07	24.2953
Unswitched memory B cell %B cell	rs7412746	1	150860471	T	C	0.5153	-0.1152	0.02573	3657	7.80998e-06	20.0404
Unswitched memory B cell %B cell	rs146430312	1	236060214	T	G	0.0027	1.017	0.2222	3657	4.87203e-06	20.9428
Unswitched memory B cell %B cell	rs75766272	1	8009985	T	C	0.0201	-0.4409	0.08695	3657	4.15002e-07	25.7053
Unswitched memory B cell %B cell	rs72686460	1	45867753	A	T	0.2961	0.1254	0.02755	3657	5.44804e-06	20.7125
Unswitched memory B cell %B cell	rs77201712	2	157311822	C	T	0.0392	0.2907	0.06322	3657	4.38995e-06	21.1379
Unswitched memory B cell %B cell	rs17006489	2	28304630	G	A	0.1354	-0.1728	0.03779	3657	4.976e-06	20.9033
Unswitched memory B cell %B cell	rs72844588	2	138420154	A	G	0.0913	0.2054	0.04341	3657	2.31398e-06	22.3822
Unswitched memory B cell %B cell	rs45608038	2	73679013	G	A	0.0421	0.294	0.06266	3657	2.80698e-06	22.0087
Unswitched memory B cell %B cell	rs73041424	3	16414269	G	A	0.0488	-0.2606	0.05834	3657	8.18502e-06	19.9479
Unswitched memory B cell %B cell	rs183471524	4	27108645	G	A	0.0905	-0.1978	0.04411	3657	7.52905e-06	20.1029
Unswitched memory B cell %B cell	rs116525939	5	97611924	C	T	0.0036	0.9467	0.2075	3657	5.22998e-06	20.8099
Unswitched memory B cell %B cell	rs895377	5	58050530	A	G	0.3683	-0.1186	0.02612	3657	5.77604e-06	20.6112
Unswitched memory B cell %B cell	rs73032183	6	169456830	C	T	0.1509	0.1675	0.03506	3657	1.852e-06	22.8185
Unswitched memory B cell %B cell	rs4710879	6	170426027	T	C	0.5621	-0.1204	0.0253	3657	2.03301e-06	22.6409
Unswitched memory B cell %B cell	rs12539793	7	25971860	T	C	0.0115	-0.5404	0.1145	3657	2.47002e-06	22.269
Unswitched memory B cell %B cell	rs11779181	8	9063027	T	C	0.4003	-0.1402	0.03143	3657	8.41008e-06	19.8925
Unswitched memory B cell %B cell	rs1679013	9	22206987	T	C	0.5945	-0.1252	0.02555	3657	9.97103e-07	24.0054
Unswitched memory B cell %B cell	rs1930922	9	93297086	G	A	0.2419	-0.137	0.0295	3657	3.54797e-06	21.5615
Unswitched memory B cell %B cell	rs12380223	9	7639660	A	T	0.0096	-0.5815	0.128	3657	5.76196e-06	20.6329
Unswitched memory B cell %B cell	rs143553941	12	109368119	C	G	0.013	0.5187	0.1092	3657	2.093e-06	22.5563
Unswitched memory B cell %B cell	rs11519226	12	20322449	T	A	0.299	0.1229	0.02717	3657	6.23706e-06	20.4553
Unswitched memory B cell %B cell	rs7322292	13	51370899	T	C	0.3275	-0.1256	0.02669	3657	2.61403e-06	22.1393
Unswitched memory B cell %B cell	rs73192651	13	50212885	T	C	0.02	0.5551	0.08989	3657	7.31493e-10	38.1242
Unswitched memory B cell %B cell	rs2793491	13	24826051	T	C	0.2052	-0.1335	0.02997	3657	8.71806e-06	19.8367
Unswitched memory B cell %B cell	rs73518104	13	70177578	A	G	0.0708	0.2174	0.04847	3657	7.48204e-06	20.112
Unswitched memory B cell %B cell	rs117004076	14	97702226	G	A	0.0146	0.4523	0.102	3657	9.52708e-06	19.6578
Unswitched memory B cell %B cell	rs77762131	14	96205838	C	G	0.045	0.3067	0.05822	3657	1.457e-07	27.7437
Unswitched memory B cell %B cell	rs143666202	14	77579227	A	G	0.0503	0.2759	0.0579	3657	1.957e-06	22.7001
Unswitched memory B cell %B cell	rs150839591	17	260039	G	T	0.0552	0.2459	0.05396	3657	5.33998e-06	20.7613
Unswitched memory B cell %B cell	rs1596383	18	7993103	A	G	0.6259	0.1208	0.02585	3657	3.06302e-06	21.832
Unswitched memory B cell %B cell	rs1883832	20	44746982	C	T	0.6318	-0.1236	0.02682	3657	4.23701e-06	21.2325
Unswitched memory B cell %B cell	rs138380722	20	56790125	A	G	0.0007	-1.906	0.4167	3657	4.94197e-06	20.9161
Unswitched memory B cell %B cell	rs146720368	22	32003463	T	C	0.0042	0.852	0.1923	3657	9.65895e-06	19.6246
Unswitched memory B cell Absolute Count	rs75766272	1	8009985	T	C	0.0201	-0.3814	0.08558	3656	8.57808e-06	19.8563
Unswitched memory B cell Absolute Count	rs11737576	4	55923201	T	C	0.0584	-0.2347	0.05231	3656	7.42506e-06	20.1251
Unswitched memory B cell Absolute Count	rs79831025	6	40981212	G	C	0.0334	0.3026	0.06778	3656	8.29392e-06	19.9258
Unswitched memory B cell Absolute Count	rs4076316	6	167859623	A	T	0.3005	-0.1331	0.02714	3656	9.72904e-07	24.0446
Unswitched memory B cell Absolute Count	rs144625305	7	7871676	T	C	0.0086	0.5999	0.1347	3656	8.69901e-06	19.8291
Unswitched memory B cell Absolute Count	rs2436878	8	103767171	G	A	0.077	0.2056	0.04549	3656	6.40693e-06	20.4219
Unswitched memory B cell Absolute Count	rs118092259	8	89432719	G	T	0.0414	-0.2912	0.06306	3656	4.00101e-06	21.3185
Unswitched memory B cell Absolute Count	rs11794578	9	808529	G	T	0.4521	0.1114	0.02446	3656	5.41701e-06	20.7367
Unswitched memory B cell Absolute Count	rs112839090	12	119727983	A	G	0.1972	-0.1468	0.03096	3656	2.18902e-06	22.4766
Unswitched memory B cell Absolute Count	rs12874404	13	108993494	G	A	0.3256	0.1523	0.02639	3656	8.62303e-09	33.2968
Unswitched memory B cell Absolute Count	rs557577736	13	46224092	G	A	0.001	1.924	0.3849	3656	6.08793e-07	24.9802
Unswitched memory B cell Absolute Count	rs145371905	13	70325772	T	G	0.0194	0.4126	0.08871	3656	3.42997e-06	21.6269
Unswitched memory B cell Absolute Count	rs73192651	13	50212885	T	C	0.02	0.4968	0.08845	3656	2.09402e-08	31.5391
Unswitched memory B cell Absolute Count	rs77762131	14	96205838	C	G	0.045	0.3067	0.05723	3656	8.86605e-08	28.7119
Unswitched memory B cell Absolute Count	rs143666202	14	77579227	A	G	0.0502	0.268	0.05703	3656	2.711e-06	22.0772
Unswitched memory B cell Absolute Count	rs8014978	14	94936964	C	T	0.5737	-0.123	0.02471	3656	6.71104e-07	24.7711
Unswitched memory B cell Absolute Count	rs880311	16	8963504	T	C	0.1034	-0.1813	0.04019	3656	6.62995e-06	20.3442
Unswitched memory B cell Absolute Count	rs11657118	17	2714118	C	T	0.475	-0.1112	0.02412	3656	4.20998e-06	21.2489
Unswitched memory B cell Absolute Count	rs12461001	19	14885525	A	G	0.6291	0.1184	0.02528	3656	2.94802e-06	21.9296
Unswitched memory B cell Absolute Count	rs7254039	19	14993354	A	G	0.0435	-0.2602	0.05799	3656	7.42506e-06	20.1275
Unswitched memory B cell Absolute Count	rs6032660	20	44730245	A	G	0.6359	-0.1345	0.02641	3656	3.65797e-07	25.9292
Unswitched memory B cell Absolute Count	rs55712190	22	22613458	T	C	0.074	0.214	0.04712	3656	5.75798e-06	20.6205
IgD- CD27- B cell %B cell	rs76625665	1	233049739	T	G	0.0068	-0.6497	0.144	3657	6.61302e-06	20.3508
IgD- CD27- B cell %B cell	rs116473015	2	147859010	T	C	0.029	0.3455	0.07401	3657	3.14101e-06	21.787
IgD- CD27- B cell %B cell	rs9842571	3	125931267	A	G	0.554	-0.1134	0.02519	3657	6.97108e-06	20.2605
IgD- CD27- B cell %B cell	rs35574803	3	32533246	C	T	0.0562	-0.3526	0.05371	3657	5.92243e-11	43.0859
IgD- CD27- B cell %B cell	rs79430021	4	25037515	A	G	0.006	0.7602	0.1642	3657	3.80697e-06	21.4284
IgD- CD27- B cell %B cell	rs35661323	7	44284783	T	C	0.5505	0.1158	0.02527	3657	4.73097e-06	20.9936
IgD- CD27- B cell %B cell	rs2250246	12	6553016	G	A	0.5339	0.1466	0.02442	3657	2.12501e-09	36.0295
IgD- CD27- B cell %B cell	rs7224129	17	38075426	A	G	0.4751	-0.1297	0.02756	3657	2.61e-06	22.1413
IgD- CD27- B cell %B cell	rs11658240	17	80484139	G	A	0.1362	-0.1678	0.03574	3657	2.76599e-06	22.0372
IgD- CD27- B cell %B cell	rs7209088	17	8030165	G	C	0.2786	-0.12	0.02705	3657	9.40503e-06	19.6747
IgD- CD27- B cell %B cell	rs72897237	18	37553257	C	T	0.0161	0.4671	0.09743	3657	1.69699e-06	22.9782
IgD- CD27- B cell %B cell	rs645554	19	14389948	A	G	0.2811	-0.1226	0.02695	3657	5.52205e-06	20.6892
IgD- CD27- B cell %B cell	rs4810485	20	44747947	G	T	0.6314	0.3898	0.02585	3657	7.1978e-50	227.323
IgD- CD27- B cell %B cell	rs6073079	20	42024537	A	G	0.12	0.1776	0.03746	3657	2.21299e-06	22.4715
IgD- CD27- B cell %B cell	rs11086984	20	44511627	T	C	0.1514	-0.1811	0.03498	3657	2.36799e-07	26.7965
IgD- CD27- B cell %B cell	rs62223906	21	38699025	T	C	0.0649	0.2217	0.0497	3657	8.39093e-06	19.893
IgD+ B cell Absolute Count	rs71615254	4	178658413	C	A	0.0406	-0.3043	0.06135	3657	7.40406e-07	24.5955
IgD+ B cell Absolute Count	rs12197153	6	100821460	A	G	0.0007	2.08	0.4491	3657	3.74498e-06	21.4448
IgD+ B cell Absolute Count	rs9354413	6	67039330	C	T	0.2963	0.1254	0.02726	3657	4.385e-06	21.1556
IgD+ B cell Absolute Count	rs2390504	7	21321670	A	G	0.0485	-0.2583	0.05708	3657	6.222e-06	20.4721
IgD+ B cell Absolute Count	rs146233710	7	106139682	G	C	0.0221	-0.3853	0.08481	3657	5.72704e-06	20.6341
IgD+ B cell Absolute Count	rs150663332	8	2044843	T	C	0.0839	-0.2314	0.04374	3657	1.28399e-07	27.9802
IgD+ B cell Absolute Count	rs3019260	8	102068804	A	C	0.3173	0.1185	0.02595	3657	5.12495e-06	20.847
IgD+ B cell Absolute Count	rs701839	10	102955294	G	A	0.7123	0.1309	0.02785	3657	2.713e-06	22.0856
IgD+ B cell Absolute Count	rs189761842	10	125485345	T	C	0.0055	0.8269	0.1697	3657	1.15199e-06	23.7369
IgD+ B cell Absolute Count	rs116906133	13	100023905	G	A	0.0037	-0.9845	0.2207	3657	8.4349e-06	19.8934
IgD+ B cell Absolute Count	rs4145212	13	108960188	A	T	0.5405	0.1284	0.02442	3657	1.52901e-07	27.6388
IgD+ B cell Absolute Count	rs3811215	14	22954777	T	G	0.3033	-0.1332	0.02679	3657	6.85993e-07	24.7141
IgD+ B cell Absolute Count	rs11638959	15	25171150	A	G	0.1557	0.1525	0.03281	3657	3.46801e-06	21.5977
IgD+ B cell Absolute Count	rs143176410	16	84305239	C	G	0.001	1.831	0.4032	3657	5.75705e-06	20.6166
IgD+ B cell Absolute Count	rs11653761	17	2716535	T	G	0.5919	-0.1212	0.02449	3657	7.76998e-07	24.4855
IgD+ B cell Absolute Count	rs62067029	17	38038391	T	A	0.4148	-0.1669	0.0285	3657	5.11505e-09	34.285
IgD+ B cell Absolute Count	rs67017503	17	74280991	A	C	0.0759	0.2021	0.04547	3657	9.09704e-06	19.7499
IgD+ B cell Absolute Count	rs12461001	19	14885525	A	G	0.6292	0.1175	0.02527	3657	3.43202e-06	21.6146
IgD+ B cell Absolute Count	rs77110486	20	56359017	T	C	0.0107	0.522	0.1168	3657	8.14798e-06	19.9681
IgD- CD27- B cell Absolute Count	rs61786059	1	29035758	T	G	0.3135	-0.1238	0.02692	3656	4.44601e-06	21.1433
IgD- CD27- B cell Absolute Count	rs7518494	1	217233446	A	G	0.9334	0.2278	0.04884	3656	3.211e-06	21.7489
IgD- CD27- B cell Absolute Count	rs185621536	1	113524501	T	C	0.0312	-0.3205	0.07004	3656	4.89396e-06	20.9336
IgD- CD27- B cell Absolute Count	rs12129123	1	10083709	T	C	0.2221	-0.1387	0.0309	3656	7.36207e-06	20.1427
IgD- CD27- B cell Absolute Count	rs72953104	1	41379583	G	C	0.0643	0.2313	0.05018	3656	4.17503e-06	21.2408
IgD- CD27- B cell Absolute Count	rs113442137	1	160254955	A	G	0.0472	-0.2567	0.05748	3656	8.20994e-06	19.9388
IgD- CD27- B cell Absolute Count	rs11688492	2	64865804	C	T	0.5196	-0.1216	0.02504	3656	1.243e-06	23.5765
IgD- CD27- B cell Absolute Count	rs7606024	2	56616595	A	T	0.7882	-0.1375	0.03037	3656	6.15404e-06	20.4926
IgD- CD27- B cell Absolute Count	rs114551034	2	66709035	A	G	0.0509	-0.2787	0.05695	3656	1.033e-06	23.9424
IgD- CD27- B cell Absolute Count	rs35574803	3	32533246	C	T	0.0562	-0.2808	0.05393	3656	2.01999e-07	27.1028
IgD- CD27- B cell Absolute Count	rs13099360	3	60476875	G	A	0.0466	-0.263	0.05944	3656	9.95612e-06	19.572
IgD- CD27- B cell Absolute Count	rs59951351	4	38152090	T	A	0.1171	0.173	0.03878	3656	8.37298e-06	19.8956
IgD- CD27- B cell Absolute Count	rs74356874	5	22936562	A	G	0.0066	0.6631	0.1462	3656	5.96499e-06	20.5657
IgD- CD27- B cell Absolute Count	rs144306835	8	96356983	A	G	0.0234	0.3826	0.07964	3656	1.617e-06	23.0732
IgD- CD27- B cell Absolute Count	rs112432445	9	4162626	A	G	0.0528	0.2796	0.05583	3656	5.767e-07	25.0738
IgD- CD27- B cell Absolute Count	rs78763642	9	25294308	A	G	0.0279	-0.3304	0.07442	3656	9.2841e-06	19.7052
IgD- CD27- B cell Absolute Count	rs117493606	10	28340929	G	T	0.009	0.6463	0.1428	3656	6.19099e-06	20.4783
IgD- CD27- B cell Absolute Count	rs117833074	12	77551907	C	T	0.1146	-0.1795	0.0403	3656	8.64908e-06	19.8335
IgD- CD27- B cell Absolute Count	rs1047792	12	6649099	T	G	0.176	-0.1467	0.03249	3656	6.49995e-06	20.3818
IgD- CD27- B cell Absolute Count	rs2250246	12	6553016	G	A	0.5341	0.1359	0.02451	3656	3.12903e-08	30.735
IgD- CD27- B cell Absolute Count	rs11843493	13	47527957	C	A	0.4944	-0.1109	0.02482	3656	8.19691e-06	19.9591
IgD- CD27- B cell Absolute Count	rs421516	17	63135589	A	C	0.9583	-0.2897	0.0627	3656	3.96798e-06	21.3424
IgD- CD27- B cell Absolute Count	rs11661511	18	60852258	C	T	0.6704	-0.1204	0.02636	3656	5.03999e-06	20.8566
IgD- CD27- B cell Absolute Count	rs72977632	19	1930174	A	T	0.0643	-0.2296	0.05036	3656	5.325e-06	20.7804
IgD- CD27- B cell Absolute Count	rs406298	19	16409903	G	C	0.5327	0.1135	0.0244	3656	3.38602e-06	21.6318
IgD- CD27- B cell Absolute Count	rs77126700	20	47313887	C	T	0.0239	0.3825	0.08026	3656	1.95101e-06	22.7063
IgD- CD27- B cell Absolute Count	rs4239702	20	44749251	C	T	0.6002	0.2841	0.02593	3656	1.6421e-27	120.01
IgD- CD27- B cell Absolute Count	rs909692	22	50710633	G	C	0.4683	-0.1107	0.02495	3656	9.356e-06	19.6805
IgD- CD27- B cell Absolute Count	rs9615714	22	48376963	G	A	0.1421	-0.1733	0.03486	3656	6.94592e-07	24.7072
Switched memory B cell %B cell	rs72757888	1	233045963	T	C	0.01	-0.5733	0.1213	3657	2.36701e-06	22.3318
Switched memory B cell %B cell	rs11204752	1	150958133	C	T	0.5387	0.1189	0.02561	3657	3.58501e-06	21.5489
Switched memory B cell %B cell	rs1519529	2	136974257	G	C	0.2363	0.1327	0.02951	3657	7.13806e-06	20.2155
Switched memory B cell %B cell	rs138919897	3	106834795	G	A	0.0019	-1.348	0.3023	3657	8.49298e-06	19.8785
Switched memory B cell %B cell	rs55658041	4	164291862	T	G	0.0037	1.008	0.2105	3657	1.75102e-06	22.9244
Switched memory B cell %B cell	rs17405603	5	144608340	T	A	0.2841	-0.1414	0.02795	3657	4.40301e-07	25.5868
Switched memory B cell %B cell	rs830682	5	165597506	C	T	0.7383	-0.1286	0.02855	3657	6.85394e-06	20.2839
Switched memory B cell %B cell	rs9265880	6	31313054	C	T	0.4717	-0.1543	0.0316	3657	1.096e-06	23.8363
Switched memory B cell %B cell	rs2450220	8	119323401	T	C	0.816	0.1522	0.03212	3657	2.24698e-06	22.4471
Switched memory B cell %B cell	rs140191306	9	2570753	T	C	0.0179	-0.4624	0.09477	3657	1.11199e-06	23.7999
Switched memory B cell %B cell	rs2105800	11	90592716	A	G	0.4881	-0.1181	0.02607	3657	6.11406e-06	20.5163
Switched memory B cell %B cell	rs11068290	12	110228055	T	C	0.0231	-0.407	0.08203	3657	7.305e-07	24.6107
Switched memory B cell %B cell	rs114917376	17	51764168	G	A	0.0958	0.1985	0.04285	3657	3.74197e-06	21.4536
Switched memory B cell %B cell	rs73426855	17	77637123	C	T	0.1471	0.1769	0.03524	3657	5.427e-07	25.1921
Switched memory B cell Absolute Count	rs142587763	1	165680636	T	C	0.0435	-0.2707	0.05949	3656	5.51099e-06	20.7
Switched memory B cell Absolute Count	rs115414430	2	36720835	G	C	0.0286	0.3537	0.07458	3656	2.19599e-06	22.4857
Switched memory B cell Absolute Count	rs1519526	2	136967396	C	T	0.1957	0.1511	0.03122	3656	1.34999e-06	23.4177
Switched memory B cell Absolute Count	rs7595246	2	238554657	C	T	0.1893	0.1458	0.03118	3656	3.01502e-06	21.8597
Switched memory B cell Absolute Count	rs73185679	3	186485863	C	T	0.1041	0.1794	0.03978	3656	6.65794e-06	20.3328
Switched memory B cell Absolute Count	rs141352577	3	8492010	T	C	0.0235	0.3583	0.07898	3656	5.91099e-06	20.575
Switched memory B cell Absolute Count	rs115218350	3	104146883	A	T	0.0008	-1.838	0.4006	3656	4.61403e-06	21.0451
Switched memory B cell Absolute Count	rs80076964	4	94935625	C	G	0.0141	0.481	0.1008	3656	1.88499e-06	22.7641
Switched memory B cell Absolute Count	rs4697617	4	25771115	A	G	0.7103	0.1212	0.02695	3656	7.07001e-06	20.2194
Switched memory B cell Absolute Count	rs452973	5	11308990	T	G	0.2705	0.1223	0.02758	3656	9.50101e-06	19.6583
Switched memory B cell Absolute Count	rs4076316	6	167859623	A	T	0.3005	-0.1251	0.02725	3656	4.53503e-06	21.0699
Switched memory B cell Absolute Count	rs1161387	6	50598963	G	C	0.286	0.1297	0.02914	3656	8.86605e-06	19.8053
Switched memory B cell Absolute Count	rs60508745	7	40554169	C	T	0.5137	-0.1161	0.02496	3656	3.37202e-06	21.63
Switched memory B cell Absolute Count	rs11777835	8	144986103	C	T	0.5715	-0.1238	0.02489	3656	6.82606e-07	24.7328
Switched memory B cell Absolute Count	rs62521107	8	118851954	T	C	0.058	-0.2543	0.05357	3656	2.146e-06	22.5284
Switched memory B cell Absolute Count	rs2454536	10	53764740	C	T	0.283	-0.1356	0.02771	3656	1.02301e-06	23.9402
Switched memory B cell Absolute Count	rs192544457	13	42337460	A	G	0.006	0.7964	0.161	3656	7.87209e-07	24.462
Switched memory B cell Absolute Count	rs73178168	13	47809629	T	C	0.1703	0.16	0.03344	3656	1.77599e-06	22.887
Switched memory B cell Absolute Count	rs9520836	13	108957063	G	A	0.5044	0.1323	0.02454	3656	7.42694e-08	29.0571
Switched memory B cell Absolute Count	rs11653761	17	2716535	T	G	0.592	-0.1273	0.02469	3656	2.65497e-07	26.5764
Switched memory B cell Absolute Count	rs421516	17	63135589	A	C	0.9583	-0.2923	0.06252	3656	3.03103e-06	21.8525
Switched memory B cell Absolute Count	rs117605782	18	46442174	A	G	0.0034	0.9179	0.2043	3656	7.27998e-06	20.1807
Switched memory B cell Absolute Count	rs149462070	21	14412199	C	A	0.0056	-0.7487	0.1638	3656	5.05406e-06	20.8867
Switched memory B cell Absolute Count	rs77741094	21	42362418	G	C	0.0126	-0.5466	0.1111	3656	9.03192e-07	24.1987
Switched memory B cell Absolute Count	rs5994482	22	32570873	G	C	0.103	-0.1828	0.04049	3656	6.51703e-06	20.3769
Plasma Blast-Plasma Cell %B cell	rs187723151	1	242186219	A	G	0.004	-0.9069	0.1924	3658	2.52e-06	22.2121
Plasma Blast-Plasma Cell %B cell	rs2792563	1	213100225	A	G	0.5671	-0.1287	0.02511	3658	3.14702e-07	26.263
Plasma Blast-Plasma Cell %B cell	rs150152228	2	235278654	G	A	0.0012	-1.507	0.3325	3658	6.01395e-06	20.5364
Plasma Blast-Plasma Cell %B cell	rs79423067	4	143873369	T	A	0.0149	0.4869	0.1059	3658	4.44795e-06	21.1334
Plasma Blast-Plasma Cell %B cell	rs78804535	4	144419847	T	C	0.0316	0.3286	0.07069	3658	3.46897e-06	21.6023
Plasma Blast-Plasma Cell %B cell	rs140642786	5	148927495	A	G	0.1223	0.1711	0.03733	3658	4.75499e-06	21.0022
Plasma Blast-Plasma Cell %B cell	rs2019885	5	163177849	C	T	0.1211	-0.1749	0.03747	3658	3.15798e-06	21.7818
Plasma Blast-Plasma Cell %B cell	rs193552	5	148172599	T	A	0.6506	0.1159	0.02556	3658	5.951e-06	20.5554
Plasma Blast-Plasma Cell %B cell	rs34629	5	60527506	A	G	0.0633	-0.2427	0.05008	3658	1.31299e-06	23.4797
Plasma Blast-Plasma Cell %B cell	rs61294310	6	5266557	G	A	0.0124	0.5	0.1092	3658	4.853e-06	20.9593
Plasma Blast-Plasma Cell %B cell	rs11754551	6	145631063	C	T	0.0681	0.2127	0.04774	3658	8.67301e-06	19.845
Plasma Blast-Plasma Cell %B cell	rs78370279	7	71338898	G	A	0.0104	0.5592	0.1204	3658	3.54103e-06	21.5657
Plasma Blast-Plasma Cell %B cell	rs74326785	8	24549984	C	T	0.0279	0.3429	0.07479	3658	4.69397e-06	21.015
Plasma Blast-Plasma Cell %B cell	rs138542577	8	16074805	C	G	0.0376	0.3534	0.06406	3658	3.708e-08	30.4257
Plasma Blast-Plasma Cell %B cell	rs4458909	8	118447297	A	G	0.3324	-0.1199	0.02567	3658	3.09599e-06	21.8106
Plasma Blast-Plasma Cell %B cell	rs3138500	9	92219945	T	C	0.0678	-0.2223	0.04922	3658	6.48993e-06	20.3928
Plasma Blast-Plasma Cell %B cell	rs12412378	10	130483163	A	C	0.1607	-0.1669	0.0328	3658	3.77798e-07	25.8849
Plasma Blast-Plasma Cell %B cell	rs185836310	10	73504848	C	T	0.051	-0.257	0.05578	3658	4.23e-06	21.2222
Plasma Blast-Plasma Cell %B cell	rs76195952	11	129797755	T	C	0.0142	-0.4648	0.1027	3658	6.24698e-06	20.4773
Plasma Blast-Plasma Cell %B cell	rs55728331	11	117526440	A	G	0.0015	1.708	0.3449	3658	7.60694e-07	24.5172
Plasma Blast-Plasma Cell %B cell	rs10849436	12	6409619	A	G	0.1595	0.1576	0.0337	3658	3.01599e-06	21.8642
Plasma Blast-Plasma Cell %B cell	rs62012610	15	34006114	C	G	0.0381	0.2879	0.06268	3658	4.51898e-06	21.0915
Plasma Blast-Plasma Cell %B cell	rs8191161	16	82103595	C	G	0.0832	-0.2036	0.0447	3658	5.427e-06	20.7406
Plasma Blast-Plasma Cell %B cell	rs12709039	16	59861376	A	C	0.7365	-0.1407	0.02784	3658	4.57499e-07	25.5347
Plasma Blast-Plasma Cell %B cell	rs80148662	17	52836239	A	G	0.0137	0.4702	0.1048	3658	7.45504e-06	20.1244
Plasma Blast-Plasma Cell %B cell	rs186329	19	56065534	C	T	0.1706	0.154	0.03221	3658	1.79999e-06	22.8529
Plasma Blast-Plasma Cell %B cell	rs8132059	21	16916284	T	C	0.2243	-0.1288	0.02877	3658	7.73891e-06	20.037
Plasma Blast-Plasma Cell %B cell	rs11089305	22	19729361	G	A	0.2881	0.1338	0.02685	3658	6.51793e-07	24.8259
Plasma Blast-Plasma Cell Absolute Count	rs80297308	1	102294391	T	C	0.0015	1.467	0.3075	3657	1.911e-06	22.7537
Plasma Blast-Plasma Cell Absolute Count	rs10800645	1	199586940	A	G	0.5844	0.1124	0.02479	3657	5.95498e-06	20.5523
Plasma Blast-Plasma Cell Absolute Count	rs74458303	2	121699864	A	G	0.0004	2.692	0.5745	3657	2.89701e-06	21.9508
Plasma Blast-Plasma Cell Absolute Count	rs148362575	2	187165335	T	A	0.0008	2.566	0.5486	3657	3.02998e-06	21.8717
Plasma Blast-Plasma Cell Absolute Count	rs148389014	3	188082431	T	C	0.0051	0.7633	0.1696	3657	7.01601e-06	20.2498
Plasma Blast-Plasma Cell Absolute Count	rs116540222	3	117331256	T	C	0.0011	1.671	0.3677	3657	5.67806e-06	20.6465
Plasma Blast-Plasma Cell Absolute Count	rs149048155	3	957228	C	A	0.036	-0.2902	0.06467	3657	7.45401e-06	20.1312
Plasma Blast-Plasma Cell Absolute Count	rs62353585	4	168102710	C	T	0.0227	0.3653	0.07865	3657	3.53403e-06	21.5667
Plasma Blast-Plasma Cell Absolute Count	rs76709581	5	179574693	C	T	0.1061	-0.1773	0.03843	3657	4.06097e-06	21.2793
Plasma Blast-Plasma Cell Absolute Count	rs7449190	5	1297918	C	T	0.7401	0.1236	0.02749	3657	7.09807e-06	20.2101
Plasma Blast-Plasma Cell Absolute Count	rs61294310	6	5266557	G	A	0.0124	0.5137	0.1072	3657	1.736e-06	22.9568
Plasma Blast-Plasma Cell Absolute Count	rs4506076	6	8860293	C	A	0.8043	-0.1344	0.03016	3657	8.53591e-06	19.8526
Plasma Blast-Plasma Cell Absolute Count	rs149559870	8	39638049	T	C	0.0157	0.4466	0.09807	3657	5.432e-06	20.7322
Plasma Blast-Plasma Cell Absolute Count	rs74565954	8	24520468	T	C	0.0135	0.4919	0.1035	3657	2.10199e-06	22.5816
Plasma Blast-Plasma Cell Absolute Count	rs62519719	8	118376967	A	G	0.2815	-0.1239	0.02639	3657	2.791e-06	22.0366
Plasma Blast-Plasma Cell Absolute Count	rs12412378	10	130483163	A	C	0.1608	-0.16	0.03222	3657	7.18704e-07	24.653
Plasma Blast-Plasma Cell Absolute Count	rs1681588	14	23098304	C	T	0.5559	0.1086	0.02407	3657	6.61698e-06	20.3511
Plasma Blast-Plasma Cell Absolute Count	rs17765677	16	65999760	C	T	0.0304	-0.3422	0.07069	3657	1.34499e-06	23.4275
Plasma Blast-Plasma Cell Absolute Count	rs7185719	16	59859266	G	C	0.732	-0.1228	0.02721	3657	6.561e-06	20.362
Plasma Blast-Plasma Cell Absolute Count	rs112471525	17	52797903	G	A	0.0189	0.3865	0.0862	3657	7.58298e-06	20.0986
Plasma Blast-Plasma Cell Absolute Count	rs72883992	18	24475181	C	G	0.0807	0.1932	0.04342	3657	8.82104e-06	19.7932
Plasma Blast-Plasma Cell Absolute Count	rs4806937	19	3443405	A	C	0.3229	-0.1145	0.02557	3657	7.79292e-06	20.0461
Plasma Blast-Plasma Cell Absolute Count	rs6014246	20	53613034	A	G	0.3112	-0.1186	0.02577	3657	4.30299e-06	21.1749
Plasma Blast-Plasma Cell Absolute Count	rs4820558	22	21022887	G	C	0.466	0.1172	0.02408	3657	1.19399e-06	23.6823
Plasma Blast-Plasma Cell Absolute Count	rs28652751	22	35861208	A	T	0.3179	-0.1141	0.02564	3657	8.85707e-06	19.7978
Memory B cell %B cell	rs75766272	1	8009985	T	C	0.0201	-0.468	0.08646	3657	6.601e-08	29.2916
Memory B cell %B cell	rs4658141	1	89814066	C	T	0.3805	-0.1354	0.02587	3657	1.73201e-07	27.3858
Memory B cell %B cell	rs149876490	1	16668240	T	C	0.0027	-1.002	0.224	3657	7.993e-06	20.0042
Memory B cell %B cell	rs7412746	1	150860471	T	C	0.5153	-0.138	0.02542	3657	6.03295e-08	29.4638
Memory B cell %B cell	rs72635970	2	73868977	G	T	0.0444	0.3572	0.06109	3657	5.44703e-09	34.1794
Memory B cell %B cell	rs116391651	2	183843344	A	G	0.0161	0.426	0.09616	3657	9.69393e-06	19.6206
Memory B cell %B cell	rs72844588	2	138420154	A	G	0.0913	0.2178	0.04314	3657	4.671e-07	25.4822
Memory B cell %B cell	rs55710170	3	16416145	A	G	0.1181	-0.1745	0.03783	3657	4.11604e-06	21.2716
Memory B cell %B cell	rs60515154	4	47914545	T	C	0.7517	0.1306	0.02887	3657	6.30304e-06	20.4585
Memory B cell %B cell	rs35698683	4	11590243	G	A	0.0447	-0.2768	0.05925	3657	3.09899e-06	21.8191
Memory B cell %B cell	rs77312528	4	36385921	G	T	0.0107	-0.6233	0.1256	3657	7.26993e-07	24.6205
Memory B cell %B cell	rs895377	5	58050530	A	G	0.3683	-0.1351	0.02599	3657	2.13e-07	27.0134
Memory B cell %B cell	rs690488	5	40183220	A	C	0.8588	0.1701	0.03602	3657	2.43703e-06	22.2947
Memory B cell %B cell	rs115405874	5	119742816	G	A	0.0037	0.9926	0.2014	3657	8.60994e-07	24.2835
Memory B cell %B cell	rs62398379	6	37585447	C	T	0.4032	0.1256	0.0259	3657	1.28301e-06	23.5105
Memory B cell %B cell	rs9270558	6	32560667	A	G	0.5249	-0.1488	0.03249	3657	4.79899e-06	20.9695
Memory B cell %B cell	rs9492229	6	129409652	C	T	0.9556	0.3141	0.06101	3657	2.74998e-07	26.4981
Memory B cell %B cell	rs633090	8	12933368	T	A	0.3414	0.115	0.02571	3657	7.96196e-06	20.002
Memory B cell %B cell	rs140191306	9	2570753	T	C	0.0179	-0.4176	0.09392	3657	8.96396e-06	19.7645
Memory B cell %B cell	rs145123647	10	26959594	T	C	0.003	-1.082	0.2244	3657	1.48898e-06	23.2429
Memory B cell %B cell	rs10750504	11	132156175	A	C	0.1135	-0.1775	0.03942	3657	6.93202e-06	20.2696
Memory B cell %B cell	rs61896866	11	111318165	A	G	0.2428	0.1294	0.0287	3657	6.71506e-06	20.3229
Memory B cell %B cell	rs112570989	12	2866164	T	C	0.0149	-0.4739	0.1022	3657	3.63203e-06	21.4958
Memory B cell %B cell	rs9584780	13	98901269	C	T	0.0257	0.3691	0.07708	3657	1.754e-06	22.9238
Memory B cell %B cell	rs76477280	13	50147180	G	A	0.0206	0.4292	0.08807	3657	1.14301e-06	23.7435
Memory B cell %B cell	rs116844769	14	65713895	A	G	0.0662	0.2839	0.05066	3657	2.26199e-08	31.3965
Memory B cell %B cell	rs77762131	14	96205838	C	G	0.045	0.2733	0.05819	3657	2.73401e-06	22.0528
Memory B cell %B cell	rs72914692	18	54422995	A	G	0.018	0.4209	0.09317	3657	6.44896e-06	20.4027
Memory B cell %B cell	rs329966	19	53070617	G	A	0.5425	0.1104	0.02479	3657	8.72509e-06	19.8274
Memory B cell Absolute Count	rs16867231	2	181050023	A	G	0.0108	0.538	0.1157	3656	3.44897e-06	21.6162
Memory B cell Absolute Count	rs10018308	4	120657899	G	A	0.3441	0.1198	0.0268	3656	8.09003e-06	19.9768
Memory B cell Absolute Count	rs17708396	5	148410250	A	C	0.0005	2.504	0.522	3656	1.67699e-06	23.0043
Memory B cell Absolute Count	rs12216018	6	130514590	T	C	0.1415	-0.1641	0.03601	3656	5.39399e-06	20.7612
Memory B cell Absolute Count	rs74565175	7	81370578	A	G	0.2009	0.1371	0.03052	3656	7.27394e-06	20.1738
Memory B cell Absolute Count	rs77643931	9	129171041	G	T	0.2798	0.1235	0.02777	3656	8.97408e-06	19.7726
Memory B cell Absolute Count	rs12763172	10	85447519	C	T	0.7213	0.1259	0.02783	3656	6.26801e-06	20.46
Memory B cell Absolute Count	rs2879633	10	53757050	A	G	0.2884	-0.1301	0.02775	3656	2.84302e-06	21.974
Memory B cell Absolute Count	rs36072728	11	29448646	T	C	0.0356	0.305	0.06718	3656	5.80805e-06	20.6063
Memory B cell Absolute Count	rs557577736	13	46224092	G	A	0.001	1.829	0.3891	3656	2.68701e-06	22.0895
Memory B cell Absolute Count	rs12874404	13	108993494	G	A	0.3256	0.173	0.02661	3656	9.13903e-11	42.2555
Memory B cell Absolute Count	rs61997631	14	104600920	G	C	0.0432	-0.2972	0.06141	3656	1.357e-06	23.4153
Memory B cell Absolute Count	rs77762131	14	96205838	C	G	0.045	0.2713	0.05795	3656	2.94503e-06	21.9116
Memory B cell Absolute Count	rs139196765	15	24733764	G	A	0.0025	1.204	0.2523	3656	1.89802e-06	22.7667
Memory B cell Absolute Count	rs11653761	17	2716535	T	G	0.592	-0.1161	0.02478	3656	2.93799e-06	21.9454
Memory B cell Absolute Count	rs144295598	22	45164171	A	G	0.0103	0.6102	0.1207	3656	4.46303e-07	25.5512
Memory B cell Absolute Count	rs9614226	22	44688150	G	T	0.9792	-0.4235	0.08713	3656	1.22101e-06	23.6185
Naive-mature B cell %B cell	rs4658141	1	89814066	C	T	0.3805	0.1371	0.0259	3657	1.28499e-07	28.0128
Naive-mature B cell %B cell	rs7412746	1	150860471	T	C	0.5153	0.1312	0.02547	3657	2.74802e-07	26.5272
Naive-mature B cell %B cell	rs75766272	1	8009985	T	C	0.0201	0.463	0.0866	3657	9.55103e-08	28.5764
Naive-mature B cell %B cell	rs149876490	1	16668240	T	C	0.0027	1.014	0.2243	3657	6.30798e-06	20.4314
Naive-mature B cell %B cell	rs72844588	2	138420154	A	G	0.0913	-0.2131	0.04321	3657	8.50492e-07	24.3153
Naive-mature B cell %B cell	rs13421263	2	169182294	T	C	0.0528	0.2616	0.05638	3657	3.61801e-06	21.5232
Naive-mature B cell %B cell	rs72635970	2	73868977	G	T	0.0444	-0.3399	0.06121	3657	3.01301e-08	30.8275
Naive-mature B cell %B cell	rs55710170	3	16416145	A	G	0.1181	0.1678	0.03789	3657	9.81002e-06	19.6072
Naive-mature B cell %B cell	rs35698683	4	11590243	G	A	0.0447	0.2687	0.05935	3657	6.16595e-06	20.4916
Naive-mature B cell %B cell	rs77312528	4	36385921	G	T	0.0107	0.6035	0.1258	3657	1.68101e-06	23.0078
Naive-mature B cell %B cell	rs115405874	5	119742816	G	A	0.0037	-1.013	0.2016	3657	5.36896e-07	25.2417
Naive-mature B cell %B cell	rs690488	5	40183220	A	C	0.8588	-0.1667	0.03608	3657	3.98502e-06	21.3412
Naive-mature B cell %B cell	rs895377	5	58050530	A	G	0.3683	0.1314	0.02603	3657	4.65297e-07	25.4756
Naive-mature B cell %B cell	rs62398379	6	37585447	C	T	0.4032	-0.1251	0.02593	3657	1.46201e-06	23.2697
Naive-mature B cell %B cell	rs9492229	6	129409652	C	T	0.9556	-0.3012	0.06111	3657	8.684e-07	24.2866
Naive-mature B cell %B cell	rs9270578	6	32561093	A	G	0.5261	0.1477	0.03279	3657	6.89001e-06	20.2843
Naive-mature B cell %B cell	rs633090	8	12933368	T	A	0.3414	-0.1163	0.02575	3657	6.45996e-06	20.3932
Naive-mature B cell %B cell	rs145123647	10	26959594	T	C	0.003	1.077	0.2247	3657	1.71902e-06	22.9671
Naive-mature B cell %B cell	rs61896866	11	111318165	A	G	0.2428	-0.1306	0.02874	3657	5.65601e-06	20.644
Naive-mature B cell %B cell	rs2334904	11	132133144	A	G	0.114	0.1801	0.03937	3657	4.91405e-06	20.9208
Naive-mature B cell %B cell	rs112570989	12	2866164	T	C	0.0149	0.4852	0.1023	3657	2.19099e-06	22.4891
Naive-mature B cell %B cell	rs76477280	13	50147180	G	A	0.0206	-0.4222	0.08821	3657	1.76498e-06	22.9025
Naive-mature B cell %B cell	rs9584780	13	98901269	C	T	0.0257	-0.388	0.07717	3657	5.199e-07	25.2725
Naive-mature B cell %B cell	rs2476213	13	102612226	T	C	0.5659	0.1119	0.02521	3657	9.30294e-06	19.6968
Naive-mature B cell %B cell	rs77762131	14	96205838	C	G	0.045	-0.2722	0.05828	3657	3.10099e-06	21.8081
Naive-mature B cell %B cell	rs974368	14	63009549	A	G	0.5141	-0.1154	0.025	3657	4.08e-06	21.3016
Naive-mature B cell %B cell	rs116844769	14	65713895	A	G	0.0662	-0.2677	0.05076	3657	1.41599e-07	27.8058
Naive-mature B cell %B cell	rs72914692	18	54422995	A	G	0.018	-0.4239	0.0933	3657	5.72203e-06	20.6369
Naive-mature B cell %B cell	rs9614418	22	44674143	G	C	0.0005	-2.179	0.4823	3657	6.418e-06	20.4062
Naive-mature B cell Absolute Count	rs139077655	2	132741527	T	C	0.382	-0.1159	0.02519	3656	4.36697e-06	21.1637
Naive-mature B cell Absolute Count	rs76981518	4	152777207	T	C	0.0744	-0.2134	0.04708	3656	6.00897e-06	20.5398
Naive-mature B cell Absolute Count	rs115150472	5	146138788	T	C	0.0004	2.627	0.579	3656	5.91398e-06	20.5799
Naive-mature B cell Absolute Count	rs10042327	5	58278611	A	G	0.0613	0.233	0.05192	3656	7.40491e-06	20.1337
Naive-mature B cell Absolute Count	rs17056318	5	158285953	C	T	0.081	-0.2366	0.0457	3656	2.36499e-07	26.7965
Naive-mature B cell Absolute Count	rs9354413	6	67039330	C	T	0.2964	0.1232	0.02743	3656	7.29794e-06	20.1674
Naive-mature B cell Absolute Count	rs35607968	7	67653879	T	C	0.1536	0.1584	0.03419	3656	3.71304e-06	21.4582
Naive-mature B cell Absolute Count	rs2390504	7	21321670	A	G	0.0486	-0.2668	0.05743	3656	3.51002e-06	21.5762
Naive-mature B cell Absolute Count	rs143397127	7	12847391	C	T	0.0157	-0.4624	0.09926	3656	3.298e-06	21.6954
Naive-mature B cell Absolute Count	rs2395904	8	130617819	G	T	0.2657	-0.1445	0.02761	3656	1.74e-07	27.3832
Naive-mature B cell Absolute Count	rs283340	8	70193536	C	T	0.5621	0.1251	0.02477	3656	4.59505e-07	25.5002
Naive-mature B cell Absolute Count	rs189761842	10	125485345	T	C	0.0055	0.7902	0.1709	3656	3.91796e-06	21.3733
Naive-mature B cell Absolute Count	rs117344365	10	33779474	A	G	0.0178	-0.4129	0.09241	3656	8.12905e-06	19.9587
Naive-mature B cell Absolute Count	rs12799241	11	119980729	A	G	0.2619	0.138	0.02805	3656	9.06797e-07	24.1977
Naive-mature B cell Absolute Count	rs2286599	12	6499533	A	G	0.32	0.1183	0.0266	3656	8.96004e-06	19.7737
Naive-mature B cell Absolute Count	rs58114937	12	67638132	G	A	0.1302	0.1702	0.0363	3656	2.84499e-06	21.9779
Naive-mature B cell Absolute Count	rs9564767	13	71534535	G	A	0.6075	-0.1163	0.02507	3656	3.62602e-06	21.5145
Naive-mature B cell Absolute Count	rs3811215	14	22954777	T	G	0.3032	-0.1229	0.02697	3656	5.33495e-06	20.7598
Naive-mature B cell Absolute Count	rs76263497	15	60878804	A	G	0.0989	-0.1886	0.04138	3656	5.33703e-06	20.7675
Naive-mature B cell Absolute Count	rs143176410	16	84305239	C	G	0.001	1.819	0.4058	3656	7.65297e-06	20.0873
Naive-mature B cell Absolute Count	rs77983244	17	7316027	A	G	0.0325	-0.3088	0.06711	3656	4.341e-06	21.1671
Naive-mature B cell Absolute Count	rs62067029	17	38038391	T	A	0.4148	-0.1605	0.02868	3656	2.34601e-08	31.3093
Naive-mature B cell Absolute Count	rs62115322	19	53848484	G	C	0.2083	0.1382	0.02968	3656	3.31002e-06	21.6755
Naive-mature B cell Absolute Count	rs34764986	20	59926554	C	T	0.0699	-0.2347	0.04805	3656	1.08201e-06	23.8518
IgD- CD38+ B cell %B cell	rs2792563	1	213100225	A	G	0.567	-0.1407	0.02479	3657	1.494e-08	32.2045
IgD- CD38+ B cell %B cell	rs1250061	2	216542855	A	T	0.5554	-0.1078	0.02407	3657	7.79399e-06	20.0524
IgD- CD38+ B cell %B cell	rs12636371	3	125894785	A	G	0.4619	0.1185	0.02414	3657	9.60993e-07	24.0904
IgD- CD38+ B cell %B cell	rs12493961	3	11244825	G	A	0.0219	0.3884	0.08136	3657	1.883e-06	22.7834
IgD- CD38+ B cell %B cell	rs13075403	3	28830276	G	A	0.7616	0.1247	0.02799	3657	8.55894e-06	19.843
IgD- CD38+ B cell %B cell	rs11938966	4	55386841	A	C	0.0294	0.3165	0.06988	3657	6.1e-06	20.508
IgD- CD38+ B cell %B cell	rs76912165	5	92965344	G	A	0.0209	0.4094	0.08778	3657	3.21699e-06	21.7463
IgD- CD38+ B cell %B cell	rs139843122	6	107939307	T	A	0.0123	-0.5032	0.1082	3657	3.39899e-06	21.6226
IgD- CD38+ B cell %B cell	rs148377259	7	106306631	C	T	0.034	-0.3437	0.06603	3657	2.037e-07	27.0868
IgD- CD38+ B cell %B cell	rs13235778	7	57550983	A	G	0.2801	-0.1235	0.02712	3657	5.46298e-06	20.7317
IgD- CD38+ B cell %B cell	rs10270812	7	68026886	C	T	0.5103	-0.118	0.0244	3657	1.38599e-06	23.3811
IgD- CD38+ B cell %B cell	rs188550599	8	15730211	G	A	0.0142	0.44	0.098	3657	7.33297e-06	20.1528
IgD- CD38+ B cell %B cell	rs138542577	8	16074805	C	G	0.0376	0.3227	0.06331	3657	3.63898e-07	25.9737
IgD- CD38+ B cell %B cell	rs137930158	8	109663198	C	G	0.007	-0.6636	0.1413	3657	2.76102e-06	22.0501
IgD- CD38+ B cell %B cell	rs113087021	11	97765784	A	T	0.0766	0.2024	0.04541	3657	8.53002e-06	19.8609
IgD- CD38+ B cell %B cell	rs478251	11	127827727	C	A	0.1333	0.1745	0.03499	3657	6.44496e-07	24.8648
IgD- CD38+ B cell %B cell	rs238926	11	113975210	A	G	0.369	-0.1152	0.02506	3657	4.39805e-06	21.1263
IgD- CD38+ B cell %B cell	rs7185719	16	59859266	G	C	0.732	-0.1257	0.02735	3657	4.43803e-06	21.1172
IgD- CD38+ B cell %B cell	rs11705673	22	45016637	G	C	0.12	0.1701	0.0368	3657	3.95103e-06	21.3597
IgD+ CD24+ B cell %B cell	rs75766272	1	8009985	T	C	0.0201	-0.4552	0.08737	3657	1.99402e-07	27.1369
IgD+ CD24+ B cell %B cell	rs11584183	1	230130712	C	T	0.2311	-0.1336	0.03015	3657	9.70197e-06	19.63
IgD+ CD24+ B cell %B cell	rs45608038	2	73679013	G	A	0.0421	0.2797	0.063	3657	9.25295e-06	19.7054
IgD+ CD24+ B cell %B cell	rs6781675	3	4408435	C	G	0.0235	0.3685	0.08216	3657	7.49307e-06	20.1111
IgD+ CD24+ B cell %B cell	rs11134931	5	175234476	A	G	0.6924	-0.1214	0.02723	3657	8.45999e-06	19.8712
IgD+ CD24+ B cell %B cell	rs34418535	6	32553200	G	A	0.064	0.4368	0.09069	3657	1.52398e-06	23.1914
IgD+ CD24+ B cell %B cell	rs45575344	6	133003242	C	T	0.1333	-0.1674	0.0367	3657	5.27898e-06	20.7998
IgD+ CD24+ B cell %B cell	rs147867176	6	169106376	T	A	0.0418	-0.2834	0.06299	3657	7.04693e-06	20.2366
IgD+ CD24+ B cell %B cell	rs9369326	6	42013868	C	T	0.3121	-0.1237	0.02675	3657	3.92103e-06	21.3783
IgD+ CD24+ B cell %B cell	rs7457479	7	66493985	C	T	0.2762	-0.1289	0.02875	3657	7.625e-06	20.0961
IgD+ CD24+ B cell %B cell	rs62562996	9	21576571	A	G	0.0172	-0.4312	0.09145	3657	2.51102e-06	22.2265
IgD+ CD24+ B cell %B cell	rs112570989	12	2866164	T	C	0.0149	-0.4808	0.1031	3657	3.23601e-06	21.7417
IgD+ CD24+ B cell %B cell	rs12874404	13	108993494	G	A	0.3257	0.1313	0.027	3657	1.20301e-06	23.6419
IgD+ CD24+ B cell %B cell	rs7988851	13	51367583	T	C	0.3266	-0.1353	0.02683	3657	4.79204e-07	25.4235
IgD+ CD24+ B cell %B cell	rs76477280	13	50147180	G	A	0.0206	0.4747	0.08918	3657	1.07999e-07	28.326
IgD+ CD24+ B cell %B cell	rs145371905	13	70325772	T	G	0.0194	0.4126	0.09065	3657	5.50402e-06	20.7111
IgD+ CD24+ B cell %B cell	rs77762131	14	96205838	C	G	0.045	0.2816	0.05855	3657	1.567e-06	23.1256
IgD+ CD24+ B cell %B cell	rs78269238	14	65673804	T	C	0.0582	0.2453	0.05457	3657	7.14595e-06	20.2008
IgD+ CD24+ B cell %B cell	rs35130455	14	93256694	A	T	0.704	-0.1204	0.02707	3657	9.00306e-06	19.7769
IgD+ CD24+ B cell %B cell	rs17256322	16	4127619	A	T	0.3234	0.1207	0.02634	3657	4.73097e-06	20.9925
IgD+ CD24+ B cell %B cell	rs144479315	18	23575118	T	A	0.0418	0.2862	0.06339	3657	6.54395e-06	20.3788
IgD+ CD24+ B cell Absolute Count	rs7586359	2	237195419	G	T	0.8907	-0.1868	0.03837	3656	1.16899e-06	23.6947
IgD+ CD24+ B cell Absolute Count	rs10513789	3	182760073	G	T	0.2261	0.1323	0.0295	3656	7.519e-06	20.1074
IgD+ CD24+ B cell Absolute Count	rs13132141	4	156739300	A	G	0.6385	-0.1191	0.02557	3656	3.304e-06	21.6892
IgD+ CD24+ B cell Absolute Count	rs147556975	5	148456360	T	C	0.039	-0.3012	0.06251	3656	1.508e-06	23.2109
IgD+ CD24+ B cell Absolute Count	rs4702913	5	4700587	C	A	0.9123	0.197	0.04215	3656	3.07999e-06	21.8383
IgD+ CD24+ B cell Absolute Count	rs10942726	5	74257985	G	A	0.3155	0.1176	0.02628	3656	7.85507e-06	20.0191
IgD+ CD24+ B cell Absolute Count	rs144607178	7	63248560	T	C	0.0636	0.2175	0.0491	3656	9.7089e-06	19.6172
IgD+ CD24+ B cell Absolute Count	rs10749417	10	85446387	T	A	0.2247	-0.1304	0.02887	3656	6.46606e-06	20.3959
IgD+ CD24+ B cell Absolute Count	rs11047113	12	23968609	C	A	0.1027	-0.1831	0.04029	3656	5.67296e-06	20.6473
IgD+ CD24+ B cell Absolute Count	rs183466766	13	108710731	A	G	0.0402	0.3121	0.06005	3656	2.14299e-07	27.0049
IgD+ CD24+ B cell Absolute Count	rs139981802	13	108488351	C	T	0.0418	0.3005	0.05978	3656	5.22998e-07	25.2615
IgD+ CD24+ B cell Absolute Count	rs557577736	13	46224092	G	A	0.001	1.819	0.3815	3656	1.91898e-06	22.7278
IgD+ CD24+ B cell Absolute Count	rs145371905	13	70325772	T	G	0.0194	0.4292	0.08767	3656	1.02101e-06	23.9606
IgD+ CD24+ B cell Absolute Count	rs9314892	13	114873368	G	A	0.8553	-0.1608	0.03478	3656	3.926e-06	21.3695
IgD+ CD24+ B cell Absolute Count	rs12874404	13	108993494	G	A	0.3256	0.1963	0.02601	3656	5.61824e-14	56.9431
IgD+ CD24+ B cell Absolute Count	rs73192651	13	50212885	T	C	0.02	0.4428	0.08724	3656	4.05005e-07	25.7552
IgD+ CD24+ B cell Absolute Count	rs8014978	14	94936964	C	T	0.5737	-0.1136	0.02446	3656	3.565e-06	21.5638
IgD+ CD24+ B cell Absolute Count	rs77762131	14	96205838	C	G	0.045	0.291	0.05685	3656	3.22404e-07	26.1943
IgD+ CD24+ B cell Absolute Count	rs12595433	15	63290645	A	G	0.4579	-0.1118	0.02462	3656	5.79696e-06	20.6153
IgD+ CD24+ B cell Absolute Count	rs880312	16	8963501	A	G	0.1034	-0.1821	0.03971	3656	4.67897e-06	21.0233
IgD+ CD24+ B cell Absolute Count	rs11653761	17	2716535	T	G	0.592	-0.125	0.02429	3656	2.83302e-07	26.4756
IgD+ CD24+ B cell Absolute Count	rs7254039	19	14993354	A	G	0.0435	-0.2566	0.05765	3656	8.81089e-06	19.806
IgD+ CD24+ B cell Absolute Count	rs9614226	22	44688150	G	T	0.9792	-0.4122	0.08546	3656	1.46501e-06	23.2579
IgD- CD24- B cell %B cell	rs111237501	1	163272701	C	T	0.003	1.055	0.2248	3657	2.813e-06	22.0188
IgD- CD24- B cell %B cell	rs11887461	2	128660247	G	A	0.4754	0.1136	0.0249	3657	5.25303e-06	20.8084
IgD- CD24- B cell %B cell	rs13020544	2	217809198	A	G	0.0004	-2.752	0.5674	3657	1.287e-06	23.5179
IgD- CD24- B cell %B cell	rs145137909	2	215618238	A	G	0.0004	-2.77	0.5672	3657	1.087e-06	23.8434
IgD- CD24- B cell %B cell	rs114209430	4	83018399	C	T	0.0085	-0.6384	0.136	3657	2.75797e-06	22.0287
IgD- CD24- B cell %B cell	rs17044633	4	113331648	G	A	0.0286	0.3561	0.07517	3657	2.256e-06	22.4355
IgD- CD24- B cell %B cell	rs183821560	5	62072324	A	G	0.0016	-1.841	0.3885	3657	2.25102e-06	22.4495
IgD- CD24- B cell %B cell	rs9398107	6	107155687	G	A	0.0555	0.2678	0.0552	3657	1.274e-06	23.5301
IgD- CD24- B cell %B cell	rs73045003	7	2651996	T	C	0.1396	-0.1605	0.03611	3657	9.03608e-06	19.7504
IgD- CD24- B cell %B cell	rs76377003	8	112881828	G	A	0.0219	-0.3971	0.08574	3657	3.76296e-06	21.4444
IgD- CD24- B cell %B cell	rs112898282	10	28462184	C	T	0.0152	0.4712	0.1007	3657	2.97201e-06	21.8893
IgD- CD24- B cell %B cell	rs7966251	12	103731395	A	G	0.1349	0.1908	0.03619	3657	1.43199e-07	27.7882
IgD- CD24- B cell %B cell	rs142305616	14	103946237	C	A	0.0148	0.466	0.1047	3657	8.83792e-06	19.8043
IgD- CD24- B cell %B cell	rs7198605	16	6107421	T	C	0.182	0.146	0.03204	3657	5.38295e-06	20.7588
IgD- CD24- B cell %B cell	rs35192093	18	29387367	T	C	0.1593	0.1597	0.03505	3657	5.36402e-06	20.7546
IgD- CD24- B cell %B cell	rs8109503	19	19073798	A	T	0.0919	-0.2029	0.04406	3657	4.27297e-06	21.201
IgD- CD24- B cell %B cell	rs6073000	20	41777449	C	T	0.959	-0.3098	0.06272	3657	8.163e-07	24.3911
IgD- CD24- B cell %B cell	rs115218594	22	27642688	A	G	0.0421	-0.2776	0.06207	3657	7.95591e-06	19.9966
IgD- CD24- B cell Absolute Count	rs72953104	1	41379583	G	C	0.0643	0.2344	0.05087	3656	4.19701e-06	21.2262
IgD- CD24- B cell Absolute Count	rs111237501	1	163272701	C	T	0.003	1.052	0.2261	3656	3.34703e-06	21.6427
IgD- CD24- B cell Absolute Count	rs114114265	2	79806712	A	G	0.0647	0.2343	0.05149	3656	5.50896e-06	20.7005
IgD- CD24- B cell Absolute Count	rs7615875	3	29345411	C	T	0.1956	0.1425	0.03201	3656	8.8481e-06	19.8125
IgD- CD24- B cell Absolute Count	rs76499400	3	191888629	T	G	0.0792	0.2069	0.04589	3656	6.76893e-06	20.322
IgD- CD24- B cell Absolute Count	rs4697616	4	25767183	A	G	0.6779	0.1246	0.02682	3656	3.53403e-06	21.5774
IgD- CD24- B cell Absolute Count	rs17044633	4	113331648	G	A	0.0286	0.3458	0.07605	3656	5.62406e-06	20.6696
IgD- CD24- B cell Absolute Count	rs76225955	4	31594004	C	T	0.0909	-0.1924	0.0432	3656	8.65506e-06	19.83
IgD- CD24- B cell Absolute Count	rs74356874	5	22936562	A	G	0.0066	0.6821	0.1488	3656	4.73598e-06	21.0074
IgD- CD24- B cell Absolute Count	rs145638783	6	1238442	A	G	0.0033	-0.9851	0.2144	3656	4.469e-06	21.1053
IgD- CD24- B cell Absolute Count	rs112898282	10	28462184	C	T	0.0152	0.4601	0.1017	3656	6.27798e-06	20.4618
IgD- CD24- B cell Absolute Count	rs75453701	13	55229646	G	A	0.0464	0.2658	0.05994	3656	9.47305e-06	19.6588
IgD- CD24- B cell Absolute Count	rs7982713	13	71376322	G	A	0.2157	-0.1482	0.03033	3656	1.068e-06	23.8689
IgD- CD24- B cell Absolute Count	rs191543445	14	31505138	G	A	0.031	0.3337	0.07236	3656	4.14295e-06	21.2616
IgD- CD24- B cell Absolute Count	rs496760	15	54695686	A	G	0.6422	0.1331	0.02656	3656	5.69102e-07	25.1062
IgD- CD24- B cell Absolute Count	rs421516	17	63135589	A	C	0.9583	-0.2921	0.06361	3656	4.54496e-06	21.0811
IgD- CD24- B cell Absolute Count	rs72977632	19	1930174	A	T	0.0643	-0.2323	0.05115	3656	5.75294e-06	20.62
IgD- CD24- B cell Absolute Count	rs451367	19	16412842	C	T	0.7674	-0.146	0.0296	3656	8.51805e-07	24.3222
IgD+ CD24- B cell %B cell	rs11184230	1	105159724	T	C	0.1095	-0.1946	0.03983	3657	1.083e-06	23.8642
IgD+ CD24- B cell %B cell	rs7412746	1	150860471	T	C	0.5153	0.1263	0.02588	3657	1.11199e-06	23.81
IgD+ CD24- B cell %B cell	rs75766272	1	8009985	T	C	0.0201	0.483	0.08768	3657	3.86002e-08	30.3371
IgD+ CD24- B cell %B cell	rs45608038	2	73679013	G	A	0.0421	-0.2927	0.06326	3657	3.85496e-06	21.4027
IgD+ CD24- B cell %B cell	rs12465275	2	4082267	C	T	0.009	-0.6051	0.136	3657	8.84199e-06	19.7905
IgD+ CD24- B cell %B cell	rs56335940	3	106579815	A	G	0.1326	-0.1728	0.03773	3657	4.83905e-06	20.9698
IgD+ CD24- B cell %B cell	rs1972883	4	47951945	A	G	0.7849	-0.1408	0.03125	3657	6.88906e-06	20.2949
IgD+ CD24- B cell %B cell	rs35698683	4	11590243	G	A	0.0447	0.2735	0.06003	3657	5.36402e-06	20.752
IgD+ CD24- B cell %B cell	rs6910508	6	166531345	A	G	0.4199	0.1159	0.0255	3657	5.71202e-06	20.6523
IgD+ CD24- B cell %B cell	rs533239981	8	75515052	C	G	0.0387	0.3029	0.06589	3657	4.42802e-06	21.1271
IgD+ CD24- B cell %B cell	rs2450220	8	119323401	T	C	0.816	-0.1439	0.03231	3657	8.69201e-06	19.8303
IgD+ CD24- B cell %B cell	rs7870388	9	8660693	G	C	0.7737	-0.142	0.03034	3657	2.97303e-06	21.8991
IgD+ CD24- B cell %B cell	rs140191306	9	2570753	T	C	0.0179	0.4404	0.09513	3657	3.804e-06	21.426
IgD+ CD24- B cell %B cell	rs145123647	10	26959594	T	C	0.003	1.016	0.2269	3657	7.67892e-06	20.0447
IgD+ CD24- B cell %B cell	rs116844769	14	65713895	A	G	0.0662	-0.2773	0.0514	3657	7.29693e-08	29.0974
IgD+ CD24- B cell %B cell	rs182854545	14	54016223	T	C	0.0018	1.363	0.3003	3657	5.84602e-06	20.595
IgD+ CD24- B cell %B cell	rs73426855	17	77637123	C	T	0.1471	-0.1632	0.03539	3657	4.13904e-06	21.2599
IgD+ CD24- B cell %B cell	rs2159343	17	49451837	G	A	0.6266	-0.1247	0.02639	3657	2.37197e-06	22.3221
IgD+ CD24- B cell %B cell	rs78958229	21	39363957	T	C	0.044	0.2723	0.06041	3657	6.74295e-06	20.3123
IgD+ CD24- B cell %B cell	rs58706313	22	44492562	T	C	0.0343	-0.3021	0.06737	3657	7.53095e-06	20.1025
IgD+ CD24- B cell Absolute Count	rs71615254	4	178658413	C	A	0.0406	-0.2989	0.06147	3656	1.21099e-06	23.6378
IgD+ CD24- B cell Absolute Count	rs17056318	5	158285953	C	T	0.081	-0.2103	0.04553	3656	3.98602e-06	21.3287
IgD+ CD24- B cell Absolute Count	rs141108367	5	21916806	A	G	0.0012	1.503	0.3297	3656	5.30506e-06	20.776
IgD+ CD24- B cell Absolute Count	rs115150472	5	146138788	T	C	0.0004	2.619	0.5765	3656	5.73099e-06	20.6326
IgD+ CD24- B cell Absolute Count	rs12197153	6	100821460	A	G	0.0007	2.118	0.4501	3656	2.63099e-06	22.1368
IgD+ CD24- B cell Absolute Count	rs9354413	6	67039330	C	T	0.2964	0.138	0.02729	3656	4.42099e-07	25.5642
IgD+ CD24- B cell Absolute Count	rs143397127	7	12847391	C	T	0.0157	-0.4464	0.09885	3656	6.50999e-06	20.3881
IgD+ CD24- B cell Absolute Count	rs190448231	7	87868543	G	T	0.028	0.3363	0.07548	3656	8.64908e-06	19.8459
IgD+ CD24- B cell Absolute Count	rs34910780	7	77469688	T	A	0.048	-0.2677	0.05716	3656	2.94198e-06	21.9277
IgD+ CD24- B cell Absolute Count	rs2395904	8	130617819	G	T	0.2657	-0.1335	0.0275	3656	1.26e-06	23.5602
IgD+ CD24- B cell Absolute Count	rs150663332	8	2044843	T	C	0.084	-0.2005	0.04387	3656	5.02597e-06	20.8821
IgD+ CD24- B cell Absolute Count	rs117190494	8	75563339	A	G	0.022	0.4148	0.08139	3656	3.642e-07	25.9667
IgD+ CD24- B cell Absolute Count	rs701839	10	102955294	G	A	0.7124	0.1269	0.02791	3656	5.63106e-06	20.6673
IgD+ CD24- B cell Absolute Count	rs189761842	10	125485345	T	C	0.0055	0.7675	0.1702	3656	6.72404e-06	20.3291
IgD+ CD24- B cell Absolute Count	rs12799241	11	119980729	A	G	0.2619	0.132	0.02794	3656	2.391e-06	22.3139
IgD+ CD24- B cell Absolute Count	rs34771848	12	14302579	T	C	0.023	-0.3693	0.08033	3656	4.43598e-06	21.1293
IgD+ CD24- B cell Absolute Count	rs76578043	13	105214810	A	G	0.0298	0.3166	0.0697	3656	5.73905e-06	20.6271
IgD+ CD24- B cell Absolute Count	rs75474045	13	72428296	A	G	0.0126	0.4915	0.1086	3656	6.24899e-06	20.4771
IgD+ CD24- B cell Absolute Count	rs3811215	14	22954777	T	G	0.3032	-0.1264	0.02685	3656	2.59801e-06	22.1558
IgD+ CD24- B cell Absolute Count	rs143176410	16	84305239	C	G	0.001	1.816	0.404	3656	7.18208e-06	20.1999
IgD+ CD24- B cell Absolute Count	rs73426855	17	77637123	C	T	0.1469	-0.1616	0.03458	3656	3.09699e-06	21.833
IgD+ CD24- B cell Absolute Count	rs77983244	17	7316027	A	G	0.0325	-0.3049	0.06682	3656	5.22902e-06	20.8153
IgD+ CD24- B cell Absolute Count	rs62067029	17	38038391	T	A	0.4148	-0.1593	0.02856	3656	2.61198e-08	31.1026
IgD+ CD24- B cell Absolute Count	rs34764986	20	59926554	C	T	0.0699	-0.2158	0.04786	3656	6.69607e-06	20.3254
CD24+ CD27+ B cell %B cell	rs145208372	1	83678678	A	G	0.0097	-0.56	0.1234	3657	5.91003e-06	20.5886
CD24+ CD27+ B cell %B cell	rs7412746	1	150860471	T	C	0.5153	-0.1301	0.02547	3657	3.41099e-07	26.0842
CD24+ CD27+ B cell %B cell	rs72758947	1	207087053	G	A	0.0641	-0.2365	0.05101	3657	3.67401e-06	21.4898
CD24+ CD27+ B cell %B cell	rs4658141	1	89814066	C	T	0.3805	-0.1269	0.02592	3657	1.009e-06	23.9626
CD24+ CD27+ B cell %B cell	rs75766272	1	8009985	T	C	0.0201	-0.4865	0.08656	3657	2.04899e-08	31.58
CD24+ CD27+ B cell %B cell	rs72944931	2	178116262	G	A	0.0138	0.4657	0.1052	3657	9.91791e-06	19.5913
CD24+ CD27+ B cell %B cell	rs45608038	2	73679013	G	A	0.0421	0.3527	0.0624	3657	1.71002e-08	31.9391
CD24+ CD27+ B cell %B cell	rs72844588	2	138420154	A	G	0.0913	0.2066	0.04322	3657	1.826e-06	22.844
CD24+ CD27+ B cell %B cell	rs62233948	3	7831627	T	C	0.006	-0.737	0.1643	3657	7.48101e-06	20.116
CD24+ CD27+ B cell %B cell	rs145442262	3	186702869	A	G	0.0906	-0.2083	0.04276	3657	1.15001e-06	23.7238
CD24+ CD27+ B cell %B cell	rs55710170	3	16416145	A	G	0.1181	-0.1708	0.03788	3657	6.70595e-06	20.3253
CD24+ CD27+ B cell %B cell	rs35698683	4	11590243	G	A	0.0447	-0.293	0.05931	3657	8.17504e-07	24.3984
CD24+ CD27+ B cell %B cell	rs115405874	5	119742816	G	A	0.0037	0.9325	0.2017	3657	3.925e-06	21.3682
CD24+ CD27+ B cell %B cell	rs681014	5	140636323	C	T	0.9966	0.9614	0.207	3657	3.52298e-06	21.565
CD24+ CD27+ B cell %B cell	rs9492229	6	129409652	C	T	0.9556	0.2715	0.06115	3657	9.27705e-06	19.7073
CD24+ CD27+ B cell %B cell	rs148702078	6	100574892	C	G	0.0034	0.9264	0.2067	3657	7.59906e-06	20.0816
CD24+ CD27+ B cell %B cell	rs62459310	7	56242182	C	G	0.022	0.3676	0.08119	3657	6.15205e-06	20.494
CD24+ CD27+ B cell %B cell	rs10505439	8	124662104	T	C	0.0941	-0.1852	0.04175	3657	9.38102e-06	19.6721
CD24+ CD27+ B cell %B cell	rs10743163	11	11033950	A	G	0.4035	-0.1205	0.02541	3657	2.20699e-06	22.4826
CD24+ CD27+ B cell %B cell	rs265612	12	130112732	T	C	0.3411	0.1143	0.02575	3657	9.29608e-06	19.6979
CD24+ CD27+ B cell %B cell	rs112294465	12	123744082	A	C	0.0021	1.249	0.2784	3657	7.44098e-06	20.1218
CD24+ CD27+ B cell %B cell	rs76477280	13	50147180	G	A	0.0206	0.4892	0.08811	3657	3.02803e-08	30.8179
CD24+ CD27+ B cell %B cell	rs117004076	14	97702226	G	A	0.0146	0.4553	0.1022	3657	8.56091e-06	19.8415
CD24+ CD27+ B cell %B cell	rs77762131	14	96205838	C	G	0.045	0.2675	0.05828	3657	4.59896e-06	21.0615
CD24+ CD27+ B cell %B cell	rs116844769	14	65713895	A	G	0.0662	0.2482	0.05078	3657	1.064e-06	23.8836
CD24+ CD27+ B cell %B cell	rs7221794	17	76979729	A	G	0.1574	-0.1563	0.03395	3657	4.29903e-06	21.1894
CD24+ CD27+ B cell Absolute Count	rs75766272	1	8009985	T	C	0.0201	-0.4055	0.08609	3656	2.56998e-06	22.1798
CD24+ CD27+ B cell Absolute Count	rs16867231	2	181050023	A	G	0.0108	0.5129	0.1154	3656	8.98008e-06	19.7485
CD24+ CD27+ B cell Absolute Count	rs79207264	3	96406408	A	G	0.1184	0.1752	0.0393	3656	8.46603e-06	19.8685
CD24+ CD27+ B cell Absolute Count	rs7640784	3	176029498	A	C	0.4714	-0.1111	0.02476	3656	7.47894e-06	20.1283
CD24+ CD27+ B cell Absolute Count	rs149085540	4	110550623	T	C	0.0167	-0.4318	0.09574	3656	6.66807e-06	20.3357
CD24+ CD27+ B cell Absolute Count	rs17708396	5	148410250	A	C	0.0005	2.539	0.5201	3656	1.09499e-06	23.825
CD24+ CD27+ B cell Absolute Count	rs10942726	5	74257985	G	A	0.3155	0.1188	0.02672	3656	8.92504e-06	19.7625
CD24+ CD27+ B cell Absolute Count	rs35057381	5	26412301	C	T	0.2211	0.1344	0.02969	3656	6.17703e-06	20.4861
CD24+ CD27+ B cell Absolute Count	rs56033406	6	41084740	T	C	0.0349	0.312	0.06692	3656	3.22901e-06	21.7309
CD24+ CD27+ B cell Absolute Count	rs4076316	6	167859623	A	T	0.3005	-0.1404	0.02729	3656	2.83798e-07	26.4611
CD24+ CD27+ B cell Absolute Count	rs144625305	7	7871676	T	C	0.0086	0.6162	0.1357	3656	5.74804e-06	20.6141
CD24+ CD27+ B cell Absolute Count	rs184496770	8	124255582	T	C	0.0021	1.162	0.2608	3656	8.56091e-06	19.8462
CD24+ CD27+ B cell Absolute Count	rs118092259	8	89432719	G	T	0.0414	-0.2901	0.06345	3656	4.97898e-06	20.8984
CD24+ CD27+ B cell Absolute Count	rs10759006	9	8855603	C	T	0.6198	0.1133	0.02556	3656	9.50692e-06	19.6435
CD24+ CD27+ B cell Absolute Count	rs10762541	10	53790461	T	C	0.772	0.1488	0.02978	3656	6.08695e-07	24.9596
CD24+ CD27+ B cell Absolute Count	rs138329462	12	11634360	A	G	0.0174	-0.4374	0.09365	3656	3.10799e-06	21.8084
CD24+ CD27+ B cell Absolute Count	rs557577736	13	46224092	G	A	0.001	1.818	0.3878	3656	2.869e-06	21.9712
CD24+ CD27+ B cell Absolute Count	rs12874404	13	108993494	G	A	0.3256	0.1691	0.02653	3656	2.04202e-10	40.6157
CD24+ CD27+ B cell Absolute Count	rs73192651	13	50212885	T	C	0.02	0.4411	0.08893	3656	7.38193e-07	24.5957
CD24+ CD27+ B cell Absolute Count	rs76552872	13	70167316	T	G	0.042	0.283	0.06219	3656	5.54102e-06	20.702
CD24+ CD27+ B cell Absolute Count	rs77762131	14	96205838	C	G	0.045	0.2815	0.05774	3656	1.12699e-06	23.7621
CD24+ CD27+ B cell Absolute Count	rs11653761	17	2716535	T	G	0.592	-0.118	0.0247	3656	1.84001e-06	22.8166
CD24+ CD27+ B cell Absolute Count	rs11649808	17	62258665	A	G	0.8487	0.1546	0.03472	3656	8.74802e-06	19.8217
CD24+ CD27+ B cell Absolute Count	rs7254039	19	14993354	A	G	0.0435	-0.2606	0.0585	3656	8.63794e-06	19.8389
CD24+ CD27+ B cell Absolute Count	rs728776	22	45400116	G	A	0.121	-0.1712	0.03808	3656	7.09006e-06	20.2067
CD24+ CD27+ B cell Absolute Count	rs144295598	22	45164171	A	G	0.0103	0.5664	0.1203	3656	2.59902e-06	22.1614
CD20- B cell %B cell	rs529500582	1	11620068	A	G	0.0254	-0.4047	0.08262	3658	1.009e-06	23.9871
CD20- B cell %B cell	rs187723151	1	242186219	A	G	0.004	-0.9447	0.1934	3658	1.07999e-06	23.8537
CD20- B cell %B cell	rs112180455	2	221466858	T	C	0.0299	0.3316	0.07326	3658	6.19598e-06	20.4822
CD20- B cell %B cell	rs58352426	3	154090291	A	G	0.2246	0.1401	0.02947	3658	2.07998e-06	22.5942
CD20- B cell %B cell	rs75951284	3	187638796	T	C	0.0316	0.3083	0.06752	3658	5.11105e-06	20.8432
CD20- B cell %B cell	rs74786971	4	90909176	C	G	0.0645	0.2235	0.04952	3658	6.60602e-06	20.3646
CD20- B cell %B cell	rs316122	5	93014071	C	G	0.0372	0.2993	0.06479	3658	3.971e-06	21.3343
CD20- B cell %B cell	rs9270911	6	32572202	T	C	0.6083	0.1364	0.02871	3658	2.10499e-06	22.5654
CD20- B cell %B cell	rs9477367	6	17249496	C	T	0.9097	-0.1917	0.04273	3658	7.45899e-06	20.1215
CD20- B cell %B cell	rs111761453	7	137173666	T	G	0.0524	0.2453	0.05506	3658	8.59904e-06	19.8428
CD20- B cell %B cell	rs75368642	7	150969808	T	C	0.073	0.2118	0.04687	3658	6.41904e-06	20.4147
CD20- B cell %B cell	rs7875273	9	9023522	C	T	0.3779	0.1137	0.02506	3658	5.83002e-06	20.5797
CD20- B cell %B cell	rs118084343	11	17687837	G	A	0.0547	-0.2663	0.0544	3658	1.02901e-06	23.9566
CD20- B cell %B cell	rs3885787	12	92375948	C	A	0.9422	0.2407	0.05303	3658	5.84494e-06	20.5963
CD20- B cell %B cell	rs4244568	15	39319915	G	T	0.3414	-0.1233	0.02622	3658	2.67399e-06	22.1076
CD20- B cell %B cell	rs140134875	15	80306120	A	C	0.0011	-1.694	0.3528	3658	1.639e-06	23.0489
CD20- B cell %B cell	rs4889373	16	81747602	G	A	0.7989	-0.1372	0.03051	3658	7.06399e-06	20.2165
CD20- B cell %B cell	rs2107459	16	74140113	A	C	0.0853	0.2021	0.04383	3658	4.17503e-06	21.2555
CD20- B cell %B cell	rs7265879	20	6103341	G	C	0.0778	-0.2182	0.04616	3658	2.35798e-06	22.3388
CD20- B cell %B cell	rs57840701	20	46686437	C	A	0.015	0.4562	0.1004	3658	5.65002e-06	20.6407
IgD- CD38+ B cell Absolute Count	rs115156019	1	168227395	T	C	0.0081	-0.6197	0.1242	3656	6.33199e-07	24.8886
IgD- CD38+ B cell Absolute Count	rs2792563	1	213100225	A	G	0.5671	-0.108	0.02437	3656	9.59909e-06	19.6344
IgD- CD38+ B cell Absolute Count	rs138158989	2	204476635	A	G	0.0018	-1.339	0.2832	3656	2.33099e-06	22.3489
IgD- CD38+ B cell Absolute Count	rs114044800	2	237823477	C	G	0.0086	0.5637	0.1259	3656	7.81592e-06	20.0413
IgD- CD38+ B cell Absolute Count	rs148362575	2	187165335	T	A	0.0008	2.541	0.5292	3656	1.64101e-06	23.0489
IgD- CD38+ B cell Absolute Count	rs66491584	3	20980398	A	G	0.1991	-0.1466	0.02957	3656	7.43293e-07	24.5723
IgD- CD38+ B cell Absolute Count	rs141490841	3	149265655	A	G	0.02	0.3828	0.08506	3656	6.98506e-06	20.2476
IgD- CD38+ B cell Absolute Count	rs62353585	4	168102710	C	T	0.0227	0.3438	0.07709	3656	8.48301e-06	19.8837
IgD- CD38+ B cell Absolute Count	rs3105149	5	36474634	T	A	0.0239	0.3462	0.07754	3656	8.27409e-06	19.9289
IgD- CD38+ B cell Absolute Count	rs78678130	7	105792831	A	G	0.1076	-0.1707	0.03819	3656	8.03193e-06	19.9733
IgD- CD38+ B cell Absolute Count	rs138058221	7	132571443	T	C	0.0068	-0.6658	0.1449	3656	4.47497e-06	21.1073
IgD- CD38+ B cell Absolute Count	rs10815908	9	8537763	T	G	0.0511	0.2526	0.0538	3656	2.75797e-06	22.0386
IgD- CD38+ B cell Absolute Count	rs912755	10	7484185	C	G	0.9996	-2.494	0.5255	3656	2.16202e-06	22.5179
IgD- CD38+ B cell Absolute Count	rs11605946	11	19547027	A	G	0.1637	0.1457	0.03191	3656	5.15905e-06	20.8423
IgD- CD38+ B cell Absolute Count	rs79801395	11	97756814	C	G	0.0799	0.1973	0.04374	3656	6.68606e-06	20.3413
IgD- CD38+ B cell Absolute Count	rs478251	11	127827727	C	A	0.1332	0.1689	0.03431	3656	8.85503e-07	24.227
IgD- CD38+ B cell Absolute Count	rs147319637	11	111211623	A	G	0.0094	-0.5657	0.1224	3656	3.92401e-06	21.3546
IgD- CD38+ B cell Absolute Count	rs11609248	12	14317207	G	A	0.1916	-0.1355	0.03014	3656	7.11295e-06	20.2057
IgD- CD38+ B cell Absolute Count	rs17037450	12	106098314	A	G	0.0264	-0.3311	0.07236	3656	4.90501e-06	20.9316
IgD- CD38+ B cell Absolute Count	rs2075365	12	31092966	A	G	0.6518	-0.1142	0.02477	3656	4.14801e-06	21.2501
IgD- CD38+ B cell Absolute Count	rs74011406	15	47631034	A	G	0.093	0.1928	0.04113	3656	2.869e-06	21.9674
IgD- CD38+ B cell Absolute Count	rs72834736	16	81821361	C	G	0.0248	0.3465	0.07762	3656	8.30501e-06	19.9223
CD20- B cell Absolute Count	rs6712095	2	205623497	T	G	0.0246	0.3592	0.07943	3657	6.32499e-06	20.4449
CD20- B cell Absolute Count	rs57641238	2	75536553	C	G	0.2252	-0.1546	0.02937	3657	1.47999e-07	27.7008
CD20- B cell Absolute Count	rs34625183	3	146097919	T	C	0.1154	-0.1694	0.03789	3657	8.03397e-06	19.9829
CD20- B cell Absolute Count	rs36123742	3	133253719	T	A	0.6555	0.1193	0.02587	3657	4.11396e-06	21.2603
CD20- B cell Absolute Count	rs74786971	4	90909176	C	G	0.0645	0.2348	0.04935	3657	2.031e-06	22.631
CD20- B cell Absolute Count	rs116699251	5	142419461	A	G	0.0446	-0.2732	0.05861	3657	3.24399e-06	21.722
CD20- B cell Absolute Count	rs41494	5	9688280	T	A	0.999	1.728	0.3819	3657	6.26397e-06	20.4677
CD20- B cell Absolute Count	rs7773849	6	128553518	G	A	0.0018	1.508	0.2808	3657	8.31209e-08	28.833
CD20- B cell Absolute Count	rs9273241	6	32614025	T	C	0.5975	0.177	0.03455	3657	3.17001e-07	26.2381
CD20- B cell Absolute Count	rs2102662	7	56828069	A	G	0.7447	0.1274	0.02877	3657	9.77507e-06	19.6038
CD20- B cell Absolute Count	rs111761453	7	137173666	T	G	0.0524	0.249	0.05482	3657	5.77006e-06	20.6254
CD20- B cell Absolute Count	rs38182	7	15900650	T	C	0.1693	-0.1541	0.03305	3657	3.21203e-06	21.7342
CD20- B cell Absolute Count	rs6586822	8	19139514	C	T	0.6508	-0.1182	0.02568	3657	4.34901e-06	21.18
CD20- B cell Absolute Count	rs6482467	10	25320223	G	A	0.3646	-0.1128	0.02546	3657	9.72098e-06	19.6238
CD20- B cell Absolute Count	rs16936840	11	19531128	T	C	0.102	0.1881	0.04049	3657	3.49897e-06	21.5756
CD20- B cell Absolute Count	rs2212443	11	88131197	G	T	0.8048	-0.1412	0.03117	3657	6.07799e-06	20.5153
CD20- B cell Absolute Count	rs12146943	13	21076875	A	G	0.3704	-0.1127	0.02495	3657	6.50594e-06	20.398
CD20- B cell Absolute Count	rs77553819	13	24882401	C	G	0.2863	-0.1249	0.0269	3657	3.51901e-06	21.5527
CD20- B cell Absolute Count	rs71431666	14	95266847	C	G	0.0946	-0.1932	0.04158	3657	3.49398e-06	21.5837
CD20- B cell Absolute Count	rs252298	16	29232967	A	G	0.5643	0.1091	0.02419	3657	6.60998e-06	20.3357
CD20- B cell Absolute Count	rs56736306	16	87840577	G	C	0.1719	-0.1465	0.03231	3657	5.91602e-06	20.5533
CD20- B cell Absolute Count	rs2637364	17	32078878	C	T	0.6221	-0.1164	0.02513	3657	3.75301e-06	21.4488
CD20- B cell Absolute Count	rs6029245	20	39267990	C	T	0.0358	0.3071	0.06585	3657	3.23102e-06	21.7435
CD20- B cell Absolute Count	rs6052993	20	4944838	G	C	0.4371	-0.1123	0.0246	3657	5.17095e-06	20.8339
CD20- B cell Absolute Count	rs6008703	22	48837650	C	G	0.3131	-0.1147	0.02589	3657	9.67409e-06	19.622
CD20- CD38- B cell %B cell	rs75839951	2	34491589	G	T	0.0585	-0.2476	0.05192	3659	1.92801e-06	22.736
CD20- CD38- B cell %B cell	rs4832496	2	17752538	A	G	0.236	0.127	0.02814	3659	6.54305e-06	20.3629
CD20- CD38- B cell %B cell	rs141595421	3	63492195	G	T	0.0127	-0.4902	0.11	3659	8.62303e-06	19.8537
CD20- CD38- B cell %B cell	rs396692	4	163553861	A	G	0.6682	0.1157	0.02552	3659	5.99998e-06	20.5488
CD20- CD38- B cell %B cell	rs182720746	4	113092883	T	C	0.0089	0.6255	0.1314	3659	2.014e-06	22.654
CD20- CD38- B cell %B cell	rs2215848	4	25065221	A	G	0.0118	0.524	0.1121	3659	3.06902e-06	21.844
CD20- CD38- B cell %B cell	rs62311900	4	74145187	T	C	0.1735	-0.1398	0.03159	3659	9.85598e-06	19.5793
CD20- CD38- B cell %B cell	rs2339996	5	173070505	A	G	0.7803	-0.1471	0.0287	3659	3.11602e-07	26.2629
CD20- CD38- B cell %B cell	rs13176237	5	42353044	G	A	0.0696	0.2113	0.04756	3659	9.12494e-06	19.7332
CD20- CD38- B cell %B cell	rs72492305	6	32509333	T	C	0.6663	0.2125	0.04192	3659	4.18803e-07	25.6896
CD20- CD38- B cell %B cell	rs56284619	6	90013983	T	C	0.1469	0.1557	0.03428	3659	5.72005e-06	20.6242
CD20- CD38- B cell %B cell	rs10988372	9	132193568	C	G	0.2044	0.1351	0.02998	3659	6.77002e-06	20.3015
CD20- CD38- B cell %B cell	rs118073973	9	19948908	A	T	0.0402	0.2799	0.06148	3659	5.45306e-06	20.7214
CD20- CD38- B cell %B cell	rs72652459	9	22099416	T	C	0.0012	-1.505	0.3389	3659	9.20005e-06	19.7157
CD20- CD38- B cell %B cell	rs55767134	10	17048435	C	G	0.1838	-0.1463	0.03122	3659	2.90202e-06	21.9535
CD20- CD38- B cell %B cell	rs34666228	11	123385425	T	G	0.2346	0.1355	0.02809	3659	1.45902e-06	23.2625
CD20- CD38- B cell %B cell	rs78301150	12	82233392	A	G	0.0033	-1.069	0.2213	3659	1.42099e-06	23.3278
CD20- CD38- B cell %B cell	rs55897487	12	261706	T	C	0.0016	-1.342	0.2897	3659	3.73104e-06	21.4531
CD20- CD38- B cell %B cell	rs117308259	14	31993501	C	T	0.0066	-0.8348	0.1494	3659	2.48199e-08	31.2137
CD20- CD38- B cell %B cell	rs17099538	14	33254318	C	T	0.0559	-0.2409	0.05156	3659	3.093e-06	21.8237
CD20- CD38- B cell %B cell	rs77911577	14	28669022	C	A	0.05	-0.2551	0.05732	3659	8.78598e-06	19.8011
CD20- CD38- B cell %B cell	rs2113943	15	60895636	G	A	0.2288	0.1278	0.02875	3659	9.10395e-06	19.7546
CD20- CD38- B cell %B cell	rs35639639	16	5488091	C	T	0.2062	0.1332	0.0299	3659	8.60399e-06	19.8403
CD20- CD38- B cell %B cell	rs16955339	17	52971060	T	G	0.0377	0.293	0.06221	3659	2.56803e-06	22.1767
CD20- CD38- B cell %B cell	rs36071180	20	765164	A	G	0.1596	0.1488	0.03329	3659	8.077e-06	19.9737
CD20- CD38- B cell %B cell	rs6125184	20	46576714	A	G	0.5914	-0.1186	0.02463	3659	1.547e-06	23.1804
CD20- CD38- B cell Absolute Count	rs182720746	4	113092883	T	C	0.0089	0.6026	0.1323	3658	5.38096e-06	20.7405
CD20- CD38- B cell Absolute Count	rs62311900	4	74145187	T	C	0.1736	-0.1537	0.03175	3658	1.33801e-06	23.4283
CD20- CD38- B cell Absolute Count	rs2339996	5	173070505	A	G	0.7802	-0.1438	0.02887	3658	6.60496e-07	24.8031
CD20- CD38- B cell Absolute Count	rs72492305	6	32509333	T	C	0.6662	0.2112	0.04169	3658	4.25402e-07	25.657
CD20- CD38- B cell Absolute Count	rs6906886	6	85038851	A	T	0.903	0.1893	0.04063	3658	3.29299e-06	21.7015
CD20- CD38- B cell Absolute Count	rs11203884	8	17516564	T	C	0.1643	-0.1548	0.03269	3658	2.26898e-06	22.4178
CD20- CD38- B cell Absolute Count	rs10988372	9	132193568	C	G	0.2045	0.139	0.03012	3658	4.08602e-06	21.2912
CD20- CD38- B cell Absolute Count	rs118073973	9	19948908	A	T	0.0402	0.2899	0.06184	3658	2.87303e-06	21.9704
CD20- CD38- B cell Absolute Count	rs75609575	11	97639659	A	G	0.0349	-0.3072	0.06608	3658	3.45096e-06	21.6065
CD20- CD38- B cell Absolute Count	rs308820	11	88142031	C	T	0.7571	-0.1305	0.02844	3658	4.63095e-06	21.0496
CD20- CD38- B cell Absolute Count	rs61906277	11	123384801	G	A	0.2347	0.1435	0.02825	3658	3.99098e-07	25.7957
CD20- CD38- B cell Absolute Count	rs117308259	14	31993501	C	T	0.0066	-0.6917	0.1504	3658	4.39896e-06	21.1457
CD20- CD38- B cell Absolute Count	rs16955339	17	52971060	T	G	0.0377	0.3095	0.06249	3658	7.67397e-07	24.5234
CD20- CD38- B cell Absolute Count	rs77510701	18	34838106	A	C	0.0484	-0.2548	0.05651	3658	6.74e-06	20.3249
CD20- CD38- B cell Absolute Count	rs80339814	19	53396009	C	T	0.0794	-0.2131	0.04766	3658	8.02306e-06	19.9867
CD20- CD38- B cell Absolute Count	rs6125184	20	46576714	A	G	0.5914	-0.1099	0.02479	3658	9.59599e-06	19.6482
CD20- CD38- B cell Absolute Count	rs36071180	20	765164	A	G	0.1597	0.1498	0.03344	3658	7.69892e-06	20.0619
IgD+ B cell %Lymphocyte	rs143109147	1	40387371	C	T	0.0004	2.746	0.5892	3657	3.27198e-06	21.7148
IgD+ B cell %Lymphocyte	rs16837671	2	206655953	G	T	0.0494	-0.2827	0.05702	3657	7.43207e-07	24.5741
IgD+ B cell %Lymphocyte	rs141070091	4	46715880	T	G	0.0081	0.614	0.1364	3657	6.96803e-06	20.2577
IgD+ B cell %Lymphocyte	rs76845048	5	115785493	C	A	0.0357	-0.3021	0.06594	3657	4.76299e-06	20.9838
IgD+ B cell %Lymphocyte	rs4361609	6	31240635	C	G	0.1131	-0.2101	0.04223	3657	6.78297e-07	24.7452
IgD+ B cell %Lymphocyte	rs73078428	7	20106029	A	T	0.1318	-0.1651	0.03606	3657	4.854e-06	20.9567
IgD+ B cell %Lymphocyte	rs111830700	7	121332400	A	G	0.0377	0.2879	0.06309	3657	5.202e-06	20.8182
IgD+ B cell %Lymphocyte	rs34910780	7	77469688	T	A	0.0481	-0.2739	0.05642	3657	1.25101e-06	23.5613
IgD+ B cell %Lymphocyte	rs2395904	8	130617819	G	T	0.2657	-0.1285	0.02712	3657	2.243e-06	22.4444
IgD+ B cell %Lymphocyte	rs533239981	8	75515052	C	G	0.0387	0.2839	0.06355	3657	8.16e-06	19.9517
IgD+ B cell %Lymphocyte	rs1977295	10	7188484	A	G	0.5273	0.1101	0.02357	3657	3.11401e-06	21.8141
IgD+ B cell %Lymphocyte	rs75319860	12	110312229	C	T	0.0249	0.3546	0.0787	3657	6.84101e-06	20.2959
IgD+ B cell %Lymphocyte	rs116906133	13	100023905	G	A	0.0037	-1.032	0.2178	3657	2.22398e-06	22.4453
IgD+ B cell %Lymphocyte	rs12874404	13	108993494	G	A	0.3257	0.1898	0.02599	3657	3.43084e-13	53.3164
IgD+ B cell %Lymphocyte	rs2402519	14	95373465	C	G	0.1523	0.1596	0.03359	3657	2.10402e-06	22.5698
IgD+ B cell %Lymphocyte	rs11657531	17	2731370	T	C	0.4882	-0.1468	0.0236	3657	5.52497e-10	38.682
IgD+ B cell %Lymphocyte	rs12939565	17	38038389	T	A	0.4267	-0.142	0.02747	3657	2.45499e-07	26.7141
IgD+ B cell %Lymphocyte	rs75956343	17	70210257	G	A	0.0469	-0.2576	0.05786	3657	8.75407e-06	19.816
IgD+ B cell %Lymphocyte	rs55658072	19	14873284	G	A	0.6218	0.1165	0.02499	3657	3.23601e-06	21.727
IgD+ B cell %Lymphocyte	rs6131010	20	44724305	G	A	0.6172	-0.1212	0.02568	3657	2.47098e-06	22.2688
IgD- CD38+ B cell %lymphocyte	rs970081	1	213101844	A	G	0.6517	-0.1191	0.02482	3656	1.64801e-06	23.0198
IgD- CD38+ B cell %lymphocyte	rs78196740	1	63802723	C	T	0.0929	0.192	0.04079	3656	2.59998e-06	22.1501
IgD- CD38+ B cell %lymphocyte	rs148362575	2	187165335	T	A	0.0008	2.567	0.5384	3656	1.93299e-06	22.726
IgD- CD38+ B cell %lymphocyte	rs62160934	2	136941539	A	T	0.2133	0.1297	0.02865	3656	6.13098e-06	20.4886
IgD- CD38+ B cell %lymphocyte	rs138158989	2	204476635	A	G	0.0018	-1.324	0.2808	3656	2.49799e-06	22.2261
IgD- CD38+ B cell %lymphocyte	rs66491584	3	20980398	A	G	0.1991	-0.1404	0.02948	3656	1.97702e-06	22.6757
IgD- CD38+ B cell %lymphocyte	rs116540222	3	117331256	T	C	0.0011	1.619	0.361	3656	7.48204e-06	20.1076
IgD- CD38+ B cell %lymphocyte	rs79812543	3	157649504	A	G	0.0197	0.3801	0.08244	3656	4.16198e-06	21.2521
IgD- CD38+ B cell %lymphocyte	rs151009998	3	11712287	A	G	0.0379	0.2925	0.06183	3656	2.32498e-06	22.3735
IgD- CD38+ B cell %lymphocyte	rs11938966	4	55386841	A	C	0.0294	0.3028	0.06821	3656	9.29309e-06	19.7014
IgD- CD38+ B cell %lymphocyte	rs114428590	4	61089291	A	T	0.0059	-0.6902	0.1551	3656	8.88608e-06	19.7974
IgD- CD38+ B cell %lymphocyte	rs79264549	5	89585751	A	C	0.001	1.582	0.3557	3656	8.95901e-06	19.7755
IgD- CD38+ B cell %lymphocyte	rs6554754	5	1297258	C	T	0.7503	0.1238	0.0273	3656	5.91902e-06	20.5588
IgD- CD38+ B cell %lymphocyte	rs139101653	6	31274174	T	C	0.0129	-0.4998	0.1122	3656	8.62303e-06	19.8375
IgD- CD38+ B cell %lymphocyte	rs76624801	6	41935797	C	A	0.0007	-2.09	0.45	3656	3.53199e-06	21.565
IgD- CD38+ B cell %lymphocyte	rs187459109	6	40333488	A	G	0.0008	-1.987	0.4026	3656	8.31706e-07	24.3517
IgD- CD38+ B cell %lymphocyte	rs75346886	7	127285830	T	G	0.0294	0.3296	0.06986	3656	2.48199e-06	22.2535
IgD- CD38+ B cell %lymphocyte	rs138058221	7	132571443	T	C	0.0068	-0.6459	0.1447	3656	8.25791e-06	19.9193
IgD- CD38+ B cell %lymphocyte	rs148377259	7	106306631	C	T	0.0341	-0.311	0.06449	3656	1.47001e-06	23.2497
IgD- CD38+ B cell %lymphocyte	rs12340211	9	8531036	G	C	0.0518	0.2558	0.05361	3656	1.907e-06	22.761
IgD- CD38+ B cell %lymphocyte	rs113087021	11	97765784	A	T	0.0766	0.1975	0.04432	3656	8.62204e-06	19.8525
IgD- CD38+ B cell %lymphocyte	rs478251	11	127827727	C	A	0.1332	0.1561	0.03419	3656	5.11399e-06	20.8396
IgD- CD38+ B cell %lymphocyte	rs6488283	12	10496783	G	A	0.4229	-0.1069	0.02367	3656	6.50504e-06	20.3911
IgD- CD38+ B cell %lymphocyte	rs7294591	12	52932031	T	C	0.5412	0.1168	0.02391	3656	1.086e-06	23.8566
IgD- CD38+ B cell %lymphocyte	rs11609248	12	14317207	G	A	0.1916	-0.1438	0.02996	3656	1.64801e-06	23.0311
IgD- CD38+ B cell %lymphocyte	rs17037450	12	106098314	A	G	0.0264	-0.3233	0.07216	3656	7.68104e-06	20.0678
IgD- CD38+ B cell %lymphocyte	rs72686093	14	22129890	T	C	0.0382	0.2941	0.06126	3656	1.64101e-06	23.0418
IgD- CD38+ B cell %lymphocyte	rs2627305	15	74539114	A	G	0.2986	-0.1167	0.02595	3656	7.14908e-06	20.2185
IgD- CD38+ B cell %lymphocyte	rs4785074	16	59885737	T	C	0.635	-0.1289	0.02471	3656	1.91898e-07	27.2045
IgD- CD38+ B cell %lymphocyte	rs72834736	16	81821361	C	G	0.0248	0.3562	0.07723	3656	4.11604e-06	21.2665
IgD- CD38+ B cell %lymphocyte	rs76348547	22	31013921	T	G	0.0207	0.3941	0.0823	3656	1.74699e-06	22.9242
IgD- CD38dim B cell %lymphocyte	rs500586	1	41075209	T	C	0.7061	-0.1164	0.02625	3656	9.54707e-06	19.6575
IgD- CD38dim B cell %lymphocyte	rs72691171	1	119873920	T	A	0.0105	0.556	0.1242	3656	7.79902e-06	20.0349
IgD- CD38dim B cell %lymphocyte	rs143785715	1	19500582	T	C	0.0027	1.034	0.2251	3656	4.55302e-06	21.0946
IgD- CD38dim B cell %lymphocyte	rs10922490	1	89286072	C	T	0.0164	0.516	0.1044	3656	8.15793e-07	24.4219
IgD- CD38dim B cell %lymphocyte	rs11687597	2	136926146	G	A	0.2069	0.1644	0.03007	3656	4.86004e-08	29.8826
IgD- CD38dim B cell %lymphocyte	rs7595246	2	238554657	C	T	0.1893	0.1571	0.03041	3656	2.509e-07	26.6809
IgD- CD38dim B cell %lymphocyte	rs71612685	4	100279851	G	A	0.0126	0.5092	0.1088	3656	2.94002e-06	21.8978
IgD- CD38dim B cell %lymphocyte	rs1867929	4	1628280	A	C	0.1104	0.1691	0.03822	3656	9.93002e-06	19.5698
IgD- CD38dim B cell %lymphocyte	rs114839471	5	89545035	G	A	0.0005	2.925	0.6491	3656	6.80707e-06	20.3006
IgD- CD38dim B cell %lymphocyte	rs17405603	5	144608340	T	A	0.2842	-0.1275	0.02694	3656	2.27898e-06	22.3927
IgD- CD38dim B cell %lymphocyte	rs146936090	6	41401285	T	C	0.0008	1.843	0.3841	3656	1.66498e-06	23.0167
IgD- CD38dim B cell %lymphocyte	rs6972846	7	22048853	T	G	0.3885	-0.1185	0.02475	3656	1.736e-06	22.9175
IgD- CD38dim B cell %lymphocyte	rs78027513	7	154618679	T	G	0.0414	0.2746	0.05995	3656	4.77595e-06	20.9751
IgD- CD38dim B cell %lymphocyte	rs7840395	8	144984956	G	A	0.5715	-0.1408	0.02438	3656	8.25296e-09	33.3441
IgD- CD38dim B cell %lymphocyte	rs2137277	8	40734662	G	A	0.1882	0.1383	0.03071	3656	6.89096e-06	20.2752
IgD- CD38dim B cell %lymphocyte	rs72816858	10	22940992	C	G	0.0172	0.4384	0.09254	3656	2.24099e-06	22.4369
IgD- CD38dim B cell %lymphocyte	rs12298227	12	54786414	C	T	0.1013	-0.2055	0.04122	3656	6.51193e-07	24.8479
IgD- CD38dim B cell %lymphocyte	rs593370	12	53022961	T	C	0.7001	-0.1218	0.02694	3656	6.31495e-06	20.4353
IgD- CD38dim B cell %lymphocyte	rs9520836	13	108957063	G	A	0.5044	0.1281	0.02404	3656	1.05201e-07	28.3864
IgD- CD38dim B cell %lymphocyte	rs118086652	15	76646870	G	A	0.0213	0.38	0.08281	3656	4.61095e-06	21.0515
IgD- CD38dim B cell %lymphocyte	rs11653761	17	2716535	T	G	0.592	-0.1257	0.02411	3656	1.93201e-07	27.1742
IgD- CD38dim B cell %lymphocyte	rs145744014	18	61418402	T	C	0.0116	0.4981	0.1104	3656	6.63804e-06	20.3505
IgD- CD38dim B cell %lymphocyte	rs652344	19	36290177	C	T	0.2946	-0.1194	0.02653	3656	7.05196e-06	20.2495
IgD- CD38dim B cell %lymphocyte	rs2328245	20	18194427	T	C	0.5678	0.1091	0.02407	3656	6.04004e-06	20.539
IgD- CD38dim B cell %lymphocyte	rs134927	22	27421843	T	C	0.0215	0.3766	0.08299	3656	5.86206e-06	20.5869
IgD- CD38- B cell %lymphocyte	rs61790670	1	84127219	A	C	0.23	0.1517	0.02904	3656	1.83802e-07	27.2809
IgD- CD38- B cell %lymphocyte	rs116661843	1	178417994	A	G	0.0387	-0.2855	0.06453	3656	9.94695e-06	19.5691
IgD- CD38- B cell %lymphocyte	rs12128328	1	59700800	C	T	0.2113	0.1428	0.0306	3656	3.17497e-06	21.7718
IgD- CD38- B cell %lymphocyte	rs12624265	2	119468602	G	A	0.2082	0.1358	0.03024	3656	7.36902e-06	20.1612
IgD- CD38- B cell %lymphocyte	rs12992631	2	232313158	T	C	0.2408	-0.1296	0.02879	3656	6.93905e-06	20.2585
IgD- CD38- B cell %lymphocyte	rs2084194	2	47117185	A	G	0.677	-0.1193	0.02656	3656	7.21905e-06	20.17
IgD- CD38- B cell %lymphocyte	rs6723786	2	238550072	G	A	0.2924	0.1403	0.02729	3656	2.84302e-07	26.4234
IgD- CD38- B cell %lymphocyte	rs114551034	2	66709035	A	G	0.0509	-0.2723	0.05703	3656	1.86698e-06	22.7913
IgD- CD38- B cell %lymphocyte	rs75524570	3	191905058	C	T	0.0673	0.2178	0.04807	3656	6.07198e-06	20.5234
IgD- CD38- B cell %lymphocyte	rs150378941	4	133090875	C	G	0.0045	-0.853	0.1886	3656	6.27004e-06	20.4501
IgD- CD38- B cell %lymphocyte	rs72942964	4	134727496	T	C	0.0021	-1.231	0.2689	3656	4.85601e-06	20.9515
IgD- CD38- B cell %lymphocyte	rs7676571	4	56547047	T	C	0.8835	0.1731	0.0383	3656	6.40796e-06	20.421
IgD- CD38- B cell %lymphocyte	rs4697617	4	25771115	A	G	0.7103	0.1211	0.02714	3656	8.36508e-06	19.9044
IgD- CD38- B cell %lymphocyte	rs72711540	4	186920475	C	G	0.1325	-0.165	0.03688	3656	7.97003e-06	20.0109
IgD- CD38- B cell %lymphocyte	rs17405603	5	144608340	T	A	0.2842	-0.1322	0.0277	3656	1.88599e-06	22.7711
IgD- CD38- B cell %lymphocyte	rs144625305	7	7871676	T	C	0.0086	0.617	0.1366	3656	6.49696e-06	20.3962
IgD- CD38- B cell %lymphocyte	rs11777835	8	144986103	C	T	0.5715	-0.1246	0.02505	3656	6.83392e-07	24.7344
IgD- CD38- B cell %lymphocyte	rs190799514	8	55620993	C	T	0.0272	0.391	0.07669	3656	3.59104e-07	25.9871
IgD- CD38- B cell %lymphocyte	rs75116337	8	55914981	C	T	0.0208	0.3985	0.08792	3656	5.99805e-06	20.5382
IgD- CD38- B cell %lymphocyte	rs814418	8	9936753	T	C	0.0907	0.204	0.04436	3656	4.40099e-06	21.1426
IgD- CD38- B cell %lymphocyte	rs4756916	11	12544361	C	T	0.5685	-0.1119	0.02508	3656	8.39499e-06	19.9015
IgD- CD38- B cell %lymphocyte	rs17234595	11	23667143	A	G	0.0207	-0.3825	0.08604	3656	9.0261e-06	19.758
IgD- CD38- B cell %lymphocyte	rs12426629	12	54797571	G	C	0.0989	-0.1952	0.04268	3656	4.95199e-06	20.9118
IgD- CD38- B cell %lymphocyte	rs9514859	13	109144845	C	G	0.4402	0.1207	0.025	3656	1.43999e-06	23.3032
IgD- CD38- B cell %lymphocyte	rs12874404	13	108993494	G	A	0.3256	0.1408	0.02668	3656	1.378e-07	27.8429
IgD- CD38- B cell %lymphocyte	rs4474666	16	85313662	A	G	0.5167	0.1116	0.02456	3656	5.63404e-06	20.6421
IgD- CD38- B cell %lymphocyte	rs11653761	17	2716535	T	G	0.592	-0.1169	0.0249	3656	2.77997e-06	22.0349
IgD- CD38- B cell %lymphocyte	rs34157595	17	49200947	C	T	0.3155	-0.1195	0.02696	3656	9.61192e-06	19.6416
IgD- CD38- B cell %lymphocyte	rs7236090	18	60947111	C	T	0.5922	0.1163	0.02497	3656	3.33096e-06	21.6872
IgD- CD38- B cell %lymphocyte	rs77741094	21	42362418	G	C	0.0126	-0.5436	0.1119	3656	1.24e-06	23.5928
IgD- CD38dim B cell %B cell	rs112904733	1	214958496	T	G	0.0956	0.1953	0.04221	3657	3.85496e-06	21.402
IgD- CD38dim B cell %B cell	rs143109147	1	40387371	C	T	0.0004	-2.636	0.5937	3657	9.30593e-06	19.7078
IgD- CD38dim B cell %B cell	rs12118242	1	232094153	T	C	0.0055	-0.7345	0.1635	3657	7.23003e-06	20.1757
IgD- CD38dim B cell %B cell	rs9424499	1	233050029	C	G	0.0109	-0.5857	0.1138	3657	2.81002e-07	26.4818
IgD- CD38dim B cell %B cell	rs16832731	2	136864703	A	G	0.1987	0.1484	0.03147	3657	2.48599e-06	22.2308
IgD- CD38dim B cell %B cell	rs138919897	3	106834795	G	A	0.0019	-1.341	0.296	3657	6.05703e-06	20.519
IgD- CD38dim B cell %B cell	rs73205209	3	106275239	C	T	0.0334	0.3323	0.07083	3657	2.81799e-06	22.0043
IgD- CD38dim B cell %B cell	rs111854570	3	8695105	A	G	0.0388	-0.2872	0.06245	3657	4.40697e-06	21.1439
IgD- CD38dim B cell %B cell	rs114839471	5	89545035	G	A	0.0005	3.03	0.6695	3657	6.21799e-06	20.477
IgD- CD38dim B cell %B cell	rs17405749	5	144609363	T	C	0.2374	-0.1389	0.02884	3657	1.51098e-06	23.1897
IgD- CD38dim B cell %B cell	rs80088375	5	11638274	T	C	0.0247	-0.3593	0.07955	3657	6.50205e-06	20.3946
IgD- CD38dim B cell %B cell	rs75273600	6	125594743	A	G	0.0093	0.6398	0.1253	3657	3.46497e-07	26.0656
IgD- CD38dim B cell %B cell	rs849133	7	28192280	T	C	0.5576	-0.1154	0.02601	3657	9.41499e-06	19.6794
IgD- CD38dim B cell %B cell	rs146267894	9	75147206	T	C	0.0148	-0.4565	0.1023	3657	8.36296e-06	19.9073
IgD- CD38dim B cell %B cell	rs2397752	10	132983821	T	C	0.248	-0.136	0.02815	3657	1.41101e-06	23.3347
IgD- CD38dim B cell %B cell	rs117987395	10	10573290	G	T	0.0524	-0.246	0.05509	3657	8.23209e-06	19.9345
IgD- CD38dim B cell %B cell	rs80216562	11	128322602	A	G	0.029	-0.3698	0.07231	3657	3.31002e-07	26.1468
IgD- CD38dim B cell %B cell	rs10743163	11	11033950	A	G	0.4035	-0.1167	0.02529	3657	4.11396e-06	21.2875
IgD- CD38dim B cell %B cell	rs61946381	12	121343559	C	A	0.0305	0.321	0.07254	3657	9.93002e-06	19.5765
IgD- CD38dim B cell %B cell	rs1846398	12	57302799	C	A	0.7518	-0.1293	0.02904	3657	8.82308e-06	19.8191
IgD- CD38dim B cell %B cell	rs4038038	13	19499423	A	G	0.359	0.1177	0.02529	3657	3.36202e-06	21.6539
IgD- CD38dim B cell %B cell	rs117227598	15	77402748	G	C	0.0078	0.651	0.1451	3657	7.416e-06	20.1237
IgD- CD38dim B cell %B cell	rs11548656	16	81916912	G	A	0.1288	-0.1701	0.0366	3657	3.48097e-06	21.5937
IgD- CD38dim B cell %B cell	rs75659776	17	49605668	T	C	0.0515	0.2621	0.05581	3657	2.73697e-06	22.0491
IgD- CD38dim B cell %B cell	rs117541917	17	41946947	C	A	0.0593	-0.2358	0.05299	3657	8.88894e-06	19.7962
IgD- CD38dim B cell %B cell	rs113530462	20	6688542	C	G	0.0038	0.887	0.196	3657	6.221e-06	20.4746
IgD+ CD38+ B cell %lymphocyte	rs1919856	1	247700906	G	A	0.108	0.1734	0.03817	3656	5.72506e-06	20.6317
IgD+ CD38+ B cell %lymphocyte	rs11682311	2	16464977	C	T	0.3243	-0.1278	0.02599	3656	9.105e-07	24.173
IgD+ CD38+ B cell %lymphocyte	rs4907205	2	97558150	C	T	0.1232	-0.1658	0.03741	3656	9.60395e-06	19.637
IgD+ CD38+ B cell %lymphocyte	rs140380950	2	105587803	C	T	0.0368	-0.3597	0.06402	3656	2.067e-08	31.5595
IgD+ CD38+ B cell %lymphocyte	rs2686423	3	183195708	G	A	0.9739	0.3352	0.07432	3656	6.66807e-06	20.3366
IgD+ CD38+ B cell %lymphocyte	rs76112278	4	15915069	A	G	0.0194	-0.4243	0.08741	3656	1.25901e-06	23.5562
IgD+ CD38+ B cell %lymphocyte	rs7667070	4	38379833	C	T	0.0361	-0.283	0.06349	3656	8.55697e-06	19.8629
IgD+ CD38+ B cell %lymphocyte	rs78658073	5	498773	A	G	0.001	1.792	0.3659	3656	1.011e-06	23.9791
IgD+ CD38+ B cell %lymphocyte	rs80330977	5	158276610	A	G	0.0814	-0.2327	0.04501	3656	2.46598e-07	26.7212
IgD+ CD38+ B cell %lymphocyte	rs76660971	5	18919526	A	G	0.2299	-0.1368	0.02874	3656	2.02502e-06	22.6506
IgD+ CD38+ B cell %lymphocyte	rs2857599	6	31562150	A	G	0.1722	-0.1653	0.03649	3656	6.07393e-06	20.5154
IgD+ CD38+ B cell %lymphocyte	rs117772462	7	48791017	A	T	0.0159	-0.4644	0.09659	3656	1.58599e-06	23.1101
IgD+ CD38+ B cell %lymphocyte	rs11185560	7	190115	A	G	0.9375	-0.2347	0.05014	3656	2.95597e-06	21.9048
IgD+ CD38+ B cell %lymphocyte	rs10103048	8	130602281	C	A	0.7321	0.126	0.02692	3656	2.988e-06	21.9014
IgD+ CD38+ B cell %lymphocyte	rs1695681	8	118255950	A	C	0.5309	-0.1213	0.02451	3656	7.75908e-07	24.4859
IgD+ CD38+ B cell %lymphocyte	rs13300113	9	115678594	T	A	0.2789	0.1232	0.02752	3656	7.74908e-06	20.0358
IgD+ CD38+ B cell %lymphocyte	rs10821937	10	63723909	T	C	0.6458	-0.116	0.02553	3656	5.66304e-06	20.6393
IgD+ CD38+ B cell %lymphocyte	rs10832409	11	15377699	A	G	0.1722	0.1495	0.03227	3656	3.73603e-06	21.4568
IgD+ CD38+ B cell %lymphocyte	rs11068290	12	110228055	T	C	0.0231	0.3875	0.07937	3656	1.08901e-06	23.8293
IgD+ CD38+ B cell %lymphocyte	rs59879144	12	75564449	A	C	0.0161	-0.4624	0.09688	3656	1.88599e-06	22.7745
IgD+ CD38+ B cell %lymphocyte	rs10877626	12	61758121	G	C	0.4739	0.1102	0.02441	3656	6.485e-06	20.3755
IgD+ CD38+ B cell %lymphocyte	rs17408660	12	27184482	G	A	0.0129	-0.4731	0.1058	3656	7.92501e-06	19.9901
IgD+ CD38+ B cell %lymphocyte	rs75589249	14	43915569	T	C	0.0107	-0.5382	0.1197	3656	7.06708e-06	20.2106
IgD+ CD38+ B cell %lymphocyte	rs3811315	14	22499870	A	T	0.1157	0.1771	0.03756	3656	2.503e-06	22.2263
IgD+ CD38+ B cell %lymphocyte	rs2216762	16	84759446	C	T	0.8141	-0.1525	0.03097	3656	8.88403e-07	24.2403
IgD+ CD38+ B cell %lymphocyte	rs60521331	17	8639905	A	G	0.5022	0.1158	0.02425	3656	1.86299e-06	22.7968
IgD+ CD38+ B cell %lymphocyte	rs55708924	21	16767346	G	A	0.0185	-0.3886	0.0872	3656	8.58796e-06	19.8543
IgD+ CD38dim B cell %lymphocyte	rs143109147	1	40387371	C	T	0.0004	2.959	0.5843	3656	4.27701e-07	25.6389
IgD+ CD38dim B cell %lymphocyte	rs55877424	2	12243809	A	G	0.1607	0.1449	0.0327	3656	9.68902e-06	19.6301
IgD+ CD38dim B cell %lymphocyte	rs149290264	3	41659628	T	C	0.007	0.6348	0.1427	3656	8.93902e-06	19.7837
IgD+ CD38dim B cell %lymphocyte	rs182174914	3	80085882	A	T	0.0004	2.439	0.5502	3656	9.58893e-06	19.6455
IgD+ CD38dim B cell %lymphocyte	rs10933716	3	193840329	T	C	0.2486	-0.1262	0.02775	3656	5.61798e-06	20.6764
IgD+ CD38dim B cell %lymphocyte	rs28399382	3	115393238	T	C	0.1982	0.1411	0.0308	3656	4.74395e-06	20.9814
IgD+ CD38dim B cell %lymphocyte	rs28654727	4	61631854	A	C	0.2433	0.1272	0.02842	3656	7.89405e-06	20.0266
IgD+ CD38dim B cell %lymphocyte	rs6831487	4	170331972	G	T	0.4702	0.1165	0.02467	3656	2.42298e-06	22.2943
IgD+ CD38dim B cell %lymphocyte	rs75512885	5	158317602	A	T	0.0788	-0.2112	0.04633	3656	5.32304e-06	20.7752
IgD+ CD38dim B cell %lymphocyte	rs1510971	5	118216796	A	T	0.0826	-0.2012	0.04413	3656	5.292e-06	20.7811
IgD+ CD38dim B cell %lymphocyte	rs12516105	5	160198880	C	T	0.1737	0.1502	0.03243	3656	3.75301e-06	21.4451
IgD+ CD38dim B cell %lymphocyte	rs4361609	6	31240635	C	G	0.1131	-0.1912	0.04275	3656	7.92501e-06	19.9979
IgD+ CD38dim B cell %lymphocyte	rs9459562	6	166502048	C	G	0.4346	0.1106	0.0246	3656	7.11607e-06	20.2079
IgD+ CD38dim B cell %lymphocyte	rs34910780	7	77469688	T	A	0.048	-0.2544	0.05663	3656	7.26106e-06	20.1754
IgD+ CD38dim B cell %lymphocyte	rs62474511	7	123275484	T	A	0.0927	0.2018	0.04179	3656	1.417e-06	23.312
IgD+ CD38dim B cell %lymphocyte	rs4716961	7	155224134	C	T	0.0265	-0.3385	0.07465	3656	5.96898e-06	20.556
IgD+ CD38dim B cell %lymphocyte	rs7840067	8	130582787	C	T	0.1978	-0.1537	0.03026	3656	3.95704e-07	25.7924
IgD+ CD38dim B cell %lymphocyte	rs533239981	8	75515052	C	G	0.0387	0.3011	0.06365	3656	2.32199e-06	22.3721
IgD+ CD38dim B cell %lymphocyte	rs60953943	8	60077245	A	G	0.0204	-0.4228	0.08863	3656	1.91298e-06	22.7504
IgD+ CD38dim B cell %lymphocyte	rs76400856	10	56638876	C	A	0.0639	0.2233	0.0485	3656	4.30299e-06	21.1922
IgD+ CD38dim B cell %lymphocyte	rs74151247	10	97801073	A	C	0.0302	0.348	0.07127	3656	1.09199e-06	23.8356
IgD+ CD38dim B cell %lymphocyte	rs75319860	12	110312229	C	T	0.0249	0.3651	0.07896	3656	3.91201e-06	21.3742
IgD+ CD38dim B cell %lymphocyte	rs139695291	13	104519594	G	A	0.0011	1.581	0.3506	3656	6.69006e-06	20.3292
IgD+ CD38dim B cell %lymphocyte	rs75474045	13	72428296	A	G	0.0126	0.503	0.1077	3656	3.125e-06	21.8065
IgD+ CD38dim B cell %lymphocyte	rs12874404	13	108993494	G	A	0.3256	0.1366	0.02617	3656	1.89601e-07	27.238
IgD+ CD38dim B cell %lymphocyte	rs116844769	14	65713895	A	G	0.0662	-0.2347	0.04969	3656	2.40099e-06	22.3033
IgD+ CD38dim B cell %lymphocyte	rs16974449	16	84754964	A	C	0.4851	0.1233	0.02445	3656	4.77903e-07	25.4243
IgD+ CD38dim B cell %lymphocyte	rs60521331	17	8639905	A	G	0.5022	0.1214	0.02433	3656	6.26095e-07	24.8905
IgD+ CD38dim B cell %lymphocyte	rs11657531	17	2731370	T	C	0.4884	-0.1167	0.0237	3656	8.83894e-07	24.2396
IgD+ CD38dim B cell %lymphocyte	rs2291516	19	11508177	A	G	0.0793	0.1953	0.04406	3656	9.56996e-06	19.6425
IgD+ CD38dim B cell %lymphocyte	rs655580	19	53039110	A	G	0.4571	0.1258	0.02423	3656	2.18902e-07	26.9486
IgD+ CD38dim B cell %lymphocyte	rs6131010	20	44724305	G	A	0.6172	-0.1184	0.02588	3656	4.94698e-06	20.9245
IgD+ CD38dim B cell %lymphocyte	rs55708924	21	16767346	G	A	0.0185	-0.4222	0.08736	3656	1.39801e-06	23.3503
IgD+ CD38dim B cell %lymphocyte	rs143518319	21	36295623	A	C	0.015	-0.4492	0.09996	3656	7.21207e-06	20.1887
IgD+ CD38dim B cell %lymphocyte	rs142838362	21	47606966	T	C	0.0577	0.2463	0.05243	3656	2.72101e-06	22.0623
IgD+ CD38- B cell %lymphocyte	rs149701635	3	44741083	G	C	0.0263	-0.3548	0.07767	3656	5.08101e-06	20.8613
IgD+ CD38- B cell %lymphocyte	rs35088452	3	8847483	A	C	0.7471	-0.1352	0.02849	3656	2.15899e-06	22.5138
IgD+ CD38- B cell %lymphocyte	rs6895553	5	114821667	C	T	0.0946	-0.199	0.04272	3656	3.304e-06	21.6933
IgD+ CD38- B cell %lymphocyte	rs78009119	5	136421498	G	T	0.0137	-0.5085	0.1078	3656	2.49902e-06	22.2446
IgD+ CD38- B cell %lymphocyte	rs77055472	5	157655991	A	T	0.0495	-0.2682	0.05762	3656	3.36001e-06	21.6597
IgD+ CD38- B cell %lymphocyte	rs12197754	6	130521070	C	T	0.2014	-0.1427	0.03115	3656	4.74996e-06	20.9804
IgD+ CD38- B cell %lymphocyte	rs144625305	7	7871676	T	C	0.0086	0.6141	0.1364	3656	6.89795e-06	20.2643
IgD+ CD38- B cell %lymphocyte	rs12763172	10	85447519	C	T	0.7213	0.1272	0.02784	3656	5.05196e-06	20.8697
IgD+ CD38- B cell %lymphocyte	rs12146653	11	21411891	C	T	0.0964	0.1892	0.04126	3656	4.66305e-06	21.0216
IgD+ CD38- B cell %lymphocyte	rs12829274	12	129349167	G	A	0.0618	-0.2515	0.05194	3656	1.33999e-06	23.4398
IgD+ CD38- B cell %lymphocyte	rs3730631	12	69228178	C	T	0.1288	-0.1789	0.03729	3656	1.66399e-06	23.01
IgD+ CD38- B cell %lymphocyte	rs12874404	13	108993494	G	A	0.3256	0.1714	0.02663	3656	1.385e-10	41.4153
IgD+ CD38- B cell %lymphocyte	rs112782756	13	34506073	G	A	0.0003	3.09	0.683	3656	6.25101e-06	20.4624
IgD+ CD38- B cell %lymphocyte	rs2003291	13	21566923	T	C	0.1413	-0.1589	0.0357	3656	8.76597e-06	19.8058
IgD+ CD38- B cell %lymphocyte	rs77762131	14	96205838	C	G	0.045	0.3532	0.058	3656	1.24701e-09	37.0738
IgD+ CD38- B cell %lymphocyte	rs72706301	14	94852219	A	G	0.0179	0.448	0.09406	3656	1.98299e-06	22.6792
IgD+ CD38- B cell %lymphocyte	rs149731447	14	52536948	T	C	0.0036	-0.9621	0.2156	3656	8.35699e-06	19.9078
IgD+ CD38- B cell %lymphocyte	rs10444793	15	44517689	A	G	0.0181	-0.4323	0.09225	3656	2.88602e-06	21.9543
IgD+ CD38- B cell %lymphocyte	rs28594458	17	2728777	G	C	0.4918	-0.1135	0.02418	3656	2.76599e-06	22.0273
IgD+ CD38- B cell %lymphocyte	rs62235484	21	41083050	A	G	0.0175	0.4662	0.09386	3656	7.13608e-07	24.6641
IgD+ CD38- B cell %lymphocyte	rs78007261	22	45666517	T	C	0.0379	-0.3003	0.06556	3656	4.80895e-06	20.9756
Unswitched memory B cell %lymphocyte	rs75766272	1	8009985	T	C	0.0201	-0.3961	0.08527	3656	3.51901e-06	21.5724
Unswitched memory B cell %lymphocyte	rs56326639	3	32512523	G	A	0.1761	0.1461	0.0323	3656	6.29999e-06	20.4539
Unswitched memory B cell %lymphocyte	rs6557137	6	150197022	T	C	0.1838	-0.1494	0.03221	3656	3.62001e-06	21.508
Unswitched memory B cell %lymphocyte	rs144625305	7	7871676	T	C	0.0086	0.5993	0.1343	3656	8.30004e-06	19.9075
Unswitched memory B cell %lymphocyte	rs2956955	8	1552537	C	T	0.9661	-0.3254	0.06746	3656	1.47099e-06	23.2607
Unswitched memory B cell %lymphocyte	rs141247883	8	144986071	G	A	0.0319	-0.3185	0.06842	3656	3.34503e-06	21.6638
Unswitched memory B cell %lymphocyte	rs57757402	9	37390411	G	A	0.1435	-0.1601	0.03523	3656	5.67806e-06	20.6461
Unswitched memory B cell %lymphocyte	rs11794578	9	808529	G	T	0.4521	0.1189	0.02437	3656	1.12101e-06	23.7976
Unswitched memory B cell %lymphocyte	rs10119513	9	16899526	A	G	0.9784	0.3622	0.08185	3656	9.91197e-06	19.5768
Unswitched memory B cell %lymphocyte	rs10840410	11	10437096	C	T	0.3087	-0.1182	0.02642	3656	7.88206e-06	20.0102
Unswitched memory B cell %lymphocyte	rs10894530	11	132159459	A	C	0.1296	-0.1638	0.03684	3656	9.00409e-06	19.7638
Unswitched memory B cell %lymphocyte	rs143553941	12	109368119	C	G	0.013	0.501	0.107	3656	2.95801e-06	21.9174
Unswitched memory B cell %lymphocyte	rs12829274	12	129349167	G	A	0.0618	-0.2536	0.0511	3656	7.30601e-07	24.6228
Unswitched memory B cell %lymphocyte	rs73192651	13	50212885	T	C	0.02	0.5455	0.08807	3656	6.53597e-10	38.3544
Unswitched memory B cell %lymphocyte	rs12874404	13	108993494	G	A	0.3256	0.1827	0.02625	3656	4.02346e-12	48.4283
Unswitched memory B cell %lymphocyte	rs557577736	13	46224092	G	A	0.001	1.799	0.3838	3656	2.857e-06	21.9651
Unswitched memory B cell %lymphocyte	rs77762131	14	96205838	C	G	0.045	0.3287	0.05701	3656	8.74903e-09	33.2337
Unswitched memory B cell %lymphocyte	rs8014978	14	94936964	C	T	0.5737	-0.1203	0.02463	3656	1.08201e-06	23.8497
Unswitched memory B cell %lymphocyte	rs112135308	16	86794463	G	C	0.0174	0.416	0.08833	3656	2.57099e-06	22.1744
Unswitched memory B cell %lymphocyte	rs11657759	17	2715961	C	A	0.4903	-0.1271	0.02394	3656	1.16099e-07	28.1789
Unswitched memory B cell %lymphocyte	rs7254039	19	14993354	A	G	0.0435	-0.2695	0.05778	3656	3.20797e-06	21.7492
Unswitched memory B cell %lymphocyte	rs6032660	20	44730245	A	G	0.6359	-0.1525	0.02629	3656	7.19797e-09	33.6387
Unswitched memory B cell %lymphocyte	rs76762356	20	10454080	G	A	0.0228	-0.3702	0.08274	3656	7.91699e-06	20.0135
Unswitched memory B cell %lymphocyte	rs55712190	22	22613458	T	C	0.074	0.2264	0.04694	3656	1.467e-06	23.2567
IgD- CD27- B cell %lymphocyte	rs2789568	1	217179038	C	T	0.0706	-0.2462	0.04816	3656	3.32897e-07	26.1267
IgD- CD27- B cell %lymphocyte	rs113442137	1	160254955	A	G	0.0472	-0.2734	0.0574	3656	1.97301e-06	22.6806
IgD- CD27- B cell %lymphocyte	rs185621536	1	113524501	T	C	0.0312	-0.3248	0.07016	3656	3.79997e-06	21.4257
IgD- CD27- B cell %lymphocyte	rs7606024	2	56616595	A	T	0.7882	-0.1469	0.03041	3656	1.42498e-06	23.3288
IgD- CD27- B cell %lymphocyte	rs35574803	3	32533246	C	T	0.0562	-0.3044	0.05397	3656	1.83101e-08	31.8028
IgD- CD27- B cell %lymphocyte	rs78756830	4	99437210	C	T	0.0194	0.4221	0.08746	3656	1.45301e-06	23.2859
IgD- CD27- B cell %lymphocyte	rs12654363	5	84064142	T	C	0.9301	-0.2241	0.04812	3656	3.31398e-06	21.6827
IgD- CD27- B cell %lymphocyte	rs191610741	6	4201348	T	C	0.0257	-0.3731	0.08152	3656	4.87304e-06	20.9413
IgD- CD27- B cell %lymphocyte	rs807894	6	164610887	G	T	0.5868	0.114	0.02536	3656	7.13198e-06	20.2019
IgD- CD27- B cell %lymphocyte	rs1978170	7	38757409	G	A	0.6033	-0.113	0.02548	3656	9.38793e-06	19.6625
IgD- CD27- B cell %lymphocyte	rs78763642	9	25294308	A	G	0.0279	-0.3442	0.07449	3656	3.96798e-06	21.3455
IgD- CD27- B cell %lymphocyte	rs2250246	12	6553016	G	A	0.5341	0.1325	0.02454	3656	7.13296e-08	29.145
IgD- CD27- B cell %lymphocyte	rs77114347	16	7452768	T	A	0.0543	-0.239	0.05358	3656	8.41608e-06	19.8917
IgD- CD27- B cell %lymphocyte	rs4941188	18	60857029	A	G	0.6726	-0.1285	0.02642	3656	1.20401e-06	23.6495
IgD- CD27- B cell %lymphocyte	rs111407982	19	8814367	T	C	0.1551	-0.1612	0.03377	3656	1.87499e-06	22.7798
IgD- CD27- B cell %lymphocyte	rs7260348	19	15011442	C	T	0.0722	-0.2227	0.04722	3656	2.49799e-06	22.2367
IgD- CD27- B cell %lymphocyte	rs77126700	20	47313887	C	T	0.0239	0.3695	0.08021	3656	4.22698e-06	21.2155
IgD- CD27- B cell %lymphocyte	rs4810485	20	44747947	G	T	0.6313	0.317	0.02622	3656	4.97966e-33	146.128
Switched memory B cell %lymphocyte	rs7595246	2	238554657	C	T	0.1893	0.1684	0.03143	3656	8.91908e-08	28.6996
Switched memory B cell %lymphocyte	rs1519526	2	136967396	C	T	0.1957	0.1674	0.03168	3656	1.341e-07	27.914
Switched memory B cell %lymphocyte	rs7640978	3	32533010	T	C	0.1493	0.1649	0.0355	3656	3.535e-06	21.5708
Switched memory B cell %lymphocyte	rs17029267	4	100572746	T	C	0.03	0.3178	0.07088	3656	7.56397e-06	20.0975
Switched memory B cell %lymphocyte	rs62382785	5	165581566	A	G	0.2492	0.1313	0.02902	3656	6.22702e-06	20.4652
Switched memory B cell %lymphocyte	rs17405603	5	144608340	T	A	0.2842	-0.1343	0.02781	3656	1.44202e-06	23.3148
Switched memory B cell %lymphocyte	rs190799514	8	55620993	C	T	0.0272	0.3656	0.07711	3656	2.20298e-06	22.4736
Switched memory B cell %lymphocyte	rs7840395	8	144984956	G	A	0.5715	-0.1437	0.02516	3656	1.21099e-08	32.6117
Switched memory B cell %lymphocyte	rs814418	8	9936753	T	C	0.0907	0.199	0.04491	3656	9.6801e-06	19.6291
Switched memory B cell %lymphocyte	rs118076634	11	94589940	T	C	0.0025	1.115	0.2283	3656	1.083e-06	23.8462
Switched memory B cell %lymphocyte	rs12426629	12	54797571	G	C	0.0989	-0.2182	0.04316	3656	4.52397e-07	25.5522
Switched memory B cell %lymphocyte	rs726449	13	109151489	T	C	0.4387	0.1133	0.02505	3656	6.35902e-06	20.4515
Switched memory B cell %lymphocyte	rs9520836	13	108957063	G	A	0.5044	0.1567	0.02479	3656	2.91199e-10	39.9453
Switched memory B cell %lymphocyte	rs11653761	17	2716535	T	G	0.592	-0.1491	0.02489	3656	2.298e-09	35.8746
Switched memory B cell %lymphocyte	rs145744014	18	61418402	T	C	0.0116	0.5148	0.1143	3656	6.92293e-06	20.2799
Switched memory B cell %lymphocyte	rs138728953	19	14698416	A	C	0.0319	0.311	0.06986	3656	8.77708e-06	19.8128
Switched memory B cell %lymphocyte	rs117231919	19	652628	T	C	0.1219	0.17	0.03776	3656	6.95296e-06	20.2635
Switched memory B cell %lymphocyte	rs377621503	19	645485	T	C	0.0049	-0.7635	0.1715	3656	8.80299e-06	19.8139
Plasma Blast-Plasma Cell %lymphocyte	rs141365416	1	102236814	T	C	0.0005	2.328	0.4961	3657	2.79402e-06	22.0145
Plasma Blast-Plasma Cell %lymphocyte	rs148362575	2	187165335	T	A	0.0008	2.608	0.5526	3657	2.46598e-06	22.2677
Plasma Blast-Plasma Cell %lymphocyte	rs116540222	3	117331256	T	C	0.0011	1.756	0.3749	3657	2.922e-06	21.9331
Plasma Blast-Plasma Cell %lymphocyte	rs7449190	5	1297918	C	T	0.7401	0.1298	0.028	3657	3.66902e-06	21.484
Plasma Blast-Plasma Cell %lymphocyte	rs61294310	6	5266557	G	A	0.0124	0.5223	0.1088	3657	1.65299e-06	23.039
Plasma Blast-Plasma Cell %lymphocyte	rs13244540	7	151002534	T	G	0.0447	0.2681	0.05848	3657	4.69505e-06	21.0116
Plasma Blast-Plasma Cell %lymphocyte	rs62519719	8	118376967	A	G	0.2815	-0.1218	0.02685	3657	5.97998e-06	20.5725
Plasma Blast-Plasma Cell %lymphocyte	rs74326785	8	24549984	C	T	0.0279	0.351	0.07464	3657	2.65497e-06	22.1081
Plasma Blast-Plasma Cell %lymphocyte	rs3138500	9	92219945	T	C	0.0678	-0.2314	0.04918	3657	2.62398e-06	22.1325
Plasma Blast-Plasma Cell %lymphocyte	rs12412378	10	130483163	A	C	0.1608	-0.1755	0.03276	3657	9.03795e-08	28.6911
Plasma Blast-Plasma Cell %lymphocyte	rs1938685	11	69277078	A	G	0.1359	-0.158	0.03558	3657	9.27492e-06	19.7144
Plasma Blast-Plasma Cell %lymphocyte	rs897989	11	91973528	G	T	0.3001	-0.1183	0.02654	3657	8.57196e-06	19.8632
Plasma Blast-Plasma Cell %lymphocyte	rs55728331	11	117526440	A	G	0.0015	1.624	0.3466	3657	2.90603e-06	21.9481
Plasma Blast-Plasma Cell %lymphocyte	rs10849436	12	6409619	A	G	0.1596	0.1516	0.03371	3657	7.12197e-06	20.2191
Plasma Blast-Plasma Cell %lymphocyte	rs1838357	13	93740906	A	G	0.3142	0.1167	0.02638	3657	9.94489e-06	19.5647
Plasma Blast-Plasma Cell %lymphocyte	rs4785074	16	59885737	T	C	0.6349	-0.1403	0.02562	3657	4.61998e-08	29.9805
Plasma Blast-Plasma Cell %lymphocyte	rs7255292	19	49529379	C	T	0.853	-0.1601	0.035	3657	4.94903e-06	20.9184
Plasma Blast-Plasma Cell %lymphocyte	rs8132059	21	16916284	T	C	0.2244	-0.1294	0.02876	3657	7.04304e-06	20.2382
Plasma Blast-Plasma Cell %lymphocyte	rs11089305	22	19729361	G	A	0.2882	0.1295	0.02684	3657	1.45301e-06	23.2732
Memory B cell %lymphocyte	rs75414548	1	39385714	A	G	0.0354	0.2864	0.06412	3656	8.202e-06	19.9453
Memory B cell %lymphocyte	rs75766272	1	8009985	T	C	0.0201	-0.3971	0.08543	3656	3.46003e-06	21.6003
Memory B cell %lymphocyte	rs878471	1	150547747	A	G	0.5429	-0.1135	0.02517	3656	6.73907e-06	20.3286
Memory B cell %lymphocyte	rs12636848	3	147613080	G	T	0.3031	0.1242	0.02655	3656	2.98401e-06	21.8774
Memory B cell %lymphocyte	rs143003356	4	142016471	A	G	0.0115	-0.5299	0.1157	3656	4.78597e-06	20.9702
Memory B cell %lymphocyte	rs17708396	5	148410250	A	C	0.0005	2.518	0.5212	3656	1.41198e-06	23.3337
Memory B cell %lymphocyte	rs6895553	5	114821667	C	T	0.0946	-0.1889	0.04221	3656	7.88297e-06	20.0223
Memory B cell %lymphocyte	rs1770731	6	107001456	T	A	0.8254	-0.1473	0.0326	3656	6.38705e-06	20.4104
Memory B cell %lymphocyte	rs74505387	6	101891742	C	T	0.1057	-0.2033	0.03964	3656	3.08496e-07	26.2959
Memory B cell %lymphocyte	rs410173	6	1163541	G	A	0.8222	-0.144	0.03208	3656	7.39299e-06	20.1436
Memory B cell %lymphocyte	rs144625305	7	7871676	T	C	0.0086	0.6141	0.1347	3656	5.31202e-06	20.779
Memory B cell %lymphocyte	rs6558507	8	1626220	T	C	0.9547	-0.2635	0.05776	3656	5.25001e-06	20.806
Memory B cell %lymphocyte	rs34173062	8	145158607	A	G	0.2153	0.1453	0.02991	3656	1.242e-06	23.5928
Memory B cell %lymphocyte	rs12763172	10	85447519	C	T	0.7213	0.132	0.02749	3656	1.637e-06	23.0505
Memory B cell %lymphocyte	rs10791220	11	132145598	G	A	0.1134	-0.1793	0.03894	3656	4.27602e-06	21.1958
Memory B cell %lymphocyte	rs11225155	11	102043400	A	G	0.5364	0.1112	0.0245	3656	5.85706e-06	20.5948
Memory B cell %lymphocyte	rs74839056	13	107914821	T	C	0.0015	1.357	0.3052	3656	8.92093e-06	19.7639
Memory B cell %lymphocyte	rs557577736	13	46224092	G	A	0.001	1.799	0.3851	3656	3.10699e-06	21.8171
Memory B cell %lymphocyte	rs12874404	13	108993494	G	A	0.3256	0.2221	0.0262	3656	3.31284e-17	71.8416
Memory B cell %lymphocyte	rs9514859	13	109144845	C	G	0.4402	0.112	0.02469	3656	5.93403e-06	20.5719
Memory B cell %lymphocyte	rs73192651	13	50212885	T	C	0.02	0.442	0.08807	3656	5.43801e-07	25.1808
Memory B cell %lymphocyte	rs77762131	14	96205838	C	G	0.045	0.3049	0.05737	3656	1.13201e-07	28.2375
Memory B cell %lymphocyte	rs974368	14	63009549	A	G	0.5141	0.1136	0.02464	3656	4.17004e-06	21.2499
Memory B cell %lymphocyte	rs139196765	15	24733764	G	A	0.0025	1.237	0.2495	3656	7.49307e-07	24.5742
Memory B cell %lymphocyte	rs11653761	17	2716535	T	G	0.592	-0.1359	0.02451	3656	3.17497e-08	30.735
Memory B cell %lymphocyte	rs7254039	19	14993354	A	G	0.0435	-0.2668	0.05819	3656	4.68004e-06	21.0163
Memory B cell %lymphocyte	rs551529415	19	1157330	T	C	0.01	-0.5751	0.124	3656	3.62001e-06	21.5043
Memory B cell %lymphocyte	rs3810559	20	3207749	G	T	0.5444	-0.1132	0.02457	3656	4.24004e-06	21.2209
Memory B cell %lymphocyte	rs4640493	22	45387786	T	A	0.83	0.1493	0.03234	3656	4.01301e-06	21.3069
Memory B cell %lymphocyte	rs9614226	22	44688150	G	T	0.9792	-0.3841	0.08631	3656	8.80603e-06	19.7992
Naive-mature B cell %lymphocyte	rs11937214	4	162634026	G	A	0.0465	0.271	0.06102	3656	9.17698e-06	19.7186
Naive-mature B cell %lymphocyte	rs76845048	5	115785493	C	A	0.0357	-0.3046	0.06737	3656	6.33695e-06	20.4366
Naive-mature B cell %lymphocyte	rs115204570	5	135756457	T	G	0.0161	-0.479	0.1028	3656	3.26701e-06	21.7053
Naive-mature B cell %lymphocyte	rs17056318	5	158285953	C	T	0.081	-0.2266	0.04592	3656	8.38591e-07	24.3443
Naive-mature B cell %lymphocyte	rs4361609	6	31240635	C	G	0.1131	-0.1954	0.04397	3656	9.11801e-06	19.7432
Naive-mature B cell %lymphocyte	rs35607968	7	67653879	T	C	0.1536	0.1611	0.03434	3656	2.82703e-06	22.0025
Naive-mature B cell %lymphocyte	rs111830700	7	121332400	A	G	0.0377	0.2916	0.06457	3656	6.51493e-06	20.3889
Naive-mature B cell %lymphocyte	rs140197720	7	108191234	T	C	0.0153	0.4648	0.1016	3656	4.93799e-06	20.9231
Naive-mature B cell %lymphocyte	rs2395904	8	130617819	G	T	0.2657	-0.1504	0.02772	3656	6.15106e-08	29.43
Naive-mature B cell %lymphocyte	rs4361743	8	132657435	C	T	0.9725	0.3335	0.07409	3656	6.96707e-06	20.256
Naive-mature B cell %lymphocyte	rs533239981	8	75515052	C	G	0.0387	0.3348	0.06479	3656	2.50098e-07	26.6954
Naive-mature B cell %lymphocyte	rs2978582	8	35485504	C	T	0.1969	0.1509	0.0316	3656	1.84599e-06	22.7974
Naive-mature B cell %lymphocyte	rs74151247	10	97801073	A	C	0.0302	0.3341	0.07265	3656	4.39097e-06	21.1428
Naive-mature B cell %lymphocyte	rs56097028	11	43575416	C	G	0.3832	0.1156	0.02559	3656	6.47903e-06	20.4012
Naive-mature B cell %lymphocyte	rs74397782	12	25018659	A	G	0.0343	-0.3176	0.06621	3656	1.679e-06	23.0036
Naive-mature B cell %lymphocyte	rs78433555	12	107821321	A	C	0.0501	0.2756	0.05706	3656	1.42498e-06	23.3226
Naive-mature B cell %lymphocyte	rs116844769	14	65713895	A	G	0.0662	-0.2342	0.05066	3656	3.92202e-06	21.3661
Naive-mature B cell %lymphocyte	rs112850074	14	103229069	G	A	0.031	0.3445	0.07141	3656	1.46299e-06	23.2671
Naive-mature B cell %lymphocyte	rs12939565	17	38038389	T	A	0.4267	-0.1308	0.02872	3656	5.41901e-06	20.7361
Naive-mature B cell %lymphocyte	rs11653761	17	2716535	T	G	0.592	-0.1122	0.02478	3656	6.17206e-06	20.4958
Naive-mature B cell %lymphocyte	rs4805840	19	33468482	G	A	0.823	-0.1599	0.03309	3656	1.41501e-06	23.3445
Naive-mature B cell %lymphocyte	rs55658072	19	14873284	G	A	0.6219	0.1132	0.02554	3656	9.63407e-06	19.6396
Naive-mature B cell %lymphocyte	rs7270264	20	42078615	C	T	0.4132	-0.1135	0.02501	3656	5.87706e-06	20.5895
Naive-mature B cell %lymphocyte	rs55708924	21	16767346	G	A	0.0185	-0.3974	0.08899	3656	8.23797e-06	19.9368
IgD- CD38dim B cell Absolute Count	rs77848220	1	61251434	T	C	0.0219	0.405	0.08232	3656	9.04191e-07	24.1981
IgD- CD38dim B cell Absolute Count	rs7595246	2	238554657	C	T	0.1893	0.14	0.03035	3656	4.08602e-06	21.2726
IgD- CD38dim B cell Absolute Count	rs115414430	2	36720835	G	C	0.0286	0.3388	0.07271	3656	3.29102e-06	21.706
IgD- CD38dim B cell Absolute Count	rs1519524	2	136934125	A	T	0.2246	0.141	0.02892	3656	1.12499e-06	23.7642
IgD- CD38dim B cell Absolute Count	rs141352577	3	8492010	T	C	0.0235	0.3656	0.07671	3656	1.95501e-06	22.7086
IgD- CD38dim B cell Absolute Count	rs73185679	3	186485863	C	T	0.1041	0.1715	0.0387	3656	9.56093e-06	19.633
IgD- CD38dim B cell Absolute Count	rs7840395	8	144984956	G	A	0.5715	-0.1267	0.02425	3656	1.85498e-07	27.2905
IgD- CD38dim B cell Absolute Count	rs16925715	10	53772842	C	T	0.2824	-0.1298	0.02698	3656	1.556e-06	23.1391
IgD- CD38dim B cell Absolute Count	rs149006488	11	67523715	G	C	0.1496	-0.1579	0.03413	3656	3.83804e-06	21.398
IgD- CD38dim B cell Absolute Count	rs61910510	11	130557122	T	C	0.0295	0.3355	0.07014	3656	1.79498e-06	22.8736
IgD- CD38dim B cell Absolute Count	rs4936106	11	130360402	G	C	0.0289	0.3309	0.07134	3656	3.62602e-06	21.5084
IgD- CD38dim B cell Absolute Count	rs79407211	13	109119262	T	C	0.0886	-0.1927	0.04286	3656	7.15303e-06	20.2088
IgD- CD38dim B cell Absolute Count	rs73178168	13	47809629	T	C	0.1703	0.1583	0.03258	3656	1.23501e-06	23.6016
IgD- CD38dim B cell Absolute Count	rs192544457	13	42337460	A	G	0.006	0.8492	0.1563	3656	5.91698e-08	29.5109
IgD- CD38dim B cell Absolute Count	rs9520836	13	108957063	G	A	0.5044	0.1117	0.02394	3656	3.14398e-06	21.764
IgD- CD38dim B cell Absolute Count	rs60035843	15	69123222	G	A	0.2382	0.1277	0.02849	3656	7.63801e-06	20.0853
IgD- CD38dim B cell Absolute Count	rs11653761	17	2716535	T	G	0.592	-0.1121	0.02405	3656	3.28897e-06	21.7201
IgD- CD38dim B cell Absolute Count	rs117605782	18	46442174	A	G	0.0034	0.8913	0.1987	3656	7.486e-06	20.1156
IgD- CD38dim B cell Absolute Count	rs533086	19	16411841	G	A	0.7021	-0.119	0.02614	3656	5.45306e-06	20.7188
IgD- CD38dim B cell Absolute Count	rs78893742	20	36100011	A	G	0.0081	0.6139	0.1321	3656	3.47696e-06	21.5909
IgD+ CD24+ B cell %lymphocyte	rs61788860	1	60020239	A	G	0.0475	-0.2606	0.05786	3656	6.85993e-06	20.2802
IgD+ CD24+ B cell %lymphocyte	rs75766272	1	8009985	T	C	0.0201	-0.4103	0.08583	3656	1.81899e-06	22.8458
IgD+ CD24+ B cell %lymphocyte	rs2015983	2	237150166	C	A	0.8771	-0.1746	0.03658	3656	1.874e-06	22.7763
IgD+ CD24+ B cell %lymphocyte	rs6781675	3	4408435	C	G	0.0235	0.3639	0.08068	3656	6.68405e-06	20.3382
IgD+ CD24+ B cell %lymphocyte	rs1382818	6	153645785	A	G	0.3734	0.1127	0.02506	3656	7.13707e-06	20.2193
IgD+ CD24+ B cell %lymphocyte	rs4937689	11	132141201	G	A	0.1134	-0.1736	0.03911	3656	9.35793e-06	19.6972
IgD+ CD24+ B cell %lymphocyte	rs183466766	13	108710731	A	G	0.0402	0.2998	0.06089	3656	8.89693e-07	24.2355
IgD+ CD24+ B cell %lymphocyte	rs12874404	13	108993494	G	A	0.3256	0.2335	0.02632	3656	1.09295e-18	78.6834
IgD+ CD24+ B cell %lymphocyte	rs141107540	13	109038407	T	C	0.0777	0.2109	0.04678	3656	6.71305e-06	20.3195
IgD+ CD24+ B cell %lymphocyte	rs73192651	13	50212885	T	C	0.02	0.4819	0.08877	3656	6.07393e-08	29.462
IgD+ CD24+ B cell %lymphocyte	rs77762131	14	96205838	C	G	0.045	0.3082	0.05742	3656	8.52491e-08	28.8018
IgD+ CD24+ B cell %lymphocyte	rs8014978	14	94936964	C	T	0.5737	-0.11	0.02481	3656	9.59997e-06	19.6523
IgD+ CD24+ B cell %lymphocyte	rs11657118	17	2714118	C	T	0.475	-0.1428	0.02416	3656	3.70101e-09	34.9256
IgD+ CD24+ B cell %lymphocyte	rs7254039	19	14993354	A	G	0.0435	-0.263	0.05818	3656	6.39794e-06	20.4289
IgD+ CD24+ B cell %lymphocyte	rs3810559	20	3207749	G	T	0.5444	-0.1107	0.02469	3656	7.52004e-06	20.0971
IgD- CD24- B cell %lymphocyte	rs6687573	1	35281308	A	C	0.2311	0.1339	0.02945	3656	5.57301e-06	20.6667
IgD- CD24- B cell %lymphocyte	rs55756125	1	59740965	C	T	0.2289	0.1417	0.0299	3656	2.21702e-06	22.4532
IgD- CD24- B cell %lymphocyte	rs111237501	1	163272701	C	T	0.003	1.002	0.226	3656	9.47109e-06	19.6517
IgD- CD24- B cell %lymphocyte	rs11674994	2	60125363	C	T	0.0553	0.2499	0.05599	3656	8.30309e-06	19.9156
IgD- CD24- B cell %lymphocyte	rs72990172	2	238526279	A	G	0.1711	0.1576	0.03306	3656	1.92699e-06	22.7189
IgD- CD24- B cell %lymphocyte	rs76225955	4	31594004	C	T	0.0909	-0.1917	0.04317	3656	9.29994e-06	19.7134
IgD- CD24- B cell %lymphocyte	rs17044633	4	113331648	G	A	0.0286	0.3433	0.076	3656	6.45194e-06	20.3987
IgD- CD24- B cell %lymphocyte	rs183821560	5	62072324	A	G	0.0016	-1.768	0.393	3656	7.04807e-06	20.233
IgD- CD24- B cell %lymphocyte	rs807894	6	164610887	G	T	0.5868	0.1202	0.02568	3656	2.99799e-06	21.9028
IgD- CD24- B cell %lymphocyte	rs9398107	6	107155687	G	A	0.0555	0.2699	0.05578	3656	1.36301e-06	23.4061
IgD- CD24- B cell %lymphocyte	rs75464772	6	19788226	T	C	0.0325	-0.328	0.07098	3656	3.94003e-06	21.348
IgD- CD24- B cell %lymphocyte	rs6991364	8	145050345	A	G	0.5149	-0.1156	0.02534	3656	5.19505e-06	20.8058
IgD- CD24- B cell %lymphocyte	rs146221269	11	94920856	C	T	0.0029	-1.07	0.2371	3656	6.59903e-06	20.3604
IgD- CD24- B cell %lymphocyte	rs73277142	12	11974332	T	C	0.0555	0.2673	0.05558	3656	1.58099e-06	23.1229
IgD- CD24- B cell %lymphocyte	rs11066272	12	112802224	T	A	0.557	-0.1184	0.02664	3656	9.09306e-06	19.7477
IgD- CD24- B cell %lymphocyte	rs139509958	12	54727027	A	G	0.0788	-0.2174	0.0478	3656	5.57995e-06	20.6797
IgD- CD24- B cell %lymphocyte	rs191543445	14	31505138	G	A	0.031	0.3254	0.07232	3656	7.01504e-06	20.2395
IgD- CD24- B cell %lymphocyte	rs17102161	14	65283958	A	G	0.0506	0.2573	0.05689	3656	6.28102e-06	20.4498
IgD- CD24- B cell %lymphocyte	rs496760	15	54695686	A	G	0.6422	0.1187	0.02657	3656	8.15305e-06	19.9526
IgD- CD24- B cell %lymphocyte	rs75150138	16	49238584	A	T	0.0517	-0.2581	0.05593	3656	4.05303e-06	21.2896
IgD- CD24- B cell %lymphocyte	rs11862268	16	81239867	A	G	0.0187	0.4267	0.09042	3656	2.464e-06	22.2637
IgD- CD24- B cell %lymphocyte	rs58904842	16	3463156	A	C	0.4768	-0.1174	0.02499	3656	2.72101e-06	22.064
IgD- CD24- B cell %lymphocyte	rs30146	16	14342183	C	T	0.0198	-0.4244	0.09112	3656	3.30697e-06	21.6873
IgD- CD24- B cell %lymphocyte	rs8098848	18	60857793	T	C	0.6704	-0.1264	0.02668	3656	2.243e-06	22.439
IgD- CD24- B cell %lymphocyte	rs451367	19	16412842	C	T	0.7674	-0.1313	0.0296	3656	9.51305e-06	19.671
IgD+ CD24- B cell %lymphocyte	rs16837671	2	206655953	G	T	0.0494	-0.2649	0.05732	3656	3.95103e-06	21.3517
IgD+ CD24- B cell %lymphocyte	rs520786	3	187559064	A	T	0.3489	-0.1136	0.02562	3656	9.48506e-06	19.6553
IgD+ CD24- B cell %lymphocyte	rs34712193	3	1814140	T	A	0.1644	0.1567	0.03246	3656	1.44501e-06	23.2982
IgD+ CD24- B cell %lymphocyte	rs17056318	5	158285953	C	T	0.081	-0.2015	0.04509	3656	8.14292e-06	19.9651
IgD+ CD24- B cell %lymphocyte	rs76845048	5	115785493	C	A	0.0357	-0.2982	0.06626	3656	6.99198e-06	20.2485
IgD+ CD24- B cell %lymphocyte	rs115204570	5	135756457	T	G	0.0161	-0.4604	0.1008	3656	5.08698e-06	20.856
IgD+ CD24- B cell %lymphocyte	rs140523784	6	16887609	T	C	0.1864	0.1447	0.03153	3656	4.58205e-06	21.0557
IgD+ CD24- B cell %lymphocyte	rs9354413	6	67039330	C	T	0.2964	0.1258	0.02705	3656	3.44096e-06	21.6226
IgD+ CD24- B cell %lymphocyte	rs4361609	6	31240635	C	G	0.1131	-0.2163	0.04242	3656	3.57298e-07	25.9928
IgD+ CD24- B cell %lymphocyte	rs111830700	7	121332400	A	G	0.0377	0.2933	0.0634	3656	3.85896e-06	21.3957
IgD+ CD24- B cell %lymphocyte	rs34910780	7	77469688	T	A	0.048	-0.282	0.05676	3656	7.03105e-07	24.6771
IgD+ CD24- B cell %lymphocyte	rs12542190	8	130594761	C	A	0.1943	-0.1572	0.03051	3656	2.72402e-07	26.5401
IgD+ CD24- B cell %lymphocyte	rs2978582	8	35485504	C	T	0.1969	0.1404	0.03106	3656	6.34498e-06	20.4274
IgD+ CD24- B cell %lymphocyte	rs533239981	8	75515052	C	G	0.0387	0.3428	0.06378	3656	8.19502e-08	28.8798
IgD+ CD24- B cell %lymphocyte	rs71483382	10	83763586	A	G	0.0078	0.6298	0.1399	3656	6.90399e-06	20.2605
IgD+ CD24- B cell %lymphocyte	rs75319860	12	110312229	C	T	0.0249	0.3524	0.07909	3656	8.61509e-06	19.8477
IgD+ CD24- B cell %lymphocyte	rs76578043	13	105214810	A	G	0.0298	0.3251	0.06938	3656	2.89601e-06	21.9506
IgD+ CD24- B cell %lymphocyte	rs2994690	14	95363646	C	G	0.2462	0.1312	0.02819	3656	3.38197e-06	21.655
IgD+ CD24- B cell %lymphocyte	rs116844769	14	65713895	A	G	0.0662	-0.232	0.04979	3656	3.28103e-06	21.7057
IgD+ CD24- B cell %lymphocyte	rs9900847	17	2717218	C	T	0.6041	-0.1133	0.02454	3656	4.05602e-06	21.3104
IgD+ CD24- B cell %lymphocyte	rs12939565	17	38038389	T	A	0.4267	-0.1318	0.02761	3656	1.87098e-06	22.7813
IgD+ CD24- B cell %lymphocyte	rs73426855	17	77637123	C	T	0.1469	-0.1549	0.03435	3656	6.67806e-06	20.3297
IgD+ CD24- B cell %lymphocyte	rs4805840	19	33468482	G	A	0.823	-0.152	0.03242	3656	2.85503e-06	21.9757
IgD+ CD24- B cell %lymphocyte	rs6131010	20	44724305	G	A	0.6172	-0.1285	0.0258	3656	6.64003e-07	24.7998
CD24+ CD27+ B cell %lymphocyte	rs75766272	1	8009985	T	C	0.0201	-0.4263	0.08511	3656	5.73099e-07	25.0813
CD24+ CD27+ B cell %lymphocyte	rs76720471	2	222274805	T	C	0.0011	1.557	0.3419	3656	5.46399e-06	20.7329
CD24+ CD27+ B cell %lymphocyte	rs1519524	2	136934125	A	T	0.2246	0.1322	0.02942	3656	7.22504e-06	20.1864
CD24+ CD27+ B cell %lymphocyte	rs112542522	2	4031340	A	G	0.0082	0.6143	0.1326	3656	3.72804e-06	21.4563
CD24+ CD27+ B cell %lymphocyte	rs12636848	3	147613080	G	T	0.3031	0.1237	0.02646	3656	3.02601e-06	21.8495
CD24+ CD27+ B cell %lymphocyte	rs4689417	4	4392393	A	C	0.2961	-0.1241	0.02671	3656	3.50598e-06	21.5813
CD24+ CD27+ B cell %lymphocyte	rs17708396	5	148410250	A	C	0.0005	2.517	0.5195	3656	1.31899e-06	23.468
CD24+ CD27+ B cell %lymphocyte	rs35057381	5	26412301	C	T	0.2211	0.1315	0.02938	3656	7.91808e-06	20.0276
CD24+ CD27+ B cell %lymphocyte	rs4076316	6	167859623	A	T	0.3005	-0.1287	0.027	3656	1.95799e-06	22.7149
CD24+ CD27+ B cell %lymphocyte	rs74505387	6	101891742	C	T	0.1057	-0.1838	0.03954	3656	3.47896e-06	21.6022
CD24+ CD27+ B cell %lymphocyte	rs144625305	7	7871676	T	C	0.0086	0.6284	0.1342	3656	2.94999e-06	21.9204
CD24+ CD27+ B cell %lymphocyte	rs6997704	8	140978857	G	A	0.4707	0.1127	0.02386	3656	2.41102e-06	22.3043
CD24+ CD27+ B cell %lymphocyte	rs1332199	9	9503477	C	T	0.7592	-0.1323	0.02906	3656	5.47797e-06	20.7209
CD24+ CD27+ B cell %lymphocyte	rs144440894	10	53795073	A	G	0.1885	-0.1445	0.03179	3656	5.68002e-06	20.6555
CD24+ CD27+ B cell %lymphocyte	rs6486433	11	9594690	G	T	0.5003	-0.1102	0.02464	3656	7.93999e-06	19.9969
CD24+ CD27+ B cell %lymphocyte	rs4763704	12	11698759	A	G	0.9772	0.3787	0.08058	3656	2.69699e-06	22.0809
CD24+ CD27+ B cell %lymphocyte	rs12829274	12	129349167	G	A	0.0618	-0.2708	0.05111	3656	1.24099e-07	28.0651
CD24+ CD27+ B cell %lymphocyte	rs12874404	13	108993494	G	A	0.3256	0.2114	0.02614	3656	8.08537e-16	65.3853
CD24+ CD27+ B cell %lymphocyte	rs557577736	13	46224092	G	A	0.001	1.814	0.3838	3656	2.37099e-06	22.3329
CD24+ CD27+ B cell %lymphocyte	rs73192651	13	50212885	T	C	0.02	0.5056	0.08768	3656	8.74601e-09	33.2425
CD24+ CD27+ B cell %lymphocyte	rs112782756	13	34506073	G	A	0.0003	2.99	0.6726	3656	8.99104e-06	19.7565
CD24+ CD27+ B cell %lymphocyte	rs9578529	13	23613190	G	A	0.2676	-0.1323	0.02804	3656	2.48502e-06	22.2559
CD24+ CD27+ B cell %lymphocyte	rs77762131	14	96205838	C	G	0.045	0.3074	0.05717	3656	8.06102e-08	28.9036
CD24+ CD27+ B cell %lymphocyte	rs11657759	17	2715961	C	A	0.4903	-0.1352	0.02397	3656	1.80701e-08	31.8052
CD24+ CD27+ B cell %lymphocyte	rs7254039	19	14993354	A	G	0.0435	-0.2739	0.05798	3656	2.398e-06	22.3105
CD20- B cell %lymphocyte	rs6712095	2	205623497	T	G	0.0246	0.3643	0.07946	3657	4.70901e-06	21.0137
CD20- B cell %lymphocyte	rs34625183	3	146097919	T	C	0.1154	-0.1695	0.03789	3657	7.90606e-06	20.0065
CD20- B cell %lymphocyte	rs75951284	3	187638796	T	C	0.0316	0.3067	0.06772	3657	6.11801e-06	20.5057
CD20- B cell %lymphocyte	rs186229706	4	2029089	T	G	0.0142	0.4826	0.1045	3657	3.96598e-06	21.3218
CD20- B cell %lymphocyte	rs4647601	4	185570032	A	C	0.4584	0.1097	0.02451	3657	7.83303e-06	20.0266
CD20- B cell %lymphocyte	rs72791978	5	108070072	T	A	0.01	0.5621	0.1256	3657	7.85001e-06	20.023
CD20- B cell %lymphocyte	rs9273241	6	32614025	T	C	0.5975	0.179	0.0341	3657	1.60801e-07	27.5473
CD20- B cell %lymphocyte	rs7773849	6	128553518	G	A	0.0018	1.534	0.2821	3657	5.81099e-08	29.5615
CD20- B cell %lymphocyte	rs13244540	7	151002534	T	G	0.0447	0.2658	0.0588	3657	6.37602e-06	20.4285
CD20- B cell %lymphocyte	rs38201	7	15911408	A	T	0.2594	-0.1242	0.02794	3657	8.96706e-06	19.7548
CD20- B cell %lymphocyte	rs34313582	8	84919811	A	C	0.138	-0.1598	0.03507	3657	5.39598e-06	20.7569
CD20- B cell %lymphocyte	rs72825207	10	62909955	A	T	0.0149	0.513	0.1061	3657	1.37899e-06	23.3714
CD20- B cell %lymphocyte	rs147937648	12	82008771	T	C	0.0059	-0.7403	0.1583	3657	3.01703e-06	21.8643
CD20- B cell %lymphocyte	rs77553819	13	24882401	C	G	0.2863	-0.1257	0.02688	3657	2.99999e-06	21.8622
CD20- B cell %lymphocyte	rs12432015	14	49052782	C	T	0.118	-0.1712	0.0373	3657	4.56899e-06	21.0606
CD20- B cell %lymphocyte	rs4244568	15	39319915	G	T	0.3414	-0.1244	0.02611	3657	1.98701e-06	22.6939
CD20- B cell %lymphocyte	rs252294	16	29235533	C	G	0.5648	0.1079	0.02418	3657	8.41395e-06	19.9073
CD20- B cell %lymphocyte	rs4782702	16	85477299	G	A	0.9802	0.4085	0.0875	3657	3.145e-06	21.7896
CD20- B cell %lymphocyte	rs11662133	18	74434633	C	T	0.1705	0.1453	0.03219	3657	6.52199e-06	20.369
CD20- B cell %lymphocyte	rs186355283	20	46615708	T	C	0.0077	0.6312	0.1414	3657	8.27104e-06	19.9212
CD20- B cell %lymphocyte	rs6052993	20	4944838	G	C	0.4371	-0.1132	0.02459	3657	4.25197e-06	21.1864
CD20- CD38- B cell %lymphocyte	rs75839951	2	34491589	G	T	0.0585	-0.2457	0.05199	3658	2.38199e-06	22.3281
CD20- CD38- B cell %lymphocyte	rs4619804	3	18674644	C	A	0.6963	0.1217	0.02734	3658	8.77991e-06	19.8091
CD20- CD38- B cell %lymphocyte	rs709082	3	191447446	C	A	0.3682	0.1135	0.02504	3658	6.03698e-06	20.5402
CD20- CD38- B cell %lymphocyte	rs2215848	4	25065221	A	G	0.0118	0.5046	0.1124	3658	7.40901e-06	20.1485
CD20- CD38- B cell %lymphocyte	rs182720746	4	113092883	T	C	0.0089	0.6295	0.1319	3658	1.88599e-06	22.7711
CD20- CD38- B cell %lymphocyte	rs62311900	4	74145187	T	C	0.1736	-0.1405	0.03168	3658	9.44191e-06	19.6636
CD20- CD38- B cell %lymphocyte	rs2339996	5	173070505	A	G	0.7802	-0.1476	0.02879	3658	3.12299e-07	26.2767
CD20- CD38- B cell %lymphocyte	rs72492305	6	32509333	T	C	0.6662	0.2022	0.0416	3658	1.21899e-06	23.6187
CD20- CD38- B cell %lymphocyte	rs6906886	6	85038851	A	T	0.903	0.1807	0.04053	3658	8.55008e-06	19.8721
CD20- CD38- B cell %lymphocyte	rs10279688	7	9851008	T	C	0.0115	0.4968	0.1101	3658	6.54199e-06	20.3549
CD20- CD38- B cell %lymphocyte	rs11203884	8	17516564	T	C	0.1643	-0.1469	0.03262	3658	6.83502e-06	20.2748
CD20- CD38- B cell %lymphocyte	rs118073973	9	19948908	A	T	0.0402	0.2924	0.06168	3658	2.20999e-06	22.4671
CD20- CD38- B cell %lymphocyte	rs55767134	10	17048435	C	G	0.1837	-0.1443	0.03132	3658	4.19402e-06	21.2212
CD20- CD38- B cell %lymphocyte	rs308820	11	88142031	C	T	0.7571	-0.1261	0.02837	3658	8.97491e-06	19.7512
CD20- CD38- B cell %lymphocyte	rs34666228	11	123385425	T	G	0.2346	0.1512	0.02817	3658	8.46292e-08	28.8012
CD20- CD38- B cell %lymphocyte	rs78301150	12	82233392	A	G	0.0033	-1.031	0.2228	3658	3.84698e-06	21.4076
CD20- CD38- B cell %lymphocyte	rs117308259	14	31993501	C	T	0.0066	-0.7613	0.1499	3658	4.02096e-07	25.7863
CD20- CD38- B cell %lymphocyte	rs35639639	16	5488091	C	T	0.2063	0.1354	0.03002	3658	6.72295e-06	20.3375
CD20- CD38- B cell %lymphocyte	rs111737298	17	52847291	G	A	0.0596	0.2263	0.05029	3658	7.01407e-06	20.2436
CD20- CD38- B cell %lymphocyte	rs16955339	17	52971060	T	G	0.0377	0.3075	0.06234	3658	8.46292e-07	24.3242
CD20- CD38- B cell %lymphocyte	rs77510701	18	34838106	A	C	0.0484	-0.2605	0.05636	3658	3.92103e-06	21.3577
CD20- CD38- B cell %lymphocyte	rs80339814	19	53396009	C	T	0.0794	-0.2259	0.04752	3658	2.07501e-06	22.5923
CD20- CD38- B cell %lymphocyte	rs6125184	20	46576714	A	G	0.5914	-0.1164	0.02472	3658	2.60699e-06	22.1661
CD20- CD38- B cell %lymphocyte	rs59902361	20	38334734	A	G	0.0496	-0.2517	0.05532	3658	5.53898e-06	20.6959
CD20- CD38- B cell %lymphocyte	rs36071180	20	765164	A	G	0.1597	0.1556	0.03334	3658	3.19198e-06	21.7756
IgD- CD38- B cell %B cell	rs61790670	1	84127219	A	C	0.2301	0.1305	0.02908	3657	7.44801e-06	20.1332
IgD- CD38- B cell %B cell	rs115576360	4	156996644	A	G	0.0194	-0.4062	0.09082	3657	7.96196e-06	19.9985
IgD- CD38- B cell %B cell	rs4691920	4	164351901	C	G	0.9962	-0.9757	0.207	3657	2.53303e-06	22.2113
IgD- CD38- B cell %B cell	rs7726548	5	116807553	G	T	0.103	-0.1903	0.04045	3657	2.64503e-06	22.127
IgD- CD38- B cell %B cell	rs17405603	5	144608340	T	A	0.2841	-0.1414	0.02769	3657	3.47296e-07	26.0696
IgD- CD38- B cell %B cell	rs62417843	6	91779902	C	T	0.0502	-0.2629	0.05605	3657	2.82299e-06	21.9944
IgD- CD38- B cell %B cell	rs9265864	6	31312747	T	C	0.4642	-0.1444	0.03125	3657	3.97997e-06	21.346
IgD- CD38- B cell %B cell	rs2450220	8	119323401	T	C	0.816	0.1668	0.03177	3657	1.60801e-07	27.5574
IgD- CD38- B cell %B cell	rs140191306	9	2570753	T	C	0.0179	-0.4466	0.09399	3657	2.09701e-06	22.5712
IgD- CD38- B cell %B cell	rs138977782	9	4744416	G	A	0.0096	-0.5468	0.1228	3657	8.74802e-06	19.8217
IgD- CD38- B cell %B cell	rs11068290	12	110228055	T	C	0.0231	-0.3746	0.0813	3657	4.21105e-06	21.2244
IgD- CD38- B cell %B cell	rs7994585	13	111083495	C	G	0.4839	-0.1137	0.02485	3657	4.94504e-06	20.929
IgD- CD38- B cell %B cell	rs7215243	17	78261805	G	A	0.1328	0.1743	0.03642	3657	1.77501e-06	22.8979
IgD- CD38- B cell Absolute Count	rs77146037	1	178195174	G	A	0.0472	-0.2726	0.05953	3656	4.81903e-06	20.9634
IgD- CD38- B cell Absolute Count	rs61790670	1	84127219	A	C	0.23	0.142	0.0294	3656	1.409e-06	23.3219
IgD- CD38- B cell Absolute Count	rs114551034	2	66709035	A	G	0.0509	-0.2926	0.05767	3656	4.08404e-07	25.7353
IgD- CD38- B cell Absolute Count	rs115218350	3	104146883	A	T	0.0008	-1.898	0.408	3656	3.408e-06	21.6348
IgD- CD38- B cell Absolute Count	rs112964950	3	73697496	C	G	0.0083	0.6003	0.1354	3656	9.57194e-06	19.6508
IgD- CD38- B cell Absolute Count	rs75524570	3	191905058	C	T	0.0673	0.2161	0.04856	3656	8.81698e-06	19.7985
IgD- CD38- B cell Absolute Count	rs56741207	4	134733663	G	C	0.0018	-1.445	0.2907	3656	7.03704e-07	24.7017
IgD- CD38- B cell Absolute Count	rs4697617	4	25771115	A	G	0.7103	0.1401	0.02742	3656	3.38602e-07	26.0989
IgD- CD38- B cell Absolute Count	rs144625305	7	7871676	T	C	0.0086	0.6143	0.1381	3656	8.95695e-06	19.7813
IgD- CD38- B cell Absolute Count	rs62521107	8	118851954	T	C	0.058	-0.2685	0.05455	3656	8.90902e-07	24.2203
IgD- CD38- B cell Absolute Count	rs118121266	10	20380753	T	C	0.0055	0.7592	0.1675	3656	6.02296e-06	20.5383
IgD- CD38- B cell Absolute Count	rs79416092	12	6775503	C	T	0.0197	-0.4181	0.0925	3656	6.38807e-06	20.4248
IgD- CD38- B cell Absolute Count	rs421516	17	63135589	A	C	0.9583	-0.3138	0.06366	3656	8.60399e-07	24.2915
IgD- CD38- B cell Absolute Count	rs77741094	21	42362418	G	C	0.0126	-0.627	0.1131	3656	3.13899e-08	30.7249
IgD- CD38- B cell Absolute Count	rs144295598	22	45164171	A	G	0.0103	0.5677	0.1226	3656	3.77703e-06	21.4357
IgD+ CD38+ B cell %B cell	rs74907325	1	218429679	T	A	0.0666	0.2307	0.04822	3657	1.793e-06	22.8835
IgD+ CD38+ B cell %B cell	rs76084861	2	16114539	T	G	0.0368	0.2748	0.06192	3657	9.3821e-06	19.6903
IgD+ CD38+ B cell %B cell	rs16867231	2	181050023	A	G	0.0108	-0.547	0.1138	3657	1.60199e-06	23.0978
IgD+ CD38+ B cell %B cell	rs140380950	2	105587803	C	T	0.0368	-0.3401	0.06356	3657	9.31001e-08	28.6238
IgD+ CD38+ B cell %B cell	rs76112278	4	15915069	A	G	0.0194	-0.4136	0.08735	3657	2.26699e-06	22.4138
IgD+ CD38+ B cell %B cell	rs28393044	4	157437839	G	C	0.0334	0.3089	0.06706	3657	4.24502e-06	21.2124
IgD+ CD38+ B cell %B cell	rs78658073	5	498773	A	G	0.001	1.714	0.3719	3657	4.15796e-06	21.2349
IgD+ CD38+ B cell %B cell	rs139996875	5	78010341	T	A	0.0063	0.6715	0.1465	3657	4.689e-06	21.0038
IgD+ CD38+ B cell %B cell	rs13196511	6	44643196	A	G	0.0913	-0.2113	0.04244	3657	6.72094e-07	24.7816
IgD+ CD38+ B cell %B cell	rs117772462	7	48791017	A	T	0.0159	-0.4299	0.0963	3657	8.29602e-06	19.9234
IgD+ CD38+ B cell %B cell	rs17739715	8	9957457	C	A	0.0037	0.8693	0.196	3657	9.46303e-06	19.6657
IgD+ CD38+ B cell %B cell	rs17771512	8	120047880	A	C	0.0928	-0.188	0.04163	3657	6.49995e-06	20.3884
IgD+ CD38+ B cell %B cell	rs57998613	9	93109339	A	T	0.0156	0.4342	0.0961	3657	6.42407e-06	20.4086
IgD+ CD38+ B cell %B cell	rs28491938	9	41980474	T	C	0.1922	0.1803	0.04053	3657	8.87892e-06	19.7842
IgD+ CD38+ B cell %B cell	rs11002952	10	81145177	A	G	0.0023	-1.169	0.2589	3657	6.53296e-06	20.382
IgD+ CD38+ B cell %B cell	rs2362966	10	125560687	C	G	0.0556	-0.2556	0.05243	3657	1.137e-06	23.7598
IgD+ CD38+ B cell %B cell	rs35060907	10	132636158	T	G	0.1036	-0.1953	0.04025	3657	1.277e-06	23.5372
IgD+ CD38+ B cell %B cell	rs61880664	11	15343532	G	A	0.1389	0.1564	0.03506	3657	8.43898e-06	19.8944
IgD+ CD38+ B cell %B cell	rs11068290	12	110228055	T	C	0.0231	0.3556	0.07908	3657	7.12607e-06	20.2149
IgD+ CD38+ B cell %B cell	rs59879144	12	75564449	A	C	0.0161	-0.4658	0.09637	3657	1.39801e-06	23.3559
IgD+ CD38+ B cell %B cell	rs4903967	14	81485149	A	G	0.6906	-0.1368	0.02733	3657	5.77697e-07	25.0481
IgD+ CD38+ B cell %B cell	rs17278914	14	44595691	C	T	0.0057	-0.676	0.1517	3657	8.603e-06	19.852
IgD+ CD38+ B cell %B cell	rs76840770	14	54814017	A	C	0.0246	0.3538	0.07769	3657	5.42101e-06	20.7332
IgD+ CD38+ B cell %B cell	rs79487320	14	43717096	G	C	0.0074	-0.6854	0.1392	3657	8.87708e-07	24.2377
IgD+ CD38+ B cell %B cell	rs147226531	16	54686774	C	T	0.0115	0.517	0.115	3657	7.20593e-06	20.2054
IgD+ CD38+ B cell %B cell	rs2216762	16	84759446	C	T	0.8141	-0.1464	0.03092	3657	2.26199e-06	22.4122
IgD+ CD38+ B cell %B cell	rs8059803	16	81603001	A	G	0.6504	-0.122	0.02577	3657	2.28802e-06	22.4064
IgD+ CD38+ B cell %B cell	rs72927038	18	51760939	T	C	0.0335	-0.33	0.06793	3657	1.237e-06	23.5931
CD11c+ monocyte Absolute Count	rs114693598	1	161500712	T	G	0.1422	-0.1756	0.03803	3020	4.05602e-06	21.3134
CD11c+ monocyte Absolute Count	rs2404849	1	224272792	G	T	0.7464	0.1562	0.03041	3020	2.98003e-07	26.3746
CD11c+ monocyte Absolute Count	rs72724781	1	89327063	G	A	0.0041	0.9648	0.2024	3020	1.95299e-06	22.7148
CD11c+ monocyte Absolute Count	rs3040901	2	79926958	T	C	0.2225	-0.1552	0.03359	3020	3.97796e-06	21.3412
CD11c+ monocyte Absolute Count	rs74610143	3	172744541	T	C	0.0124	0.5582	0.1246	3020	7.76909e-06	20.0632
CD11c+ monocyte Absolute Count	rs13104041	4	173569449	A	G	0.0073	0.6966	0.1566	3020	9.01405e-06	19.7806
CD11c+ monocyte Absolute Count	rs72835655	5	167349999	T	G	0.0594	0.2511	0.05647	3020	9.04503e-06	19.7658
CD11c+ monocyte Absolute Count	rs2295270	6	47216562	A	G	0.1901	0.1506	0.03397	3020	9.64695e-06	19.6478
CD11c+ monocyte Absolute Count	rs151194174	7	20995778	A	G	0.0305	-0.3546	0.07814	3020	5.91902e-06	20.5867
CD11c+ monocyte Absolute Count	rs2587473	10	72515785	T	C	0.2432	-0.1429	0.0311	3020	4.55198e-06	21.1057
CD11c+ monocyte Absolute Count	rs72830905	10	85138481	G	C	0.0058	0.8103	0.1783	3020	5.73905e-06	20.6464
CD11c+ monocyte Absolute Count	rs34936922	12	115758242	G	T	0.3124	-0.1256	0.02836	3020	9.7681e-06	19.6075
CD11c+ monocyte Absolute Count	rs113800324	12	69766606	T	C	0.05	0.2681	0.05996	3020	8.051e-06	19.986
CD11c+ monocyte Absolute Count	rs9894233	17	45778747	A	T	0.0268	-0.3991	0.08574	3020	3.38197e-06	21.6597
CD11c+ monocyte Absolute Count	rs113451095	17	9975038	C	T	0.0472	-0.2994	0.06307	3020	2.16601e-06	22.5276
CD11c+ monocyte Absolute Count	rs73445777	18	46954097	G	T	0.0151	-0.4778	0.1053	3020	5.93103e-06	20.5822
CD11c+ monocyte Absolute Count	rs8175830	19	27851156	A	G	0.0919	-0.2321	0.05209	3020	8.62402e-06	19.8471
CD11c+ monocyte Absolute Count	rs150248455	21	46373171	A	G	0.0674	0.25	0.05201	3020	1.59901e-06	23.0974
CD11c+ monocyte %monocyte	rs191730825	1	46613239	G	A	0.0292	0.4346	0.08042	3043	7.006e-08	29.195
CD11c+ monocyte %monocyte	rs115058278	3	101915678	A	T	0.0168	0.4772	0.1021	3043	3.10699e-06	21.8377
CD11c+ monocyte %monocyte	rs74610143	3	172744541	T	C	0.0125	0.6366	0.1245	3043	3.36597e-07	26.1368
CD11c+ monocyte %monocyte	rs11921245	3	65576520	C	T	0.1456	0.1661	0.03726	3043	8.53395e-06	19.866
CD11c+ monocyte %monocyte	rs35237330	4	182768743	A	G	0.0971	-0.2147	0.04484	3043	1.76901e-06	22.9187
CD11c+ monocyte %monocyte	rs13186506	5	59111915	T	A	0.104	-0.1934	0.04296	3043	6.99697e-06	20.2601
CD11c+ monocyte %monocyte	rs75256410	5	176914227	T	C	0.0122	0.545	0.1202	3043	6.05494e-06	20.5514
CD11c+ monocyte %monocyte	rs13241407	7	153684820	G	A	0.0483	-0.28	0.06121	3043	4.94698e-06	20.9184
CD11c+ monocyte %monocyte	rs11766273	7	22775663	A	G	0.0115	0.591	0.1283	3043	4.23399e-06	21.2119
CD11c+ monocyte %monocyte	rs10227905	7	122075261	G	T	0.3971	0.1214	0.0271	3043	7.70602e-06	20.0612
CD11c+ monocyte %monocyte	rs73073066	7	23486970	T	C	0.023	0.4148	0.08775	3043	2.377e-06	22.3378
CD11c+ monocyte %monocyte	rs17689291	8	94037230	C	G	0.0107	-0.575	0.1295	3043	9.29694e-06	19.7085
CD11c+ monocyte %monocyte	rs4922033	8	19326303	T	C	0.3899	0.1211	0.02694	3043	7.22404e-06	20.2
CD11c+ monocyte %monocyte	rs703009	10	26889823	T	C	0.1687	-0.1616	0.03583	3043	6.72992e-06	20.3351
CD11c+ monocyte %monocyte	rs11610005	12	27966210	G	C	0.4358	-0.124	0.02698	3043	4.532e-06	21.1162
CD11c+ monocyte %monocyte	rs57566659	12	42973243	C	G	0.0462	0.3158	0.06253	3043	4.66702e-07	25.4979
CD11c+ monocyte %monocyte	rs76968110	14	31160823	A	G	0.0189	-0.4763	0.0957	3043	6.82402e-07	24.7625
CD11c+ monocyte %monocyte	rs117909439	14	29918210	T	C	0.0089	-0.6761	0.1414	3043	1.81201e-06	22.8549
CD11c+ monocyte %monocyte	rs62002392	15	37200279	G	A	0.1119	0.1924	0.04225	3043	5.50605e-06	20.7307
CD11c+ monocyte %monocyte	rs16952634	16	53934556	A	G	0.1032	-0.1936	0.04368	3043	9.61789e-06	19.6382
CD11c+ monocyte %monocyte	rs8065103	17	45062476	G	A	0.7212	0.1465	0.02963	3043	8.10793e-07	24.4382
CD11c+ monocyte %monocyte	rs1381984	20	52655304	A	G	0.1661	-0.1569	0.0349	3043	7.19598e-06	20.2047
CD11c+ monocyte %monocyte	rs35149557	20	5421681	C	T	0.198	0.1579	0.03301	3043	1.79602e-06	22.8734
CD62L- monocyte Absolute Count	rs4656708	1	169701466	C	A	0.0459	-0.3696	0.0647	3019	1.21801e-08	32.6221
CD62L- monocyte Absolute Count	rs4987369	1	169662742	T	G	0.2774	0.2378	0.03006	3019	3.6116e-15	62.5607
CD62L- monocyte Absolute Count	rs62167331	2	56524393	A	G	0.0341	-0.347	0.07464	3019	3.47896e-06	21.6059
CD62L- monocyte Absolute Count	rs13068785	3	74703663	T	C	0.0581	0.269	0.05861	3019	4.61604e-06	21.058
CD62L- monocyte Absolute Count	rs1907980	4	4859590	T	G	0.3596	0.1274	0.02798	3019	5.45205e-06	20.7252
CD62L- monocyte Absolute Count	rs11935230	4	136447876	C	G	0.1686	0.1842	0.03607	3019	3.498e-07	26.0701
CD62L- monocyte Absolute Count	rs278949	4	40461712	A	G	0.5561	0.1235	0.02741	3019	6.86894e-06	20.2942
CD62L- monocyte Absolute Count	rs17082777	4	63361327	A	G	0.1014	-0.2033	0.04515	3019	6.95505e-06	20.2682
CD62L- monocyte Absolute Count	rs11249570	5	177033794	A	G	0.4581	-0.1525	0.02632	3019	7.66302e-09	33.5602
CD62L- monocyte Absolute Count	rs79930588	5	6308011	G	T	0.0015	1.724	0.3525	3019	1.048e-06	23.9118
CD62L- monocyte Absolute Count	rs528135834	7	41362245	G	T	0.0056	0.859	0.1829	3019	2.75201e-06	22.0503
CD62L- monocyte Absolute Count	rs4484736	8	66059237	A	G	0.7173	-0.1386	0.03012	3019	4.36797e-06	21.1676
CD62L- monocyte Absolute Count	rs530377	9	135337621	C	T	0.2211	0.1627	0.03256	3019	6.12506e-07	24.961
CD62L- monocyte Absolute Count	rs143153359	9	76145588	T	C	0.0013	2.05	0.4039	3019	4.11898e-07	25.7523
CD62L- monocyte Absolute Count	rs77287889	10	89954638	A	G	0.0301	0.352	0.07927	3019	9.29694e-06	19.7117
CD62L- monocyte Absolute Count	rs116691483	11	111990120	A	G	0.0235	0.3974	0.0895	3019	9.3261e-06	19.7091
CD62L- monocyte Absolute Count	rs1800973	12	69744014	A	C	0.083	0.222	0.04861	3019	5.12201e-06	20.8502
CD62L- monocyte Absolute Count	rs4899265	14	69321561	C	A	0.3475	0.139	0.02858	3019	1.213e-06	23.6462
CD62L- monocyte Absolute Count	rs146793376	16	31775655	G	T	0.0171	0.4639	0.104	3019	8.43801e-06	19.8902
CD62L- monocyte Absolute Count	rs435806	19	2993427	C	T	0.2448	-0.1417	0.03127	3019	6.08303e-06	20.5277
CD62L- monocyte Absolute Count	rs149543954	20	15302488	T	G	0.0517	0.295	0.06108	3019	1.434e-06	23.3186
CD62L- monocyte %monocyte	rs4987360	1	169664867	G	A	0.2763	0.3359	0.02969	3042	4.36918e-29	127.955
CD62L- monocyte %monocyte	rs4656708	1	169701466	C	A	0.0457	-0.3294	0.06481	3042	3.93496e-07	25.8238
CD62L- monocyte %monocyte	rs141287837	1	99082513	C	T	0.0306	0.3492	0.07853	3042	9.03005e-06	19.7667
CD62L- monocyte %monocyte	rs11694457	2	356029	C	T	0.0113	0.5758	0.1297	3042	9.34609e-06	19.7025
CD62L- monocyte %monocyte	rs9824107	3	174360449	A	C	0.106	-0.1976	0.04346	3042	5.66304e-06	20.6658
CD62L- monocyte %monocyte	rs62236339	3	16446085	A	T	0.0769	0.228	0.05043	3042	6.40295e-06	20.4338
CD62L- monocyte %monocyte	rs9859349	3	31661754	A	G	0.1205	0.227	0.04151	3042	4.89204e-08	29.8953
CD62L- monocyte %monocyte	rs36141595	4	32848987	G	A	0.2516	-0.1512	0.03196	3042	2.34002e-06	22.3742
CD62L- monocyte %monocyte	rs1816932	4	56771414	A	G	0.2855	0.1467	0.02962	3042	7.76694e-07	24.5215
CD62L- monocyte %monocyte	rs17624563	5	110456263	G	C	0.0569	-0.2904	0.05766	3042	5.01695e-07	25.3572
CD62L- monocyte %monocyte	rs11249570	5	177033794	A	G	0.4578	-0.1315	0.02634	3042	6.29506e-07	24.9159
CD62L- monocyte %monocyte	rs2399610	5	5737796	G	A	0.4988	-0.1315	0.02718	3042	1.37101e-06	23.3997
CD62L- monocyte %monocyte	rs76717104	7	17644035	T	C	0.0155	0.4905	0.109	3042	7.02005e-06	20.2433
CD62L- monocyte %monocyte	rs717824	7	14032498	T	C	0.0396	-0.3108	0.06924	3042	7.45195e-06	20.1421
CD62L- monocyte %monocyte	rs2124027	8	14941111	G	C	0.0212	-0.4256	0.09413	3042	6.38602e-06	20.4364
CD62L- monocyte %monocyte	rs530377	9	135337621	C	T	0.2206	0.1614	0.03252	3042	7.28199e-07	24.6243
CD62L- monocyte %monocyte	rs117765367	11	2024995	T	C	0.0403	0.2982	0.06733	3042	9.82404e-06	19.609
CD62L- monocyte %monocyte	rs7139370	13	109976273	T	C	0.0676	0.2947	0.0539	3042	4.96295e-08	29.8841
CD62L- monocyte %monocyte	rs117309559	14	31030304	G	A	0.013	0.5719	0.1203	3042	2.071e-06	22.5926
CD62L- monocyte %monocyte	rs4899389	14	71667863	A	G	0.132	-0.1913	0.03943	3042	1.281e-06	23.5306
CD62L- monocyte %monocyte	rs45487297	14	30153119	A	T	0.0135	0.6623	0.1201	3042	3.74498e-08	30.4005
CD62L- monocyte %monocyte	rs7150584	14	58316355	T	C	0.1624	-0.1787	0.03646	3042	9.95497e-07	24.0145
CD62L- monocyte %monocyte	rs9807014	17	76108637	T	C	0.1333	-0.2057	0.0397	3042	2.34498e-07	26.8377
CD62L- monocyte %monocyte	rs9944612	18	60116421	A	C	0.283	0.1341	0.0294	3042	5.30897e-06	20.7979
CD62L- monocyte %monocyte	rs55859756	22	37139371	C	G	0.0866	0.2127	0.04782	3042	8.93696e-06	19.7776
CD11c+ CD62L- monocyte Absolute Count	rs2404849	1	224272792	G	T	0.7463	0.1532	0.03003	3017	3.597e-07	26.0173
CD11c+ CD62L- monocyte Absolute Count	rs1407142	1	86940820	C	T	0.9123	0.201	0.04538	3017	9.81296e-06	19.6119
CD11c+ CD62L- monocyte Absolute Count	rs55971447	1	161515326	T	C	0.231	-0.1809	0.03084	3017	4.94698e-09	34.3957
CD11c+ CD62L- monocyte Absolute Count	rs72660177	1	34019363	T	C	0.1018	-0.2006	0.04321	3017	3.60903e-06	21.5451
CD11c+ CD62L- monocyte Absolute Count	rs72724781	1	89327063	G	A	0.0041	0.9448	0.2002	3017	2.46899e-06	22.2642
CD11c+ CD62L- monocyte Absolute Count	rs3040901	2	79926958	T	C	0.2224	-0.1559	0.03322	3017	2.80802e-06	22.0165
CD11c+ CD62L- monocyte Absolute Count	rs13104041	4	173569449	A	G	0.0073	0.7057	0.155	3017	5.49604e-06	20.7221
CD11c+ CD62L- monocyte Absolute Count	rs72835655	5	167349999	T	G	0.0595	0.2484	0.05589	3017	9.1071e-06	19.7465
CD11c+ CD62L- monocyte Absolute Count	rs75220521	6	81660130	G	T	0.002	-1.36	0.2904	3017	2.947e-06	21.925
CD11c+ CD62L- monocyte Absolute Count	rs11772116	7	23594922	C	G	0.0766	0.225	0.04872	3017	4.02402e-06	21.3209
CD11c+ CD62L- monocyte Absolute Count	rs1268974	10	80852378	G	A	0.5486	0.117	0.02571	3017	5.50795e-06	20.7025
CD11c+ CD62L- monocyte Absolute Count	rs11213272	11	109986288	G	A	0.027	0.3583	0.08017	3017	8.13299e-06	19.9676
CD11c+ CD62L- monocyte Absolute Count	rs12277397	11	134569102	T	G	0.1178	0.1808	0.0396	3017	5.15395e-06	20.8383
CD11c+ CD62L- monocyte Absolute Count	rs10891433	11	112642209	T	A	0.3378	-0.1217	0.02721	3017	7.99392e-06	19.9977
CD11c+ CD62L- monocyte Absolute Count	rs76524078	12	26355696	A	G	0.0023	1.307	0.2836	3017	4.24004e-06	21.2322
CD11c+ CD62L- monocyte Absolute Count	rs113800324	12	69766606	T	C	0.05	0.3099	0.05911	3017	1.68298e-07	27.4775
CD11c+ CD62L- monocyte Absolute Count	rs17474599	13	100593548	T	C	0.0146	-0.5233	0.1093	3017	1.76498e-06	22.9149
CD11c+ CD62L- monocyte Absolute Count	rs77694582	14	102895904	A	G	0.0746	-0.2264	0.0505	3017	7.66002e-06	20.0921
CD11c+ CD62L- monocyte Absolute Count	rs4899265	14	69321561	C	A	0.3474	0.1241	0.02747	3017	6.43902e-06	20.4024
CD11c+ CD62L- monocyte Absolute Count	rs4359381	15	61748527	C	G	0.06	0.2509	0.0547	3017	4.70002e-06	21.0321
CD11c+ CD62L- monocyte Absolute Count	rs12708874	16	66062093	T	A	0.7957	-0.1526	0.03262	3017	3.00898e-06	21.8775
CD11c+ CD62L- monocyte Absolute Count	rs9894233	17	45778747	A	T	0.0268	-0.4108	0.08485	3017	1.355e-06	23.4322
CD11c+ CD62L- monocyte Absolute Count	rs34142458	17	2792530	G	A	0.8397	-0.1581	0.03498	3017	6.42096e-06	20.4211
CD11c+ CD62L- monocyte Absolute Count	rs150248455	21	46373171	A	G	0.0673	0.2439	0.05149	3017	2.273e-06	22.4302
CD11c+ CD62L- monocyte Absolute Count	rs117545845	22	25622885	T	C	0.121	0.1774	0.03948	3017	7.29693e-06	20.1841
CD11c+ CD62L- monocyte %monocyte	rs116249234	1	56894640	A	G	0.0661	0.245	0.0552	3040	9.3981e-06	19.693
CD11c+ CD62L- monocyte %monocyte	rs80087840	1	17966505	A	G	0.0105	-0.6187	0.1345	3040	4.36999e-06	21.153
CD11c+ CD62L- monocyte %monocyte	rs191730825	1	46613239	G	A	0.0293	0.3846	0.08124	3040	2.30399e-06	22.4045
CD11c+ CD62L- monocyte %monocyte	rs10924239	1	245721841	A	G	0.0993	0.207	0.04455	3040	3.51601e-06	21.5825
CD11c+ CD62L- monocyte %monocyte	rs114693598	1	161500712	T	G	0.1418	-0.195	0.03862	3040	4.68296e-07	25.486
CD11c+ CD62L- monocyte %monocyte	rs114857887	2	47354461	A	G	0.0673	0.2479	0.05444	3040	5.49503e-06	20.7288
CD11c+ CD62L- monocyte %monocyte	rs10804278	2	220533049	T	C	0.387	0.1244	0.02742	3040	5.93595e-06	20.5761
CD11c+ CD62L- monocyte %monocyte	rs74610143	3	172744541	T	C	0.0125	0.5956	0.1263	3040	2.52203e-06	22.231
CD11c+ CD62L- monocyte %monocyte	rs11921245	3	65576520	C	T	0.1456	0.1689	0.03761	3040	7.32302e-06	20.1609
CD11c+ CD62L- monocyte %monocyte	rs138567833	4	182783833	A	G	0.0895	-0.2161	0.0466	3040	3.68697e-06	21.4978
CD11c+ CD62L- monocyte %monocyte	rs13241407	7	153684820	G	A	0.0482	-0.2769	0.0616	3040	7.23003e-06	20.1995
CD11c+ CD62L- monocyte %monocyte	rs73073066	7	23486970	T	C	0.0229	0.4544	0.08893	3040	3.42997e-07	26.0998
CD11c+ CD62L- monocyte %monocyte	rs4922033	8	19326303	T	C	0.3901	0.1227	0.02728	3040	7.18208e-06	20.2236
CD11c+ CD62L- monocyte %monocyte	rs1469503	11	112076693	T	A	0.9564	0.2989	0.06464	3040	3.90796e-06	21.375
CD11c+ CD62L- monocyte %monocyte	rs57566659	12	42973243	C	G	0.0462	0.3077	0.06328	3040	1.21599e-06	23.6363
CD11c+ CD62L- monocyte %monocyte	rs1800973	12	69744014	A	C	0.0831	0.25	0.04806	3040	2.10999e-07	27.0501
CD11c+ CD62L- monocyte %monocyte	rs11610005	12	27966210	G	C	0.4359	-0.1298	0.02728	3040	2.053e-06	22.6317
CD11c+ CD62L- monocyte %monocyte	rs117909439	14	29918210	T	C	0.0089	-0.6373	0.1427	3040	8.25392e-06	19.9387
CD11c+ CD62L- monocyte %monocyte	rs62002392	15	37200279	G	A	0.1118	0.1991	0.04263	3040	3.12097e-06	21.8056
CD11c+ CD62L- monocyte %monocyte	rs16952634	16	53934556	A	G	0.1033	-0.1976	0.04413	3040	7.81592e-06	20.043
CD11c+ CD62L- monocyte %monocyte	rs4468691	17	45064678	G	A	0.7286	0.1484	0.03016	3040	9.12998e-07	24.2026
CD62L- HLA DR++ monocyte Absolute Count	rs74805957	2	112941273	T	C	0.0396	0.3042	0.06703	3018	5.90704e-06	20.589
CD62L- HLA DR++ monocyte Absolute Count	rs115431394	3	1641354	C	A	0.0096	0.5986	0.134	3018	8.26704e-06	19.9489
CD62L- HLA DR++ monocyte Absolute Count	rs1320172	3	61569753	T	C	0.2179	0.1401	0.03165	3018	9.92293e-06	19.5878
CD62L- HLA DR++ monocyte Absolute Count	rs111224423	4	1531162	G	C	0.0409	-0.2927	0.06581	3018	8.97697e-06	19.7751
CD62L- HLA DR++ monocyte Absolute Count	rs7437802	4	148180897	T	C	0.6269	-0.1209	0.02713	3018	8.65307e-06	19.8522
CD62L- HLA DR++ monocyte Absolute Count	rs3797612	5	178631699	C	T	0.4606	0.1137	0.02564	3018	9.52906e-06	19.6581
CD62L- HLA DR++ monocyte Absolute Count	rs10948829	6	54476928	G	A	0.0911	-0.2094	0.0463	3018	6.346e-06	20.4478
CD62L- HLA DR++ monocyte Absolute Count	rs10759491	9	113852341	T	C	0.4032	-0.1197	0.02688	3018	8.75004e-06	19.8237
CD62L- HLA DR++ monocyte Absolute Count	rs10980077	9	112600304	A	G	0.3118	-0.1284	0.0283	3018	5.89794e-06	20.5785
CD62L- HLA DR++ monocyte Absolute Count	rs10887149	10	124167004	A	G	0.3101	0.1276	0.02858	3018	8.36392e-06	19.9266
CD62L- HLA DR++ monocyte Absolute Count	rs28680389	11	134566275	A	G	0.0747	0.2396	0.04966	3018	1.47299e-06	23.2711
CD62L- HLA DR++ monocyte Absolute Count	rs938447	12	108746427	C	T	0.6473	0.1364	0.02743	3018	6.93905e-07	24.7191
CD62L- HLA DR++ monocyte Absolute Count	rs148420500	13	76034172	A	G	0.0209	-0.4212	0.08981	3018	2.86398e-06	21.9879
CD62L- HLA DR++ monocyte Absolute Count	rs4899265	14	69321561	C	A	0.3474	0.1267	0.02759	3018	4.52699e-06	21.0817
CD62L- HLA DR++ monocyte Absolute Count	rs139554006	14	53831558	A	G	0.0255	0.3934	0.08287	3018	2.16501e-06	22.5284
CD62L- HLA DR++ monocyte Absolute Count	rs144348353	15	88341038	T	G	0.0295	0.3569	0.07891	3018	6.31393e-06	20.4496
CD62L- HLA DR++ monocyte Absolute Count	rs7190107	16	50273295	A	T	0.2169	-0.1416	0.03148	3018	7.05992e-06	20.2261
CD62L- HLA DR++ monocyte Absolute Count	rs2240899	18	3595011	C	G	0.6678	-0.1231	0.02767	3018	8.88505e-06	19.7858
CD62L- HLA DR++ monocyte Absolute Count	rs117545845	22	25622885	T	C	0.1209	0.1995	0.03962	3018	5.04696e-07	25.3462
CD62L- HLA DR++ monocyte %monocyte	rs76234991	1	89120861	T	A	0.0178	0.4559	0.1027	3041	9.40005e-06	19.6995
CD62L- HLA DR++ monocyte %monocyte	rs9919190	1	165676784	G	C	0.271	-0.1352	0.02971	3041	5.52993e-06	20.7017
CD62L- HLA DR++ monocyte %monocyte	rs4668750	2	12351867	A	G	0.0524	0.2764	0.05873	3041	2.63299e-06	22.1418
CD62L- HLA DR++ monocyte %monocyte	rs6430066	2	145504787	C	T	0.329	0.1271	0.02872	3041	9.97493e-06	19.5785
CD62L- HLA DR++ monocyte %monocyte	rs356651	2	101541798	T	C	0.8576	-0.176	0.03878	3041	5.87801e-06	20.5905
CD62L- HLA DR++ monocyte %monocyte	rs2955643	3	9386094	A	G	0.4513	0.1248	0.02633	3041	2.23501e-06	22.4587
CD62L- HLA DR++ monocyte %monocyte	rs12485444	3	188135783	A	T	0.4742	0.1287	0.02682	3041	1.67302e-06	23.0195
CD62L- HLA DR++ monocyte %monocyte	rs151240896	3	9228763	G	A	0.0702	-0.2473	0.0512	3041	1.42699e-06	23.322
CD62L- HLA DR++ monocyte %monocyte	rs189575603	4	83340880	C	T	0.0059	-0.8168	0.1726	3041	2.31499e-06	22.3876
CD62L- HLA DR++ monocyte %monocyte	rs111224423	4	1531162	G	C	0.0406	-0.2995	0.06702	3041	8.14798e-06	19.9637
CD62L- HLA DR++ monocyte %monocyte	rs11766800	7	50435617	T	A	0.1981	-0.1541	0.03378	3041	5.28896e-06	20.8038
CD62L- HLA DR++ monocyte %monocyte	rs1969797	9	85828008	A	T	0.0064	0.807	0.1756	3041	4.49097e-06	21.1133
CD62L- HLA DR++ monocyte %monocyte	rs78736203	10	18422972	A	G	0.0449	-0.2955	0.06541	3041	6.48694e-06	20.4025
CD62L- HLA DR++ monocyte %monocyte	rs35079623	14	31868358	C	T	0.0344	0.3488	0.07433	3041	2.80899e-06	22.0131
CD62L- HLA DR++ monocyte %monocyte	rs765044	19	2560423	G	T	0.2292	0.1523	0.03151	3041	1.40101e-06	23.3539
CD62L- HLA DR++ monocyte %monocyte	rs5761319	22	26322953	T	A	0.479	0.1333	0.02676	3041	6.65503e-07	24.8053
CD11c+ HLA DR++ monocyte Absolute Count	rs506388	1	229571061	G	T	0.632	0.1258	0.02806	3019	7.66408e-06	20.0929
CD11c+ HLA DR++ monocyte Absolute Count	rs561934182	1	103631826	G	C	0.0035	1.163	0.2505	3019	3.61302e-06	21.5477
CD11c+ HLA DR++ monocyte Absolute Count	rs56186608	1	45056124	T	C	0.3741	-0.1271	0.02801	3019	5.88803e-06	20.5836
CD11c+ HLA DR++ monocyte Absolute Count	rs72660177	1	34019363	T	C	0.1017	-0.198	0.04402	3019	7.13806e-06	20.2249
CD11c+ HLA DR++ monocyte Absolute Count	rs2404849	1	224272792	G	T	0.7464	0.1466	0.03065	3019	1.79602e-06	22.8698
CD11c+ HLA DR++ monocyte Absolute Count	rs116484930	1	76985141	T	C	0.0012	1.839	0.4029	3019	5.22601e-06	20.8269
CD11c+ HLA DR++ monocyte Absolute Count	rs6808893	3	188133439	T	C	0.5711	-0.1285	0.02714	3019	2.31201e-06	22.41
CD11c+ HLA DR++ monocyte Absolute Count	rs548306594	3	87446622	C	T	0.0187	-0.502	0.1059	3019	2.231e-06	22.4632
CD11c+ HLA DR++ monocyte Absolute Count	rs74610143	3	172744541	T	C	0.0124	0.5811	0.1256	3019	3.83902e-06	21.3983
CD11c+ HLA DR++ monocyte Absolute Count	rs55651060	6	67292748	T	G	0.0157	-0.5072	0.1058	3019	1.71498e-06	22.9743
CD11c+ HLA DR++ monocyte Absolute Count	rs2295270	6	47216562	A	G	0.19	0.1631	0.03419	3019	1.91898e-06	22.7492
CD11c+ HLA DR++ monocyte Absolute Count	rs151194174	7	20995778	A	G	0.0305	-0.3754	0.07868	3019	1.91898e-06	22.757
CD11c+ HLA DR++ monocyte Absolute Count	rs2587473	10	72515785	T	C	0.2433	-0.1584	0.03131	3019	4.46601e-07	25.5859
CD11c+ HLA DR++ monocyte Absolute Count	rs12277397	11	134569102	T	G	0.1179	0.1863	0.04033	3019	4e-06	21.3317
CD11c+ HLA DR++ monocyte Absolute Count	rs112353331	13	100594821	T	C	0.0197	-0.4377	0.09729	3019	7.07995e-06	20.2336
CD11c+ HLA DR++ monocyte Absolute Count	rs148420500	13	76034172	A	G	0.0209	-0.4097	0.091	3019	6.96996e-06	20.2631
CD11c+ HLA DR++ monocyte Absolute Count	rs9894233	17	45778747	A	T	0.0268	-0.3853	0.08638	3019	8.46896e-06	19.8897
CD11c+ HLA DR++ monocyte Absolute Count	rs76376209	17	35215045	T	C	0.1423	-0.1651	0.03714	3019	9.12809e-06	19.7545
CD11c+ HLA DR++ monocyte Absolute Count	rs117545845	22	25622885	T	C	0.1211	0.189	0.04018	3019	2.678e-06	22.1187
CD11c+ HLA DR++ monocyte %monocyte	rs77361483	1	56892198	T	C	0.0661	0.2544	0.05533	3042	4.45502e-06	21.1334
CD11c+ HLA DR++ monocyte %monocyte	rs191730825	1	46613239	G	A	0.0293	0.3732	0.08142	3042	4.74799e-06	21.0029
CD11c+ HLA DR++ monocyte %monocyte	rs6808893	3	188133439	T	C	0.5717	-0.1582	0.02739	3042	8.47208e-09	33.3492
CD11c+ HLA DR++ monocyte %monocyte	rs74610143	3	172744541	T	C	0.0125	0.6697	0.1264	3042	1.26101e-07	28.0623
CD11c+ HLA DR++ monocyte %monocyte	rs76838015	4	141946812	A	G	0.0003	3.194	0.7173	3042	8.7579e-06	19.821
CD11c+ HLA DR++ monocyte %monocyte	rs35237330	4	182768743	A	G	0.0971	-0.2309	0.04538	3042	3.82402e-07	25.8807
CD11c+ HLA DR++ monocyte %monocyte	rs6942832	7	24465888	T	A	0.4196	0.1238	0.02716	3042	5.39498e-06	20.7701
CD11c+ HLA DR++ monocyte %monocyte	rs78175301	7	23629053	G	A	0.0251	0.4043	0.0873	3042	3.78504e-06	21.4406
CD11c+ HLA DR++ monocyte %monocyte	rs11785252	8	117400280	A	C	0.7429	-0.1459	0.03084	3042	2.32097e-06	22.3738
CD11c+ HLA DR++ monocyte %monocyte	rs2587473	10	72515785	T	C	0.2431	-0.1412	0.03166	3042	8.46798e-06	19.884
CD11c+ HLA DR++ monocyte %monocyte	rs1469503	11	112076693	T	A	0.9564	0.304	0.06476	3042	2.80498e-06	22.0288
CD11c+ HLA DR++ monocyte %monocyte	rs117853201	11	80035628	A	G	0.0074	0.6992	0.1547	3042	6.47307e-06	20.4211
CD11c+ HLA DR++ monocyte %monocyte	rs7101558	11	115387449	G	A	0.044	-0.3015	0.06462	3042	3.21299e-06	21.762
CD11c+ HLA DR++ monocyte %monocyte	rs76968110	14	31160823	A	G	0.0189	-0.447	0.0967	3042	3.95303e-06	21.3609
CD11c+ HLA DR++ monocyte %monocyte	rs9897015	17	45202758	A	G	0.3922	-0.1267	0.02729	3042	3.58798e-06	21.5478
CD11c+ HLA DR++ monocyte %monocyte	rs76376209	17	35215045	T	C	0.1418	-0.1798	0.03753	3042	1.749e-06	22.9445
CD11c+ HLA DR++ monocyte %monocyte	rs6038180	20	5465449	C	T	0.2936	0.1304	0.02905	3042	7.41293e-06	20.1428
CD11c+ HLA DR++ monocyte %monocyte	rs143643742	20	45975692	G	A	0.0168	-0.4681	0.1043	3042	7.46105e-06	20.1357
Myeloid Dendritic Cell Absolute Count	rs141320646	1	73622958	A	G	0.005	0.8749	0.1843	3387	2.14501e-06	22.5288
Myeloid Dendritic Cell Absolute Count	rs115805162	1	161410253	T	C	0.2083	-0.2265	0.03229	3387	2.75296e-12	49.1895
Myeloid Dendritic Cell Absolute Count	rs71632979	1	161526397	G	A	0.2449	0.6546	0.02797	3387	2.29087e-112	547.569
Myeloid Dendritic Cell Absolute Count	rs147678401	1	161035780	A	G	0.0437	0.319	0.06262	3387	3.69199e-07	25.9434
Myeloid Dendritic Cell Absolute Count	rs569911	1	160798209	C	T	0.4349	0.1529	0.02614	3387	5.432e-09	34.2039
Myeloid Dendritic Cell Absolute Count	rs142472859	2	40026310	C	T	0.0061	0.7935	0.1634	3387	1.25401e-06	23.5755
Myeloid Dendritic Cell Absolute Count	rs17017403	2	112435483	C	T	0.0977	-0.2007	0.04301	3387	3.18002e-06	21.7685
Myeloid Dendritic Cell Absolute Count	rs72794768	2	40472950	A	C	0.012	0.5531	0.1168	3387	2.27002e-06	22.4178
Myeloid Dendritic Cell Absolute Count	rs115389169	3	1981195	T	C	0.0118	-0.5608	0.1242	3387	6.54305e-06	20.3819
Myeloid Dendritic Cell Absolute Count	rs4681269	3	145530567	G	A	0.4244	-0.1157	0.02587	3387	7.97003e-06	19.9961
Myeloid Dendritic Cell Absolute Count	rs17036497	4	106927356	T	C	0.0136	-0.4793	0.1065	3387	6.98393e-06	20.2482
Myeloid Dendritic Cell Absolute Count	rs79275634	5	112543958	A	G	0.0106	0.574	0.1265	3387	5.90704e-06	20.5833
Myeloid Dendritic Cell Absolute Count	rs76168011	7	4372544	G	C	0.0049	-0.8214	0.1815	3387	6.25101e-06	20.4752
Myeloid Dendritic Cell Absolute Count	rs62504404	8	38806068	A	G	0.4846	0.1205	0.0252	3387	1.81301e-06	22.8583
Myeloid Dendritic Cell Absolute Count	rs16938204	8	73348626	T	C	0.2938	0.1297	0.02755	3387	2.60898e-06	22.1569
Myeloid Dendritic Cell Absolute Count	rs138949944	9	21870164	T	C	0.0018	-1.325	0.2906	3387	5.28701e-06	20.7832
Myeloid Dendritic Cell Absolute Count	rs10746769	9	88374754	C	T	0.8078	-0.1438	0.03219	3387	8.21391e-06	19.9502
Myeloid Dendritic Cell Absolute Count	rs10763776	10	30413417	A	T	0.428	-0.1158	0.02585	3387	7.76104e-06	20.0617
Myeloid Dendritic Cell Absolute Count	rs17711429	11	34866130	G	A	0.0214	0.3915	0.08829	3387	9.54707e-06	19.6568
Myeloid Dendritic Cell Absolute Count	rs206131	13	32875763	T	C	0.3106	-0.1238	0.02757	3387	7.34294e-06	20.1576
Myeloid Dendritic Cell Absolute Count	rs1664690	19	4079922	T	A	0.9117	0.1978	0.04469	3387	9.85099e-06	19.5841
Myeloid Dendritic Cell Absolute Count	rs147711004	19	45337918	A	G	0.0009	-1.922	0.4296	3387	7.94493e-06	20.0101
Myeloid Dendritic Cell Absolute Count	rs6048352	20	22780354	G	A	0.6811	-0.1264	0.02708	3387	3.16701e-06	21.7805
Myeloid Dendritic Cell Absolute Count	rs147431504	20	2470273	G	C	0.0038	0.9423	0.2032	3387	3.642e-06	21.4982
Myeloid Dendritic Cell %Dendritic Cell	rs143140559	1	160972255	T	C	0.0094	0.6438	0.1286	3410	5.78496e-07	25.0549
Myeloid Dendritic Cell %Dendritic Cell	rs71639910	1	161937774	A	G	0.0688	0.2526	0.05138	3410	9.21998e-07	24.163
Myeloid Dendritic Cell %Dendritic Cell	rs71632979	1	161526397	G	A	0.2447	0.6258	0.0287	3410	8.46058e-99	475.313
Myeloid Dendritic Cell %Dendritic Cell	rs74341264	1	161561151	A	G	0.1218	-0.2585	0.0396	3410	7.62255e-11	42.5994
Myeloid Dendritic Cell %Dendritic Cell	rs66730637	2	65193712	T	C	0.0839	-0.2154	0.04634	3410	3.478e-06	21.5999
Myeloid Dendritic Cell %Dendritic Cell	rs142472859	2	40026310	C	T	0.006	0.7369	0.1648	3410	8.07402e-06	19.9883
Myeloid Dendritic Cell %Dendritic Cell	rs7577824	2	111876763	A	G	0.4757	-0.1227	0.02584	3410	2.14699e-06	22.5412
Myeloid Dendritic Cell %Dendritic Cell	rs141267173	2	211051993	T	C	0.0531	-0.2542	0.05602	3410	5.89902e-06	20.5844
Myeloid Dendritic Cell %Dendritic Cell	rs11715127	3	384169	C	G	0.1276	-0.1682	0.03678	3410	4.99505e-06	20.9075
Myeloid Dendritic Cell %Dendritic Cell	rs62272723	3	151963160	T	G	0.0501	0.2972	0.05987	3410	7.26708e-07	24.6349
Myeloid Dendritic Cell %Dendritic Cell	rs114586806	6	36323614	T	C	0.0292	0.3577	0.07639	3410	2.93299e-06	21.9198
Myeloid Dendritic Cell %Dendritic Cell	rs196051	6	22056131	G	A	0.3971	0.1185	0.02668	3410	9.16495e-06	19.7214
Myeloid Dendritic Cell %Dendritic Cell	rs78726632	7	14195723	C	G	0.0097	-0.6159	0.1305	3410	2.44399e-06	22.2675
Myeloid Dendritic Cell %Dendritic Cell	rs876036	7	50307710	C	T	0.2645	0.1584	0.02961	3410	9.42193e-08	28.6092
Myeloid Dendritic Cell %Dendritic Cell	rs4921823	8	17810983	T	C	0.0362	-0.3324	0.07035	3410	2.39398e-06	22.3186
Myeloid Dendritic Cell %Dendritic Cell	rs34547718	8	130647985	G	T	0.2875	-0.1378	0.02808	3410	9.67297e-07	24.0756
Myeloid Dendritic Cell %Dendritic Cell	rs17767335	8	71747316	C	T	0.0023	1.198	0.2622	3410	5.08698e-06	20.8699
Myeloid Dendritic Cell %Dendritic Cell	rs1571857	9	135295345	T	C	0.0855	-0.2037	0.04568	3410	8.53002e-06	19.8794
Myeloid Dendritic Cell %Dendritic Cell	rs145330472	9	31374800	A	G	0.0265	-0.3648	0.07932	3410	4.39805e-06	21.1454
Myeloid Dendritic Cell %Dendritic Cell	rs1330145	9	110467582	G	T	0.5802	0.1193	0.02592	3410	4.35101e-06	21.1779
Myeloid Dendritic Cell %Dendritic Cell	rs4752481	10	122700529	T	G	0.4535	0.1266	0.02587	3410	1.034e-06	23.9413
Myeloid Dendritic Cell %Dendritic Cell	rs10735429	12	108726677	G	A	0.7411	-0.1364	0.02991	3410	5.313e-06	20.7907
Myeloid Dendritic Cell %Dendritic Cell	rs73180904	13	44765322	T	C	0.0842	0.2116	0.04675	3410	6.223e-06	20.4805
Myeloid Dendritic Cell %Dendritic Cell	rs79691782	16	111247	T	C	0.0783	-0.223	0.04904	3410	5.62898e-06	20.6719
Myeloid Dendritic Cell %Dendritic Cell	rs79631949	17	12078483	T	C	0.0136	0.5111	0.1141	3410	7.71099e-06	20.0592
Myeloid Dendritic Cell %Dendritic Cell	rs73064521	19	58148090	T	A	0.0466	-0.2695	0.05971	3410	6.58097e-06	20.3655
Myeloid Dendritic Cell %Dendritic Cell	rs6079813	20	15407093	A	G	0.0136	-0.5066	0.1102	3410	4.43803e-06	21.1271
Myeloid Dendritic Cell %Dendritic Cell	rs12628370	22	27665142	T	C	0.1474	-0.1675	0.03597	3410	3.34996e-06	21.6781
Plasmacytoid Dendritic Cell Absolute Count	rs6751072	2	1970675	T	C	0.0957	-0.1841	0.04126	3374	8.41492e-06	19.9031
Plasmacytoid Dendritic Cell Absolute Count	rs6708784	2	111927379	G	A	0.4784	0.1169	0.02406	3374	1.243e-06	23.5998
Plasmacytoid Dendritic Cell Absolute Count	rs12616455	2	85696551	A	G	0.7121	0.1321	0.02633	3374	5.57301e-07	25.1637
Plasmacytoid Dendritic Cell Absolute Count	rs7560153	2	221584311	G	T	0.0071	-0.6432	0.1424	3374	6.51193e-06	20.3959
Plasmacytoid Dendritic Cell Absolute Count	rs115638174	2	178694935	T	C	0.0052	-0.7983	0.166	3374	1.59302e-06	23.12
Plasmacytoid Dendritic Cell Absolute Count	rs2164210	2	136580287	C	T	0.3244	0.1937	0.02628	3374	2.11787e-13	54.31
Plasmacytoid Dendritic Cell Absolute Count	rs192992420	3	19131454	T	C	0.0012	-1.742	0.3865	3374	6.77907e-06	20.3081
Plasmacytoid Dendritic Cell Absolute Count	rs77908862	3	104696995	C	T	0.071	0.2251	0.04706	3374	1.79399e-06	22.8727
Plasmacytoid Dendritic Cell Absolute Count	rs2545798	5	176855627	A	T	0.4813	0.1163	0.02379	3374	1.05201e-06	23.8914
Plasmacytoid Dendritic Cell Absolute Count	rs62354582	5	36514924	T	C	0.0133	0.5481	0.1034	3374	1.245e-07	28.0899
Plasmacytoid Dendritic Cell Absolute Count	rs144152085	6	67895544	G	C	0.0009	-1.824	0.3956	3374	4.16601e-06	21.2524
Plasmacytoid Dendritic Cell Absolute Count	rs73064418	7	21574985	C	T	0.0702	-0.2167	0.04768	3374	5.68696e-06	20.6498
Plasmacytoid Dendritic Cell Absolute Count	rs186765793	7	11535712	T	C	0.0325	-0.3111	0.06766	3374	4.41804e-06	21.1352
Plasmacytoid Dendritic Cell Absolute Count	rs876039	7	50308811	C	G	0.2619	-0.1971	0.02752	3374	9.51481e-13	51.28
Plasmacytoid Dendritic Cell Absolute Count	rs117039412	8	34472241	A	T	0.0007	2.012	0.4152	3374	1.31701e-06	23.4754
Plasmacytoid Dendritic Cell Absolute Count	rs11776881	8	131805603	C	A	0.4092	0.1139	0.02439	3374	3.14101e-06	21.8019
Plasmacytoid Dendritic Cell Absolute Count	rs2862050	10	99691593	T	C	0.818	-0.1453	0.03097	3374	2.81598e-06	22.0049
Plasmacytoid Dendritic Cell Absolute Count	rs17108993	10	95364033	G	C	0.0141	-0.4462	0.1003	3374	8.93203e-06	19.7847
Plasmacytoid Dendritic Cell Absolute Count	rs55901425	11	80180769	C	T	0.0028	1.044	0.2255	3374	3.81101e-06	21.4279
Plasmacytoid Dendritic Cell Absolute Count	rs117839924	12	101344076	C	T	0.0015	1.338	0.2948	3374	5.868e-06	20.5934
Plasmacytoid Dendritic Cell Absolute Count	rs117112573	12	53745426	C	G	0.0202	0.3807	0.0838	3374	5.73694e-06	20.6324
Plasmacytoid Dendritic Cell Absolute Count	rs17582557	13	101828654	C	T	0.0169	0.4301	0.09125	3374	2.54302e-06	22.2098
Plasmacytoid Dendritic Cell Absolute Count	rs76924856	14	100464091	G	T	0.0637	-0.2103	0.04684	3374	7.32099e-06	20.1519
Plasmacytoid Dendritic Cell Absolute Count	rs217667	14	62358847	T	C	0.1457	0.1614	0.03341	3374	1.424e-06	23.3306
Plasmacytoid Dendritic Cell Absolute Count	rs138423727	15	43005653	C	T	0.0313	0.3131	0.06882	3374	5.55405e-06	20.6923
Plasmacytoid Dendritic Cell Absolute Count	rs142129101	16	3995624	C	A	0.0056	-0.7037	0.155	3374	5.85302e-06	20.6055
Plasmacytoid Dendritic Cell Absolute Count	rs147983983	16	83921634	G	T	0.0319	0.3127	0.06932	3374	6.69499e-06	20.3428
Plasmacytoid Dendritic Cell Absolute Count	rs16977238	17	70427321	A	G	0.1432	0.152	0.034	3374	8.07105e-06	19.9802
Plasmacytoid Dendritic Cell Absolute Count	rs16944211	17	10991039	T	C	0.0027	-1.205	0.2342	3374	2.80899e-07	26.465
Plasmacytoid Dendritic Cell Absolute Count	rs117990934	17	35059123	C	G	0.0019	-1.178	0.2619	3374	7.06708e-06	20.2251
Plasmacytoid Dendritic Cell Absolute Count	rs10853636	18	51412543	G	A	0.4413	0.1138	0.02422	3374	2.72703e-06	22.0703
Dendritic Cell Absolute Count	rs191217950	1	160940671	A	G	0.0096	0.6722	0.127	3374	1.276e-07	28.0066
Dendritic Cell Absolute Count	rs911228	1	160145298	A	G	0.5697	0.1199	0.02567	3374	3.08901e-06	21.8101
Dendritic Cell Absolute Count	rs55971447	1	161515326	T	C	0.2358	0.5889	0.02846	3374	1.19812e-89	428.04
Dendritic Cell Absolute Count	rs75072970	1	161058351	C	T	0.0532	0.3483	0.05681	3374	9.7389e-10	37.5776
Dendritic Cell Absolute Count	rs12144062	1	120123990	T	C	0.1464	0.1591	0.03557	3374	8.00295e-06	20.0006
Dendritic Cell Absolute Count	rs17438107	1	162920561	T	A	0.0917	0.1983	0.04369	3374	5.87706e-06	20.5946
Dendritic Cell Absolute Count	rs2322660	2	136557319	T	C	0.3254	0.1262	0.02779	3374	5.77205e-06	20.6164
Dendritic Cell Absolute Count	rs17017403	2	112435483	C	T	0.098	-0.195	0.04252	3374	4.68296e-06	21.0259
Dendritic Cell Absolute Count	rs7355664	2	47496463	C	G	0.4502	0.1158	0.0251	3374	4.08498e-06	21.2785
Dendritic Cell Absolute Count	rs6782857	3	31185662	A	G	0.1101	0.1846	0.04063	3374	5.74103e-06	20.6367
Dendritic Cell Absolute Count	rs115751481	3	41531792	A	T	0.0258	-0.3782	0.08174	3374	3.843e-06	21.4015
Dendritic Cell Absolute Count	rs11748731	5	30878060	T	C	0.0362	0.3124	0.06744	3374	3.75396e-06	21.4515
Dendritic Cell Absolute Count	rs79275634	5	112543958	A	G	0.0107	0.5945	0.1248	3374	1.98299e-06	22.6854
Dendritic Cell Absolute Count	rs2490034	6	3870889	A	G	0.7432	0.1328	0.02893	3374	4.60596e-06	21.0654
Dendritic Cell Absolute Count	rs76168011	7	4372544	G	C	0.0049	-0.7956	0.1796	3374	9.74002e-06	19.6177
Dendritic Cell Absolute Count	rs35802809	7	46017435	T	G	0.0313	-0.3287	0.07248	3374	5.94895e-06	20.5605
Dendritic Cell Absolute Count	rs28854187	8	73320315	A	G	0.2964	0.1282	0.02716	3374	2.452e-06	22.2735
Dendritic Cell Absolute Count	rs62504404	8	38806068	A	G	0.4843	0.125	0.02491	3374	5.47797e-07	25.1735
Dendritic Cell Absolute Count	rs138192280	9	88411604	T	C	0.1679	0.1545	0.0336	3374	4.39805e-06	21.1373
Dendritic Cell Absolute Count	rs142917473	12	133840072	C	G	0.3072	-0.1534	0.03214	3374	1.894e-06	22.7735
Dendritic Cell Absolute Count	rs9590896	13	32877696	A	G	0.3103	-0.1209	0.02728	3374	9.57789e-06	19.6352
Dendritic Cell Absolute Count	rs115102594	17	35251042	G	C	0.0603	-0.252	0.05419	3374	3.434e-06	21.6189
Dendritic Cell Absolute Count	rs147431504	20	2470273	G	C	0.0039	0.9392	0.2001	3374	2.78298e-06	22.0238
CD62L- Dendritic Cell Absolute Count	rs74341264	1	161561151	A	G	0.1219	-0.3652	0.03894	3387	1.18195e-20	87.9309
CD62L- Dendritic Cell Absolute Count	rs143140559	1	160972255	T	C	0.0094	0.7418	0.1284	3387	8.28209e-09	33.3669
CD62L- Dendritic Cell Absolute Count	rs71632979	1	161526397	G	A	0.2449	0.7524	0.02735	3387	1.40281e-150	756.58
CD62L- Dendritic Cell Absolute Count	rs147678401	1	161035780	A	G	0.0437	0.3283	0.06281	3387	1.82898e-07	27.3122
CD62L- Dendritic Cell Absolute Count	rs71639910	1	161937774	A	G	0.0686	0.3586	0.05081	3387	2.04692e-12	49.7959
CD62L- Dendritic Cell Absolute Count	rs17438107	1	162920561	T	A	0.0921	0.2057	0.04421	3387	3.37699e-06	21.6421
CD62L- Dendritic Cell Absolute Count	rs75055130	2	155187137	C	G	0.0024	-1.139	0.2448	3387	3.39203e-06	21.6419
CD62L- Dendritic Cell Absolute Count	rs9855547	3	163257483	G	T	0.8091	0.1447	0.03248	3387	8.67801e-06	19.8416
CD62L- Dendritic Cell Absolute Count	rs35740507	4	90807488	C	T	0.0001	-4.152	0.8762	3387	2.23599e-06	22.4481
CD62L- Dendritic Cell Absolute Count	rs139894456	8	141396189	A	C	0.0025	-1.176	0.2575	3387	5.12201e-06	20.8512
CD62L- Dendritic Cell Absolute Count	rs771894	9	1642516	A	G	0.0602	0.2383	0.05385	3387	9.91402e-06	19.5771
CD62L- Dendritic Cell Absolute Count	rs116910026	11	19877912	T	C	0.0512	0.2767	0.05667	3387	1.09401e-06	23.8333
CD62L- Dendritic Cell Absolute Count	rs149812305	11	5480718	C	T	0.0272	-0.36	0.0755	3387	1.94299e-06	22.7291
CD62L- Dendritic Cell Absolute Count	rs73231298	12	127036033	A	G	0.287	0.1337	0.02799	3387	1.86599e-06	22.8102
CD62L- Dendritic Cell Absolute Count	rs35519924	15	81119490	A	G	0.3276	0.128	0.02738	3387	3.039e-06	21.8487
CD62L- Dendritic Cell Absolute Count	rs151030554	15	57324322	A	C	0.0009	-2.086	0.4634	3387	6.98104e-06	20.2576
CD62L- Dendritic Cell Absolute Count	rs139058442	16	74973365	A	G	0.0353	0.3107	0.07021	3387	9.94489e-06	19.5775
CD62L- Dendritic Cell Absolute Count	rs112701148	18	10175131	T	G	0.0697	-0.2246	0.05013	3387	7.69502e-06	20.0676
CD62L- Dendritic Cell Absolute Count	rs6048352	20	22780354	G	A	0.6811	-0.1219	0.02717	3387	7.54797e-06	20.1233
CD62L- Dendritic Cell %Dendritic Cell	rs1515318	1	105108278	A	G	0.435	-0.1257	0.02658	3410	2.34401e-06	22.358
CD62L- Dendritic Cell %Dendritic Cell	rs143140559	1	160972255	T	C	0.0094	0.6557	0.1304	3410	5.14802e-07	25.2771
CD62L- Dendritic Cell %Dendritic Cell	rs74341264	1	161561151	A	G	0.1218	-0.3829	0.03987	3410	1.43285e-21	92.2042
CD62L- Dendritic Cell %Dendritic Cell	rs143032729	1	160353789	G	A	0.0326	0.4142	0.07525	3410	3.971e-08	30.2886
CD62L- Dendritic Cell %Dendritic Cell	rs6537835	1	115108914	A	G	0.8488	-0.2072	0.03711	3410	2.54302e-08	31.1652
CD62L- Dendritic Cell %Dendritic Cell	rs79979402	1	62527805	G	A	0.0679	0.2373	0.05218	3410	5.63599e-06	20.6757
CD62L- Dendritic Cell %Dendritic Cell	rs341029	1	77072414	A	G	0.7375	-0.137	0.02939	3410	3.25499e-06	21.7227
CD62L- Dendritic Cell %Dendritic Cell	rs56199187	1	161520931	T	C	0.2441	0.7548	0.02809	3410	2.11349e-144	721.827
CD62L- Dendritic Cell %Dendritic Cell	rs4680245	3	155938532	A	G	0.0334	-0.3312	0.07348	3410	6.80503e-06	20.3102
CD62L- Dendritic Cell %Dendritic Cell	rs112985320	3	67260176	T	C	0.0059	-0.855	0.1882	3410	5.72598e-06	20.6332
CD62L- Dendritic Cell %Dendritic Cell	rs62300075	4	43118540	C	A	0.3707	0.1381	0.027	3410	3.32499e-07	26.1537
CD62L- Dendritic Cell %Dendritic Cell	rs116473196	5	179543345	T	C	0.0031	-0.9935	0.2113	3410	2.68398e-06	22.1009
CD62L- Dendritic Cell %Dendritic Cell	rs75220521	6	81660130	G	T	0.0023	1.355	0.2917	3410	3.498e-06	21.5714
CD62L- Dendritic Cell %Dendritic Cell	rs28895017	6	31817114	A	C	NA	-4.181	0.9319	3410	7.47705e-06	20.1231
CD62L- Dendritic Cell %Dendritic Cell	rs11754319	6	8259337	T	G	0.0012	-1.697	0.3784	3410	7.59696e-06	20.1064
CD62L- Dendritic Cell %Dendritic Cell	rs78548019	6	148373443	T	C	0.0031	-1.039	0.231	3410	7.05602e-06	20.2246
CD62L- Dendritic Cell %Dendritic Cell	rs702185	9	1621830	G	A	0.0783	0.2232	0.04854	3410	4.41205e-06	21.1379
CD62L- Dendritic Cell %Dendritic Cell	rs138315340	11	19889219	T	A	0.0516	0.2575	0.05769	3410	8.35391e-06	19.9171
CD62L- Dendritic Cell %Dendritic Cell	rs41275192	11	6479487	C	T	0.021	0.4062	0.09061	3410	7.61395e-06	20.0909
CD62L- Dendritic Cell %Dendritic Cell	rs149812305	11	5480718	C	T	0.0271	-0.3592	0.07663	3410	2.87799e-06	21.9658
CD62L- Dendritic Cell %Dendritic Cell	rs2332920	14	73286458	G	A	0.3752	0.1217	0.02693	3410	6.40103e-06	20.4165
CD62L- Dendritic Cell %Dendritic Cell	rs7163051	15	68361528	A	G	0.3702	0.1266	0.02752	3410	4.34901e-06	21.1565
CD62L- Dendritic Cell %Dendritic Cell	rs148188224	16	65149970	G	C	0.0019	-1.426	0.3084	3410	3.94703e-06	21.3739
CD62L- Dendritic Cell %Dendritic Cell	rs2024391	16	11907102	T	C	0.1736	0.1625	0.0348	3410	3.13098e-06	21.7982
CD62L- Dendritic Cell %Dendritic Cell	rs5767014	22	48474288	C	T	0.7776	-0.1368	0.03073	3410	8.76799e-06	19.8116
CD86+ myeloid Dendritic Cell Absolute Count	rs72711599	1	162752670	A	G	0.0884	0.2153	0.04595	3387	2.91602e-06	21.9477
CD86+ myeloid Dendritic Cell Absolute Count	rs12134798	1	120115384	T	C	0.1673	0.1639	0.03471	3387	2.44602e-06	22.2905
CD86+ myeloid Dendritic Cell Absolute Count	rs147678401	1	161035780	A	G	0.0437	0.3116	0.06427	3387	1.30101e-06	23.499
CD86+ myeloid Dendritic Cell Absolute Count	rs139939515	1	163958750	T	C	0.0124	-0.5561	0.1174	3387	2.28202e-06	22.4306
CD86+ myeloid Dendritic Cell Absolute Count	rs71639910	1	161937774	A	G	0.0686	0.3667	0.05205	3387	2.25476e-12	49.6195
CD86+ myeloid Dendritic Cell Absolute Count	rs6656063	1	157964856	T	C	0.2499	0.1405	0.02956	3387	2.093e-06	22.5848
CD86+ myeloid Dendritic Cell Absolute Count	rs71632979	1	161526397	G	A	0.2449	0.8088	0.02785	3387	9.7051e-166	843.148
CD86+ myeloid Dendritic Cell Absolute Count	rs113995133	1	163485197	A	G	0.0103	-0.6058	0.1285	3387	2.51102e-06	22.219
CD86+ myeloid Dendritic Cell Absolute Count	rs3789359	1	181020181	C	T	0.023	-0.3862	0.08529	3387	6.158e-06	20.4975
CD86+ myeloid Dendritic Cell Absolute Count	rs74341264	1	161561151	A	G	0.1219	-0.355	0.04006	3387	1.25401e-18	78.5067
CD86+ myeloid Dendritic Cell Absolute Count	rs143140559	1	160972255	T	C	0.0094	0.7391	0.1304	3387	1.55299e-08	32.1161
CD86+ myeloid Dendritic Cell Absolute Count	rs115849513	3	1827937	T	A	0.0245	-0.3927	0.08325	3387	2.495e-06	22.2446
CD86+ myeloid Dendritic Cell Absolute Count	rs112966518	4	76221611	G	T	0.2149	-0.1444	0.03211	3387	7.18406e-06	20.2174
CD86+ myeloid Dendritic Cell Absolute Count	rs112186537	6	73397623	T	C	0.0075	-0.6969	0.1444	3387	1.45499e-06	23.2851
CD86+ myeloid Dendritic Cell Absolute Count	rs923967	8	116153312	A	T	0.4074	-0.1177	0.0264	3387	8.52806e-06	19.8709
CD86+ myeloid Dendritic Cell Absolute Count	rs16938204	8	73348626	T	C	0.2938	0.1278	0.02818	3387	5.94005e-06	20.5613
CD86+ myeloid Dendritic Cell Absolute Count	rs12005879	9	133737649	A	G	0.0576	-0.2492	0.05518	3387	6.52995e-06	20.3894
CD86+ myeloid Dendritic Cell Absolute Count	rs9557311	13	100459317	A	G	0.1333	0.1673	0.03771	3387	9.41499e-06	19.6766
CD86+ myeloid Dendritic Cell Absolute Count	rs75700156	14	44042820	C	T	0.0021	-1.333	0.2966	3387	7.23902e-06	20.1925
CD86+ myeloid Dendritic Cell Absolute Count	rs185312213	14	51937110	G	T	0.0066	-0.7215	0.1571	3387	4.52501e-06	21.0859
CD86+ myeloid Dendritic Cell Absolute Count	rs140205436	15	25969797	T	C	0.0006	-2.409	0.5106	3387	2.476e-06	22.2528
CD86+ myeloid Dendritic Cell Absolute Count	rs79497887	16	57725145	G	C	0.0865	-0.2163	0.04565	3387	2.25798e-06	22.4442
CD86+ myeloid Dendritic Cell Absolute Count	rs72846852	17	77253136	T	C	0.0282	-0.3544	0.07783	3387	5.46903e-06	20.7284
CD86+ myeloid Dendritic Cell %Dendritic Cell	rs143140559	1	160972255	T	C	0.0094	0.6732	0.1308	3410	2.80098e-07	26.4817
CD86+ myeloid Dendritic Cell %Dendritic Cell	rs6656063	1	157964856	T	C	0.2501	0.1357	0.02958	3410	4.635e-06	21.0395
CD86+ myeloid Dendritic Cell %Dendritic Cell	rs71639910	1	161937774	A	G	0.0688	0.3612	0.0521	3410	4.9023e-12	48.0499
CD86+ myeloid Dendritic Cell %Dendritic Cell	rs3789359	1	181020181	C	T	0.0229	-0.3803	0.0855	3410	8.93799e-06	19.7785
CD86+ myeloid Dendritic Cell %Dendritic Cell	rs113995133	1	163485197	A	G	0.0103	-0.6667	0.1287	3410	2.339e-07	26.8273
CD86+ myeloid Dendritic Cell %Dendritic Cell	rs74341264	1	161561151	A	G	0.1218	-0.3508	0.0401	3410	3.33887e-18	76.5073
CD86+ myeloid Dendritic Cell %Dendritic Cell	rs139939515	1	163958750	T	C	0.0123	-0.6222	0.1176	3410	1.30299e-07	27.9845
CD86+ myeloid Dendritic Cell %Dendritic Cell	rs71632979	1	161526397	G	A	0.2447	0.8089	0.02792	3410	4.21697e-165	839.134
CD86+ myeloid Dendritic Cell %Dendritic Cell	rs950485	1	82817239	C	A	0.4919	0.1227	0.02577	3410	2.01002e-06	22.6638
CD86+ myeloid Dendritic Cell %Dendritic Cell	rs114566711	2	191451636	T	A	0.0009	-1.864	0.391	3410	1.948e-06	22.7201
CD86+ myeloid Dendritic Cell %Dendritic Cell	rs1996740	4	78748977	G	A	0.4776	-0.1204	0.02608	3410	4.06602e-06	21.3064
CD86+ myeloid Dendritic Cell %Dendritic Cell	rs143512471	5	63081773	A	G	0.026	-0.3741	0.08154	3410	4.62999e-06	21.0429
CD86+ myeloid Dendritic Cell %Dendritic Cell	rs113404917	6	147461264	T	C	0.0633	0.2353	0.05309	3410	9.64295e-06	19.6377
CD86+ myeloid Dendritic Cell %Dendritic Cell	rs78169719	7	157588588	C	A	0.0177	-0.443	0.09659	3410	4.67703e-06	21.0289
CD86+ myeloid Dendritic Cell %Dendritic Cell	rs144259606	7	109678733	C	A	0.001	1.672	0.3718	3410	7.10101e-06	20.2174
CD86+ myeloid Dendritic Cell %Dendritic Cell	rs77148097	7	98162546	G	A	0.0767	-0.225	0.04933	3410	5.26296e-06	20.7977
CD86+ myeloid Dendritic Cell %Dendritic Cell	rs76522264	8	113032809	C	G	0.0004	-2.6	0.5564	3410	3.079e-06	21.8296
CD86+ myeloid Dendritic Cell %Dendritic Cell	rs117690664	8	107693714	A	C	0.0007	-2.515	0.5157	3410	1.123e-06	23.7768
CD86+ myeloid Dendritic Cell %Dendritic Cell	rs143555771	10	89944259	T	C	0.0015	-1.586	0.3474	3410	5.19302e-06	20.8362
CD86+ myeloid Dendritic Cell %Dendritic Cell	rs75358870	14	30170464	A	C	0.0128	0.5691	0.1186	3410	1.66901e-06	23.0187
CD86+ myeloid Dendritic Cell %Dendritic Cell	rs140205436	15	25969797	T	C	0.0006	-2.273	0.5121	3410	9.34394e-06	19.6953
CD86+ myeloid Dendritic Cell %Dendritic Cell	rs72745440	15	67606602	A	C	0.0141	-0.5139	0.11	3410	3.12702e-06	21.8195
CD86+ myeloid Dendritic Cell %Dendritic Cell	rs113345111	18	22455983	G	A	0.0428	0.2938	0.06497	3410	6.30507e-06	20.4433
CD86+ myeloid Dendritic Cell %Dendritic Cell	rs77768825	19	30509788	G	A	0.0755	0.2261	0.04991	3410	6.09902e-06	20.5163
CD86+ plasmacytoid Dendritic Cell Absolute Count	rs56164117	1	45173351	C	T	0.3543	-0.1223	0.02608	3374	2.86603e-06	21.9841
CD86+ plasmacytoid Dendritic Cell Absolute Count	rs1991164	2	1732855	C	T	0.5529	-0.117	0.02506	3374	3.13798e-06	21.7912
CD86+ plasmacytoid Dendritic Cell Absolute Count	rs13088702	3	121714019	C	T	0.0252	0.3946	0.07957	3374	7.45401e-07	24.5859
CD86+ plasmacytoid Dendritic Cell Absolute Count	rs78379738	5	148318809	G	T	0.0368	0.3098	0.06801	3374	5.41801e-06	20.7438
CD86+ plasmacytoid Dendritic Cell Absolute Count	rs10248630	7	67115438	G	T	0.5221	-0.1133	0.02489	3374	5.53095e-06	20.7148
CD86+ plasmacytoid Dendritic Cell Absolute Count	rs2725015	8	4465101	G	A	0.266	-0.1473	0.02834	3374	2.16601e-07	27.007
CD86+ plasmacytoid Dendritic Cell Absolute Count	rs79116372	8	36308379	T	A	0.0375	-0.3011	0.06551	3374	4.44396e-06	21.1192
CD86+ plasmacytoid Dendritic Cell Absolute Count	rs140090913	8	18584959	A	G	0.0028	-1.091	0.2411	3374	6.19498e-06	20.4704
CD86+ plasmacytoid Dendritic Cell Absolute Count	rs139557155	9	77583476	G	A	0.0578	0.2575	0.05462	3374	2.52203e-06	22.2189
CD86+ plasmacytoid Dendritic Cell Absolute Count	rs61852527	10	90380589	G	A	0.0649	-0.2618	0.0509	3374	2.84197e-07	26.4469
CD86+ plasmacytoid Dendritic Cell Absolute Count	rs9513487	13	99428046	G	T	0.3251	0.1234	0.0269	3374	4.67498e-06	21.0376
CD86+ plasmacytoid Dendritic Cell Absolute Count	rs142245023	14	69634234	A	G	0.0067	0.7025	0.1505	3374	3.17198e-06	21.7817
CD86+ plasmacytoid Dendritic Cell Absolute Count	rs11852100	14	36478046	C	A	0.0587	0.2639	0.0548	3374	1.527e-06	23.184
CD86+ plasmacytoid Dendritic Cell Absolute Count	rs75070627	15	96560797	C	T	0.0037	0.9624	0.1978	3374	1.18801e-06	23.6663
CD86+ plasmacytoid Dendritic Cell Absolute Count	rs114468547	16	78055434	G	A	0.0491	-0.2713	0.05921	3374	4.77101e-06	20.9885
CD86+ plasmacytoid Dendritic Cell Absolute Count	rs118148569	16	13019834	T	C	0.0505	0.2729	0.05772	3374	2.362e-06	22.3473
CD86+ plasmacytoid Dendritic Cell Absolute Count	rs112496823	17	33829583	C	A	0.1768	0.1603	0.03305	3374	1.286e-06	23.5177
CD86+ plasmacytoid Dendritic Cell Absolute Count	rs150206669	18	66297295	G	C	0.0123	-0.4937	0.1106	3374	8.30692e-06	19.9199
CD86+ plasmacytoid Dendritic Cell Absolute Count	rs313778	19	3313321	T	C	0.0702	-0.2171	0.04867	3374	8.44695e-06	19.8915
CD86+ plasmacytoid Dendritic Cell Absolute Count	rs11701450	21	34628034	G	C	0.0252	0.3632	0.08004	3374	5.90201e-06	20.5849
CD86+ plasmacytoid Dendritic Cell %Dendritic Cell	rs3845548	1	161507448	T	C	0.2345	-0.2739	0.02938	3410	1.98381e-20	86.8867
CD86+ plasmacytoid Dendritic Cell %Dendritic Cell	rs513617	1	34413398	T	C	0.3594	0.1173	0.0264	3410	9.1939e-06	19.7361
CD86+ plasmacytoid Dendritic Cell %Dendritic Cell	rs11811863	1	247577856	T	C	0.2186	-0.1537	0.03086	3410	6.62598e-07	24.7987
CD86+ plasmacytoid Dendritic Cell %Dendritic Cell	rs11166208	1	99738054	A	G	0.0021	-1.201	0.2713	3410	9.93802e-06	19.5911
CD86+ plasmacytoid Dendritic Cell %Dendritic Cell	rs10170363	2	15272805	T	C	0.2944	0.1318	0.02687	3410	9.80189e-07	24.0529
CD86+ plasmacytoid Dendritic Cell %Dendritic Cell	rs66967216	2	190942111	A	G	0.0265	-0.3759	0.07853	3410	1.76799e-06	22.9058
CD86+ plasmacytoid Dendritic Cell %Dendritic Cell	rs1915087	3	121838791	C	T	0.2025	0.1569	0.03084	3410	3.84601e-07	25.8756
CD86+ plasmacytoid Dendritic Cell %Dendritic Cell	rs78379738	5	148318809	G	T	0.0364	0.3227	0.06823	3410	2.34202e-06	22.3625
CD86+ plasmacytoid Dendritic Cell %Dendritic Cell	rs6930632	6	155772981	T	C	0.1789	-0.1504	0.03249	3410	3.80803e-06	21.4224
CD86+ plasmacytoid Dendritic Cell %Dendritic Cell	rs6463191	7	43492179	A	G	0.3198	-0.1275	0.02658	3410	1.68702e-06	23.0029
CD86+ plasmacytoid Dendritic Cell %Dendritic Cell	rs116872766	8	77883134	C	G	0.0045	-0.9025	0.1818	3410	7.20195e-07	24.6365
CD86+ plasmacytoid Dendritic Cell %Dendritic Cell	rs55966096	8	4474949	C	T	0.3085	-0.1321	0.02729	3410	1.36101e-06	23.4245
CD86+ plasmacytoid Dendritic Cell %Dendritic Cell	rs140090913	8	18584959	A	G	0.0028	-1.154	0.2432	3410	2.174e-06	22.509
CD86+ plasmacytoid Dendritic Cell %Dendritic Cell	rs55732541	9	8370207	C	T	0.1062	-0.186	0.04137	3410	7.12e-06	20.2082
CD86+ plasmacytoid Dendritic Cell %Dendritic Cell	rs139557155	9	77583476	G	A	0.0578	0.277	0.05451	3410	3.92799e-07	25.8155
CD86+ plasmacytoid Dendritic Cell %Dendritic Cell	rs117919713	9	77145787	G	C	0.0588	0.2457	0.05442	3410	6.553e-06	20.3782
CD86+ plasmacytoid Dendritic Cell %Dendritic Cell	rs72810797	10	30336672	T	C	0.0172	-0.4408	0.09664	3410	5.27898e-06	20.799
CD86+ plasmacytoid Dendritic Cell %Dendritic Cell	rs61852527	10	90380589	G	A	0.0648	-0.2768	0.05083	3410	5.53694e-08	29.6459
CD86+ plasmacytoid Dendritic Cell %Dendritic Cell	rs11231693	11	63862612	A	G	0.0554	-0.2631	0.05451	3410	1.44601e-06	23.2896
CD86+ plasmacytoid Dendritic Cell %Dendritic Cell	rs12311260	12	18094072	G	C	0.0501	0.2649	0.0576	3410	4.38399e-06	21.1442
CD86+ plasmacytoid Dendritic Cell %Dendritic Cell	rs9513487	13	99428046	G	T	0.326	0.131	0.0268	3410	1.065e-06	23.8861
CD86+ plasmacytoid Dendritic Cell %Dendritic Cell	rs34692286	13	28137152	C	G	0.3865	-0.114	0.02574	3410	9.75102e-06	19.6094
CD86+ plasmacytoid Dendritic Cell %Dendritic Cell	rs11852100	14	36478046	C	A	0.0587	0.2436	0.05467	3410	8.60696e-06	19.8486
CD86+ plasmacytoid Dendritic Cell %Dendritic Cell	rs75070627	15	96560797	C	T	0.0037	0.9606	0.2005	3410	1.73201e-06	22.9472
CD86+ plasmacytoid Dendritic Cell %Dendritic Cell	rs2955695	15	35034619	A	T	0.4499	-0.1122	0.0247	3410	5.78203e-06	20.6283
CD86+ plasmacytoid Dendritic Cell %Dendritic Cell	rs112496823	17	33829583	C	A	0.1771	0.1585	0.03308	3410	1.72001e-06	22.9509
CD86+ plasmacytoid Dendritic Cell %Dendritic Cell	rs71381356	17	49908577	C	T	0.0845	-0.2097	0.04494	3410	3.176e-06	21.7672
CD86+ plasmacytoid Dendritic Cell %Dendritic Cell	rs150206669	18	66297295	G	C	0.0125	-0.4931	0.1106	3410	8.45493e-06	19.8716
CD86+ plasmacytoid Dendritic Cell %Dendritic Cell	rs62131897	19	10622478	C	G	0.0047	-0.8171	0.1836	3410	8.85299e-06	19.8006
CD86+ plasmacytoid Dendritic Cell %Dendritic Cell	rs9607320	22	22202164	T	C	0.6037	0.1192	0.02572	3410	3.67198e-06	21.4725
CD62L- myeloid Dendritic Cell Absolute Count	rs74341264	1	161561151	A	G	0.1219	-0.4066	0.03995	3387	5.48656e-24	103.555
CD62L- myeloid Dendritic Cell Absolute Count	rs71632979	1	161526397	G	A	0.2449	0.8094	0.02787	3387	9.84011e-166	843.188
CD62L- myeloid Dendritic Cell Absolute Count	rs17438107	1	162920561	T	A	0.0921	0.2161	0.04523	3387	1.83502e-06	22.8207
CD62L- myeloid Dendritic Cell Absolute Count	rs143140559	1	160972255	T	C	0.0094	0.8211	0.1303	3387	3.33903e-10	39.6986
CD62L- myeloid Dendritic Cell Absolute Count	rs71639910	1	161937774	A	G	0.0686	0.401	0.05202	3387	1.66303e-14	59.4046
CD62L- myeloid Dendritic Cell Absolute Count	rs147678401	1	161035780	A	G	0.0437	0.3306	0.06429	3387	2.86101e-07	26.4357
CD62L- myeloid Dendritic Cell Absolute Count	rs10779896	2	4613050	T	A	0.0633	-0.2364	0.05339	3387	9.82992e-06	19.5996
CD62L- myeloid Dendritic Cell Absolute Count	rs73172229	3	179194521	T	C	0.1233	-0.1908	0.03986	3387	1.77101e-06	22.9062
CD62L- myeloid Dendritic Cell Absolute Count	rs13148506	4	43123482	T	C	0.3691	0.1304	0.02714	3387	1.61901e-06	23.0785
CD62L- myeloid Dendritic Cell Absolute Count	rs116910026	11	19877912	T	C	0.0512	0.2902	0.05778	3387	5.38704e-07	25.218
CD62L- myeloid Dendritic Cell Absolute Count	rs4997747	12	127036550	C	T	0.2917	0.1346	0.02844	3387	2.29198e-06	22.3925
CD62L- myeloid Dendritic Cell Absolute Count	rs11830537	12	48157703	T	C	0.0371	-0.314	0.06982	3387	7.11705e-06	20.2195
CD62L- myeloid Dendritic Cell Absolute Count	rs17071426	13	48733325	T	C	0.0084	-0.6001	0.135	3387	9.04295e-06	19.7538
CD62L- myeloid Dendritic Cell Absolute Count	rs35519924	15	81119490	A	G	0.3276	0.1281	0.02803	3387	5.03802e-06	20.8797
CD62L- myeloid Dendritic Cell Absolute Count	rs112701148	18	10175131	T	G	0.0697	-0.2301	0.05114	3387	7.05895e-06	20.2387
CD62L- myeloid Dendritic Cell Absolute Count	rs112501424	19	3045627	T	C	0.1305	0.1694	0.03788	3387	8.03693e-06	19.993
CD62L- myeloid Dendritic Cell Absolute Count	rs5767014	22	48474288	C	T	0.7772	-0.1397	0.03083	3387	6.08303e-06	20.5266
CD62L- myeloid Dendritic Cell %Dendritic Cell	rs6537835	1	115108914	A	G	0.8488	-0.1661	0.0368	3410	6.55798e-06	20.3665
CD62L- myeloid Dendritic Cell %Dendritic Cell	rs74341264	1	161561151	A	G	0.1218	-0.4263	0.03928	3410	5.29176e-27	117.75
CD62L- myeloid Dendritic Cell %Dendritic Cell	rs147678401	1	161035780	A	G	0.0437	0.3059	0.06344	3410	1.48102e-06	23.2437
CD62L- myeloid Dendritic Cell %Dendritic Cell	rs34558449	1	192566347	C	G	0.0846	0.2273	0.04585	3410	7.51208e-07	24.5693
CD62L- myeloid Dendritic Cell %Dendritic Cell	rs143140559	1	160972255	T	C	0.0094	0.7929	0.1294	3410	1.00501e-09	37.5354
CD62L- myeloid Dendritic Cell %Dendritic Cell	rs17438107	1	162920561	T	A	0.0919	0.1995	0.04469	3410	8.32492e-06	19.9222
CD62L- myeloid Dendritic Cell %Dendritic Cell	rs71632979	1	161526397	G	A	0.2447	0.8232	0.02725	3410	8.531e-178	912.327
CD62L- myeloid Dendritic Cell %Dendritic Cell	rs71639910	1	161937774	A	G	0.0688	0.4169	0.05126	3410	5.85868e-16	66.1271
CD62L- myeloid Dendritic Cell %Dendritic Cell	rs10779896	2	4613050	T	A	0.0632	-0.2427	0.05258	3410	4.04297e-06	21.2996
CD62L- myeloid Dendritic Cell %Dendritic Cell	rs143586943	3	55606125	A	G	0.001	-1.817	0.4068	3410	8.18295e-06	19.9444
CD62L- myeloid Dendritic Cell %Dendritic Cell	rs16864449	3	189220585	G	A	0.0026	-1.124	0.2398	3410	2.83903e-06	21.9638
CD62L- myeloid Dendritic Cell %Dendritic Cell	rs17637703	3	45440721	G	A	0.2437	0.1393	0.03014	3410	3.94103e-06	21.3544
CD62L- myeloid Dendritic Cell %Dendritic Cell	rs530300575	4	3387723	G	A	0.0038	-1.019	0.2169	3410	2.733e-06	22.0649
CD62L- myeloid Dendritic Cell %Dendritic Cell	rs62300075	4	43118540	C	A	0.3707	0.1382	0.02676	3410	2.524e-07	26.6635
CD62L- myeloid Dendritic Cell %Dendritic Cell	rs75220521	6	81660130	G	T	0.0023	1.34	0.289	3410	3.67502e-06	21.4925
CD62L- myeloid Dendritic Cell %Dendritic Cell	rs3012723	9	134645623	C	T	0.9157	0.2018	0.04542	3410	9.14092e-06	19.7343
CD62L- myeloid Dendritic Cell %Dendritic Cell	rs181905377	9	138681023	T	C	0.0056	-0.748	0.1684	3410	9.20407e-06	19.7238
CD62L- myeloid Dendritic Cell %Dendritic Cell	rs149812305	11	5480718	C	T	0.0271	-0.3397	0.07614	3410	8.40795e-06	19.8993
CD62L- myeloid Dendritic Cell %Dendritic Cell	rs116910026	11	19877912	T	C	0.0512	0.273	0.05712	3410	1.82201e-06	22.8361
CD62L- myeloid Dendritic Cell %Dendritic Cell	rs7300606	12	108719667	C	T	0.7405	-0.1337	0.02998	3410	8.52393e-06	19.8826
CD62L- myeloid Dendritic Cell %Dendritic Cell	rs6492701	13	95043651	C	A	0.7111	-0.1278	0.02853	3410	7.75104e-06	20.06
CD62L- myeloid Dendritic Cell %Dendritic Cell	rs7148140	14	88587741	G	C	0.0682	0.2287	0.05156	3410	9.50802e-06	19.6689
CD62L- myeloid Dendritic Cell %Dendritic Cell	rs17780615	14	73029609	T	C	0.1226	-0.1776	0.03958	3410	7.44698e-06	20.1283
CD62L- myeloid Dendritic Cell %Dendritic Cell	rs72743439	15	67410088	T	C	0.0031	1.099	0.2389	3410	4.39602e-06	21.1561
CD62L- myeloid Dendritic Cell %Dendritic Cell	rs116473040	17	80291652	G	A	0.0198	0.4063	0.09051	3410	7.39997e-06	20.1453
CD62L- myeloid Dendritic Cell %Dendritic Cell	rs5767014	22	48474288	C	T	0.7776	-0.1514	0.03046	3410	6.94592e-07	24.6982
CD62L- plasmacytoid Dendritic Cell Absolute Count	rs4462104	1	36975893	C	T	0.2011	-0.1397	0.03017	3374	3.764e-06	21.4345
CD62L- plasmacytoid Dendritic Cell Absolute Count	rs12061996	1	167814385	G	A	0.0947	-0.1861	0.04131	3374	6.88906e-06	20.2887
CD62L- plasmacytoid Dendritic Cell Absolute Count	rs17224524	2	182346146	C	T	0.2945	-0.129	0.02753	3374	2.87098e-06	21.9502
CD62L- plasmacytoid Dendritic Cell Absolute Count	rs116054627	2	51168498	A	G	0.0413	0.3356	0.06158	3374	5.38505e-08	29.6917
CD62L- plasmacytoid Dendritic Cell Absolute Count	rs75472065	3	77076673	C	A	0.007	0.6561	0.1466	3374	7.89696e-06	20.0237
CD62L- plasmacytoid Dendritic Cell Absolute Count	rs4928176	3	98972835	A	G	0.525	0.111	0.02436	3374	5.425e-06	20.7569
CD62L- plasmacytoid Dendritic Cell Absolute Count	rs191779135	4	82502357	G	A	0.0865	-0.2628	0.04325	3374	1.376e-09	36.9105
CD62L- plasmacytoid Dendritic Cell Absolute Count	rs6535445	4	84151427	C	T	0.3435	-0.2794	0.02525	3374	5.62471e-28	122.406
CD62L- plasmacytoid Dendritic Cell Absolute Count	rs1472757	5	6455872	C	T	0.6057	-0.1252	0.02495	3374	5.45306e-07	25.1732
CD62L- plasmacytoid Dendritic Cell Absolute Count	rs1391986	5	52071311	T	G	0.0061	0.7317	0.1561	3374	2.87402e-06	21.965
CD62L- plasmacytoid Dendritic Cell Absolute Count	rs9502274	6	566060	T	A	0.2024	-0.1362	0.03052	3374	8.36604e-06	19.9093
CD62L- plasmacytoid Dendritic Cell Absolute Count	rs13201703	6	22921471	A	C	0.0508	0.252	0.05616	3374	7.45006e-06	20.1288
CD62L- plasmacytoid Dendritic Cell Absolute Count	rs9403901	6	148286133	A	G	0.1635	-0.1501	0.03311	3374	5.98205e-06	20.5454
CD62L- plasmacytoid Dendritic Cell Absolute Count	rs56374915	7	115086436	A	G	0.1119	-0.1835	0.03892	3374	2.52802e-06	22.2227
CD62L- plasmacytoid Dendritic Cell Absolute Count	rs72716416	8	131993230	T	C	0.0325	0.3081	0.06925	3374	8.87503e-06	19.7886
CD62L- plasmacytoid Dendritic Cell Absolute Count	rs118054784	8	130658684	A	G	0.0422	0.2985	0.0621	3374	1.59698e-06	23.0981
CD62L- plasmacytoid Dendritic Cell Absolute Count	rs116894787	10	12240106	C	G	0.0111	0.5376	0.1152	3374	3.18801e-06	21.7713
CD62L- plasmacytoid Dendritic Cell Absolute Count	rs7114664	11	22793001	C	T	0.1046	0.1874	0.0397	3374	2.44101e-06	22.2756
CD62L- plasmacytoid Dendritic Cell Absolute Count	rs61936377	12	63530291	C	T	0.2503	0.1364	0.02822	3374	1.39601e-06	23.3553
CD62L- plasmacytoid Dendritic Cell Absolute Count	rs16957038	13	100542252	A	G	0.0022	1.17	0.2465	3374	2.15298e-06	22.5221
CD62L- plasmacytoid Dendritic Cell Absolute Count	rs170697	14	83856849	A	G	0.507	0.1127	0.02415	3374	3.16403e-06	21.7713
CD62L- plasmacytoid Dendritic Cell Absolute Count	rs9900969	17	76194489	T	G	0.2107	0.1321	0.02954	3374	8.00903e-06	19.992
CD62L- plasmacytoid Dendritic Cell Absolute Count	rs11659751	18	55736723	A	T	0.0772	0.209	0.04558	3374	4.70804e-06	21.0192
CD62L- plasmacytoid Dendritic Cell Absolute Count	rs150918748	22	43446390	T	C	0.004	0.8677	0.1908	3374	5.63197e-06	20.6754
CD62L- plasmacytoid Dendritic Cell %Dendritic Cell	rs4462104	1	36975893	C	T	0.2009	-0.1401	0.03077	3410	5.46097e-06	20.725
CD62L- plasmacytoid Dendritic Cell %Dendritic Cell	rs55971447	1	161515326	T	C	0.2352	-0.3011	0.02899	3410	6.69885e-25	107.844
CD62L- plasmacytoid Dendritic Cell %Dendritic Cell	rs116054627	2	51168498	A	G	0.0411	0.2959	0.063	3410	2.73602e-06	22.0537
CD62L- plasmacytoid Dendritic Cell %Dendritic Cell	rs148594241	2	236709624	C	T	0.0324	-0.3282	0.07246	3410	6.11097e-06	20.5094
CD62L- plasmacytoid Dendritic Cell %Dendritic Cell	rs79976443	3	78714454	A	G	0.0462	-0.2638	0.05899	3410	7.96893e-06	19.9924
CD62L- plasmacytoid Dendritic Cell %Dendritic Cell	rs75472065	3	77076673	C	A	0.0072	0.6724	0.1479	3410	5.61694e-06	20.6629
CD62L- plasmacytoid Dendritic Cell %Dendritic Cell	rs62297340	4	5407389	A	C	0.1132	0.1816	0.03899	3410	3.30803e-06	21.6869
CD62L- plasmacytoid Dendritic Cell %Dendritic Cell	rs79659729	4	84265416	T	C	0.0456	-0.2731	0.06127	3410	8.53198e-06	19.8619
CD62L- plasmacytoid Dendritic Cell %Dendritic Cell	rs6535445	4	84151427	C	T	0.344	-0.3029	0.02564	3410	1.34803e-31	139.52
CD62L- plasmacytoid Dendritic Cell %Dendritic Cell	rs191779135	4	82502357	G	A	0.0867	-0.2664	0.04411	3410	1.721e-09	36.4642
CD62L- plasmacytoid Dendritic Cell %Dendritic Cell	rs148863428	4	107554477	A	G	0.0029	1.06	0.232	3410	5.07002e-06	20.8693
CD62L- plasmacytoid Dendritic Cell %Dendritic Cell	rs1835019	5	66583829	T	C	0.7415	0.1261	0.02791	3410	6.43799e-06	20.4072
CD62L- plasmacytoid Dendritic Cell %Dendritic Cell	rs56374915	7	115086436	A	G	0.1116	-0.1787	0.03964	3410	6.77407e-06	20.3168
CD62L- plasmacytoid Dendritic Cell %Dendritic Cell	rs62495198	8	13705385	T	A	0.4751	-0.1115	0.0251	3410	9.15208e-06	19.7276
CD62L- plasmacytoid Dendritic Cell %Dendritic Cell	rs61859443	10	43792983	A	G	0.005	0.7951	0.1781	3410	8.28591e-06	19.9245
CD62L- plasmacytoid Dendritic Cell %Dendritic Cell	rs146839224	10	131367364	A	G	0.0025	1.182	0.2447	3410	1.41899e-06	23.326
CD62L- plasmacytoid Dendritic Cell %Dendritic Cell	rs11000032	10	73619601	A	G	0.2843	0.1292	0.02767	3410	3.12802e-06	21.7961
CD62L- plasmacytoid Dendritic Cell %Dendritic Cell	rs182833362	16	27972325	A	G	0.0009	1.949	0.408	3410	1.86299e-06	22.8127
CD62L- plasmacytoid Dendritic Cell %Dendritic Cell	rs8044705	16	48914991	C	T	0.4141	0.1095	0.02473	3410	9.80099e-06	19.5998
CD62L- plasmacytoid Dendritic Cell %Dendritic Cell	rs3827963	20	20371744	G	A	0.3408	0.1206	0.02628	3410	4.61902e-06	21.0531
CD62L- CD86+ myeloid Dendritic Cell Absolute Count	rs147678401	1	161035780	A	G	0.0437	0.3417	0.06421	3387	1.09901e-07	28.3111
CD62L- CD86+ myeloid Dendritic Cell Absolute Count	rs74341264	1	161561151	A	G	0.1219	-0.4509	0.03985	3387	3.71535e-29	127.99
CD62L- CD86+ myeloid Dendritic Cell Absolute Count	rs2788088	1	2897093	A	G	0.6884	-0.1286	0.02736	3387	2.711e-06	22.0862
CD62L- CD86+ myeloid Dendritic Cell Absolute Count	rs71639910	1	161937774	A	G	0.0686	0.425	0.05195	3387	3.95913e-16	66.9081
CD62L- CD86+ myeloid Dendritic Cell Absolute Count	rs61808511	1	120116588	G	T	0.1676	0.1553	0.03474	3387	8.03304e-06	19.9781
CD62L- CD86+ myeloid Dendritic Cell Absolute Count	rs113995133	1	163485197	A	G	0.0103	-0.6066	0.1283	3387	2.381e-06	22.3472
CD62L- CD86+ myeloid Dendritic Cell Absolute Count	rs71632979	1	161526397	G	A	0.2449	0.9207	0.02691	3387	1e-200	1170.26
CD62L- CD86+ myeloid Dendritic Cell Absolute Count	rs6656063	1	157964856	T	C	0.2499	0.1319	0.02958	3387	8.53709e-06	19.8776
CD62L- CD86+ myeloid Dendritic Cell Absolute Count	rs77107932	1	162042160	C	A	0.0279	-0.4223	0.08238	3387	3.13098e-07	26.2706
CD62L- CD86+ myeloid Dendritic Cell Absolute Count	rs143140559	1	160972255	T	C	0.0094	0.7645	0.1298	3387	4.219e-09	34.6799
CD62L- CD86+ myeloid Dendritic Cell Absolute Count	rs10779896	2	4613050	T	A	0.0633	-0.2434	0.0534	3387	5.33605e-06	20.7697
CD62L- CD86+ myeloid Dendritic Cell Absolute Count	rs146507670	3	172101731	T	C	0.0136	-0.4935	0.1095	3387	6.80503e-06	20.3057
CD62L- CD86+ myeloid Dendritic Cell Absolute Count	rs162588	3	364098	A	G	0.2046	-0.1544	0.03158	3387	1.06101e-06	23.8969
CD62L- CD86+ myeloid Dendritic Cell Absolute Count	rs144101090	4	60446347	A	T	0.0186	-0.4201	0.09454	3387	9.12095e-06	19.7399
CD62L- CD86+ myeloid Dendritic Cell Absolute Count	rs112186537	6	73397623	T	C	0.0075	-0.691	0.1441	3387	1.69099e-06	22.9879
CD62L- CD86+ myeloid Dendritic Cell Absolute Count	rs117044176	7	11604044	A	G	0.0016	-1.385	0.3101	3387	8.27409e-06	19.942
CD62L- CD86+ myeloid Dendritic Cell Absolute Count	rs117690664	8	107693714	A	C	0.0007	-2.339	0.5107	3387	4.80596e-06	20.9701
CD62L- CD86+ myeloid Dendritic Cell Absolute Count	rs62489014	8	1144980	T	C	0.0133	-0.4885	0.11	3387	9.18904e-06	19.7158
CD62L- CD86+ myeloid Dendritic Cell Absolute Count	rs139956891	10	127556162	G	A	0.0616	0.2686	0.05451	3387	8.74601e-07	24.2734
CD62L- CD86+ myeloid Dendritic Cell Absolute Count	rs11830537	12	48157703	T	C	0.0371	-0.3134	0.06979	3387	7.35495e-06	20.1597
CD62L- CD86+ myeloid Dendritic Cell Absolute Count	rs135299	22	48479731	A	G	0.2166	0.1435	0.03123	3387	4.46396e-06	21.1072
CD62L- CD86+ myeloid Dendritic Cell %Dendritic Cell	rs2788088	1	2897093	A	G	0.6886	-0.1283	0.02719	3410	2.488e-06	22.2591
CD62L- CD86+ myeloid Dendritic Cell %Dendritic Cell	rs147678401	1	161035780	A	G	0.0437	0.3215	0.06383	3410	4.97496e-07	25.3621
CD62L- CD86+ myeloid Dendritic Cell %Dendritic Cell	rs71639910	1	161937774	A	G	0.0688	0.4245	0.05172	3410	3.15864e-16	67.3459
CD62L- CD86+ myeloid Dendritic Cell %Dendritic Cell	rs113995133	1	163485197	A	G	0.0103	-0.6516	0.1277	3410	3.53997e-07	26.0287
CD62L- CD86+ myeloid Dendritic Cell %Dendritic Cell	rs6537835	1	115108914	A	G	0.8488	-0.1706	0.03712	3410	4.48002e-06	21.1161
CD62L- CD86+ myeloid Dendritic Cell %Dendritic Cell	rs79078281	1	147922051	G	A	0.017	0.5118	0.1119	3410	4.99597e-06	20.9128
CD62L- CD86+ myeloid Dendritic Cell %Dendritic Cell	rs74341264	1	161561151	A	G	0.1218	-0.4505	0.03971	3410	2.65277e-29	128.666
CD62L- CD86+ myeloid Dendritic Cell %Dendritic Cell	rs71632979	1	161526397	G	A	0.2447	0.929	0.0268	3410	1e-200	1201.25
CD62L- CD86+ myeloid Dendritic Cell %Dendritic Cell	rs77107932	1	162042160	C	A	0.028	-0.4247	0.08194	3410	2.30802e-07	26.8562
CD62L- CD86+ myeloid Dendritic Cell %Dendritic Cell	rs143140559	1	160972255	T	C	0.0094	0.71	0.1289	3410	3.879e-08	30.3308
CD62L- CD86+ myeloid Dendritic Cell %Dendritic Cell	rs10779896	2	4613050	T	A	0.0632	-0.2429	0.05312	3410	5.00299e-06	20.9031
CD62L- CD86+ myeloid Dendritic Cell %Dendritic Cell	rs162588	3	364098	A	G	0.2048	-0.1411	0.03136	3410	7.09594e-06	20.2383
CD62L- CD86+ myeloid Dendritic Cell %Dendritic Cell	rs117690664	8	107693714	A	C	0.0007	-2.506	0.5056	3410	7.49394e-07	24.5596
CD62L- CD86+ myeloid Dendritic Cell %Dendritic Cell	rs144030104	8	40841454	T	C	0.0101	0.5823	0.1299	3410	7.55892e-06	20.0885
CD62L- CD86+ myeloid Dendritic Cell %Dendritic Cell	rs72659736	8	60780923	T	G	0.2557	0.1382	0.03068	3410	6.85394e-06	20.2851
CD62L- CD86+ myeloid Dendritic Cell %Dendritic Cell	rs139956891	10	127556162	G	A	0.0616	0.244	0.0541	3410	6.663e-06	20.3356
CD62L- CD86+ myeloid Dendritic Cell %Dendritic Cell	rs4761369	12	77743499	T	C	0.1861	0.1553	0.03329	3410	3.19198e-06	21.7564
CD62L- CD86+ myeloid Dendritic Cell %Dendritic Cell	rs113704374	12	106818887	G	C	0.0218	0.4006	0.0901	3410	9.03296e-06	19.7626
CD62L- CD86+ myeloid Dendritic Cell %Dendritic Cell	rs500809	20	3013136	A	G	0.5667	0.1195	0.02597	3410	4.37603e-06	21.1673
CD62L- CD86+ myeloid Dendritic Cell %Dendritic Cell	rs5767014	22	48474288	C	T	0.7776	-0.1396	0.03059	3410	5.18096e-06	20.8202
Plasmacytoid Dendritic Cell %Dendritic Cell	rs10910893	1	181160955	T	G	0.0707	-0.2262	0.04889	3410	3.85798e-06	21.4002
Plasmacytoid Dendritic Cell %Dendritic Cell	rs143032729	1	160353789	G	A	0.0326	-0.3966	0.07264	3410	5.11105e-08	29.8007
Plasmacytoid Dendritic Cell %Dendritic Cell	rs74341264	1	161561151	A	G	0.1218	0.2502	0.03866	3410	1.12001e-10	41.872
Plasmacytoid Dendritic Cell %Dendritic Cell	rs56199187	1	161520931	T	C	0.2441	-0.5887	0.02799	3410	1.96517e-92	442.237
Plasmacytoid Dendritic Cell %Dendritic Cell	rs7593638	2	111876941	C	A	0.4749	0.1305	0.02526	3410	2.52e-07	26.6825
Plasmacytoid Dendritic Cell %Dendritic Cell	rs2164210	2	136580287	C	T	0.3238	0.1236	0.02777	3410	8.76193e-06	19.8042
Plasmacytoid Dendritic Cell %Dendritic Cell	rs62234997	3	20754619	G	A	0.085	0.2108	0.04552	3410	3.77703e-06	21.4392
Plasmacytoid Dendritic Cell %Dendritic Cell	rs62272723	3	151963160	T	G	0.0501	-0.2775	0.05854	3410	2.21202e-06	22.4643
Plasmacytoid Dendritic Cell %Dendritic Cell	rs11715127	3	384169	C	G	0.1276	0.1657	0.03607	3410	4.48198e-06	21.0972
Plasmacytoid Dendritic Cell %Dendritic Cell	rs7566	5	179156449	C	T	0.9029	0.184	0.04158	3410	9.99701e-06	19.5767
Plasmacytoid Dendritic Cell %Dendritic Cell	rs196051	6	22056131	G	A	0.3971	-0.1221	0.02607	3410	2.90503e-06	21.9292
Plasmacytoid Dendritic Cell %Dendritic Cell	rs876036	7	50307710	C	T	0.2645	-0.1835	0.02885	3410	2.25201e-10	40.4439
Plasmacytoid Dendritic Cell %Dendritic Cell	rs78726632	7	14195723	C	G	0.0097	0.6212	0.1274	3410	1.14101e-06	23.7682
Plasmacytoid Dendritic Cell %Dendritic Cell	rs4398989	9	110238601	A	G	0.0422	-0.2853	0.06219	3410	4.65897e-06	21.0395
Plasmacytoid Dendritic Cell %Dendritic Cell	rs10759202	9	99462625	A	G	0.0477	-0.2618	0.05913	3410	9.85099e-06	19.5973
Plasmacytoid Dendritic Cell %Dendritic Cell	rs4752481	10	122700529	T	G	0.4535	-0.1258	0.0253	3410	6.93107e-07	24.7168
Plasmacytoid Dendritic Cell %Dendritic Cell	rs79053113	10	133341271	T	C	0.0009	-1.939	0.4161	3410	3.264e-06	21.7086
Plasmacytoid Dendritic Cell %Dendritic Cell	rs607867	11	107542351	C	G	0.0048	-0.868	0.1904	3410	5.31496e-06	20.7768
Plasmacytoid Dendritic Cell %Dendritic Cell	rs75812106	11	108509865	T	C	0.007	0.679	0.1509	3410	7.04596e-06	20.2411
Plasmacytoid Dendritic Cell %Dendritic Cell	rs28595889	12	61698548	T	A	0.677	0.1222	0.02739	3410	8.31802e-06	19.899
Plasmacytoid Dendritic Cell %Dendritic Cell	rs10735429	12	108726677	G	A	0.7411	0.1338	0.02924	3410	4.91802e-06	20.9329
Plasmacytoid Dendritic Cell %Dendritic Cell	rs73180904	13	44765322	T	C	0.0842	-0.2075	0.04577	3410	5.99501e-06	20.5469
Plasmacytoid Dendritic Cell %Dendritic Cell	rs690924	15	50067248	T	C	0.0264	0.3577	0.07936	3410	6.77798e-06	20.3099
Plasmacytoid Dendritic Cell %Dendritic Cell	rs12951038	17	77544550	T	C	0.0745	0.2104	0.04683	3410	7.24303e-06	20.1797
Plasmacytoid Dendritic Cell %Dendritic Cell	rs203393	20	56242563	A	G	0.5792	-0.1217	0.02505	3410	1.23501e-06	23.596
HLA DR++ monocyte %monocyte	rs76950373	1	70942862	C	T	0.1367	0.1622	0.0366	3595	9.5971e-06	19.6344
HLA DR++ monocyte %monocyte	rs9439731	1	19059471	C	T	0.3644	-0.1231	0.02626	3595	2.85102e-06	21.9688
HLA DR++ monocyte %monocyte	rs7538058	1	166381821	G	T	0.7944	0.1374	0.03081	3595	8.531e-06	19.8824
HLA DR++ monocyte %monocyte	rs116670542	2	217877436	A	G	0.0008	-1.812	0.3917	3595	3.84601e-06	21.3938
HLA DR++ monocyte %monocyte	rs187260865	2	106940570	T	C	0.0185	-0.5052	0.09405	3595	8.30902e-08	28.8462
HLA DR++ monocyte %monocyte	rs17023874	2	39734023	T	C	0.0421	-0.2782	0.06213	3595	7.74694e-06	20.0443
HLA DR++ monocyte %monocyte	rs7624992	3	3233271	T	C	0.1139	-0.1735	0.03914	3595	9.56908e-06	19.6443
HLA DR++ monocyte %monocyte	rs2878953	3	180110875	T	C	0.0771	0.2039	0.04605	3595	9.82992e-06	19.5999
HLA DR++ monocyte %monocyte	rs62395272	6	31394424	T	C	0.2819	-0.2295	0.03657	3595	3.90598e-10	39.3726
HLA DR++ monocyte %monocyte	rs9271281	6	32581059	T	C	0.5808	-0.3029	0.03046	3595	5.37155e-23	98.8594
HLA DR++ monocyte %monocyte	rs9271768	6	32594188	G	A	0.4356	-0.2475	0.03213	3595	1.68384e-14	59.321
HLA DR++ monocyte %monocyte	rs9296042	6	32736005	T	C	0.5013	-0.1923	0.02928	3595	5.86138e-11	43.1217
HLA DR++ monocyte %monocyte	rs9469094	6	32223191	C	G	0.0861	0.3326	0.05164	3595	1.35101e-10	41.4716
HLA DR++ monocyte %monocyte	rs116322630	6	15221128	T	C	0.0633	0.2678	0.05377	3595	6.63804e-07	24.7982
HLA DR++ monocyte %monocyte	rs2090888	6	109646216	T	A	0.6394	0.1173	0.02647	3595	9.67208e-06	19.6321
HLA DR++ monocyte %monocyte	rs2113347	8	3175873	C	G	0.2826	-0.1283	0.02784	3595	4.20397e-06	21.2322
HLA DR++ monocyte %monocyte	rs61835728	10	10550265	T	C	0.0103	-0.5588	0.1253	3595	8.39093e-06	19.8834
HLA DR++ monocyte %monocyte	rs150066324	12	51947803	T	A	0.0129	0.5024	0.1131	3595	9.25699e-06	19.7266
HLA DR++ monocyte %monocyte	rs7953257	12	112684221	T	A	0.531	-0.1366	0.02719	3595	5.34995e-07	25.2326
HLA DR++ monocyte %monocyte	rs12436392	14	81293101	C	T	0.9897	0.5761	0.123	3595	2.943e-06	21.9313
HLA DR++ monocyte %monocyte	rs62083470	18	35262843	C	T	0.1305	-0.1742	0.03706	3595	2.68201e-06	22.0884
HLA DR++ monocyte %monocyte	rs10410907	19	41033109	T	C	0.1067	0.1843	0.04055	3595	5.65405e-06	20.6513
HLA DR++ monocyte %monocyte	rs6010756	20	61265397	C	A	0.0243	-0.3757	0.07989	3595	2.67202e-06	22.1094
HLA DR++ monocyte %leukocyte	rs9439732	1	19059473	T	A	0.4732	-0.1324	0.02523	3595	1.62401e-07	27.5309
HLA DR++ monocyte %leukocyte	rs35478452	1	248035843	C	G	0.0065	-0.7033	0.1514	3595	3.51504e-06	21.5729
HLA DR++ monocyte %leukocyte	rs115589615	2	106954936	T	C	0.0175	-0.4683	0.09513	3595	8.93203e-07	24.2266
HLA DR++ monocyte %leukocyte	rs9271768	6	32594188	G	A	0.4356	-0.2168	0.03267	3595	3.71878e-11	44.025
HLA DR++ monocyte %leukocyte	rs62395272	6	31394424	T	C	0.2819	-0.1829	0.03742	3595	1.06999e-06	23.8836
HLA DR++ monocyte %leukocyte	rs9270591	6	32561424	T	C	0.5793	-0.2715	0.03137	3595	7.43875e-18	74.8841
HLA DR++ monocyte %leukocyte	rs9296042	6	32736005	T	C	0.5013	-0.1611	0.02972	3595	6.34498e-08	29.3746
HLA DR++ monocyte %leukocyte	rs76115039	21	34394714	A	T	0.0017	1.447	0.3206	3595	6.63804e-06	20.3652
HLA DR++ monocyte %leukocyte	rs9615878	22	48806386	A	G	0.1097	0.1791	0.04031	3595	9.19602e-06	19.7353
HLA DR++ monocyte Absolute Count	rs12410580	1	160126020	A	G	0.0482	0.2562	0.05738	3579	8.27199e-06	19.9304
HLA DR++ monocyte Absolute Count	rs10753675	1	165314847	T	C	0.5617	0.1115	0.0249	3579	7.80998e-06	20.0461
HLA DR++ monocyte Absolute Count	rs115589615	2	106954936	T	C	0.0176	-0.4684	0.09367	3579	5.98494e-07	24.9983
HLA DR++ monocyte Absolute Count	rs138955284	3	154844527	T	G	0.0047	-0.9382	0.1848	3579	4.02504e-07	25.7671
HLA DR++ monocyte Absolute Count	rs114141703	3	197226213	A	C	0.025	0.3833	0.08005	3579	1.74699e-06	22.921
HLA DR++ monocyte Absolute Count	rs74827437	4	109128418	G	A	0.1018	0.1903	0.04129	3579	4.20504e-06	21.2357
HLA DR++ monocyte Absolute Count	rs12659610	5	65872759	A	G	0.0043	0.8519	0.1886	3579	6.47799e-06	20.3973
HLA DR++ monocyte Absolute Count	rs73576356	6	147436169	T	A	0.0379	-0.2957	0.06466	3579	4.98001e-06	20.9079
HLA DR++ monocyte Absolute Count	rs9272459	6	32605578	A	G	0.5423	-0.1649	0.02958	3579	2.66397e-08	31.0687
HLA DR++ monocyte Absolute Count	rs62395272	6	31394424	T	C	0.2812	-0.1767	0.0353	3579	5.79402e-07	25.0497
HLA DR++ monocyte Absolute Count	rs9275271	6	32662533	C	T	0.6292	0.2356	0.03057	3579	1.67494e-14	59.3797
HLA DR++ monocyte Absolute Count	rs112700313	6	127699589	T	C	0.0022	-1.116	0.2489	3579	7.59399e-06	20.0982
HLA DR++ monocyte Absolute Count	rs28610544	7	106771703	T	C	0.1692	0.1685	0.03275	3579	2.831e-07	26.464
HLA DR++ monocyte Absolute Count	rs117433119	7	45664941	C	A	0.0022	1.226	0.269	3579	5.30799e-06	20.7661
HLA DR++ monocyte Absolute Count	rs16901587	8	127636944	A	G	0.202	-0.1396	0.03069	3579	5.61798e-06	20.685
HLA DR++ monocyte Absolute Count	rs35842632	9	25608163	T	G	0.2923	0.1193	0.02672	3579	8.22792e-06	19.929
HLA DR++ monocyte Absolute Count	rs4244738	9	66536402	G	A	0.9719	0.3959	0.08798	3579	6.99906e-06	20.2433
HLA DR++ monocyte Absolute Count	rs7310615	12	111865049	G	C	0.5222	-0.1431	0.02641	3579	6.40398e-08	29.3509
HLA DR++ monocyte Absolute Count	rs11169475	12	50914563	A	G	0.0296	-0.3396	0.07329	3579	3.71604e-06	21.4647
HLA DR++ monocyte Absolute Count	rs111801150	13	114508277	G	A	0.0013	-1.644	0.3396	3579	1.33999e-06	23.4286
HLA DR++ monocyte Absolute Count	rs55952218	16	73388512	A	G	0.0807	0.2123	0.04485	3579	2.28402e-06	22.4003
HLA DR++ monocyte Absolute Count	rs183181627	16	69003214	C	A	0.001	-1.803	0.3795	3579	2.10902e-06	22.5656
HLA DR++ monocyte Absolute Count	rs34795364	17	34011303	C	G	0.0011	-1.754	0.3818	3579	4.489e-06	21.0992
HLA DR++ monocyte Absolute Count	rs139181645	17	76469857	G	C	0.0451	-0.2801	0.05887	3579	2.03301e-06	22.6317
HLA DR++ monocyte Absolute Count	rs61289229	19	46392004	T	C	0.1133	0.1874	0.03947	3579	2.14902e-06	22.5363
HLA DR++ monocyte Absolute Count	rs5995959	22	22750190	T	C	0.0323	-0.3484	0.07506	3579	3.58798e-06	21.5386
CD4 regulatory T cell %CD4+ T cell	rs181741769	1	26999658	C	T	0.002	1.241	0.2679	3437	3.73603e-06	21.4522
CD4 regulatory T cell %CD4+ T cell	rs13410035	2	161139489	T	C	0.0346	-0.3267	0.06743	3437	1.322e-06	23.4674
CD4 regulatory T cell %CD4+ T cell	rs17009374	2	30532493	T	C	0.0103	0.5648	0.1239	3437	5.34097e-06	20.774
CD4 regulatory T cell %CD4+ T cell	rs4685760	3	4602747	C	G	0.4693	-0.1117	0.02502	3437	8.30195e-06	19.9253
CD4 regulatory T cell %CD4+ T cell	rs12186662	5	90356197	G	A	0.6123	-0.1134	0.0254	3437	8.30692e-06	19.9266
CD4 regulatory T cell %CD4+ T cell	rs77142596	6	163753664	T	C	0.0371	-0.307	0.06687	3437	4.57804e-06	21.0711
CD4 regulatory T cell %CD4+ T cell	rs2187822	6	32449726	C	A	0.3251	-0.1531	0.03337	3437	4.65704e-06	21.0432
CD4 regulatory T cell %CD4+ T cell	rs191172032	7	148149143	A	G	0.0253	0.3869	0.0825	3437	2.83302e-06	21.9869
CD4 regulatory T cell %CD4+ T cell	rs77615103	7	37406370	A	C	0.1484	0.1876	0.03743	3437	5.62199e-07	25.1131
CD4 regulatory T cell %CD4+ T cell	rs138899232	8	10768753	T	G	0.112	0.1934	0.04306	3437	7.26708e-06	20.1669
CD4 regulatory T cell %CD4+ T cell	rs1571025	10	6134869	G	A	0.1766	0.2422	0.0339	3437	1.10892e-12	51.0296
CD4 regulatory T cell %CD4+ T cell	rs6602392	10	6078079	A	C	0.1155	0.2173	0.03926	3437	3.33703e-08	30.6262
CD4 regulatory T cell %CD4+ T cell	rs73018933	11	128174781	A	G	0.1785	-0.1478	0.03295	3437	7.56206e-06	20.1146
CD4 regulatory T cell %CD4+ T cell	rs77071786	12	23501010	C	G	0.0598	-0.2858	0.05432	3437	1.51901e-07	27.6744
CD4 regulatory T cell %CD4+ T cell	rs149595513	14	56535269	T	C	0.0031	1.04	0.227	3437	4.78597e-06	20.984
CD4 regulatory T cell %CD4+ T cell	rs146090095	14	25035095	T	A	0.0708	-0.2227	0.04891	3437	5.48302e-06	20.7262
CD4 regulatory T cell %CD4+ T cell	rs79028902	16	84427121	T	C	0.1251	-0.1713	0.03867	3437	9.77192e-06	19.6173
CD4 regulatory T cell %CD4+ T cell	rs72821912	17	30183388	T	C	0.045	0.2845	0.06114	3437	3.38197e-06	21.6465
CD4 regulatory T cell %CD4+ T cell	rs2909902	19	47667326	A	T	0.2784	-0.1357	0.02779	3437	1.08101e-06	23.8373
CD4 regulatory T cell %CD4+ T cell	rs6016476	20	39570656	G	A	0.3688	0.1213	0.02643	3437	4.56604e-06	21.0572
CD4 regulatory T cell %T cell	rs79327855	3	144158111	T	C	0.0009	-1.849	0.3895	3437	2.14798e-06	22.5285
CD4 regulatory T cell %T cell	rs76239041	5	153002618	A	G	0.0412	0.3211	0.06468	3437	7.21805e-07	24.6385
CD4 regulatory T cell %T cell	rs219948	6	12155899	A	G	0.262	0.1335	0.02947	3437	6.10506e-06	20.5152
CD4 regulatory T cell %T cell	rs2975007	6	29902327	T	G	0.4342	-0.1628	0.0337	3437	1.42099e-06	23.3304
CD4 regulatory T cell %T cell	rs971864	6	164597687	T	C	0.4588	0.1181	0.02572	3437	4.56499e-06	21.0781
CD4 regulatory T cell %T cell	rs115707165	7	81108132	T	C	0.0033	-1.047	0.2348	3437	8.49298e-06	19.8779
CD4 regulatory T cell %T cell	rs28445004	8	34560021	C	T	0.0148	0.46	0.1039	3437	9.87302e-06	19.5956
[truncated: 16,730 more rows]

## Sheet: Table S3.
Table S3. The instruments variables for plasma metabolites.
Exposure	SNP	Effect_allele	Other_allele	Effect_allele_frequency	Beta	Standard_error	Samplesize	P_value	F_statistics
Carnitine levels	rs7537155	A	G	0.199113	-0.0900652	0.019229	8192	2.81588e-06	21.9355
Carnitine levels	rs78562549	T	G	0.00740514	0.394897	0.0881915	8192	7.54445e-06	20.0475
Carnitine levels	rs4254516	C	G	0.455659	-0.0700485	0.0152171	8192	4.15883e-06	21.1876
Carnitine levels	rs12692101	T	A	0.444305	-0.0812856	0.0159379	8192	3.3939e-07	26.0083
Carnitine levels	rs13026148	A	G	0.378223	-0.0706059	0.0158653	8192	8.57356e-06	19.8031
Carnitine levels	rs73025372	G	A	0.0515375	0.157569	0.0346167	8192	5.31831e-06	20.7165
Carnitine levels	rs115168226	G	A	0.00618191	-0.446554	0.097039	8192	4.18852e-06	21.174
Carnitine levels	rs10006723	T	G	0.052858	0.170956	0.0345341	8192	7.40711e-07	24.503
Carnitine levels	rs1511808	T	C	0.615503	-0.0697692	0.0157378	8192	9.28299e-06	19.6511
Carnitine levels	rs7705826	G	T	0.833702	0.199276	0.0204928	8192	2.37787e-22	94.5484
Carnitine levels	rs149235996	G	A	0.0120372	-0.56909	0.0700396	8192	4.46387e-16	66.0118
Carnitine levels	rs72836546	T	C	0.23482	-0.0906795	0.0180707	8192	5.22043e-07	25.1777
Carnitine levels	rs112819917	A	G	0.00817656	-0.438422	0.0855532	8192	2.98241e-07	26.2578
Carnitine levels	rs13247874	T	C	0.190234	-0.103668	0.0195859	8192	1.20324e-07	28.0123
Carnitine levels	rs78428648	A	G	0.0377174	0.179162	0.0400467	8192	7.68304e-06	20.0127
Carnitine levels	rs79717472	G	A	0.0280471	-0.218081	0.0461728	8192	2.32235e-06	22.3054
Carnitine levels	rs76187828	G	A	0.0930578	-0.117619	0.0264472	8192	8.69448e-06	19.7762
Carnitine levels	rs10900223	C	T	0.250122	-0.105448	0.0176162	8192	2.15271e-09	35.8261
Carnitine levels	rs10826332	A	T	0.0770596	-0.142187	0.0286481	8192	6.9336e-07	24.6306
Carnitine levels	rs1171617	T	G	0.770118	0.443332	0.0179927	8192	4.75726e-134	607.033
Carnitine levels	rs138190991	A	T	0.0301671	-0.212246	0.0448917	8192	2.26798e-06	22.3508
Carnitine levels	rs55775057	A	G	0.150493	-0.0960378	0.0215564	8192	8.38207e-06	19.8463
Carnitine levels	rs2512510	A	G	0.216759	-0.0870239	0.0186419	8192	3.03877e-06	21.7893
Carnitine levels	rs76638161	T	C	0.0318954	0.192728	0.0434891	8192	9.35172e-06	19.637
Carnitine levels	rs2625939	T	C	0.228206	0.0859678	0.0183528	8192	2.81073e-06	21.9389
Carnitine levels	rs1765260	A	G	0.153343	-0.0999797	0.0211507	8192	2.27832e-06	22.342
Carnitine levels	rs11871125	T	C	0.394949	0.072665	0.0157893	8192	4.1814e-06	21.1774
Carnitine levels	rs73006619	C	A	0.0466597	-0.168203	0.0368665	8192	5.05538e-06	20.8138
Benzoate levels	rs72638543	T	C	0.0417238	0.185887	0.0404404	7306	4.29519e-06	21.1255
Benzoate levels	rs9943251	A	G	0.315014	0.0830144	0.0176575	7306	2.58422e-06	22.0998
Benzoate levels	rs149187032	A	G	0.0116664	-0.341939	0.0762734	7306	7.3576e-06	20.0952
Benzoate levels	rs186382517	C	T	0.00144389	1.05299	0.215383	7306	1.01397e-06	23.8983
Benzoate levels	rs141054369	T	C	0.00796594	-0.413333	0.0922709	7306	7.47975e-06	20.0637
Benzoate levels	rs62192967	T	A	0.0543493	-0.163284	0.0362749	7306	6.7542e-06	20.2589
Benzoate levels	rs113989462	G	C	0.0159655	0.298062	0.0656385	7306	5.5997e-06	20.6175
Benzoate levels	rs9863931	T	C	0.132697	-0.108363	0.0240017	7306	6.33735e-06	20.3807
Benzoate levels	rs149023824	G	A	0.00253668	0.721556	0.162488	7306	8.96732e-06	19.7169
Benzoate levels	rs11749139	G	T	0.0382593	-0.191343	0.0427947	7306	7.77842e-06	19.9888
Benzoate levels	rs73801273	T	C	0.0261245	0.243319	0.0511669	7306	1.98052e-06	22.6107
Benzoate levels	rs117191976	T	G	0.00442784	0.561037	0.121863	7306	4.14808e-06	21.1924
Benzoate levels	rs6468762	A	G	0.0144798	0.319567	0.068531	7306	3.1148e-06	21.7415
Benzoate levels	rs11166865	A	C	0.700507	-0.0846751	0.018635	7306	5.52263e-06	20.644
Benzoate levels	rs181702052	C	G	0.00337001	0.703091	0.141266	7306	6.455e-07	24.7679
Benzoate levels	rs533126002	C	T	0.00384615	0.600846	0.132243	7306	5.53254e-06	20.6406
Benzoate levels	rs2749463	C	G	0.844828	-0.10725	0.022653	7306	2.19626e-06	22.4122
Benzoate levels	rs11625375	T	C	0.965631	-0.204178	0.045214	7306	6.30756e-06	20.3898
Benzoate levels	rs11070230	G	A	0.971915	-0.230238	0.0500968	7306	4.30982e-06	21.1191
Benzoate levels	rs62209511	T	C	0.0387693	-0.194544	0.0425626	7306	4.85941e-06	20.8891
Maltotriose levels	rs7525374	G	A	0.525656	0.0950368	0.0212325	4641	7.60482e-06	20.0303
Maltotriose levels	rs72670481	T	C	0.0444222	-0.287487	0.0506395	4641	1.36972e-08	32.2229
Maltotriose levels	rs79441497	G	A	0.0274713	0.282649	0.0627987	4641	6.76728e-06	20.2535
Maltotriose levels	rs147666382	A	G	0.0362508	-0.2699	0.0550729	4641	9.54593e-07	24.0124
Maltotriose levels	rs113410972	A	G	0.135389	0.141264	0.0309121	4641	4.88054e-06	20.8791
Maltotriose levels	rs9855944	A	G	0.360843	0.0992769	0.0216311	4641	4.44236e-06	21.0594
Maltotriose levels	rs62317587	C	A	0.0101798	-0.475907	0.103471	4641	4.23694e-06	21.1501
Maltotriose levels	rs75049736	G	A	0.0334302	-0.274871	0.0590191	4641	3.20362e-06	21.686
Maltotriose levels	rs117257402	T	C	0.00954654	0.523098	0.106839	4641	9.77447e-07	23.967
Maltotriose levels	rs150215008	T	C	0.044205	-0.229438	0.0505115	4641	5.56468e-06	20.628
Maltotriose levels	rs150000891	T	G	0.0219792	-0.322444	0.0705527	4641	4.87109e-06	20.8828
Maltotriose levels	rs12340914	G	A	0.413842	0.0942204	0.0211623	4641	8.49668e-06	19.8185
Maltotriose levels	rs1360005	C	T	0.510903	0.097467	0.0207116	4641	2.52725e-06	22.1408
Maltotriose levels	rs72552153	A	G	0.0123004	-0.451935	0.0933029	4641	1.27418e-06	23.4568
Maltotriose levels	rs3741902	C	T	0.201663	-0.113786	0.025745	4641	9.88314e-06	19.5298
Maltotriose levels	rs1426466	C	T	0.801944	-0.114917	0.0260009	4641	9.88191e-06	19.5298
Maltotriose levels	rs75183407	T	C	0.0230852	-0.330457	0.0688133	4641	1.56907e-06	23.0564
Maltotriose levels	rs1230433	A	G	0.655467	-0.105534	0.021612	4641	1.04432e-06	23.8397
Maltotriose levels	rs1254839	G	A	0.322023	-0.107757	0.0223276	4641	1.39183e-06	23.287
Maltotriose levels	rs3935534	C	G	0.682113	-0.105364	0.0225011	4641	2.83227e-06	21.9222
Maltotriose levels	rs78910814	C	T	0.036	-0.253193	0.055947	4641	6.0231e-06	20.4765
Maltotriose levels	rs112191400	T	C	0.0864496	-0.162748	0.0365529	4641	8.49127e-06	19.8196
Maltotriose levels	rs141782806	C	T	0.0169583	-0.367335	0.0795794	4641	3.91306e-06	21.3025
Maltotriose levels	rs6006574	C	G	0.0282214	0.285259	0.0623725	4641	4.7969e-06	20.9122
Hippurate levels	rs6443435	C	T	0.555966	0.0729509	0.0155727	8260	2.80605e-06	21.9422
Hippurate levels	rs114849156	A	G	0.0321241	0.19722	0.043393	8260	5.49424e-06	20.6543
Hippurate levels	rs62326335	G	C	0.236388	-0.0890288	0.0182274	8260	1.03783e-06	23.8539
Hippurate levels	rs1505993	T	C	0.0219714	-0.24093	0.0524855	8260	4.42373e-06	21.0693
Hippurate levels	rs76464474	T	G	0.00903651	0.398426	0.0814489	8260	9.99571e-07	23.9261
Hippurate levels	rs375709482	T	C	0.0190974	-0.255607	0.0555964	8260	4.27499e-06	21.1349
Hippurate levels	rs3779084	G	A	0.212634	0.0853795	0.0186386	8260	4.63251e-06	20.9811
Hippurate levels	rs10106654	C	A	0.15585	0.0933587	0.0209933	8260	8.70498e-06	19.774
Hippurate levels	rs10818729	C	T	0.678724	-0.0744274	0.0165535	8260	6.91823e-06	20.2131
Hippurate levels	rs2886306	T	C	0.645165	0.0716047	0.016209	8260	9.98048e-06	19.5127
Hippurate levels	rs7073480	C	T	0.886196	0.121973	0.0241952	8260	4.62648e-07	25.4107
Hippurate levels	rs12782560	T	C	0.0246989	0.224836	0.049354	8260	5.2242e-06	20.7508
Hippurate levels	rs1271526	T	C	0.824509	0.0916728	0.0200283	8260	4.71341e-06	20.9479
Hippurate levels	rs16909710	T	C	0.0418998	-0.19262	0.0384132	8260	5.31941e-07	25.1414
Hippurate levels	rs1038161	A	T	0.396795	-0.0698072	0.0156983	8260	8.71615e-06	19.7716
Hippurate levels	rs56266656	G	A	0.0243576	0.222284	0.0498262	8260	8.15059e-06	19.8998
Hippurate levels	rs138633790	A	G	0.0243022	-0.220573	0.0497508	8260	9.26909e-06	19.654
Hippurate levels	rs117019913	A	G	0.0285926	0.204165	0.0459125	8260	8.71489e-06	19.7719
Hippurate levels	rs72770519	A	G	0.162015	-0.0980699	0.0209321	8260	2.79769e-06	21.9479
Hippurate levels	rs72782456	G	A	0.0718974	-0.132885	0.0298174	8260	8.32618e-06	19.8591
Methionine sulfoxide levels	rs6706818	G	A	0.297934	0.076177	0.0168437	8243	6.10924e-06	20.4513
Methionine sulfoxide levels	rs146859626	C	T	0.0110218	-0.333664	0.0740513	8243	6.61053e-06	20.3002
Methionine sulfoxide levels	rs114588795	G	C	0.00783813	0.384825	0.0865739	8243	8.78741e-06	19.756
Methionine sulfoxide levels	rs3138108	T	C	0.230257	0.0870865	0.0182194	8243	1.75401e-06	22.8445
Methionine sulfoxide levels	rs162588	A	G	0.212029	0.0843917	0.0189141	8243	8.12626e-06	19.9056
Methionine sulfoxide levels	rs114314137	G	A	0.0085003	-0.37398	0.0844596	8243	9.51482e-06	19.6041
Methionine sulfoxide levels	rs4862595	T	C	0.6944	0.0750216	0.0167234	8243	7.25667e-06	20.122
Methionine sulfoxide levels	rs7708674	T	C	0.0742635	-0.13605	0.0295137	8243	4.032e-06	21.247
Methionine sulfoxide levels	rs1116046	T	A	0.0777355	-0.132929	0.0291497	8243	5.11035e-06	20.7931
Methionine sulfoxide levels	rs66676945	T	C	0.18189	0.0997286	0.0200715	8243	6.74151e-07	24.6847
Methionine sulfoxide levels	rs112196227	T	A	0.0757631	0.131339	0.0291534	8243	6.63451e-06	20.2935
Methionine sulfoxide levels	rs113966925	T	C	0.0264921	0.214979	0.0483488	8243	8.73154e-06	19.7682
Methionine sulfoxide levels	rs78631663	C	T	0.0180649	0.256598	0.0575554	8243	8.26193e-06	19.8738
Methionine sulfoxide levels	rs12216870	T	C	0.0196162	-0.256812	0.0555271	8243	3.74623e-06	21.3879
Methionine sulfoxide levels	rs74981086	A	G	0.0321797	-0.207867	0.044132	8243	2.47574e-06	22.1825
Methionine sulfoxide levels	rs1020048	C	A	0.809931	-0.102991	0.0198761	8243	2.19934e-07	26.8462
Methionine sulfoxide levels	rs76954145	T	C	0.0434198	-0.192677	0.0380845	8243	4.2103e-07	25.5924
Methionine sulfoxide levels	rs142260529	T	C	0.0147077	0.289855	0.0644979	8243	6.9889e-06	20.1938
Methionine sulfoxide levels	rs78762284	A	G	0.14571	0.1179	0.0220764	8243	9.26651e-08	28.518
Methionine sulfoxide levels	rs12323117	C	T	0.11287	-0.107817	0.0242782	8243	8.95865e-06	19.7192
Methionine sulfoxide levels	rs7990044	G	A	0.510057	0.0695317	0.0154663	8243	6.93449e-06	20.2088
Methionine sulfoxide levels	rs112256623	A	G	0.0237401	-0.222873	0.0498876	8243	7.91375e-06	19.9562
Methionine sulfoxide levels	rs72924553	G	A	0.0147202	0.29059	0.0641031	8243	5.81041e-06	20.5471
Methionine sulfoxide levels	rs390784	T	G	0.464723	0.076227	0.0154744	8243	8.39336e-07	24.2626
Methionine sulfoxide levels	rs146902454	C	T	0.0354437	-0.222442	0.0421167	8243	1.2809e-07	27.8915
Methionine sulfoxide levels	rs57419073	A	G	0.0856622	-0.125118	0.0275801	8243	5.71868e-06	20.5776
Xanthurenate levels	rs4654393	A	G	0.43716	-0.0716015	0.0157954	7965	5.8138e-06	20.5461
Xanthurenate levels	rs1339135	G	A	0.142632	-0.102275	0.0221736	7965	3.97938e-06	21.2722
Xanthurenate levels	rs4952404	T	C	0.209216	0.0900816	0.0193387	7965	3.1916e-06	21.6952
Xanthurenate levels	rs55953511	A	G	0.0251338	0.260906	0.0506967	7965	2.65512e-07	26.4822
Xanthurenate levels	rs354710	T	C	0.587063	0.0973775	0.0160404	7965	1.27297e-09	36.8496
Xanthurenate levels	rs4148325	T	C	0.326316	0.160369	0.0164451	7965	1.81218e-22	95.0853
Xanthurenate levels	rs142739097	G	A	0.0170605	-0.281069	0.0600788	7965	2.8921e-06	21.8841
Xanthurenate levels	rs74323113	T	G	0.0231871	0.240073	0.0515337	7965	3.18436e-06	21.6995
Xanthurenate levels	rs80253618	A	G	0.114498	0.145764	0.0245961	7965	3.09841e-09	35.1167
Xanthurenate levels	rs62344716	A	G	0.065916	-0.150456	0.0311209	7965	1.33435e-06	23.3701
Xanthurenate levels	rs189750460	C	T	0.0313286	0.201137	0.044222	7965	5.40694e-06	20.6849
Xanthurenate levels	rs115107012	A	G	0.00953162	0.355674	0.0792725	7965	7.23249e-06	20.1282
Xanthurenate levels	rs2762353	G	A	0.556451	0.108263	0.0156013	7965	3.93898e-12	48.1486
Xanthurenate levels	rs117446717	G	A	0.0107723	0.337234	0.0755884	7965	8.14081e-06	19.9021
Xanthurenate levels	rs610480	G	A	0.764105	0.0847289	0.0185433	7965	4.89465e-06	20.8754
Xanthurenate levels	rs148768795	A	G	0.0102144	-0.343757	0.0773679	7965	8.86512e-06	19.7391
Xanthurenate levels	rs41294573	T	C	0.0615182	0.148756	0.0320487	7965	3.45762e-06	21.5414
Xanthurenate levels	rs76961499	T	C	0.0443616	-0.174429	0.0379757	7965	4.36543e-06	21.0946
Xanthurenate levels	rs10901595	T	C	0.205555	-0.0850013	0.0190317	7965	7.95847e-06	19.9453
Xanthurenate levels	rs11037948	C	G	0.45907	-0.0757183	0.0157914	7965	1.62757e-06	22.9882
Xanthurenate levels	rs75152214	A	G	0.0494948	-0.1598	0.0360557	7965	9.33471e-06	19.6404
Xanthurenate levels	rs117776343	C	A	0.0229805	-0.254301	0.0519299	7965	9.73115e-07	23.9777
Xanthurenate levels	rs10518870	G	A	0.559125	0.0728152	0.0159215	7965	4.79876e-06	20.9133
Xanthurenate levels	rs150456440	A	G	0.0283656	-0.207866	0.0469472	7965	9.52642e-06	19.6017
Xanthurenate levels	rs8058114	A	G	0.167555	0.0980895	0.0207577	7965	2.29605e-06	22.3271
Xanthurenate levels	rs13038820	A	G	0.152841	-0.108314	0.0216513	7965	5.65531e-07	25.0234
N-alpha-acetylornithine levels	rs182387902	T	C	0.0100683	-0.469348	0.0920617	5606	3.42909e-07	25.9869
N-alpha-acetylornithine levels	rs10168931	A	G	0.237802	0.203073	0.02127	5606	1.32992e-21	91.1364
N-alpha-acetylornithine levels	rs758072	T	G	0.0731357	0.171213	0.0359573	5606	1.92102e-06	22.6685
N-alpha-acetylornithine levels	rs6846979	G	A	0.216337	0.101172	0.0223797	5606	6.1633e-06	20.4331
N-alpha-acetylornithine levels	rs13184558	C	T	0.038115	0.215007	0.0481609	5606	8.03104e-06	19.9268
N-alpha-acetylornithine levels	rs149122905	G	A	0.010359	0.414825	0.0905551	5606	4.62956e-06	20.981
N-alpha-acetylornithine levels	rs77556524	G	C	0.016622	-0.335972	0.0714166	5606	2.54621e-06	22.1274
N-alpha-acetylornithine levels	rs17360657	C	T	0.0336427	0.238255	0.0504986	5606	2.38105e-06	22.256
N-alpha-acetylornithine levels	rs117299913	C	T	0.0263158	0.27471	0.0585098	5606	2.66467e-06	22.0401
N-alpha-acetylornithine levels	rs4960616	C	T	0.06269	-0.187249	0.037458	5606	5.76543e-07	24.9846
N-alpha-acetylornithine levels	rs145450037	C	A	0.0109299	-0.417245	0.0891187	5606	2.84233e-06	21.9163
N-alpha-acetylornithine levels	rs117790062	T	C	0.0408473	0.207108	0.0466507	5606	9.01451e-06	19.7061
N-alpha-acetylornithine levels	rs4430142	C	G	0.987774	-0.395874	0.0878042	5606	6.52549e-06	20.3238
N-alpha-acetylornithine levels	rs13296886	G	C	0.0835143	-0.158395	0.0335323	5606	2.31636e-06	22.3089
N-alpha-acetylornithine levels	rs77300395	T	C	0.0258012	0.268952	0.0583612	5606	4.05768e-06	21.2336
N-alpha-acetylornithine levels	rs80205778	A	G	0.00948461	0.467453	0.0945412	5606	7.63638e-07	24.4431
N-alpha-acetylornithine levels	rs2125440	G	C	0.526382	0.0843011	0.0185782	5606	5.6889e-06	20.5865
N-alpha-acetylornithine levels	rs76075534	T	C	0.0424259	-0.205346	0.0457631	5606	7.21786e-06	20.1309
N-alpha-acetylornithine levels	rs117413891	T	C	0.016178	0.333876	0.0723372	5606	3.92063e-06	21.2995
N-alpha-acetylornithine levels	rs62053878	T	C	0.0191106	-0.307882	0.0672143	5606	4.63646e-06	20.9782
N-alpha-acetylornithine levels	rs8084246	A	G	0.281514	0.101796	0.02024	5606	4.91927e-07	25.2908
N-alpha-acetylornithine levels	rs6507370	C	T	0.373838	0.0923915	0.0189886	5606	1.14088e-06	23.6701
N-alpha-acetylornithine levels	rs9981625	C	G	0.372672	-0.0899526	0.0201886	5606	8.36509e-06	19.849
3-methylhistidine levels	rs114734560	T	C	0.0102702	-0.35764	0.076823	8289	3.23383e-06	21.6699
3-methylhistidine levels	rs7516441	A	G	0.117381	0.109101	0.0246539	8289	9.63078e-06	19.581
3-methylhistidine levels	rs12138831	T	G	0.0257563	-0.223214	0.0486608	8289	4.4935e-06	21.0393
3-methylhistidine levels	rs2797978	C	T	0.0929542	0.120013	0.0263768	8289	5.36565e-06	20.6995
3-methylhistidine levels	rs72879030	C	G	0.106939	-0.116576	0.0252142	8289	3.77474e-06	21.3735
3-methylhistidine levels	rs752834	A	G	0.194184	0.0925549	0.0194528	8289	1.95589e-06	22.6351
3-methylhistidine levels	rs10181994	T	A	0.691427	0.0821837	0.0169317	8289	1.21096e-06	23.5569
3-methylhistidine levels	rs185076690	T	C	0.0259039	0.211694	0.0478147	8289	9.53817e-06	19.5994
3-methylhistidine levels	rs73035811	A	G	0.0916234	0.121144	0.0268809	8289	6.58475e-06	20.3078
3-methylhistidine levels	rs146846950	A	G	0.00404492	-0.535769	0.120898	8289	9.35434e-06	19.6365
3-methylhistidine levels	rs10014780	G	A	0.159583	-0.0956574	0.0209224	8289	4.83094e-06	20.9007
3-methylhistidine levels	rs75256283	A	T	0.0592049	0.156459	0.0328215	8289	1.87007e-06	22.7212
3-methylhistidine levels	rs1857803	C	T	0.265217	-0.0823134	0.017447	8289	2.38263e-06	22.256
3-methylhistidine levels	rs2518573	G	T	0.738791	0.0801615	0.017558	8289	4.98237e-06	20.8415
3-methylhistidine levels	rs7746774	G	A	0.144171	-0.10469	0.021704	8289	1.41037e-06	23.2637
3-methylhistidine levels	rs117090299	C	T	0.0137094	-0.295449	0.0654447	8289	6.34695e-06	20.3781
3-methylhistidine levels	rs13234372	A	G	0.309524	-0.0821865	0.0166991	8289	8.58358e-07	24.2193
3-methylhistidine levels	rs17670800	A	G	0.205669	0.0880673	0.0190393	8289	3.73616e-06	21.3932
3-methylhistidine levels	rs10966648	T	C	0.745054	-0.0937684	0.0178574	8289	1.51321e-07	27.5692
3-methylhistidine levels	rs75782963	A	G	0.0271103	0.209933	0.0472735	8289	8.96138e-06	19.7185
3-methylhistidine levels	rs12553086	G	T	0.0669778	0.14967	0.0307172	8289	1.1018e-06	23.7385
3-methylhistidine levels	rs72997812	A	G	0.174747	0.0913382	0.0202172	8289	6.24738e-06	20.4085
3-methylhistidine levels	rs4142196	A	C	0.739059	-0.0772398	0.0173893	8289	8.92094e-06	19.7272
3-methylhistidine levels	rs9910668	C	A	0.675224	0.0739981	0.0163504	8289	6.01742e-06	20.4801
3-methylhistidine levels	rs11872731	A	G	0.0719668	0.135492	0.0304621	8289	8.67197e-06	19.7813
3-methylhistidine levels	rs149807477	T	C	0.0171107	-0.26129	0.0590671	8289	9.70658e-06	19.566
3-methylhistidine levels	rs117771460	A	G	0.0170496	0.264482	0.0597176	8289	9.47246e-06	19.6126
3-methylhistidine levels	rs138750865	T	C	0.0259304	0.229043	0.0483745	8289	2.19298e-06	22.4155
Glycerophosphorylcholine (GPC) levels	rs28631199	A	G	0.24412	0.0807118	0.0179643	8212	7.02641e-06	20.1837
Glycerophosphorylcholine (GPC) levels	rs77692382	T	C	0.249324	0.124343	0.0177226	8212	2.28252e-12	49.2192
Glycerophosphorylcholine (GPC) levels	rs74814187	T	C	0.0546213	0.158928	0.0336247	8212	2.28402e-06	22.3373
Glycerophosphorylcholine (GPC) levels	rs3738976	T	C	0.151338	-0.0972846	0.0213799	8212	5.35738e-06	20.7026
Glycerophosphorylcholine (GPC) levels	rs112779076	C	T	0.0536218	0.15285	0.0344046	8212	8.88357e-06	19.7354
Glycerophosphorylcholine (GPC) levels	rs75158623	A	T	0.0607305	0.144058	0.0320058	8212	6.76327e-06	20.2565
Glycerophosphorylcholine (GPC) levels	rs143156137	T	C	0.0166342	0.270431	0.059272	8212	5.05379e-06	20.8143
Glycerophosphorylcholine (GPC) levels	rs74420163	T	C	0.0368812	0.18549	0.0409257	8212	5.8326e-06	20.5398
Glycerophosphorylcholine (GPC) levels	rs192566258	A	T	0.0104651	-0.339794	0.0755404	8212	6.85374e-06	20.2311
Glycerophosphorylcholine (GPC) levels	rs112211203	T	G	0.0220984	0.234246	0.0515822	8212	5.59308e-06	20.6201
Glycerophosphorylcholine (GPC) levels	rs4715365	T	C	0.0518449	0.16235	0.0350163	8212	3.5449e-06	21.4937
Glycerophosphorylcholine (GPC) levels	rs117793976	C	G	0.0095729	-0.352368	0.0785058	8212	7.17504e-06	20.1436
Glycerophosphorylcholine (GPC) levels	rs9487777	C	G	0.0187874	-0.273645	0.0563802	8212	1.21261e-06	23.5542
Glycerophosphorylcholine (GPC) levels	rs11773889	T	C	0.221719	-0.0874834	0.0185441	8212	2.38644e-06	22.2529
Glycerophosphorylcholine (GPC) levels	rs117605274	G	A	0.0127869	0.325951	0.0691481	8212	2.43119e-06	22.2173
Glycerophosphorylcholine (GPC) levels	rs11783515	G	A	0.676129	-0.0742076	0.0165155	8212	7.01584e-06	20.1865
Glycerophosphorylcholine (GPC) levels	rs6981994	C	T	0.0174872	0.271135	0.0585165	8212	3.59568e-06	21.4665
Glycerophosphorylcholine (GPC) levels	rs10816075	T	C	0.164771	0.0973711	0.0205632	8212	2.18817e-06	22.4195
Glycerophosphorylcholine (GPC) levels	rs2015026	C	T	0.372436	-0.0725261	0.0160143	8212	5.93109e-06	20.5078
Glycerophosphorylcholine (GPC) levels	rs665474	T	A	0.281624	0.0744593	0.0168561	8212	9.99158e-06	19.5106
Glycerophosphorylcholine (GPC) levels	rs12800817	A	G	0.0394753	0.192118	0.0392089	8212	9.59083e-07	24.0057
Glycerophosphorylcholine (GPC) levels	rs4980965	C	T	0.448602	0.0708155	0.0158191	8212	7.58431e-06	20.0373
Glycerophosphorylcholine (GPC) levels	rs149395329	C	T	0.035363	0.186141	0.0419148	8212	8.95637e-06	19.7195
Glycerophosphorylcholine (GPC) levels	rs116900994	T	C	0.0468293	0.163415	0.036324	8212	6.83363e-06	20.2369
Glycerophosphorylcholine (GPC) levels	rs71468473	T	C	0.166274	0.102458	0.0206861	8212	7.30718e-07	24.5291
Glycerophosphorylcholine (GPC) levels	rs9510701	T	C	0.040562	0.173788	0.0386321	8212	6.84247e-06	20.2344
Glycerophosphorylcholine (GPC) levels	rs75275697	A	G	0.0162096	0.269422	0.060459	8212	8.3392e-06	19.856
Glycerophosphorylcholine (GPC) levels	rs141866706	C	T	0.0108575	-0.348062	0.0740522	8212	2.59877e-06	22.0894
Glycerophosphorylcholine (GPC) levels	rs557700	C	T	0.705143	0.0756793	0.016833	8212	6.92818e-06	20.2106
Glycerophosphorylcholine (GPC) levels	rs117568432	T	G	0.0959356	0.114159	0.0257192	8212	9.05148e-06	19.6994
Glycerophosphorylcholine (GPC) levels	rs72803677	T	G	0.0142254	-0.301878	0.0649424	8212	3.34525e-06	21.605
Glycerophosphorylcholine (GPC) levels	rs16973477	G	A	0.151329	0.0952092	0.0213323	8212	8.07672e-06	19.9173
Glycerophosphorylcholine (GPC) levels	rs8064391	G	A	0.984318	-0.291489	0.0626721	8212	3.303e-06	21.6293
Phenylacetate levels	rs7526830	C	T	0.113773	0.11933	0.0256291	7059	3.22345e-06	21.6756
Phenylacetate levels	rs76318294	G	T	0.084973	-0.131138	0.029682	7059	9.95725e-06	19.5168
Phenylacetate levels	rs72825080	C	T	0.0592908	-0.15323	0.0342299	7059	7.58803e-06	20.0362
Phenylacetate levels	rs76447789	G	A	0.00680658	-0.443571	0.0992982	7059	7.93008e-06	19.9518
Phenylacetate levels	rs3856733	G	C	0.300579	-0.0881978	0.0180229	7059	9.89884e-07	23.9444
Phenylacetate levels	rs1604572	G	C	0.317746	-0.0886552	0.0174741	7059	3.90507e-07	25.737
Phenylacetate levels	rs2632709	C	A	0.148365	0.104046	0.0228286	7059	5.17192e-06	20.7697
Phenylacetate levels	rs189587	A	G	0.432367	0.0806004	0.0164433	7059	9.50008e-07	24.0234
Phenylacetate levels	rs145721291	T	C	0.00662204	0.453464	0.100866	7059	6.93429e-06	20.2085
Phenylacetate levels	rs180982609	C	T	0.0051231	-0.500304	0.112894	7059	9.35214e-06	19.6365
Phenylacetate levels	rs73057725	A	G	0.0350404	0.222167	0.0444899	7059	5.92485e-07	24.933
Phenylacetate levels	rs76151544	G	A	0.0227109	-0.249151	0.0549946	7059	5.88542e-06	20.5222
Phenylacetate levels	rs148515684	A	G	0.0138573	0.329495	0.0697969	7059	2.34952e-06	22.2825
Phenylacetate levels	rs3809205	C	T	0.0434628	0.182025	0.0399238	7059	5.13238e-06	20.7844
Phenylacetate levels	rs150248294	A	G	0.0102142	-0.377677	0.080216	7059	2.49851e-06	22.1645
Phenylacetate levels	rs112192402	A	G	0.0311454	0.227703	0.0474027	7059	1.55855e-06	23.0712
Phenylacetate levels	rs78580580	C	A	0.017728	-0.294915	0.0614523	7059	1.59391e-06	23.028
Phenylacetate levels	rs8001043	C	T	0.693867	-0.0811984	0.0177149	7059	4.57013e-06	21.0066
Phenylacetate levels	rs76379382	T	C	0.054898	-0.160195	0.0358753	7059	7.99391e-06	19.9363
Phenylacetate levels	rs59532339	T	A	0.0235728	0.461097	0.0539542	7059	1.2734e-17	73.0252
Phenylacetate levels	rs7196912	T	C	0.0315558	0.225688	0.0462149	7059	1.04254e-06	23.8447
Phenylacetate levels	rs188124348	C	T	0.0125871	0.358611	0.0731176	7059	9.36257e-07	24.0515
Phenylacetate levels	rs16943430	A	G	0.034759	-0.199229	0.0444659	7059	7.44695e-06	20.0719
Phenylacetate levels	rs6566598	C	T	0.966004	-0.206029	0.0456208	7059	6.2986e-06	20.3924
Phenylacetate levels	rs117291585	T	C	0.0241775	0.241913	0.052514	7059	4.09221e-06	21.2181
Phenylacetate levels	rs1057157	C	T	0.356179	0.0763559	0.0171254	7059	8.24826e-06	19.8766
3-methyl-2-oxovalerate levels	rs6754181	C	T	0.840543	0.0910083	0.0204779	8257	8.82143e-06	19.7487
3-methyl-2-oxovalerate levels	rs7660693	C	T	0.497027	0.0791272	0.0148481	8257	9.86958e-08	28.396
3-methyl-2-oxovalerate levels	rs77291466	C	T	0.0806922	-0.12259	0.0272328	8257	6.74582e-06	20.2616
3-methyl-2-oxovalerate levels	rs12716450	T	C	0.0128564	0.295968	0.065473	8257	6.17051e-06	20.4321
3-methyl-2-oxovalerate levels	rs34372879	C	T	0.148723	-0.0947061	0.0213272	8257	8.96987e-06	19.7168
3-methyl-2-oxovalerate levels	rs56107485	C	A	0.0606153	-0.154962	0.0310005	8257	5.77179e-07	24.9839
3-methyl-2-oxovalerate levels	rs62524533	A	G	0.101178	-0.110404	0.0244676	8257	6.41459e-06	20.358
3-methyl-2-oxovalerate levels	rs183718435	A	C	0.0067402	-0.411296	0.091854	8257	7.54471e-06	20.0475
3-methyl-2-oxovalerate levels	rs11791075	T	A	0.752536	-0.0841116	0.0179331	8257	2.72804e-06	21.9962
3-methyl-2-oxovalerate levels	rs58729469	T	C	0.159259	0.101193	0.0201862	8257	5.35894e-07	25.1269
3-methyl-2-oxovalerate levels	rs145992024	T	C	0.0102986	-0.347476	0.0734813	8257	2.2589e-06	22.3585
3-methyl-2-oxovalerate levels	rs142461926	G	A	0.026332	-0.220081	0.0468793	8257	2.67075e-06	22.0369
3-methyl-2-oxovalerate levels	rs116943713	G	A	0.0274457	0.209966	0.0460722	8257	5.18093e-06	20.7667
3-methyl-2-oxovalerate levels	rs142174598	C	G	0.00644455	-0.420915	0.0935419	8257	6.80344e-06	20.2453
3-methyl-2-oxovalerate levels	rs77876488	T	C	0.0472576	-0.177185	0.0350913	8257	4.43549e-07	25.4919
3-methyl-2-oxovalerate levels	rs6055350	C	G	0.962906	-0.215685	0.0396894	8257	5.50013e-08	29.5283
3-methyl-2-oxovalerate levels	rs58693102	A	G	0.0331267	-0.187799	0.0414491	8257	5.87507e-06	20.526
Tartarate levels	rs116626434	A	G	0.0721524	-0.149526	0.0320676	7099	3.11891e-06	21.739
Tartarate levels	rs79983252	A	C	0.0301043	0.236427	0.0486249	7099	1.16058e-06	23.6383
Tartarate levels	rs138430505	C	T	0.0178748	0.285026	0.0624394	7099	4.9989e-06	20.8348
Tartarate levels	rs17026163	T	C	0.032701	-0.223964	0.0470413	7099	1.92634e-06	22.664
Tartarate levels	rs75583177	G	A	0.0701345	-0.145169	0.032432	7099	7.60113e-06	20.0327
Tartarate levels	rs76501568	T	C	0.02066	-0.267429	0.0587195	7099	5.2548e-06	20.7392
Tartarate levels	rs13089230	A	G	0.621953	0.0825424	0.0175787	7099	2.65821e-06	22.0455
Tartarate levels	rs10004542	G	A	0.340258	0.0814848	0.0176888	7099	4.09376e-06	21.2176
Tartarate levels	rs298392	T	C	0.28972	0.087711	0.0186612	7099	2.59941e-06	22.0886
Tartarate levels	rs115272033	C	T	0.0492451	-0.170179	0.0381431	7099	8.13534e-06	19.903
Tartarate levels	rs628038	C	T	0.386617	-0.0783007	0.0170337	7099	4.2902e-06	21.1277
Tartarate levels	rs10945808	T	C	0.0976838	-0.130904	0.0285309	7099	4.47212e-06	21.0481
Tartarate levels	rs10247649	G	A	0.344838	-0.0826258	0.0178465	7099	3.65988e-06	21.4321
Tartarate levels	rs143000803	T	A	0.0112878	0.368352	0.0789907	7099	3.11275e-06	21.7427
Tartarate levels	rs117483011	A	G	0.0595121	-0.157832	0.0354548	7099	8.52127e-06	19.8143
Tartarate levels	rs2468877	A	T	0.56753	-0.0762559	0.0170977	7099	8.19549e-06	19.8889
Tartarate levels	rs142959592	T	C	0.0106022	-0.373738	0.0817952	7099	4.89608e-06	20.8746
Tartarate levels	rs77798428	A	G	0.0184793	-0.318661	0.0614021	7099	2.10597e-07	26.9296
Tartarate levels	rs142997067	G	C	0.00388473	0.608221	0.134166	7099	5.80553e-06	20.5483
Tartarate levels	rs9948951	A	G	0.184827	-0.0971868	0.0214343	7099	5.78302e-06	20.5558
Tartarate levels	rs141660852	T	C	0.029224	0.228649	0.0493121	7099	3.53868e-06	21.4966
Tartarate levels	rs146593632	T	C	0.010688	0.370018	0.0815327	7099	5.67156e-06	20.5931
Tartarate levels	rs540278823	C	T	0.0322306	-0.210344	0.047106	7099	7.99472e-06	19.9364
Suberate (C8-DC) levels	rs145406199	A	G	0.0101441	0.37263	0.0837642	6902	8.64482e-06	19.7868
Suberate (C8-DC) levels	rs848290	T	A	0.068549	-0.165088	0.0330302	6902	5.79013e-07	24.9773
Suberate (C8-DC) levels	rs189725310	T	C	0.0547126	-0.167962	0.0363969	6902	3.9362e-06	21.2927
Suberate (C8-DC) levels	rs7616744	A	G	0.223816	-0.0876962	0.0198179	6902	9.63944e-06	19.5787
Suberate (C8-DC) levels	rs11705994	T	C	0.0297142	0.218723	0.0493421	6902	9.30183e-06	19.6467
Suberate (C8-DC) levels	rs4689177	T	C	0.144896	0.108829	0.023723	6902	4.48615e-06	21.042
Suberate (C8-DC) levels	rs34357043	G	T	0.0233082	0.266628	0.0551228	6902	1.31829e-06	23.393
Suberate (C8-DC) levels	rs4695288	T	C	0.965304	0.200323	0.0453191	6902	9.85766e-06	19.536
Suberate (C8-DC) levels	rs78440527	G	A	0.0359116	0.199278	0.0447114	6902	8.31185e-06	19.8618
Suberate (C8-DC) levels	rs10008401	C	T	0.609542	0.0800086	0.0170477	6902	2.68944e-06	22.0231
Suberate (C8-DC) levels	rs9313297	G	A	0.172813	0.0991772	0.0219344	6902	6.13931e-06	20.4413
Suberate (C8-DC) levels	rs9406110	A	G	0.229681	-0.0894199	0.0200898	6902	8.54658e-06	19.8086
Suberate (C8-DC) levels	rs539316238	T	C	0.0202821	-0.273918	0.059083	6902	3.54953e-06	21.4908
Suberate (C8-DC) levels	rs6923178	G	C	0.119895	0.121756	0.025941	6902	2.68478e-06	22.0264
Suberate (C8-DC) levels	rs6914551	C	T	0.011276	-0.366135	0.0791195	6902	3.69883e-06	21.4118
Suberate (C8-DC) levels	rs141183746	C	A	0.0572184	0.161019	0.0364413	6902	9.93437e-06	19.5211
Suberate (C8-DC) levels	rs17738405	C	T	0.0453877	-0.193637	0.0395206	6902	9.60098e-07	24.0031
Suberate (C8-DC) levels	rs146529314	G	T	0.0147642	0.336938	0.0697181	6902	1.34585e-06	23.3532
Suberate (C8-DC) levels	rs140580838	A	G	0.0145645	0.308493	0.0695392	6902	9.15411e-06	19.6774
Suberate (C8-DC) levels	rs148863405	C	G	0.00217928	0.798698	0.178207	6902	7.40014e-06	20.0841
Suberate (C8-DC) levels	rs12555229	G	C	0.250852	-0.0955533	0.0196317	6902	1.13142e-06	23.6871
Suberate (C8-DC) levels	rs35904890	T	C	0.0284364	-0.227287	0.0499103	6902	5.26594e-06	20.7351
Suberate (C8-DC) levels	rs11158833	G	A	0.759084	-0.0922378	0.0196709	6902	2.74475e-06	21.984
Suberate (C8-DC) levels	rs72777931	A	G	0.0147465	0.336072	0.0690214	6902	1.12109e-06	23.7047
Suberate (C8-DC) levels	rs1551619	T	C	0.230903	-0.0957862	0.0197795	6902	1.28083e-06	23.4484
Suberate (C8-DC) levels	rs117499033	G	A	0.0142545	0.30721	0.0691456	6902	8.87382e-06	19.7369
Suberate (C8-DC) levels	rs191920017	A	G	0.00922782	-0.399312	0.0879247	6902	5.58496e-06	20.6224
5-hydroxylysine levels	rs139663065	T	C	0.0148944	0.281865	0.0631701	8128	8.11986e-06	19.907
5-hydroxylysine levels	rs55700529	A	G	0.0170546	0.292762	0.0593343	8128	8.05186e-07	24.3425
5-hydroxylysine levels	rs76751577	A	G	0.0116681	0.322064	0.0713328	8128	6.333e-06	20.3823
5-hydroxylysine levels	rs78818599	G	T	0.0250279	-0.215533	0.0487937	8128	9.99777e-06	19.5095
5-hydroxylysine levels	rs9341222	C	T	0.0234238	0.230094	0.0513898	8128	7.55513e-06	20.0449
5-hydroxylysine levels	rs144429282	T	C	0.0119106	0.387083	0.0705729	8128	4.13767e-08	30.0801
5-hydroxylysine levels	rs12499749	A	G	0.0455162	0.176873	0.0364889	8128	1.25139e-06	23.4935
5-hydroxylysine levels	rs75233276	T	C	0.00972787	0.347685	0.0782868	8128	8.94701e-06	19.7216
5-hydroxylysine levels	rs1040519	G	A	0.708369	-0.0818991	0.0168315	8128	1.13978e-06	23.6733
5-hydroxylysine levels	rs1330804	A	G	0.405292	-0.0735292	0.0164301	8128	7.63159e-06	20.0256
5-hydroxylysine levels	rs73248769	C	T	0.00837335	0.397814	0.0842519	8128	2.33854e-06	22.2919
5-hydroxylysine levels	rs73429419	T	C	0.150779	-0.0978899	0.0214524	8128	5.03982e-06	20.8195
5-hydroxylysine levels	rs117462872	G	A	0.014046	0.286413	0.0645828	8128	9.21479e-06	19.6652
5-hydroxylysine levels	rs140233308	T	G	0.0116409	0.320974	0.0719087	8128	8.05839e-06	19.9216
5-hydroxylysine levels	rs999856	A	G	0.0257376	-0.215444	0.0485076	8128	8.93524e-06	19.724
5-hydroxylysine levels	rs10877499	C	T	0.212153	0.085716	0.0188366	8128	5.35153e-06	20.7045
5-hydroxylysine levels	rs41322846	C	G	0.0998263	0.113555	0.0256097	8128	9.24784e-06	19.6585
5-hydroxylysine levels	rs532070914	C	T	0.00309636	0.625391	0.138228	8128	6.05779e-06	20.4672
5-hydroxylysine levels	rs661331	T	A	0.103335	0.112287	0.025189	8128	8.28197e-06	19.8694
5-hydroxylysine levels	rs17533872	T	C	0.424131	0.0752854	0.0158196	8128	1.94553e-06	22.6452
5-hydroxylysine levels	rs1502069	T	C	0.764257	-0.0811985	0.0181157	8128	7.38717e-06	20.0878
5-hydroxylysine levels	rs9559451	C	T	0.664775	-0.0752947	0.0165065	8128	5.07846e-06	20.8049
5-hydroxylysine levels	rs3819547	C	G	0.0878938	-0.124927	0.0272675	8128	4.61627e-06	20.9879
5-hydroxylysine levels	rs58374597	A	T	0.0158799	0.610277	0.0609732	8128	1.39229e-23	100.167
5-hydroxylysine levels	rs6495304	A	G	0.973048	0.266767	0.0475445	8128	2.01281e-08	31.4782
5-hydroxylysine levels	rs3885951	G	A	0.0990508	0.578606	0.0249628	8128	7.46543e-119	537.187
5-hydroxylysine levels	rs74582811	G	A	0.0289046	0.227003	0.0458676	8128	7.45581e-07	24.4905
5-hydroxylysine levels	rs12901358	C	T	0.387751	0.070543	0.0157671	8128	7.67443e-06	20.0148
5-hydroxylysine levels	rs113983401	C	G	0.0498823	0.161297	0.0354213	8128	5.27173e-06	20.7334
5-hydroxylysine levels	rs115469488	A	G	0.00284936	-0.663355	0.14407	8128	4.13661e-06	21.1978
3-phenylpropionate hydrocinnamate levels	rs191187061	T	C	0.0178844	-0.304207	0.0586874	7925	2.1775e-07	26.8654
3-phenylpropionate hydrocinnamate levels	rs112307471	A	G	0.0250225	-0.238964	0.0506661	7925	2.40006e-06	22.2421
3-phenylpropionate hydrocinnamate levels	rs75223710	T	C	0.0257673	-0.219819	0.0494675	7925	8.84241e-06	19.744
3-phenylpropionate hydrocinnamate levels	rs145409686	C	T	0.0041228	-0.550427	0.120275	7925	4.73054e-06	20.9408
3-phenylpropionate hydrocinnamate levels	rs17767728	C	T	0.194635	0.0909404	0.0194777	7925	3.02745e-06	21.7963
3-phenylpropionate hydrocinnamate levels	rs74432647	T	C	0.0724275	0.150663	0.0304065	7925	7.23414e-07	24.5485
3-phenylpropionate hydrocinnamate levels	rs78674307	G	T	0.0557029	-0.150826	0.0340435	7925	9.40626e-06	19.6259
3-phenylpropionate hydrocinnamate levels	rs77831208	T	C	0.0208412	0.249552	0.0549664	7925	5.62337e-06	20.6097
3-phenylpropionate hydrocinnamate levels	rs187719086	T	C	0.0137168	-0.29344	0.0662578	7925	9.47782e-06	19.6115
3-phenylpropionate hydrocinnamate levels	rs146175767	T	C	0.0945706	-0.121342	0.0264241	7925	4.38776e-06	21.0847
3-phenylpropionate hydrocinnamate levels	rs116511059	T	C	0.0094268	0.400938	0.0799895	7925	5.37602e-07	25.1208
3-phenylpropionate hydrocinnamate levels	rs73478203	G	A	0.230375	0.0825426	0.0184542	7925	7.71921e-06	20.0037
3-phenylpropionate hydrocinnamate levels	rs147941428	G	A	0.0130043	-0.340237	0.0690333	7925	8.28252e-07	24.288
3-phenylpropionate hydrocinnamate levels	rs13283163	A	G	0.0526149	0.170526	0.0347529	7925	9.25742e-07	24.0738
3-phenylpropionate hydrocinnamate levels	rs141685561	T	C	0.0739347	-0.143423	0.0298661	7925	1.56938e-06	23.0582
3-phenylpropionate hydrocinnamate levels	rs2186671	G	A	0.448059	-0.0760014	0.016068	7925	2.24527e-06	22.3699
3-phenylpropionate hydrocinnamate levels	rs9510299	C	G	0.359614	-0.0736478	0.01656	7925	8.69424e-06	19.7763
3-phenylpropionate hydrocinnamate levels	rs79970883	T	C	0.042993	-0.195098	0.03888	7925	5.2225e-07	25.1767
3-phenylpropionate hydrocinnamate levels	rs112423294	A	G	0.00782144	-0.402137	0.0883872	7925	5.37163e-06	20.6973
3-phenylpropionate hydrocinnamate levels	rs12929353	A	G	0.00898891	-0.396283	0.0827237	7925	1.6642e-06	22.9454
3-phenylpropionate hydrocinnamate levels	rs148153141	G	A	0.0199163	-0.27871	0.0551887	7925	4.41503e-07	25.5006
3-phenylpropionate hydrocinnamate levels	rs34927101	T	C	0.0178774	0.294909	0.0587005	7925	5.06156e-07	25.237
3-phenylpropionate hydrocinnamate levels	rs62058082	T	C	0.168677	-0.105084	0.0220071	7925	1.7969e-06	22.7978
3-phenylpropionate hydrocinnamate levels	rs112264683	C	T	0.00914634	0.368503	0.0824753	7925	7.89377e-06	19.9609
3-phenylpropionate hydrocinnamate levels	rs10073658	G	A	0.136043	0.104011	0.0231405	7925	6.96524e-06	20.2003
3-phenylpropionate hydrocinnamate levels	rs143985394	G	A	0.0216392	-0.240823	0.0541185	7925	8.59042e-06	19.7993
3-phenylpropionate hydrocinnamate levels	rs4812445	G	A	0.253933	-0.0994662	0.0192108	7925	2.24745e-07	26.8044
Kynurenine levels	rs9988529	C	T	0.042129	-0.180183	0.036929	8244	1.06523e-06	23.8034
Kynurenine levels	rs79435381	A	G	0.0418438	-0.166018	0.0368091	8244	6.4752e-06	20.3398
Kynurenine levels	rs61825638	T	C	0.246402	0.130031	0.0171027	8244	2.89497e-14	57.7979
Kynurenine levels	rs55709807	A	G	0.0356445	0.178987	0.0395664	8244	6.07661e-06	20.4615
Kynurenine levels	rs6440053	A	T	0.842367	0.0964971	0.0204102	8244	2.26858e-06	22.3502
Kynurenine levels	rs9821445	C	T	0.147783	0.0994985	0.0206581	8244	1.46142e-06	23.1953
Kynurenine levels	rs116794445	A	G	0.0110504	-0.322608	0.0709539	8244	5.44861e-06	20.6702
Kynurenine levels	rs10516101	T	C	0.0812102	-0.123617	0.0269608	8244	4.53863e-06	21.0203
Kynurenine levels	rs17240098	T	G	0.0553582	0.148969	0.0327399	8244	5.36261e-06	20.7007
Kynurenine levels	rs17287314	A	T	0.297359	-0.0741746	0.0165025	8244	6.96562e-06	20.2003
Kynurenine levels	rs10216901	T	C	0.372432	-0.092585	0.0153069	8244	1.4614e-09	36.5809
Kynurenine levels	rs55879891	A	C	0.137167	0.101148	0.0215999	8244	2.83001e-06	21.926
Kynurenine levels	rs72761290	A	C	0.0752681	0.135722	0.0286233	8244	2.11975e-06	22.4806
Kynurenine levels	rs6481144	C	A	0.971072	-0.21192	0.0450635	8244	2.56748e-06	22.1127
Kynurenine levels	rs10883982	C	A	0.22765	-0.0787528	0.0174501	8244	6.39098e-06	20.365
Kynurenine levels	rs11055387	C	G	0.0566212	-0.145349	0.0321909	8244	6.32541e-06	20.3847
Kynurenine levels	rs3184504	C	T	0.513669	-0.108142	0.0148104	8244	2.83947e-13	53.3092
Kynurenine levels	rs75973738	A	T	0.0423521	-0.194072	0.0374159	8244	2.13841e-07	26.9005
Kynurenine levels	rs35223481	A	T	0.112435	-0.105966	0.0235442	8244	6.77162e-06	20.2541
Kynurenine levels	rs9933330	T	C	0.180459	-0.103406	0.0193124	8244	8.58377e-08	28.6659
Kynurenine levels	rs72789484	A	G	0.0546991	-0.144555	0.0325854	8244	9.15605e-06	19.6774
Kynurenine levels	rs6540080	A	G	0.287217	-0.107927	0.0164258	8244	5.01151e-11	43.1673
Kynurenine levels	rs4843270	A	C	0.265349	0.205627	0.0165261	8244	1.53431e-35	154.799
Kynurenine levels	rs9909552	G	C	0.37961	0.0692728	0.0155536	8244	8.43552e-06	19.834
Kynurenine levels	rs34519073	A	G	0.311375	0.071803	0.0160729	8244	7.92019e-06	19.9546
N-acetylglutamate levels	rs12070599	A	G	0.31028	-0.0833283	0.0173446	7802	1.55314e-06	23.0781
N-acetylglutamate levels	rs79132971	A	C	0.0725952	0.132736	0.0296366	7802	7.50724e-06	20.057
N-acetylglutamate levels	rs10168931	A	G	0.224014	0.123014	0.0183105	7802	1.83992e-11	45.1287
N-acetylglutamate levels	rs148804382	A	C	0.0103166	0.395956	0.0769657	7802	2.68117e-07	26.4633
N-acetylglutamate levels	rs76105072	C	T	0.0402336	0.178385	0.0390113	7802	4.81571e-06	20.9064
N-acetylglutamate levels	rs186654219	A	G	0.0103212	0.36491	0.0767441	7802	1.98548e-06	22.6061
N-acetylglutamate levels	rs187543759	C	T	0.0110081	-0.329606	0.0734255	7802	7.15653e-06	20.1484
N-acetylglutamate levels	rs10872573	C	T	0.723072	-0.0805091	0.0174765	7802	4.09071e-06	21.219
N-acetylglutamate levels	rs148895950	G	T	0.0133051	-0.297994	0.0670282	7802	8.75659e-06	19.7626
N-acetylglutamate levels	rs10957056	C	A	0.191407	0.087937	0.0197421	7802	8.41709e-06	19.8381
N-acetylglutamate levels	rs116233634	G	A	0.0158761	0.279475	0.0616153	7802	5.73854e-06	20.5709
N-acetylglutamate levels	rs12554315	A	T	0.0556449	0.155318	0.0339765	7802	4.84654e-06	20.8944
N-acetylglutamate levels	rs4336667	A	G	0.567883	-0.0726878	0.0157023	7802	3.67215e-06	21.426
N-acetylglutamate levels	rs2265815	G	A	0.820119	0.0912856	0.0200603	7802	5.35021e-06	20.7049
N-acetylglutamate levels	rs10762589	T	C	0.752636	-0.0883667	0.017702	7802	5.97844e-07	24.9159
N-acetylglutamate levels	rs2803552	C	T	0.96381	-0.205145	0.0419759	7802	1.02278e-06	23.8818
N-acetylglutamate levels	rs60665648	C	T	0.0195022	-0.261085	0.0554528	7802	2.49863e-06	22.1647
N-acetylglutamate levels	rs7154858	C	T	0.155615	0.0944413	0.0212157	7802	8.52813e-06	19.8131
N-acetylglutamate levels	rs28690110	T	C	0.256755	-0.0796679	0.017735	7802	7.05164e-06	20.1766
N-acetylglutamate levels	rs10854172	C	T	0.187765	0.116341	0.01969	7802	3.44954e-09	34.9075
Glycerol 3-phosphate levels	rs72650882	C	T	0.0394383	0.193643	0.0400346	8201	1.31888e-06	23.3927
Glycerol 3-phosphate levels	rs56704741	C	T	0.344183	-0.104833	0.0165102	8201	2.15937e-10	40.3124
Glycerol 3-phosphate levels	rs149344982	A	G	0.0133024	0.321236	0.0677323	8201	2.10864e-06	22.4907
Glycerol 3-phosphate levels	rs1780318	T	A	0.943146	0.448805	0.0333781	8201	3.24475e-41	180.775
Glycerol 3-phosphate levels	rs6695630	G	C	0.12601	-0.110939	0.0235356	8201	2.43304e-06	22.216
Glycerol 3-phosphate levels	rs138201625	C	G	0.0129099	0.330102	0.0688063	8201	1.6062e-06	23.0137
Glycerol 3-phosphate levels	rs16840029	A	G	0.0445551	0.170339	0.0376776	8201	6.15552e-06	20.4366
Glycerol 3-phosphate levels	rs72852030	T	C	0.0168581	0.269297	0.0591747	8201	5.34198e-06	20.708
Glycerol 3-phosphate levels	rs149000340	T	C	0.0174881	-0.283142	0.059454	8201	1.91329e-06	22.6774
Glycerol 3-phosphate levels	rs162416	G	T	0.289002	0.0765529	0.0172667	8201	9.26914e-06	19.654
Glycerol 3-phosphate levels	rs113971921	T	C	0.166028	0.0971709	0.0213914	8201	5.5584e-06	20.632
Glycerol 3-phosphate levels	rs79393239	T	C	0.0279306	-0.213038	0.0470789	8201	6.03565e-06	20.4743
Glycerol 3-phosphate levels	rs337370	T	C	0.519666	-0.0731129	0.0158083	8201	3.74668e-06	21.3877
Glycerol 3-phosphate levels	rs143671553	G	A	0.0235791	-0.236422	0.0500149	8201	2.27834e-06	22.3421
Glycerol 3-phosphate levels	rs118174096	T	C	0.0158449	-0.281275	0.06139	8201	4.6107e-06	20.9901
Glycerol 3-phosphate levels	rs4709324	C	T	0.171541	-0.0959369	0.0210023	8201	4.92582e-06	20.8634
Glycerol 3-phosphate levels	rs6945869	T	C	0.0389125	-0.18358	0.0411328	8201	8.07826e-06	19.9169
Glycerol 3-phosphate levels	rs3750309	G	T	0.455985	0.0779824	0.015705	8201	6.85374e-07	24.6527
Glycerol 3-phosphate levels	rs12770630	T	C	0.12587	-0.115058	0.0235144	8201	9.92606e-07	23.9394
Glycerol 3-phosphate levels	rs118152300	T	G	0.0451781	0.167422	0.0374675	8201	7.87849e-06	19.9647
Glycerol 3-phosphate levels	rs73499488	G	C	0.0231351	0.248377	0.0518527	8201	1.66738e-06	22.9418
Glycerol 3-phosphate levels	rs11603769	C	G	0.0240741	0.229614	0.0511828	8201	7.25222e-06	20.1231
Glycerol 3-phosphate levels	rs117110311	C	G	0.005377	0.488462	0.106255	8201	4.28443e-06	21.1305
Glycerol 3-phosphate levels	rs7968044	C	A	0.140581	-0.0992173	0.022321	8201	8.78797e-06	19.7558
Glycerol 3-phosphate levels	rs75198564	G	A	0.180152	0.0914908	0.0201541	8201	5.63715e-06	20.6051
Glycerol 3-phosphate levels	rs7319463	A	G	0.0285504	-0.217628	0.0465571	8201	2.94778e-06	21.8477
Glycerol 3-phosphate levels	rs10521085	T	C	0.108586	-0.113394	0.0249262	8201	5.38568e-06	20.6926
Glycerol 3-phosphate levels	rs537609697	G	A	0.00853513	-0.424592	0.0873416	8201	1.16631e-06	23.6292
Glycerol 3-phosphate levels	rs74622263	G	A	0.0567904	-0.148881	0.0334532	8201	8.57032e-06	19.8039
Glycerol 3-phosphate levels	rs186366783	A	T	0.0223242	0.2955	0.0524575	8201	1.76967e-08	31.7283
Glycerol 3-phosphate levels	rs186970614	C	G	0.00966006	0.354048	0.07965	8201	8.78718e-06	19.756
Imidazole lactate levels	rs3765719	C	T	0.0864132	0.126601	0.0281066	8256	6.65872e-06	20.2864
Imidazole lactate levels	rs61774831	A	C	0.0119251	0.317674	0.0703736	8256	6.35844e-06	20.3747
Imidazole lactate levels	rs490379	C	A	0.136264	-0.133215	0.0219505	8256	1.28793e-09	36.8269
Imidazole lactate levels	rs7530513	A	G	0.50267	0.397623	0.0144873	8256	7.70378e-166	753.209
Imidazole lactate levels	rs61798917	A	G	0.382142	0.0769112	0.0155656	8256	7.76861e-07	24.4115
Imidazole lactate levels	rs7563086	T	C	0.0697089	0.14342	0.0297498	8256	1.42921e-06	23.238
Imidazole lactate levels	rs9878908	T	C	0.795375	-0.086292	0.0187632	8256	4.24526e-06	21.1483
Imidazole lactate levels	rs150565193	T	C	0.0195122	-0.248798	0.0546598	8256	5.32028e-06	20.716
Imidazole lactate levels	rs116793365	G	A	0.0127972	-0.300561	0.0670653	8256	7.40785e-06	20.0825
Imidazole lactate levels	rs145281230	G	A	0.0105506	-0.439015	0.0738951	8256	2.8318e-09	35.2919
Imidazole lactate levels	rs28410020	C	G	0.255178	0.0844789	0.0176684	8256	1.74121e-06	22.8586
Imidazole lactate levels	rs2315488	A	G	0.220711	-0.0871675	0.0184136	8256	2.20296e-06	22.4068
Imidazole lactate levels	rs72933650	T	C	0.0722807	0.132911	0.0300497	8256	9.73273e-06	19.5609
Imidazole lactate levels	rs72943057	C	T	0.0234716	-0.219653	0.0494957	8256	9.08721e-06	19.6919
Imidazole lactate levels	rs10277377	T	C	0.0950995	0.116516	0.0256952	8256	5.77319e-06	20.5596
Imidazole lactate levels	rs149262976	C	T	0.00729306	0.405513	0.0885376	8256	4.64715e-06	20.975
Imidazole lactate levels	rs1441770	A	G	0.399513	-0.0757838	0.0157461	8256	1.48783e-06	23.1608
Imidazole lactate levels	rs2805103	A	T	0.70863	0.0969957	0.0168381	8256	8.38658e-09	33.1792
Imidazole lactate levels	rs148327605	T	C	0.0658858	0.137958	0.0306471	8256	6.74724e-06	20.2611
Imidazole lactate levels	rs4150575	T	C	0.688358	0.107027	0.0165673	8256	1.04616e-10	41.7283
Imidazole lactate levels	rs10774021	T	C	0.651353	0.194878	0.0158871	8256	1.37213e-34	150.447
Imidazole lactate levels	rs146849590	C	A	0.00444851	-0.504435	0.114153	8256	9.9186e-06	19.5246
Imidazole lactate levels	rs11076256	T	C	0.0774033	0.714384	0.0271182	8256	6.11518e-153	693.888
Imidazole lactate levels	rs143277630	T	C	0.0475578	-0.312217	0.0355437	8256	1.57688e-18	77.1499
Imidazole lactate levels	rs183176218	A	T	0.0392564	-0.173245	0.0390076	8256	8.94059e-06	19.7229
Imidazole lactate levels	rs12601778	T	C	0.434368	-0.107145	0.0153104	8256	2.59273e-12	48.9686
Imidazole lactate levels	rs11672362	T	C	0.0352009	0.184489	0.0415283	8256	8.89242e-06	19.7333
Imidazole lactate levels	rs2229742	C	G	0.0999389	0.116801	0.0254704	8256	4.52323e-06	21.0266
4-guanidinobutanoate levels	rs3737704	C	A	0.55384	-0.450808	0.0141416	8144	1e-200	1016.09
4-guanidinobutanoate levels	rs11260738	A	G	0.508619	-0.0674824	0.014947	8144	6.33838e-06	20.3807
4-guanidinobutanoate levels	rs12145688	G	T	0.404815	0.0783759	0.01516	8144	2.34219e-07	26.7247
4-guanidinobutanoate levels	rs11580678	T	G	0.329111	-0.0749203	0.0161818	8144	3.65841e-06	21.4334
4-guanidinobutanoate levels	rs57389554	A	G	0.0592876	-0.14118	0.0313033	8144	6.48089e-06	20.3382
4-guanidinobutanoate levels	rs114708452	T	C	0.0385138	0.193902	0.039056	8144	6.8796e-07	24.6454
4-guanidinobutanoate levels	rs151040866	A	G	0.0549247	-0.159233	0.0326279	8144	1.05939e-06	23.8141
4-guanidinobutanoate levels	rs13107325	T	C	0.0736144	0.131282	0.0286355	8144	4.54884e-06	21.0159
4-guanidinobutanoate levels	rs6556949	T	C	0.300935	0.0747603	0.0167779	8144	8.35456e-06	19.8524
4-guanidinobutanoate levels	rs7380998	G	A	0.961782	-0.179866	0.0385778	8144	3.12531e-06	21.7355
4-guanidinobutanoate levels	rs13163650	G	A	0.726177	0.0793781	0.0168637	8144	2.51326e-06	22.1535
4-guanidinobutanoate levels	rs61287921	A	G	0.0120779	-0.307334	0.06837	8144	6.95176e-06	20.204
4-guanidinobutanoate levels	rs706151	G	A	0.467889	0.0669338	0.0149986	8144	8.09437e-06	19.913
4-guanidinobutanoate levels	rs150629268	T	G	0.0254143	0.220045	0.0478751	8144	4.30212e-06	21.1227
4-guanidinobutanoate levels	rs140852306	T	C	0.0768229	-0.128618	0.0280679	8144	4.59712e-06	20.9957
4-guanidinobutanoate levels	rs11787780	T	C	0.285195	0.0743765	0.0165161	8144	6.69172e-06	20.277
4-guanidinobutanoate levels	rs72632963	C	T	0.0149686	-0.272225	0.0611352	8144	8.47468e-06	19.8253
4-guanidinobutanoate levels	rs7969761	T	C	0.545855	0.0903542	0.0151665	8144	2.56147e-09	35.4873
4-guanidinobutanoate levels	rs61991622	A	G	0.0647691	0.139752	0.0309457	8144	6.30045e-06	20.3921
4-guanidinobutanoate levels	rs45622433	A	G	0.00786531	-0.392152	0.0846735	8144	3.63311e-06	21.4467
4-guanidinobutanoate levels	rs112807038	T	C	0.0345951	0.185925	0.0407482	8144	5.04797e-06	20.8164
4-guanidinobutanoate levels	rs77951681	C	T	0.138948	0.101923	0.021744	8144	2.76668e-06	21.9691
Glucuronate levels	rs12092559	T	G	0.118985	-0.106219	0.0234488	7988	5.9031e-06	20.5168
Glucuronate levels	rs111273747	G	A	0.010158	0.349979	0.0761519	7988	4.31095e-06	21.1187
Glucuronate levels	rs140946796	G	T	0.00899371	0.373006	0.0808908	7988	4.00306e-06	21.2608
Glucuronate levels	rs1561398	T	C	0.252229	-0.0832245	0.0178383	7988	3.07873e-06	21.7641
Glucuronate levels	rs62391856	T	C	0.215529	0.0882028	0.0192251	7988	4.47738e-06	21.0462
Glucuronate levels	rs9491556	T	C	0.00679673	0.419107	0.0935382	7988	7.44346e-06	20.0732
Glucuronate levels	rs117910752	G	A	0.0415035	0.185814	0.0381401	7988	1.10542e-06	23.7322
Glucuronate levels	rs141615044	A	C	0.010653	0.336958	0.0744002	7988	5.92643e-06	20.5092
Glucuronate levels	rs10898981	C	A	0.678023	0.0773381	0.0164678	7988	2.64893e-06	22.0527
Glucuronate levels	rs189957470	T	C	0.0160574	-0.288782	0.0611897	7988	2.36482e-06	22.2705
Glucuronate levels	rs6539427	C	T	0.220234	-0.0846334	0.0184289	7988	4.38124e-06	21.0878
Glucuronate levels	rs1959120	T	A	0.426814	-0.071683	0.0156366	7988	4.55502e-06	21.0133
Glucuronate levels	rs12050756	G	A	0.0314485	0.199795	0.0437976	7988	5.07208e-06	20.8072
Glucuronate levels	rs150551895	T	C	0.0176136	0.264587	0.0586271	7988	6.39044e-06	20.3651
Glucuronate levels	rs7510321	C	T	0.771942	0.0811601	0.0183015	7988	9.22398e-06	19.6633
Glucuronate levels	rs73231674	G	T	0.0645404	-0.140286	0.031236	7988	7.08371e-06	20.168
Glucuronate levels	rs116932970	C	A	0.042454	0.16785	0.0379049	7988	9.50326e-06	19.6064
Ribitol levels	rs3845611	G	T	0.13437	-0.104901	0.0226947	8128	3.79543e-06	21.3627
Ribitol levels	rs2744764	T	C	0.0960564	0.117358	0.0259235	8128	5.98024e-06	20.492
Ribitol levels	rs72688441	A	G	0.0538338	-0.603321	0.0335227	8128	2.04224e-72	323.866
Ribitol levels	rs12144476	C	T	0.0264037	0.222626	0.0482583	8128	3.96485e-06	21.2792
Ribitol levels	rs74995512	A	G	0.0113902	-0.331117	0.0720991	8128	4.37895e-06	21.0887
Ribitol levels	rs13100424	G	C	0.0200999	0.294562	0.0550166	8128	8.60081e-08	28.6624
Ribitol levels	rs1420467	A	G	0.792493	0.0920482	0.0191097	8128	1.45859e-06	23.199
Ribitol levels	rs73248229	G	T	0.0358819	-0.190145	0.0417423	8128	5.23327e-06	20.7474
Ribitol levels	rs115232717	G	A	0.0059106	-0.516457	0.0995462	8128	2.12436e-07	26.9132
Ribitol levels	rs111534509	A	G	0.0533091	0.157601	0.034992	8128	6.67078e-06	20.2828
Ribitol levels	rs186730428	G	A	0.377822	-0.0721017	0.0158572	8128	5.44296e-06	20.6721
Ribitol levels	rs144424724	T	C	0.0110974	-0.331572	0.0738799	8128	7.18982e-06	20.1395
Ribitol levels	rs80012250	G	A	0.0478994	-0.164302	0.0363521	8128	6.19202e-06	20.4255
Ribitol levels	rs60688348	C	A	0.263264	0.0788168	0.0175391	8128	6.99747e-06	20.1915
Ribitol levels	rs77703857	T	C	0.0350223	0.191571	0.0432535	8128	9.46597e-06	19.6139
Ribitol levels	rs73217598	A	G	0.0144704	0.307856	0.0648737	8128	2.08033e-06	22.5167
Ribitol levels	rs113682909	C	G	0.00939639	-0.405067	0.0804974	8128	4.85273e-07	25.3184
Ribitol levels	rs2186050	C	G	0.355675	-0.0781457	0.0165737	8128	2.41664e-06	22.2289
Ribitol levels	rs142220999	T	C	0.0109313	0.334271	0.0744908	8128	7.20911e-06	20.1344
Ribitol levels	rs7903429	T	C	0.170385	0.0970626	0.0205295	8128	2.268e-06	22.3508
Ribitol levels	rs117587050	C	T	0.015144	0.301156	0.0631777	8128	1.87162e-06	22.7197
Ribitol levels	rs77987208	C	T	0.132946	-0.117677	0.0227397	8128	2.27943e-07	26.7769
Ribitol levels	rs572823378	A	C	0.0173521	-0.268394	0.0590763	8128	5.54148e-06	20.6379
Ribitol levels	rs73317157	A	G	0.0875741	-0.122647	0.0273357	8128	7.23375e-06	20.128
Ribitol levels	rs183901354	T	C	0.00166482	-0.901248	0.188913	8128	1.83581e-06	22.7568
Ribitol levels	rs192431765	C	G	0.00788428	0.406925	0.0876599	8128	3.44911e-06	21.5463
Ribitol levels	rs145095548	C	A	0.00468731	0.524916	0.112951	8128	3.363e-06	21.5946
Ribitol levels	rs72722075	T	C	0.123722	-0.141262	0.0235479	8128	1.98631e-09	35.9826
Ribitol levels	rs7190382	T	A	0.643304	-0.0809751	0.0163858	8128	7.74104e-07	24.4182
Ribitol levels	rs34552467	C	A	0.329207	0.0748839	0.0166187	8128	6.60635e-06	20.3016
Ribitol levels	rs62058095	C	G	0.00930835	-0.355229	0.07998	8128	8.93446e-06	19.7243
Ribitol levels	rs12967772	T	C	0.885377	0.114477	0.0245399	8128	3.08744e-06	21.7589
Ribitol levels	rs7252227	T	G	0.581229	-0.0705068	0.0155659	8128	5.90998e-06	20.5145
Ribitol levels	rs12625462	A	G	0.141742	0.100419	0.0222218	8128	6.21488e-06	20.4183
Ribitol levels	rs13046014	C	G	0.0710291	0.143955	0.0298658	8128	1.43512e-06	23.2301
Ribitol levels	rs111422112	C	T	0.010822	0.342769	0.075336	8128	5.36802e-06	20.6988
Ribitol levels	rs117035597	A	C	0.0453645	-0.164258	0.0368759	8128	8.41487e-06	19.8388
Glycodeoxycholate levels	rs146174820	A	G	0.0197154	-0.286214	0.0611534	6877	2.86509e-06	21.9017
Glycodeoxycholate levels	rs2290258	C	A	0.106372	0.124683	0.0274227	6877	5.44905e-06	20.6695
Glycodeoxycholate levels	rs3132031	C	G	0.083724	0.136212	0.0306465	6877	8.80501e-06	19.7518
Glycodeoxycholate levels	rs73153108	T	C	0.027794	0.230561	0.0515713	6877	7.7958e-06	19.9845
Glycodeoxycholate levels	rs60930884	G	T	0.0979532	-0.127602	0.028606	6877	8.16974e-06	19.8947
Glycodeoxycholate levels	rs115480587	G	A	0.024909	-0.243568	0.0535613	6877	5.42975e-06	20.6764
Glycodeoxycholate levels	rs13101279	A	G	0.608785	0.0770005	0.0172893	6877	8.44267e-06	19.8321
Glycodeoxycholate levels	rs7687207	G	A	0.548944	0.0783161	0.0172861	6877	5.88215e-06	20.5232
Glycodeoxycholate levels	rs55917677	T	C	0.234824	0.0908851	0.0199131	6877	5.01701e-06	20.8279
Glycodeoxycholate levels	rs80078071	A	G	0.191709	0.0973519	0.0216891	6877	7.17216e-06	20.1439
Glycodeoxycholate levels	rs62448268	A	G	0.206154	0.0953227	0.0205955	6877	3.68649e-06	21.4183
Glycodeoxycholate levels	rs76962381	T	C	0.207403	-0.10889	0.0207547	6877	1.55001e-07	27.522
Glycodeoxycholate levels	rs75878687	C	G	0.0193798	0.274662	0.0617298	6877	8.61017e-06	19.7945
Glycodeoxycholate levels	rs74927400	T	C	0.0157956	0.330046	0.0678883	6877	1.16438e-06	23.6318
Glycodeoxycholate levels	rs2155345	T	G	0.318609	-0.0810837	0.0182146	6877	8.52414e-06	19.8137
Glycodeoxycholate levels	rs9514591	C	T	0.299417	-0.0820086	0.0184498	6877	8.79046e-06	19.7548
Glycodeoxycholate levels	rs2351511	T	C	0.985905	0.322661	0.0724084	6877	8.3451e-06	19.8542
Glycodeoxycholate levels	rs7403557	G	A	0.731422	0.101229	0.019175	6877	1.29754e-07	27.8661
Glycodeoxycholate levels	rs115155467	G	A	0.00815257	-0.460446	0.0942028	6877	1.0196e-06	23.8873
Glycodeoxycholate levels	rs118040844	A	T	0.00810253	0.429065	0.0950748	6877	6.39414e-06	20.3635
Theobromine levels	rs6669746	A	G	0.483722	0.0701676	0.0154489	8137	5.57445e-06	20.6265
Theobromine levels	rs2628473	C	G	0.306775	0.0753681	0.0169935	8137	9.20294e-06	19.6678
Theobromine levels	rs115810418	T	A	0.0458835	0.173537	0.0370651	8137	2.84155e-06	21.918
Theobromine levels	rs72870405	A	T	0.0614672	-0.15323	0.0326215	8137	2.63736e-06	22.0611
Theobromine levels	rs35155698	C	T	0.300798	0.0750576	0.0169732	8137	9.77406e-06	19.5528
Theobromine levels	rs13065149	T	G	0.416893	-0.0774221	0.0160933	8137	1.50311e-06	23.1412
Theobromine levels	rs79880362	T	C	0.0745231	0.146943	0.0295016	8137	6.33111e-07	24.8058
Theobromine levels	rs6878843	T	G	0.0981603	0.11814	0.0259449	8137	5.27622e-06	20.7318
Theobromine levels	rs116892987	A	G	0.0122552	-0.329003	0.0711461	8137	3.758e-06	21.3818
Theobromine levels	rs6569661	G	A	0.726404	-0.0859588	0.0178126	8137	1.39498e-06	23.2848
Theobromine levels	rs62462718	A	G	0.317824	-0.0777005	0.0173769	8137	7.76761e-06	19.9917
Theobromine levels	rs2529273	T	C	0.726808	0.101541	0.0178971	8137	1.39856e-08	32.1858
Theobromine levels	rs12549440	T	C	0.34769	0.0794261	0.0165038	8137	1.48987e-06	23.1582
Theobromine levels	rs117966480	C	A	0.0145231	-0.322677	0.0654721	8137	8.28759e-07	24.2868
Theobromine levels	rs144661998	A	G	0.159529	0.0958879	0.0213092	8137	6.80036e-06	20.246
Theobromine levels	rs147824813	G	T	0.0136067	0.298848	0.0673004	8137	8.9747e-06	19.7157
Theobromine levels	rs7485735	C	T	0.686925	-0.0794824	0.0175283	8137	5.77336e-06	20.5593
Theobromine levels	rs12431055	T	C	0.0798941	0.128412	0.0287893	8137	8.17999e-06	19.8928
Theobromine levels	rs150576152	G	A	0.0301517	0.207064	0.0456525	8137	5.7426e-06	20.5696
Theobromine levels	rs566861268	A	G	0.00457129	0.519125	0.115771	8137	7.3239e-06	20.1044
Theobromine levels	rs6497692	T	C	0.431385	0.0748062	0.0156289	8137	1.69789e-06	22.9068
Theobromine levels	rs11657948	A	G	0.0951605	0.119169	0.026931	8137	9.6448e-06	19.578
Theobromine levels	rs11653172	G	A	0.507309	-0.0719812	0.0161773	8137	8.6063e-06	19.7958
Theobromine levels	rs56113850	C	T	0.576193	-0.105914	0.0155754	8137	1.04562e-11	46.2354
Theobromine levels	rs62205691	A	G	0.0153181	-0.282897	0.0634126	8137	8.15002e-06	19.9
Theobromine levels	rs139776	T	C	0.332129	-0.0834689	0.0169698	8137	8.7129e-07	24.1904
Theobromine levels	rs113666924	A	G	0.0343297	-0.199128	0.043086	8137	3.80707e-06	21.3569
Quinate levels	rs553719	C	T	0.937921	0.147306	0.0328968	8200	7.54079e-06	20.0484
Quinate levels	rs114371828	T	C	0.0166605	-0.267108	0.0601557	8200	8.98427e-06	19.7137
Quinate levels	rs1594297	A	G	0.974516	0.224925	0.0505211	8200	8.50366e-06	19.8188
Quinate levels	rs116020639	C	T	0.0157528	-0.316022	0.0623683	8200	4.04057e-07	25.6717
Quinate levels	rs112388569	T	C	0.0132667	-0.298781	0.0671713	8200	8.66557e-06	19.7827
Quinate levels	rs140759816	A	T	0.0375843	-0.186302	0.0405924	8200	4.44137e-06	21.0617
Quinate levels	rs34099891	T	G	0.26108	-0.0824109	0.0174244	8200	2.24925e-06	22.3666
Quinate levels	rs74489311	A	T	0.00103899	-1.12714	0.240369	8200	2.74252e-06	21.986
Quinate levels	rs77082173	T	C	0.030454	0.201076	0.0453441	8200	9.23095e-06	19.6619
Quinate levels	rs4148714	C	A	0.0913027	-0.125867	0.027082	8200	3.35762e-06	21.5978
Quinate levels	rs73202647	C	T	0.121515	-0.109072	0.0238233	8200	4.68646e-06	20.959
Quinate levels	rs73328382	A	C	0.00586941	-0.490215	0.101636	8200	1.41227e-06	23.2608
Quinate levels	rs186185553	T	C	0.0190144	-0.255397	0.0568661	8200	7.08223e-06	20.1684
Quinate levels	rs115520044	A	G	0.0166095	0.330168	0.0606751	8200	5.28093e-08	29.6071
Quinate levels	rs62027288	C	T	0.460441	0.0759955	0.0156247	8200	1.15144e-06	23.6537
Quinate levels	rs183574340	A	G	0.00850881	-0.415375	0.0834702	8200	6.48022e-07	24.7608
Quinate levels	rs2108740	A	C	0.0446539	-0.169235	0.0373631	8200	5.91354e-06	20.5136
Quinate levels	rs145444661	T	C	0.0131884	-0.329336	0.0679412	8200	1.25107e-06	23.4941
Quinate levels	rs76051019	A	G	0.0258336	-0.23203	0.0487058	8200	1.89885e-06	22.6921
Quinate levels	rs5997787	C	T	0.55684	0.0735554	0.0159581	8200	4.04072e-06	21.2429
Gentisate levels	rs3861695	T	C	0.683305	-0.0760413	0.0169127	8013	6.92059e-06	20.2125
Gentisate levels	rs522708	G	A	0.283475	-0.0822705	0.0169917	8013	1.28672e-06	23.4402
Gentisate levels	rs187258635	T	C	0.0215081	-0.236251	0.0532573	8013	9.16358e-06	19.6759
Gentisate levels	rs72824920	C	T	0.0442895	0.192917	0.0371937	8013	2.13916e-07	26.8997
Gentisate levels	rs12471344	A	G	0.0351109	-0.204526	0.0425454	8013	1.53017e-06	23.1067
Gentisate levels	rs72950259	G	T	0.00712767	0.409958	0.0917044	8013	7.80613e-06	19.9822
Gentisate levels	rs77380220	A	G	0.0258828	0.222387	0.0486142	8013	4.77297e-06	20.9237
Gentisate levels	rs73217253	A	G	0.0584083	-0.160981	0.0328036	8013	9.2284e-07	24.0798
Gentisate levels	rs147503040	A	G	0.0254653	0.240882	0.0486921	8013	7.53505e-07	24.4702
Gentisate levels	rs79188489	T	G	0.0106531	0.343904	0.0751315	8013	4.70886e-06	20.9496
Gentisate levels	rs62362979	G	A	0.0161857	0.273101	0.0610391	8013	7.66985e-06	20.0159
Gentisate levels	rs62621664	T	G	0.0182409	0.265359	0.0575444	8013	4.00005e-06	21.2622
Gentisate levels	rs375709482	T	C	0.0191874	-0.273576	0.0557177	8013	9.10581e-07	24.1055
Gentisate levels	rs10097464	C	T	0.441401	-0.0715199	0.015626	8013	4.71698e-06	20.9461
Gentisate levels	rs1041350	C	T	0.162725	0.0994006	0.0208627	8013	1.8932e-06	22.6977
Gentisate levels	rs1010664	C	T	0.0324447	0.200004	0.0431905	8013	3.64356e-06	21.4411
Gentisate levels	rs77091748	T	C	0.0181761	0.25787	0.0580381	8013	8.86671e-06	19.7388
Gentisate levels	rs76930336	A	C	0.0324797	-0.202699	0.0432874	8013	2.83225e-06	21.9243
Gentisate levels	rs113812650	T	C	0.00708375	-0.420894	0.0921	8013	4.87808e-06	20.882
Gentisate levels	rs9572022	G	A	0.568464	-0.0758655	0.0155994	8013	1.154e-06	23.6493
Gentisate levels	rs117167763	T	C	0.00338685	0.594305	0.13274	8013	7.56251e-06	20.0429
Gentisate levels	rs72645867	A	G	0.0602902	0.162441	0.0331451	8013	9.53955e-07	24.0159
Gentisate levels	rs75476920	C	T	0.15625	-0.0942693	0.0212045	8013	8.75949e-06	19.762
Gentisate levels	rs9959080	A	G	0.807333	-0.0926697	0.0194371	8013	1.86358e-06	22.7279
Gentisate levels	rs10153505	G	T	0.854558	-0.109387	0.02296	8013	1.89575e-06	22.6952
Gentisate levels	rs367715	G	A	0.348675	0.0721685	0.0160673	8013	7.0676e-06	20.1723
Gentisate levels	rs2833465	T	C	0.12614	-0.110209	0.023061	8013	1.76156e-06	22.8362
Gentisate levels	rs6010005	C	G	0.0237352	0.229928	0.05	8013	4.25419e-06	21.1441
Theophylline levels	rs10902695	T	C	0.274212	-0.0834655	0.018084	7822	3.9229e-06	21.2995
Theophylline levels	rs72793907	G	A	0.0174664	-0.274555	0.0606691	7822	6.02668e-06	20.4771
Theophylline levels	rs1388182	T	C	0.0561395	-0.155876	0.0349153	7822	8.02918e-06	19.9284
Theophylline levels	rs114110478	C	G	0.0759902	0.142487	0.0303158	7822	2.60048e-06	22.088
Theophylline levels	rs75723819	A	C	0.0308404	-0.211336	0.0468234	7822	6.37754e-06	20.3688
Theophylline levels	rs75870478	T	C	0.0183091	-0.281468	0.0600974	7822	2.81969e-06	21.9327
Theophylline levels	rs67360043	A	T	0.210393	0.0886627	0.0196537	7822	6.44475e-06	20.3487
Theophylline levels	rs258831	G	C	0.172656	-0.0982197	0.0220943	7822	8.76968e-06	19.7597
Theophylline levels	rs116926604	C	T	0.0187757	-0.276332	0.0591917	7822	3.03525e-06	21.7914
Theophylline levels	rs79361921	A	G	0.0295007	-0.232926	0.0470132	7822	7.25218e-07	24.5437
Theophylline levels	rs17428030	G	A	0.0811424	0.136372	0.0301283	7822	5.99992e-06	20.4855
Theophylline levels	rs12259905	T	C	0.0731332	0.155223	0.0305894	7822	3.88709e-07	25.7463
Theophylline levels	rs4615950	T	C	0.399028	-0.0738501	0.0164924	7822	7.54096e-06	20.0484
Theophylline levels	rs34804482	C	T	0.0234865	-0.242551	0.0527985	7822	4.35018e-06	21.1012
Theophylline levels	rs643104	C	T	0.336783	-0.0815481	0.017458	7822	2.99589e-06	21.8164
Theophylline levels	rs74069834	G	A	0.0173385	-0.270594	0.0611119	7822	9.51795e-06	19.6033
Theophylline levels	rs7323950	G	A	0.669651	-0.0792948	0.0174912	7822	5.80379e-06	20.5492
Theophylline levels	rs116572946	T	C	0.0176742	-0.278367	0.060805	7822	4.694e-06	20.9557
Theophylline levels	rs79542551	G	A	0.0127102	-0.328871	0.0716904	7822	4.48836e-06	21.0414
Theophylline levels	rs115520044	A	G	0.016898	0.322722	0.0619626	7822	1.90536e-07	27.1233
Theophylline levels	rs75095637	C	A	0.0721271	0.140865	0.0309814	7822	5.44768e-06	20.6704
Theophylline levels	rs180968112	A	G	0.0133062	-0.313019	0.0708522	7822	9.96551e-06	19.5155
Theophylline levels	rs74526939	G	A	0.0338003	-0.20014	0.0441667	7822	5.85782e-06	20.5316
Theophylline levels	rs149370966	A	G	0.0180128	-0.270438	0.0600696	7822	6.72911e-06	20.2661
Theophylline levels	rs2245730	C	A	0.435058	-0.0787472	0.0162537	7822	1.26685e-06	23.4698
1,5-anhydroglucitol (1,5-ag) levels	rs526600	A	T	0.980668	-0.303655	0.0557783	8139	5.21094e-08	29.6331
1,5-anhydroglucitol (1,5-ag) levels	rs7536190	A	T	0.886879	0.113912	0.0241326	8139	2.35583e-06	22.2781
1,5-anhydroglucitol (1,5-ag) levels	rs2800798	A	G	0.245431	0.079919	0.0176597	8139	6.02526e-06	20.4776
1,5-anhydroglucitol (1,5-ag) levels	rs28429046	T	A	0.218221	0.0877134	0.0190478	8139	4.12664e-06	21.2026
1,5-anhydroglucitol (1,5-ag) levels	rs219151	C	G	0.803761	-0.0930985	0.0192478	8139	1.31914e-06	23.3921
1,5-anhydroglucitol (1,5-ag) levels	rs139280007	C	G	0.0208697	-0.241187	0.0534709	8139	6.46361e-06	20.3432
1,5-anhydroglucitol (1,5-ag) levels	rs4988235	A	G	0.646606	0.125118	0.015516	8139	7.39543e-16	65.017
1,5-anhydroglucitol (1,5-ag) levels	rs138882034	C	T	0.00797971	-0.40062	0.0847491	8139	2.27723e-06	22.343
1,5-anhydroglucitol (1,5-ag) levels	rs147071339	G	A	0.0024003	-0.72443	0.15567	8139	3.26144e-06	21.6536
1,5-anhydroglucitol (1,5-ag) levels	rs6444144	T	C	0.601673	0.0750138	0.0155373	8139	1.37932e-06	23.3065
1,5-anhydroglucitol (1,5-ag) levels	rs5026374	A	T	0.580627	0.0705329	0.0155202	8139	5.50414e-06	20.6507
1,5-anhydroglucitol (1,5-ag) levels	rs112766573	T	C	0.055333	0.149694	0.033745	8139	9.16336e-06	19.676
1,5-anhydroglucitol (1,5-ag) levels	rs78394231	C	T	0.0970646	0.116636	0.0258071	8139	6.19749e-06	20.4237
1,5-anhydroglucitol (1,5-ag) levels	rs118097969	A	C	0.0178351	0.254382	0.0574857	8139	9.63851e-06	19.5794
1,5-anhydroglucitol (1,5-ag) levels	rs185053832	A	C	0.00916021	-0.376359	0.0796429	8139	2.29459e-06	22.3284
1,5-anhydroglucitol (1,5-ag) levels	rs11976181	C	T	0.817748	-0.132448	0.0208369	8139	2.06534e-10	40.3991
1,5-anhydroglucitol (1,5-ag) levels	rs55646821	A	C	0.936148	0.150169	0.0310105	8139	1.28209e-06	23.4471
1,5-anhydroglucitol (1,5-ag) levels	rs868427	C	T	0.130862	-0.103914	0.0229285	8139	5.83995e-06	20.5373
1,5-anhydroglucitol (1,5-ag) levels	rs138306161	T	C	0.0122087	-0.308695	0.069429	8139	8.74061e-06	19.7662
1,5-anhydroglucitol (1,5-ag) levels	rs117813792	G	A	0.0136799	-0.331071	0.0662852	8139	5.89455e-07	24.9434
1,5-anhydroglucitol (1,5-ag) levels	rs111517692	A	G	0.0399656	0.186098	0.0389448	8139	1.76596e-06	22.8313
1,5-anhydroglucitol (1,5-ag) levels	rs16923778	T	C	0.0114964	-0.364422	0.0717318	8139	3.76743e-07	25.8067
1,5-anhydroglucitol (1,5-ag) levels	rs16936434	A	G	0.0583838	-0.144243	0.0325739	8139	9.50335e-06	19.6063
1,5-anhydroglucitol (1,5-ag) levels	rs11219784	C	T	0.0145213	-0.29621	0.0635149	8139	3.10664e-06	21.7468
1,5-anhydroglucitol (1,5-ag) levels	rs72670617	G	T	0.120487	-0.109981	0.0239503	8139	4.38952e-06	21.0843
1,5-anhydroglucitol (1,5-ag) levels	rs116855721	A	G	0.0228932	0.235097	0.0504828	8139	3.20903e-06	21.6847
1,5-anhydroglucitol (1,5-ag) levels	rs10152997	C	T	0.552011	-0.0762043	0.0152829	8139	6.15686e-07	24.8596
1,5-anhydroglucitol (1,5-ag) levels	rs34278530	C	T	0.16675	0.0966945	0.020462	8139	2.29468e-06	22.3282
1,5-anhydroglucitol (1,5-ag) levels	rs77283946	A	C	0.0189905	-0.552741	0.0562598	8139	8.80516e-23	96.5147
1,5-anhydroglucitol (1,5-ag) levels	rs116139938	T	G	0.0309995	-0.267495	0.0444913	8139	1.82908e-09	36.1433
1,5-anhydroglucitol (1,5-ag) levels	rs2638281	G	A	0.588573	0.0758197	0.015228	8139	6.39246e-07	24.7871
1,5-anhydroglucitol (1,5-ag) levels	rs190533843	G	A	0.00831678	-0.402017	0.0838446	8139	1.62846e-06	22.9872
1,5-anhydroglucitol (1,5-ag) levels	rs11912766	A	G	0.000123047	-3.06436	0.685923	8139	7.91384e-06	19.9561
1-stearoyl-2-arachidonoyl-GPI (18:0/20:4) levels	rs11121795	T	C	0.0377603	-0.178874	0.0395199	8134	6.00641e-06	20.4837
1-stearoyl-2-arachidonoyl-GPI (18:0/20:4) levels	rs112957492	C	T	0.338891	-0.195795	0.0157253	8134	1.38202e-35	155.007
1-stearoyl-2-arachidonoyl-GPI (18:0/20:4) levels	rs74988287	C	T	0.0099395	-0.366432	0.0770971	8134	2.00554e-06	22.5869
1-stearoyl-2-arachidonoyl-GPI (18:0/20:4) levels	rs10188669	A	G	0.51141	-0.0671657	0.0151226	8134	8.93665e-06	19.7237
1-stearoyl-2-arachidonoyl-GPI (18:0/20:4) levels	rs115307528	G	A	0.0131579	-0.299834	0.0666202	8134	6.77474e-06	20.2533
1-stearoyl-2-arachidonoyl-GPI (18:0/20:4) levels	rs2712421	T	G	0.655887	0.0732419	0.0160311	8134	4.90664e-06	20.8708
1-stearoyl-2-arachidonoyl-GPI (18:0/20:4) levels	rs400810	G	A	0.0862856	0.128883	0.0270407	8134	1.8767e-06	22.7144
1-stearoyl-2-arachidonoyl-GPI (18:0/20:4) levels	rs34542491	T	C	0.175664	0.0896599	0.0199692	8134	7.12545e-06	20.1568
1-stearoyl-2-arachidonoyl-GPI (18:0/20:4) levels	rs140033739	A	G	0.0496511	-0.166275	0.0351807	8134	2.28641e-06	22.3353
1-stearoyl-2-arachidonoyl-GPI (18:0/20:4) levels	rs3812316	G	C	0.121888	-0.136926	0.023095	8134	3.05078e-09	35.1465
1-stearoyl-2-arachidonoyl-GPI (18:0/20:4) levels	rs60417901	T	C	0.0227329	-0.226606	0.051098	8134	9.21865e-06	19.6644
1-stearoyl-2-arachidonoyl-GPI (18:0/20:4) levels	rs141701630	T	C	0.012135	0.317893	0.0698624	8134	5.3575e-06	20.7024
1-stearoyl-2-arachidonoyl-GPI (18:0/20:4) levels	rs72697217	C	G	0.0714189	0.139809	0.031174	8134	7.29826e-06	20.1109
1-stearoyl-2-arachidonoyl-GPI (18:0/20:4) levels	rs174560	C	T	0.306967	-0.263536	0.0162451	8134	3.49778e-59	263.137
1-stearoyl-2-arachidonoyl-GPI (18:0/20:4) levels	rs964184	C	G	0.868833	-0.194744	0.0224871	8134	4.70771e-18	74.9908
1-stearoyl-2-arachidonoyl-GPI (18:0/20:4) levels	rs2269938	G	C	0.166874	-0.104296	0.0203216	8134	2.86272e-07	26.337
1-stearoyl-2-arachidonoyl-GPI (18:0/20:4) levels	rs112843621	G	A	0.0095679	-0.366363	0.0780364	8134	2.66903e-06	22.0382
1-stearoyl-2-arachidonoyl-GPI (18:0/20:4) levels	rs80195574	A	G	0.0272033	-0.221346	0.0471492	8134	2.67135e-06	22.0364
1-stearoyl-2-arachidonoyl-GPI (18:0/20:4) levels	rs1532085	G	A	0.623614	-0.0917612	0.0157522	8134	5.70113e-09	33.9299
1-stearoyl-2-arachidonoyl-GPI (18:0/20:4) levels	rs79608464	A	G	0.01871	0.25749	0.0562381	8134	4.68177e-06	20.9607
1-stearoyl-2-arachidonoyl-GPI (18:0/20:4) levels	rs77960347	G	A	0.0143349	0.479876	0.0634052	8134	3.77862e-14	57.2737
1-stearoyl-2-arachidonoyl-GPI (18:0/20:4) levels	rs7241918	T	G	0.826708	0.132894	0.0200029	8134	3.05834e-11	44.1338
1-stearoyl-2-arachidonoyl-GPI (18:0/20:4) levels	rs66466742	T	C	0.0402441	-0.189746	0.0383851	8134	7.68393e-07	24.4324
1-stearoyl-2-arachidonoyl-GPI (18:0/20:4) levels	rs157595	G	A	0.599898	0.0939248	0.0158609	8134	3.18487e-09	35.0632
1-stearoyl-2-arachidonoyl-GPI (18:0/20:4) levels	rs626283	G	C	0.562667	0.174476	0.0155831	8134	4.2426e-29	125.346
Indolelactate levels	rs34380016	G	A	0.437266	-0.0666468	0.0146285	8233	5.21484e-06	20.7542
Indolelactate levels	rs190002061	A	G	0.0150532	-0.265524	0.058646	8233	5.9667e-06	20.4964
Indolelactate levels	rs62154332	T	C	0.0765673	0.118683	0.0265768	8233	7.98229e-06	19.9397
Indolelactate levels	rs7617388	G	A	0.857589	-0.0945532	0.0213736	8233	9.69652e-06	19.5679
Indolelactate levels	rs185272650	T	C	0.0112236	-0.300455	0.067736	8233	9.1782e-06	19.6728
Indolelactate levels	rs1354368	G	A	0.64522	-0.072441	0.0148179	8233	1.01477e-06	23.897
Indolelactate levels	rs11950935	C	T	0.194657	-0.0798371	0.0178954	8233	8.14575e-06	19.901
Indolelactate levels	rs73782967	A	G	0.0546588	-0.152997	0.0316953	8233	1.38514e-06	23.2983
Indolelactate levels	rs1867457	C	T	0.111679	-0.102015	0.0229082	8233	8.45953e-06	19.8287
Indolelactate levels	rs113392484	C	T	0.0109306	0.318007	0.0686372	8233	3.60129e-06	21.4635
Indolelactate levels	rs117078442	A	G	0.024059	-0.209946	0.046984	8233	7.87867e-06	19.9647
Indolelactate levels	rs145909629	A	G	0.0147347	0.321487	0.0589415	8233	4.91562e-08	29.7462
Indolelactate levels	rs2472509	G	T	0.326865	0.07003	0.0152695	8233	4.51219e-06	21.0313
Indolelactate levels	rs2997922	T	C	0.709362	0.185074	0.0156931	8233	4.22481e-32	139.066
Indolelactate levels	rs142582686	T	G	0.0429166	0.164806	0.0355849	8233	3.63318e-06	21.4468
Indolelactate levels	rs11598287	A	G	0.30454	0.0749453	0.0160157	8233	2.87603e-06	21.895
Indolelactate levels	rs75333405	C	T	0.0356968	-0.170317	0.0384177	8233	9.28037e-06	19.6517
Indolelactate levels	rs2794660	T	C	0.140026	0.0949183	0.0213333	8233	8.61484e-06	19.7939
Indolelactate levels	rs61674325	T	C	0.329491	-0.0679091	0.0151389	8233	7.26587e-06	20.1194
Indolelactate levels	rs1255731	C	T	0.236978	-0.0753124	0.0168771	8233	8.10475e-06	19.9106
Indolelactate levels	rs148403098	T	C	0.0411829	0.167538	0.0359224	8233	3.10312e-06	21.7492
Indolelactate levels	rs139117506	C	A	0.0370029	-0.175748	0.0379139	8233	3.56131e-06	21.4848
Indolelactate levels	rs11647808	A	C	0.0790114	0.212473	0.0262875	8233	6.33765e-16	65.3215
Indolelactate levels	rs35021400	A	C	0.214409	-0.0820587	0.0174559	8233	2.58998e-06	22.0959
Indolelactate levels	rs142009207	C	G	0.0765238	-0.118055	0.0266692	8233	9.57138e-06	19.5928
Indolelactate levels	rs150393758	T	C	0.0355126	0.172921	0.0390292	8233	9.39877e-06	19.6274
Indolelactate levels	rs19009	C	T	0.428307	-0.0637423	0.0143515	8233	8.9327e-06	19.7246
Docosahexaenoate DHA; 22:6n3 levels	rs12129379	T	G	0.17895	0.0929219	0.0196733	8279	2.32117e-06	22.3064
Docosahexaenoate DHA; 22:6n3 levels	rs181031465	T	C	0.0138364	0.282577	0.0630184	8279	7.32432e-06	20.1042
Docosahexaenoate DHA; 22:6n3 levels	rs3731644	C	T	0.100677	0.110271	0.0242799	8279	5.58135e-06	20.6242
Docosahexaenoate DHA; 22:6n3 levels	rs11715464	G	A	0.380725	-0.068416	0.0152901	8279	7.65771e-06	20.019
Docosahexaenoate DHA; 22:6n3 levels	rs11709701	T	C	0.315498	0.0724482	0.0158802	8279	5.06262e-06	20.8109
Docosahexaenoate DHA; 22:6n3 levels	rs11930628	G	A	0.0880354	0.123625	0.0261218	8279	2.21625e-06	22.3951
Docosahexaenoate DHA; 22:6n3 levels	rs1018091	C	T	0.457063	0.0675472	0.0146699	8279	4.13525e-06	21.1986
Docosahexaenoate DHA; 22:6n3 levels	rs77207094	C	T	0.0186215	-0.248645	0.0546737	8279	5.42114e-06	20.68
Docosahexaenoate DHA; 22:6n3 levels	rs8523	A	G	0.429891	-0.0784228	0.0147676	8279	1.09343e-07	28.1976
Docosahexaenoate DHA; 22:6n3 levels	rs187828726	G	T	0.023446	-0.221919	0.0487912	8279	5.4067e-06	20.6849
Docosahexaenoate DHA; 22:6n3 levels	rs73045049	A	G	0.0352002	-0.182777	0.040097	8279	5.15535e-06	20.7762
Docosahexaenoate DHA; 22:6n3 levels	rs34736275	A	G	0.327588	0.0734802	0.0160133	8279	4.46044e-06	21.0536
Docosahexaenoate DHA; 22:6n3 levels	rs139278946	A	T	0.026335	-0.209975	0.0460257	8279	5.06353e-06	20.8105
Docosahexaenoate DHA; 22:6n3 levels	rs13268878	G	A	0.207876	-0.0830568	0.0187327	8279	9.25958e-06	19.6561
Docosahexaenoate DHA; 22:6n3 levels	rs117676889	C	T	0.0302902	0.194787	0.0430833	8279	6.15001e-06	20.4385
Docosahexaenoate DHA; 22:6n3 levels	rs148894582	G	A	0.0129169	-0.292453	0.0652677	8279	7.43554e-06	20.0753
Docosahexaenoate DHA; 22:6n3 levels	rs174603	A	G	0.318542	-0.0936123	0.015879	8279	3.73866e-09	34.751
Docosahexaenoate DHA; 22:6n3 levels	rs145325641	A	G	0.0247183	-0.229959	0.047234	8279	1.12451e-06	23.6995
Docosahexaenoate DHA; 22:6n3 levels	rs143268031	G	A	0.00507707	0.479847	0.104216	8279	4.13762e-06	21.1975
Docosahexaenoate DHA; 22:6n3 levels	rs73500833	T	C	0.0153501	-0.271564	0.0598372	8279	5.66876e-06	20.5944
Docosahexaenoate DHA; 22:6n3 levels	rs144230997	T	A	0.0116734	-0.321529	0.0691608	8279	3.33553e-06	21.6106
Docosahexaenoate DHA; 22:6n3 levels	rs1934826	A	G	0.454628	-0.065497	0.0148097	8279	9.75301e-06	19.5568
Docosahexaenoate DHA; 22:6n3 levels	rs9545715	C	G	0.553703	-0.0728917	0.0151593	8279	1.5215e-06	23.1177
Docosahexaenoate DHA; 22:6n3 levels	rs6564915	G	T	0.856833	0.101809	0.0218657	8279	3.2225e-06	21.6767
1-stearoyl-2-oleoyl-GPS (18:0/18:1) levels	rs2055570	G	A	0.927349	-0.135106	0.0304665	8055	9.22546e-06	19.663
1-stearoyl-2-oleoyl-GPS (18:0/18:1) levels	rs1354034	C	T	0.609726	0.138779	0.0159732	8055	3.68039e-18	75.4761
1-stearoyl-2-oleoyl-GPS (18:0/18:1) levels	rs78453362	A	G	0.0541305	0.154741	0.0347262	8055	8.34918e-06	19.8537
1-stearoyl-2-oleoyl-GPS (18:0/18:1) levels	rs78365257	C	G	0.0146308	-0.294515	0.065059	8055	5.98576e-06	20.4902
1-stearoyl-2-oleoyl-GPS (18:0/18:1) levels	rs6871550	C	T	0.205068	0.0882151	0.0195516	8055	6.4248e-06	20.3548
1-stearoyl-2-oleoyl-GPS (18:0/18:1) levels	rs12652405	A	T	0.0360831	-0.185696	0.041852	8055	9.12308e-06	19.6842
1-stearoyl-2-oleoyl-GPS (18:0/18:1) levels	rs154803	A	T	0.975691	0.228935	0.0506099	8055	6.08206e-06	20.4597
1-stearoyl-2-oleoyl-GPS (18:0/18:1) levels	rs9277341	C	T	0.310012	-0.0774887	0.0166568	8055	3.28633e-06	21.6391
1-stearoyl-2-oleoyl-GPS (18:0/18:1) levels	rs55731338	A	G	0.0289729	-0.21443	0.0462655	8055	3.57332e-06	21.4784
1-stearoyl-2-oleoyl-GPS (18:0/18:1) levels	rs17831607	G	A	0.139338	-0.106904	0.0224635	8055	1.94566e-06	22.6454
1-stearoyl-2-oleoyl-GPS (18:0/18:1) levels	rs13234046	A	G	0.223223	-0.0842069	0.0189265	8055	8.62088e-06	19.7925
1-stearoyl-2-oleoyl-GPS (18:0/18:1) levels	rs138806707	C	T	0.0200426	-0.258703	0.0555882	8055	3.25682e-06	21.6563
1-stearoyl-2-oleoyl-GPS (18:0/18:1) levels	rs118096873	A	G	0.0110821	-0.330974	0.0743846	8055	8.6072e-06	19.7956
1-stearoyl-2-oleoyl-GPS (18:0/18:1) levels	rs80312835	G	A	0.0139821	0.296795	0.0661347	8055	7.19855e-06	20.1373
1-stearoyl-2-oleoyl-GPS (18:0/18:1) levels	rs117022836	T	C	0.0293313	-0.228706	0.0457893	8055	5.89112e-07	24.9444
1-stearoyl-2-oleoyl-GPS (18:0/18:1) levels	rs7161063	G	C	0.0367098	-0.188363	0.0410966	8055	4.57413e-06	21.0051
1-stearoyl-2-oleoyl-GPS (18:0/18:1) levels	rs72761668	G	A	0.0422211	-0.173508	0.0382524	8055	5.73656e-06	20.5716
1-stearoyl-2-oleoyl-GPS (18:0/18:1) levels	rs55823223	A	G	0.150056	-0.10594	0.0217392	8055	1.09794e-06	23.7454
1-stearoyl-2-oleoyl-GPS (18:0/18:1) levels	rs12965592	C	G	0.113639	-0.109671	0.0247405	8055	9.30014e-06	19.6477
1-stearoyl-2-oleoyl-GPS (18:0/18:1) levels	rs75129304	G	T	0.223247	-0.0846584	0.0188206	8055	6.85413e-06	20.2311
1-stearoyl-2-oleoyl-GPS (18:0/18:1) levels	rs56058673	T	C	0.0591344	-0.155282	0.0336363	8055	3.90287e-06	21.3094
1-myristoyl-2-palmitoyl-gpc (14:0/16:0) levels	rs148311684	A	G	0.0126404	-0.303145	0.0683667	8271	9.24546e-06	19.6589
1-myristoyl-2-palmitoyl-gpc (14:0/16:0) levels	rs2996477	C	T	0.924975	0.131699	0.0294263	8271	7.62133e-06	20.0282
1-myristoyl-2-palmitoyl-gpc (14:0/16:0) levels	rs114128846	A	G	0.064399	0.147692	0.031243	8271	2.27645e-06	22.3437
1-myristoyl-2-palmitoyl-gpc (14:0/16:0) levels	rs79682447	A	G	0.0406628	-0.189114	0.0384282	8271	8.59963e-07	24.2156
1-myristoyl-2-palmitoyl-gpc (14:0/16:0) levels	rs28867983	G	A	0.201939	0.0850279	0.019173	8271	9.2171e-06	19.6648
1-myristoyl-2-palmitoyl-gpc (14:0/16:0) levels	rs4698782	C	T	0.439682	-0.0728829	0.0154847	8271	2.51668e-06	22.151
1-myristoyl-2-palmitoyl-gpc (14:0/16:0) levels	rs12331085	A	G	0.264501	-0.0932487	0.0176113	8271	1.19123e-07	28.0318
1-myristoyl-2-palmitoyl-gpc (14:0/16:0) levels	rs4975528	A	G	0.27399	0.0782659	0.0173632	8271	6.55743e-06	20.3158
1-myristoyl-2-palmitoyl-gpc (14:0/16:0) levels	rs147325198	A	G	0.014061	0.312097	0.065423	8271	1.83812e-06	22.7544
1-myristoyl-2-palmitoyl-gpc (14:0/16:0) levels	rs9349828	C	T	0.312933	0.073257	0.0164631	8271	8.59628e-06	19.7981
1-myristoyl-2-palmitoyl-gpc (14:0/16:0) levels	rs116926922	T	G	0.0329258	0.200887	0.0425847	8271	2.3894e-06	22.2507
1-myristoyl-2-palmitoyl-gpc (14:0/16:0) levels	rs10868484	C	T	0.160135	0.0967565	0.0211482	8271	4.75862e-06	20.9296
1-myristoyl-2-palmitoyl-gpc (14:0/16:0) levels	rs4485089	G	A	0.243905	-0.080974	0.0179663	8271	6.57522e-06	20.3105
1-myristoyl-2-palmitoyl-gpc (14:0/16:0) levels	rs79292294	G	T	0.0254391	0.217589	0.0488736	8271	8.50461e-06	19.8186
1-myristoyl-2-palmitoyl-gpc (14:0/16:0) levels	rs17583806	A	G	0.0741304	0.13245	0.0289892	8271	4.90168e-06	20.8727
1-myristoyl-2-palmitoyl-gpc (14:0/16:0) levels	rs2676379	G	C	0.534699	0.0709062	0.0153401	8271	3.79536e-06	21.3629
1-myristoyl-2-palmitoyl-gpc (14:0/16:0) levels	rs28704912	A	C	0.0874939	0.130285	0.0272362	8271	1.72261e-06	22.8793
1-myristoyl-2-palmitoyl-gpc (14:0/16:0) levels	rs142273297	A	G	0.0154583	0.275401	0.0618858	8271	8.58129e-06	19.8014
Paraxanthine levels	rs114830966	A	G	0.0106575	-0.351981	0.0784625	7840	7.25809e-06	20.1214
Paraxanthine levels	rs72799346	T	G	0.0217669	-0.243234	0.0539023	7840	6.40691e-06	20.36
Paraxanthine levels	rs10194878	C	T	0.283725	0.0812524	0.0177378	7840	4.63326e-06	20.9806
Paraxanthine levels	rs1503609	A	G	0.352215	0.073513	0.0166079	7840	9.58302e-06	19.5904
Paraxanthine levels	rs115087674	T	A	0.0133803	-0.308828	0.0689018	7840	7.38941e-06	20.0871
Paraxanthine levels	rs9370260	C	T	0.682724	0.0811845	0.01711	7840	2.08665e-06	22.5108
Paraxanthine levels	rs150604675	T	C	0.0306812	-0.211642	0.0468436	7840	6.24082e-06	20.4102
Paraxanthine levels	rs78574673	G	T	0.0254724	0.228458	0.0504438	7840	5.92737e-06	20.5089
Paraxanthine levels	rs118105917	T	C	0.00843666	-0.385059	0.0868612	7840	9.29138e-06	19.6493
Paraxanthine levels	rs7787264	A	T	0.110708	-0.112899	0.0255469	7840	9.90231e-06	19.5276
Paraxanthine levels	rs13243315	C	T	0.205073	-0.0931508	0.020119	7840	3.6566e-06	21.4341
Paraxanthine levels	rs150047778	C	T	0.0108029	-0.357145	0.0775345	7840	4.09938e-06	21.215
Paraxanthine levels	rs79361921	A	G	0.029188	-0.22819	0.0472548	7840	1.37267e-06	23.3156
Paraxanthine levels	rs78607630	G	A	0.0241997	-0.253719	0.0518432	7840	9.88221e-07	23.9479
Paraxanthine levels	rs11599254	T	C	0.0840498	0.137987	0.0286132	7840	1.41769e-06	23.2535
Paraxanthine levels	rs10509810	G	A	0.408098	-0.0767333	0.0163837	7840	2.82009e-06	21.9325
Paraxanthine levels	rs143167061	T	C	0.0194548	-0.255726	0.057744	7840	9.48373e-06	19.6101
Paraxanthine levels	rs11032948	T	C	0.245032	0.0933967	0.0187015	7840	5.91196e-07	24.9376
Paraxanthine levels	rs643104	C	T	0.336248	-0.081713	0.0174577	7840	2.86002e-06	21.9055
Paraxanthine levels	rs17653722	T	G	0.170187	-0.0950999	0.0212194	7840	7.40329e-06	20.0835
Paraxanthine levels	rs75467050	T	C	0.0391705	-0.181124	0.0407723	7840	8.89931e-06	19.7318
Paraxanthine levels	rs34563893	C	T	0.012781	-0.343882	0.0708587	7840	1.21566e-06	23.5493
Paraxanthine levels	rs2274148	T	C	0.0333248	0.199304	0.0441846	7840	6.46105e-06	20.3439
Paraxanthine levels	rs7326993	G	A	0.532382	-0.0721645	0.0163342	7840	9.96179e-06	19.5162
Paraxanthine levels	rs115520044	A	G	0.0170535	0.30686	0.0617075	7840	6.59906e-07	24.7257
Paraxanthine levels	rs28491088	C	A	0.15482	0.0994323	0.0223294	7840	8.46886e-06	19.8265
Paraxanthine levels	rs112492033	A	G	0.0190433	-0.270033	0.0581759	7840	3.45602e-06	21.5423
Paraxanthine levels	rs62017761	G	T	0.4716	-0.0738812	0.0158913	7840	3.33291e-06	21.6119
Paraxanthine levels	rs10459799	G	C	0.147324	-0.103929	0.0224526	7840	3.67743e-06	21.4232
Paraxanthine levels	rs57526497	C	A	0.940958	-0.154204	0.0338631	7840	5.27008e-06	20.734
Paraxanthine levels	rs77866717	C	T	0.0564862	-0.153486	0.0346997	7840	9.72234e-06	19.5628
Paraxanthine levels	rs56113850	C	T	0.573947	-0.111197	0.0159364	7840	3.00367e-12	48.68
Paraxanthine levels	rs2245730	C	A	0.434712	-0.0769941	0.0162704	7840	2.22152e-06	22.3905
4-methyl-2-oxopentanoate levels	rs2291115	T	C	0.188329	-0.0877537	0.0192477	8255	5.13532e-06	20.7836
4-methyl-2-oxopentanoate levels	rs6754181	C	T	0.840504	0.0935486	0.0202835	8255	3.98709e-06	21.2685
4-methyl-2-oxopentanoate levels	rs893971	G	A	0.399187	0.0924746	0.0150638	8255	8.31252e-10	37.6811
4-methyl-2-oxopentanoate levels	rs56107485	C	A	0.0606982	-0.152913	0.0307105	8255	6.38534e-07	24.7892
4-methyl-2-oxopentanoate levels	rs7012455	T	C	0.72081	0.0767546	0.0165318	8255	3.43625e-06	21.5534
4-methyl-2-oxopentanoate levels	rs112482875	C	G	0.0370528	0.183548	0.0390382	8255	2.57958e-06	22.1038
4-methyl-2-oxopentanoate levels	rs58729469	T	C	0.159237	0.0976357	0.0200177	8255	1.07452e-06	23.7868
4-methyl-2-oxopentanoate levels	rs73597221	A	G	0.0466309	-0.17389	0.0348777	8255	6.17385e-07	24.8543
4-methyl-2-oxopentanoate levels	rs75090459	A	G	0.017058	0.26568	0.0567147	8255	2.80646e-06	21.9419
4-methyl-2-oxopentanoate levels	rs12894999	A	G	0.813639	-0.0850341	0.019043	8255	7.99266e-06	19.9371
4-methyl-2-oxopentanoate levels	rs77753167	T	C	0.0607551	-0.147065	0.0310573	8255	2.18759e-06	22.4202
4-methyl-2-oxopentanoate levels	rs6055350	C	G	0.96283	-0.186005	0.0393211	8255	2.24051e-06	22.3741
3-indoxyl sulfate levels	rs140560919	C	T	0.0138957	0.292597	0.0654917	8242	7.90694e-06	19.9579
3-indoxyl sulfate levels	rs492467	G	A	0.400124	-0.0701385	0.0156135	8242	7.05018e-06	20.1771
3-indoxyl sulfate levels	rs55839541	A	G	0.139213	0.101358	0.0221088	8242	4.55069e-06	21.0152
3-indoxyl sulfate levels	rs4649261	G	A	0.388522	0.0737226	0.0158935	8242	3.50859e-06	21.5134
3-indoxyl sulfate levels	rs146369127	A	G	0.0185524	0.269587	0.0567278	8242	2.0112e-06	22.5815
3-indoxyl sulfate levels	rs7651697	C	T	0.496355	0.0706641	0.0155505	8242	5.51533e-06	20.647
3-indoxyl sulfate levels	rs4692540	T	G	0.837001	-0.0952962	0.0204074	8242	3.01657e-06	21.8033
3-indoxyl sulfate levels	rs191105317	G	C	0.0117339	-0.362577	0.0700538	8242	2.27061e-07	26.7846
3-indoxyl sulfate levels	rs13176353	C	G	0.891315	-0.114955	0.0245476	8242	2.82755e-06	21.9273
3-indoxyl sulfate levels	rs114842896	A	G	0.013081	0.30447	0.0669031	8242	5.34158e-06	20.7083
3-indoxyl sulfate levels	rs651578	C	T	0.240034	0.0800674	0.01791	8242	7.80184e-06	19.9833
3-indoxyl sulfate levels	rs6904845	C	T	0.743482	0.0774978	0.0174619	8242	9.07576e-06	19.6944
3-indoxyl sulfate levels	rs2496679	C	T	0.974437	0.213632	0.0481132	8242	8.98791e-06	19.7129
3-indoxyl sulfate levels	rs9479849	A	G	0.00753433	-0.39936	0.0884327	8242	6.30262e-06	20.3916
3-indoxyl sulfate levels	rs139986278	C	T	0.0116698	-0.315708	0.0706034	8242	7.76506e-06	19.9925
3-indoxyl sulfate levels	rs2016346	C	T	0.307059	-0.0742048	0.01661	8242	7.9147e-06	19.9559
3-indoxyl sulfate levels	rs74334677	A	G	0.0306073	-0.217425	0.0447759	8242	1.19873e-06	23.5764
3-indoxyl sulfate levels	rs117023050	C	T	0.0449466	0.16474	0.0370405	8242	8.68438e-06	19.7784
3-indoxyl sulfate levels	rs11078452	C	A	0.980903	-0.266191	0.0555632	8242	1.66138e-06	22.9488
3-indoxyl sulfate levels	rs1971157	C	G	0.381295	0.0712004	0.0160318	8242	8.94547e-06	19.7218
3-indoxyl sulfate levels	rs198542	A	G	0.454857	0.0702721	0.0153512	8242	4.70302e-06	20.9521
3-indoxyl sulfate levels	rs72987107	T	C	0.0209548	-0.255879	0.0532644	8242	1.55571e-06	23.075
3-indoxyl sulfate levels	rs56113850	C	T	0.576131	-0.076687	0.0152603	8242	5.02725e-07	25.2502
Sphingosine 1-phosphate levels	rs140079282	A	C	0.0184262	-0.261606	0.056463	8246	3.60008e-06	21.4642
Sphingosine 1-phosphate levels	rs1488103	A	G	0.393833	-0.0723142	0.015939	8246	5.70756e-06	20.5813
Sphingosine 1-phosphate levels	rs1456759	T	C	0.737365	-0.0816351	0.0173502	8246	2.53695e-06	22.1356
Sphingosine 1-phosphate levels	rs115939317	T	C	0.0153631	0.27762	0.0620996	8246	7.80146e-06	19.9835
Sphingosine 1-phosphate levels	rs41397245	A	G	0.378124	-0.0776802	0.0161082	8246	1.41834e-06	23.2527
Sphingosine 1-phosphate levels	rs71588370	G	A	0.0394801	0.184415	0.0392364	8246	2.60043e-06	22.0883
Sphingosine 1-phosphate levels	rs138132596	G	A	0.00497814	0.513535	0.109227	8246	2.58227e-06	22.1018
Sphingosine 1-phosphate levels	rs141116536	C	T	0.0266543	0.229382	0.0484838	8246	2.233e-06	22.3806
Sphingosine 1-phosphate levels	rs9461721	G	A	0.0262263	-0.256109	0.0478132	8246	8.48745e-08	28.6881
Sphingosine 1-phosphate levels	rs9360664	A	G	0.1805	-0.0936889	0.0200697	8246	3.03896e-06	21.7892
Sphingosine 1-phosphate levels	rs11986857	G	C	0.0606116	0.147791	0.0320867	8246	4.10483e-06	21.2126
Sphingosine 1-phosphate levels	rs10960927	C	T	0.0494112	0.157515	0.0353441	8246	8.32674e-06	19.859
Sphingosine 1-phosphate levels	rs10744901	C	T	0.317054	-0.0733906	0.0164198	8246	7.83555e-06	19.9753
Sphingosine 1-phosphate levels	rs6493965	G	A	0.644609	-0.0718094	0.0160027	8246	7.21237e-06	20.1337
Sphingosine 1-phosphate levels	rs7200047	A	G	0.49245	0.0725737	0.0157374	8246	3.99671e-06	21.2638
Sphingosine 1-phosphate levels	rs1000821	T	C	0.460226	0.0955501	0.0152708	8246	3.92298e-10	39.1459
Sphingosine 1-phosphate levels	rs10502344	G	A	0.0362631	0.190151	0.0413987	8246	4.36607e-06	21.0946
Alpha-hydroxyisocaproate levels	rs72859389	C	A	0.0611044	0.132036	0.029663	8250	8.53929e-06	19.8108
Alpha-hydroxyisocaproate levels	rs142728688	A	G	0.0227938	-0.23423	0.0483974	8250	1.30022e-06	23.4201
Alpha-hydroxyisocaproate levels	rs142808012	T	A	0.0149562	0.267776	0.059366	8250	6.46449e-06	20.343
Alpha-hydroxyisocaproate levels	rs1955284	T	C	0.807407	0.0830487	0.0184612	8250	6.84165e-06	20.2345
Alpha-hydroxyisocaproate levels	rs4852728	A	C	0.178937	-0.0864222	0.0188155	8250	4.36647e-06	21.0944
Alpha-hydroxyisocaproate levels	rs11715398	T	C	0.105338	0.116068	0.0236777	8250	9.48658e-07	24.0267
Alpha-hydroxyisocaproate levels	rs1808859	C	T	0.44434	0.0726542	0.0146613	8250	7.21386e-07	24.5541
Alpha-hydroxyisocaproate levels	rs35783478	A	G	0.231208	0.0830143	0.0171179	8250	1.23742e-06	23.5154
Alpha-hydroxyisocaproate levels	rs620617	T	C	0.599716	-0.070098	0.0147602	8250	2.0429e-06	22.5514
Alpha-hydroxyisocaproate levels	rs1975533	G	A	0.116319	-0.119704	0.0225894	8250	1.16365e-07	28.0773
Alpha-hydroxyisocaproate levels	rs34973031	C	A	0.0853852	-0.123459	0.0259273	8250	1.91937e-06	22.6714
Alpha-hydroxyisocaproate levels	rs7737487	A	G	0.595653	0.0727989	0.0146176	8250	6.35102e-07	24.7996
Alpha-hydroxyisocaproate levels	rs734860	C	T	0.602667	0.0779035	0.0152545	8250	3.27446e-07	26.0775
Alpha-hydroxyisocaproate levels	rs62485457	C	T	0.0221196	0.228417	0.0492927	8250	3.58845e-06	21.4703
Alpha-hydroxyisocaproate levels	rs76445723	T	G	0.0211627	-0.227203	0.0503536	8250	6.41715e-06	20.357
Alpha-hydroxyisocaproate levels	rs4934976	A	G	0.657788	-0.0731137	0.0155296	8250	2.50131e-06	22.1628
Alpha-hydroxyisocaproate levels	rs10832920	G	A	0.539011	-0.0659084	0.0142595	8250	3.79896e-06	21.3609
Alpha-hydroxyisocaproate levels	rs113914810	T	C	0.0292252	0.195815	0.0434709	8250	6.65286e-06	20.2881
Alpha-hydroxyisocaproate levels	rs78820411	G	A	0.0386388	0.170371	0.0373253	8250	5.0068e-06	20.8321
Alpha-hydroxyisocaproate levels	rs10414919	A	G	0.280961	-0.0797399	0.0161833	8250	8.33707e-07	24.2753
Alpha-hydroxyisocaproate levels	rs151029917	T	G	0.0064524	0.405287	0.0904053	8250	7.36017e-06	20.0949
Alpha-hydroxyisocaproate levels	rs79376596	G	A	0.0291836	0.195553	0.0432889	8250	6.26065e-06	20.4044
1-stearoyl-GPI (18:0) levels	rs10789117	C	A	0.341811	-0.0805466	0.0157387	8260	3.09195e-07	26.1881
1-stearoyl-GPI (18:0) levels	rs9436300	G	A	0.68347	0.0754039	0.0169789	8260	8.95281e-06	19.7204
1-stearoyl-GPI (18:0) levels	rs151115380	T	C	0.0130281	0.310888	0.0661973	8260	2.64817e-06	22.0534
1-stearoyl-GPI (18:0) levels	rs13035306	T	C	0.05619	-0.156036	0.0325815	8260	1.67535e-06	22.9327
1-stearoyl-GPI (18:0) levels	rs35311550	C	T	0.0141818	-0.322065	0.0642743	8260	5.42083e-07	25.105
1-stearoyl-GPI (18:0) levels	rs7610125	T	C	0.436891	-0.0758416	0.0155174	8260	1.02115e-06	23.885
1-stearoyl-GPI (18:0) levels	rs139782415	T	C	0.0899487	0.126378	0.0264791	8260	1.81728e-06	22.7763
1-stearoyl-GPI (18:0) levels	rs6849130	C	T	0.118281	-0.108294	0.0237693	8260	5.21256e-06	20.755
1-stearoyl-GPI (18:0) levels	rs4266604	C	T	0.294749	0.0745017	0.0166127	8260	7.30464e-06	20.1094
1-stearoyl-GPI (18:0) levels	rs117400415	G	C	0.186215	0.0888842	0.0195487	8260	5.44662e-06	20.671
1-stearoyl-GPI (18:0) levels	rs13265847	G	A	0.942421	-0.156331	0.0336519	8260	3.39176e-06	21.5784
1-stearoyl-GPI (18:0) levels	rs78765237	A	G	0.0204739	0.24977	0.053264	8260	2.74152e-06	21.9867
1-stearoyl-GPI (18:0) levels	rs1836921	A	G	0.276299	-0.0775788	0.0170992	8260	5.70656e-06	20.5817
1-stearoyl-GPI (18:0) levels	rs2435583	G	A	0.164587	-0.0990229	0.0204562	8260	1.29364e-06	23.4298
1-stearoyl-GPI (18:0) levels	rs7302336	A	G	0.112836	0.113218	0.0239989	8260	2.38589e-06	22.2534
1-stearoyl-GPI (18:0) levels	rs1555942	A	T	0.965825	0.188681	0.0418631	8260	6.57211e-06	20.3115
1-stearoyl-GPI (18:0) levels	rs113735393	A	G	0.0352927	-0.207519	0.0411356	8260	4.54134e-07	25.4465
1-stearoyl-GPI (18:0) levels	rs141437456	T	C	0.00988166	-0.347399	0.0764493	8260	5.51496e-06	20.647
1,2-dipalmitoyl-gpc (16:0/16:0) levels	rs2745311	A	C	0.535022	0.0702244	0.0154888	8264	5.79093e-06	20.5536
1,2-dipalmitoyl-gpc (16:0/16:0) levels	rs2032969	A	G	0.106101	-0.111093	0.0248798	8264	8.00062e-06	19.9355
1,2-dipalmitoyl-gpc (16:0/16:0) levels	rs6753019	A	G	0.837465	-0.0961117	0.0210504	8264	4.97633e-06	20.8439
1,2-dipalmitoyl-gpc (16:0/16:0) levels	rs145128297	A	G	0.014713	-0.298888	0.0637577	8264	2.76062e-06	21.9735
1,2-dipalmitoyl-gpc (16:0/16:0) levels	rs4920834	A	G	0.764055	0.0902345	0.0181074	8264	6.25094e-07	24.8302
1,2-dipalmitoyl-gpc (16:0/16:0) levels	rs1061808	G	T	0.631678	0.200092	0.0156583	8264	2.15628e-37	163.274
1,2-dipalmitoyl-gpc (16:0/16:0) levels	rs9374755	C	T	0.306209	-0.0754855	0.0167415	8264	6.51662e-06	20.3276
1,2-dipalmitoyl-gpc (16:0/16:0) levels	rs183181954	G	A	0.0018173	0.857517	0.179475	8264	1.77117e-06	22.8257
1,2-dipalmitoyl-gpc (16:0/16:0) levels	rs12544703	G	A	0.182667	-0.106164	0.019997	8264	1.1023e-07	28.182
1,2-dipalmitoyl-gpc (16:0/16:0) levels	rs72728195	C	T	0.307461	-0.0764083	0.0166291	8264	4.33073e-06	21.1101
1,2-dipalmitoyl-gpc (16:0/16:0) levels	rs185772485	G	A	0.0180312	-0.277576	0.0576862	8264	1.4955e-06	23.1509
1,2-dipalmitoyl-gpc (16:0/16:0) levels	rs7900015	A	G	0.0481855	0.160184	0.0357053	8264	7.24796e-06	20.1243
1,2-dipalmitoyl-gpc (16:0/16:0) levels	rs102275	C	T	0.34593	-0.220549	0.015913	8264	1.11176e-43	192.067
1,2-dipalmitoyl-gpc (16:0/16:0) levels	rs3019671	T	C	0.39617	-0.0743413	0.0156753	8264	2.11027e-06	22.4893
1,2-dipalmitoyl-gpc (16:0/16:0) levels	rs10778301	A	G	0.461879	-0.0693898	0.0154191	8264	6.78686e-06	20.2498
1,2-dipalmitoyl-gpc (16:0/16:0) levels	rs7320739	G	T	0.166891	-0.0957937	0.0206722	8264	3.58761e-06	21.4708
1,2-dipalmitoyl-gpc (16:0/16:0) levels	rs61979368	T	C	0.247334	0.0825341	0.0180997	8264	5.11584e-06	20.7908
1,2-dipalmitoyl-gpc (16:0/16:0) levels	rs45617141	G	T	0.0177024	0.264148	0.0582611	8264	5.79112e-06	20.5535
1,2-dipalmitoyl-gpc (16:0/16:0) levels	rs1601935	T	G	0.650326	-0.0771848	0.0168088	8264	4.39154e-06	21.0833
1,2-dipalmitoyl-gpc (16:0/16:0) levels	rs12438714	T	G	0.0645318	-0.138473	0.0307182	8264	6.54901e-06	20.3182
1,2-dipalmitoyl-gpc (16:0/16:0) levels	rs117470433	T	C	0.0176685	0.26326	0.0585744	8264	6.97514e-06	20.1977
1,2-dipalmitoyl-gpc (16:0/16:0) levels	rs141357957	T	C	0.0127443	-0.30519	0.0679417	8264	7.05785e-06	20.1751
1,2-dipalmitoyl-gpc (16:0/16:0) levels	rs17231506	T	C	0.325307	0.0901668	0.0162354	8264	2.79678e-08	30.84
1,2-dipalmitoyl-gpc (16:0/16:0) levels	rs57942043	C	A	0.0448804	0.167765	0.0372989	8264	6.86419e-06	20.2282
1,2-dipalmitoyl-gpc (16:0/16:0) levels	rs17248720	T	C	0.113267	-0.122497	0.0238862	8264	2.92288e-07	26.2969
1,2-dipalmitoyl-gpc (16:0/16:0) levels	rs117752111	G	A	0.0207753	0.239516	0.0538015	8264	8.51368e-06	19.8165
1,2-dipalmitoyl-gpc (16:0/16:0) levels	rs2075269	C	T	0.24807	-0.0815166	0.0180752	8264	6.48731e-06	20.3364
Maleate levels	rs72710584	G	A	0.140637	-0.105459	0.0227622	8171	3.60232e-06	21.4628
Maleate levels	rs139060216	C	T	0.0331348	-0.195659	0.0433217	8171	6.28953e-06	20.3956
Maleate levels	rs3856630	C	T	0.0194312	0.247925	0.0558662	8171	9.08718e-06	19.692
Maleate levels	rs116633901	G	T	0.0244785	0.224574	0.0501538	8171	7.54464e-06	20.0474
Maleate levels	rs62337911	G	A	0.0398995	-0.191127	0.0392515	8171	1.12e-06	23.7071
Maleate levels	rs6553200	T	C	0.273903	-0.0778103	0.017129	8171	5.55614e-06	20.6327
Maleate levels	rs150357582	T	G	0.00817154	-0.424684	0.0860667	8171	8.04149e-07	24.3449
Maleate levels	rs13200335	A	C	0.40824	-0.0760477	0.0156955	8171	1.26496e-06	23.473
Maleate levels	rs73073176	T	C	0.130699	-0.120147	0.0230713	8171	1.91233e-07	27.1162
Maleate levels	rs10504250	G	C	0.32379	-0.0742667	0.0165607	8171	7.30761e-06	20.1084
Maleate levels	rs117247923	A	G	0.0161251	0.285202	0.0612361	8171	3.20202e-06	21.6889
Maleate levels	rs12376985	G	A	0.119885	0.1074	0.023991	8171	7.58163e-06	20.0382
Maleate levels	rs75102017	C	G	0.0104294	-0.344294	0.075865	8171	5.67231e-06	20.5932
Maleate levels	rs61880906	C	A	0.0528864	-0.160747	0.0347303	8171	3.68428e-06	21.4198
Maleate levels	rs74069834	G	A	0.0174547	-0.276781	0.0589389	8171	2.65226e-06	22.0503
Maleate levels	rs73396358	T	G	0.0625536	-0.142941	0.0315949	8171	6.06315e-06	20.4657
Maleate levels	rs115520044	A	G	0.0166093	0.286001	0.0604766	8171	2.25496e-06	22.3618
Maleate levels	rs2472297	T	C	0.250184	0.0860376	0.0177102	8171	1.18529e-06	23.5981
Maleate levels	rs76680658	C	G	0.0357502	-0.200611	0.0420445	8171	1.82957e-06	22.7634
Maleate levels	rs7245628	A	G	0.684799	0.076776	0.0170744	8171	6.90652e-06	20.2165
Maleate levels	rs117261516	A	G	0.014088	0.350122	0.0658295	8171	1.04557e-07	28.2842
Maleate levels	rs61457016	G	T	0.0211932	-0.269244	0.0526641	8171	3.17963e-07	26.1342
Maleate levels	rs6137886	G	T	0.047164	0.165992	0.0366881	8171	6.0563e-06	20.4678
Maleate levels	rs116882896	G	A	0.0467255	-0.166328	0.0373322	8171	8.37579e-06	19.8477
Isovalerate (i5:0) levels	rs114248797	G	T	0.00987764	0.36155	0.0786193	7862	4.25051e-06	21.1458
Isovalerate (i5:0) levels	rs59173308	A	G	0.0465636	-0.171301	0.036733	7862	3.11005e-06	21.7446
Isovalerate (i5:0) levels	rs887829	T	C	0.324211	0.0820467	0.0165917	7862	7.61251e-07	24.4504
Isovalerate (i5:0) levels	rs2407999	G	A	0.121513	0.114291	0.0243102	7862	2.58439e-06	22.1
Isovalerate (i5:0) levels	rs9295793	A	C	0.155247	-0.0973961	0.0213833	7862	5.24433e-06	20.7433
Isovalerate (i5:0) levels	rs142706506	G	T	0.0209884	0.254733	0.0544181	7862	2.8543e-06	21.9093
Isovalerate (i5:0) levels	rs80329585	C	A	0.0104605	-0.348749	0.0765056	7862	5.15269e-06	20.7771
Isovalerate (i5:0) levels	rs7047835	C	T	0.939029	-0.147304	0.0325318	7862	5.95455e-06	20.5002
Isovalerate (i5:0) levels	rs117350340	C	T	0.0487695	-0.16461	0.0364871	7862	6.43849e-06	20.3507
Isovalerate (i5:0) levels	rs150981358	A	G	0.0266753	0.227853	0.0482807	7862	2.36619e-06	22.2693
Isovalerate (i5:0) levels	rs188242626	T	C	0.0252273	-0.239692	0.0496341	7862	1.37102e-06	23.318
Isovalerate (i5:0) levels	rs117742113	T	C	0.0245285	-0.234768	0.0504297	7862	3.23437e-06	21.6695
Isovalerate (i5:0) levels	rs8014050	G	A	0.411232	-0.0705248	0.0158333	7862	8.4206e-06	19.8374
Isovalerate (i5:0) levels	rs35721219	T	C	0.0488957	0.162517	0.0360284	7862	6.45813e-06	20.3448
Isovalerate (i5:0) levels	rs117546625	G	A	0.0268893	-0.236693	0.0482055	7862	9.10349e-07	24.1058
Isovalerate (i5:0) levels	rs112755187	T	C	0.0442732	-0.177624	0.0377539	7862	2.54124e-06	22.1322
Isovalerate (i5:0) levels	rs4815566	T	C	0.112645	0.111171	0.0247376	7862	6.98957e-06	20.1935
4-acetylphenol sulfate levels	rs3767942	G	A	0.268484	0.0875381	0.018901	7135	3.632e-06	21.4469
4-acetylphenol sulfate levels	rs114393741	A	G	0.0144521	0.302597	0.068433	7135	9.78836e-06	19.5496
4-acetylphenol sulfate levels	rs144625636	T	C	0.0136746	0.317716	0.0716714	7135	9.29501e-06	19.6483
4-acetylphenol sulfate levels	rs6756669	G	A	0.713592	0.0812734	0.018386	7135	9.85196e-06	19.5372
4-acetylphenol sulfate levels	rs116272095	C	G	0.015461	0.318113	0.0666451	7135	1.8128e-06	22.7806
4-acetylphenol sulfate levels	rs76793324	C	T	0.0163265	0.293567	0.0653061	7135	6.94898e-06	20.2044
4-acetylphenol sulfate levels	rs1969346	T	C	0.0494096	0.169438	0.0381465	7135	8.92236e-06	19.7266
4-acetylphenol sulfate levels	rs78621707	A	G	0.021614	0.278554	0.0565295	7135	8.32509e-07	24.2777
4-acetylphenol sulfate levels	rs13102958	G	A	0.417198	0.0755964	0.0167714	7135	6.561e-06	20.3143
4-acetylphenol sulfate levels	rs4355631	G	A	0.491424	-0.0795996	0.017082	7135	3.16418e-06	21.7112
4-acetylphenol sulfate levels	rs10101376	G	A	0.388492	0.0755876	0.0168628	7135	7.37679e-06	20.09
4-acetylphenol sulfate levels	rs1521039	G	A	0.890797	-0.133494	0.0265452	7135	4.93156e-07	25.2866
4-acetylphenol sulfate levels	rs12354542	C	T	0.0506867	-0.175898	0.0373161	7135	2.43208e-06	22.2161
4-acetylphenol sulfate levels	rs11040389	T	C	0.434185	0.0796657	0.0165432	7135	1.46752e-06	23.1869
4-acetylphenol sulfate levels	rs79284264	C	T	0.0256537	0.231367	0.0522866	7135	9.64488e-06	19.5777
4-acetylphenol sulfate levels	rs12319193	T	G	0.00835909	0.439649	0.0912265	7135	1.4405e-06	23.2225
4-acetylphenol sulfate levels	rs12878900	G	A	0.112711	-0.132112	0.0261536	7135	4.38603e-07	25.513
4-acetylphenol sulfate levels	rs116938011	T	C	0.00979701	-0.380537	0.0845499	7135	6.77187e-06	20.2538
4-acetylphenol sulfate levels	rs12444105	G	A	0.63628	-0.0782771	0.0172342	7135	5.57301e-06	20.6265
4-acetylphenol sulfate levels	rs739244	G	A	0.748831	-0.0872158	0.0188382	7135	3.66143e-06	21.4314
Phenyllactate (pla) levels	rs10802092	T	A	0.593586	0.0695791	0.0148237	8235	2.68229e-06	22.0288
Phenyllactate (pla) levels	rs13396369	T	C	0.187179	0.0893767	0.0186298	8235	1.60652e-06	23.0133
Phenyllactate (pla) levels	rs116721959	T	C	0.0251855	-0.21061	0.0459716	8235	4.62048e-06	20.9858
Phenyllactate (pla) levels	rs34064769	A	C	0.525012	0.0678602	0.0145435	8235	3.07118e-06	21.7691
Phenyllactate (pla) levels	rs78199411	C	T	0.0356752	0.183637	0.0391572	8235	2.73534e-06	21.991
Phenyllactate (pla) levels	rs2359874	T	C	0.61135	0.0730231	0.0149781	8235	1.08636e-06	23.7659
Phenyllactate (pla) levels	rs79724540	T	C	0.112452	-0.117073	0.0231742	8235	4.37544e-07	25.5183
Phenyllactate (pla) levels	rs4291084	G	A	0.724661	-0.082695	0.016704	8235	7.39797e-07	24.5056
Phenyllactate (pla) levels	rs9470970	A	G	0.0663122	-0.145262	0.0290503	8235	5.72199e-07	25.0006
Phenyllactate (pla) levels	rs9476273	A	T	0.168047	-0.0860871	0.0194551	8235	9.64816e-06	19.5775
Phenyllactate (pla) levels	rs12529420	A	G	0.381239	0.0674951	0.0150882	8235	7.69938e-06	20.0086
Phenyllactate (pla) levels	rs17634070	A	T	0.0544231	0.154338	0.033383	8235	3.77759e-06	21.3719
Phenyllactate (pla) levels	rs73396011	G	A	0.0595044	0.149295	0.0310577	8235	1.53204e-06	23.1046
Phenyllactate (pla) levels	rs7867041	A	G	0.226371	0.0783952	0.0173588	8235	6.29683e-06	20.3933
Phenyllactate (pla) levels	rs73669981	T	C	0.034831	-0.194512	0.039425	8235	8.06738e-07	24.3387
Phenyllactate (pla) levels	rs10834052	C	T	0.802512	0.0807497	0.0182606	8235	9.77604e-06	19.5524
Phenyllactate (pla) levels	rs73351721	A	G	0.061443	-0.14389	0.0302864	8235	2.02424e-06	22.569
Phenyllactate (pla) levels	rs17783490	T	G	0.0427215	0.165104	0.035623	8235	3.5738e-06	21.4784
Phenyllactate (pla) levels	rs937475	G	A	0.599404	-0.0703956	0.0148295	8235	2.06466e-06	22.5312
Phenyllactate (pla) levels	rs35446494	G	A	0.0382979	0.171055	0.0375046	8235	5.09335e-06	20.7993
Phenyllactate (pla) levels	rs56381820	C	T	0.203436	0.0842604	0.0180851	8235	3.17568e-06	21.7046
Phenyllactate (pla) levels	rs7141384	G	T	0.333722	-0.0706039	0.0152423	8235	3.61956e-06	21.4538
Phenyllactate (pla) levels	rs11076256	T	C	0.0778439	0.447662	0.0265192	8235	6.2441e-64	284.923
Phenyllactate (pla) levels	rs143277630	T	C	0.0478586	-0.194762	0.0339985	8235	1.01287e-08	32.8123
Phenyllactate (pla) levels	rs74546847	T	C	0.0222438	-0.242796	0.0487618	8235	6.38388e-07	24.7897
Phenyllactate (pla) levels	rs143566944	T	C	0.0130189	0.287805	0.0642476	8235	7.47717e-06	20.0646
N-acetylaspartate (naa) levels	rs12039358	G	T	0.227402	-0.0910294	0.0184878	8148	8.49033e-07	24.2404
N-acetylaspartate (naa) levels	rs35308250	C	A	0.292432	0.0764696	0.0169105	8148	6.12521e-06	20.4461
N-acetylaspartate (naa) levels	rs139706814	G	A	0.0328242	-0.196608	0.0437219	8148	6.89914e-06	20.2186
N-acetylaspartate (naa) levels	rs62127223	A	G	0.0820923	-0.136176	0.0283979	8148	1.62445e-06	22.9919
N-acetylaspartate (naa) levels	rs9869057	C	T	0.998185	-0.811824	0.183334	8148	9.50571e-06	19.6058
N-acetylaspartate (naa) levels	rs150965318	C	T	0.0276535	-0.209464	0.0468532	8148	7.79847e-06	19.9842
N-acetylaspartate (naa) levels	rs544693361	T	C	0.0104899	-0.347238	0.0754801	8148	4.217e-06	21.161
N-acetylaspartate (naa) levels	rs79315153	G	A	0.116476	-0.10644	0.0237273	8148	7.25895e-06	20.1215
N-acetylaspartate (naa) levels	rs2248456	A	G	0.494379	0.0745846	0.0154974	8148	1.48899e-06	23.1594
N-acetylaspartate (naa) levels	rs35911794	C	T	0.0338346	0.192938	0.042974	8148	7.13446e-06	20.1544
N-acetylaspartate (naa) levels	rs10845794	T	G	0.536408	-0.0705395	0.0158112	8148	8.1442e-06	19.9013
N-acetylaspartate (naa) levels	rs74895134	A	G	0.0166503	0.266447	0.0599771	8148	8.89292e-06	19.7332
N-acetylaspartate (naa) levels	rs117572246	A	G	0.0128793	-0.335037	0.0692125	8148	1.29385e-06	23.4295
N-acetylaspartate (naa) levels	rs2025408	A	C	0.0106869	-0.336702	0.0757383	8148	8.76491e-06	19.7609
N-acetylaspartate (naa) levels	rs150753233	G	A	0.00908417	0.388784	0.0814519	8148	1.81348e-06	22.7804
N-acetylaspartate (naa) levels	rs11073480	G	A	0.157032	0.0960883	0.021254	8148	6.1561e-06	20.4365
N-acetylaspartate (naa) levels	rs113199593	G	A	0.0116265	-0.318765	0.0717581	8148	8.90352e-06	19.7309
N-acetylaspartate (naa) levels	rs74509445	T	C	0.0667167	-0.139499	0.0313242	8148	8.4528e-06	19.8303
N-acetylaspartate (naa) levels	rs11868853	G	A	0.260506	0.0822351	0.0175866	8148	2.92522e-06	21.8624
N-acetylaspartate (naa) levels	rs80135198	T	C	0.0169512	0.27184	0.0603487	8148	6.65316e-06	20.2879
N-acetylaspartate (naa) levels	rs409751	T	C	0.558491	0.0743278	0.0161645	8148	4.26133e-06	21.141
Palmitoylcarnitine (C16) levels	rs113511960	T	C	0.015033	-0.28963	0.0631312	8256	4.48072e-06	21.0449
Palmitoylcarnitine (C16) levels	rs17569868	C	A	0.211224	0.0839015	0.0186144	8256	6.56434e-06	20.3137
Palmitoylcarnitine (C16) levels	rs1799822	G	A	0.22902	0.084205	0.0181362	8256	3.43522e-06	21.5541
Palmitoylcarnitine (C16) levels	rs10157929	G	C	0.139648	0.101191	0.0219394	8256	3.98265e-06	21.2707
Palmitoylcarnitine (C16) levels	rs72696241	A	G	0.276009	0.0788913	0.0170751	8256	3.83246e-06	21.3442
Palmitoylcarnitine (C16) levels	rs114684303	A	C	0.0122771	-0.326277	0.0685956	8256	1.96945e-06	22.6218
Palmitoylcarnitine (C16) levels	rs13386197	G	C	0.0520528	0.150287	0.033948	8256	9.55699e-06	19.5957
Palmitoylcarnitine (C16) levels	rs2167534	A	G	0.310582	-0.0774604	0.0172303	8256	6.9379e-06	20.2079
Palmitoylcarnitine (C16) levels	rs72906893	T	C	0.176603	0.0927839	0.0204954	8256	5.98074e-06	20.4918
Palmitoylcarnitine (C16) levels	rs62264777	C	G	0.138361	-0.106325	0.0219678	8256	1.29823e-06	23.4231
Palmitoylcarnitine (C16) levels	rs79450911	T	C	0.0222007	-0.240404	0.0517006	8256	3.32062e-06	21.6192
Palmitoylcarnitine (C16) levels	rs2612989	A	G	0.822267	0.0945784	0.0198049	8256	1.79262e-06	22.8027
Palmitoylcarnitine (C16) levels	rs2963905	A	C	0.716492	-0.0810907	0.0169006	8256	1.60178e-06	23.0189
Palmitoylcarnitine (C16) levels	rs72777087	G	A	0.170976	0.0928261	0.0202234	8256	4.43193e-06	21.0659
Palmitoylcarnitine (C16) levels	rs2631367	G	C	0.522391	0.123473	0.0151912	8256	4.36667e-16	66.0552
Palmitoylcarnitine (C16) levels	rs143370068	T	C	0.0121017	-0.313926	0.0696259	8256	6.52081e-06	20.3264
Palmitoylcarnitine (C16) levels	rs12205483	T	C	0.0220643	-0.234035	0.0522496	8256	7.49341e-06	20.0606
Palmitoylcarnitine (C16) levels	rs12210538	G	A	0.238471	-0.169243	0.0176414	8256	8.51296e-22	92.0243
Palmitoylcarnitine (C16) levels	rs7069718	T	A	0.774869	0.0805832	0.0181037	8256	8.53953e-06	19.8108
Palmitoylcarnitine (C16) levels	rs1171623	T	G	0.224491	0.105784	0.018426	8256	9.41016e-09	32.9553
Palmitoylcarnitine (C16) levels	rs144564761	C	G	0.0199488	-0.256635	0.0546859	8256	2.69376e-06	22.0206
Palmitoylcarnitine (C16) levels	rs174544	A	C	0.301651	-0.0864977	0.0165349	8256	1.6841e-07	27.3623
Palmitoylcarnitine (C16) levels	rs111269071	C	T	0.0679766	0.139429	0.0302597	8256	4.07088e-06	21.2287
Palmitoylcarnitine (C16) levels	rs887477	C	A	0.515027	0.0717292	0.0155223	8256	3.81827e-06	21.3514
Palmitoylcarnitine (C16) levels	rs7143692	G	A	0.207493	0.0865656	0.0187875	8256	4.07316e-06	21.2276
Palmitoylcarnitine (C16) levels	rs12907371	C	G	0.119042	0.107415	0.0238374	8256	6.60189e-06	20.303
Palmitoylcarnitine (C16) levels	rs138066517	T	C	0.0341557	-0.18999	0.042387	8256	7.38534e-06	20.0883
Palmitoylcarnitine (C16) levels	rs75555206	A	G	0.0239287	-0.22333	0.0498164	8256	7.35818e-06	20.0954
Palmitoylcarnitine (C16) levels	rs74714644	A	G	0.0133511	0.302034	0.0660287	8256	4.7787e-06	20.9215
Palmitoylcarnitine (C16) levels	rs78422675	T	C	0.00466836	0.557491	0.111628	8256	5.90816e-07	24.9389
Palmitoylcarnitine (C16) levels	rs6029454	G	C	0.0473096	-0.157828	0.0354391	8256	8.44814e-06	19.8313
Erythritol levels	rs72692616	A	G	0.0535583	-0.333531	0.0319348	8167	1.55926e-25	109.066
Erythritol levels	rs150074699	A	G	0.000613196	1.31346	0.291544	8167	6.63157e-06	20.2942
Erythritol levels	rs376874259	G	T	0.0422138	-0.178181	0.0359668	8167	7.26855e-07	24.5395
Erythritol levels	rs75505443	T	A	0.00756272	0.369506	0.0830332	8167	8.58302e-06	19.801
Erythritol levels	rs55769487	T	C	0.152674	0.0923657	0.0199838	8167	3.79984e-06	21.3605
Erythritol levels	rs116078994	A	C	0.0183301	0.252839	0.0537262	8167	2.52558e-06	22.1443
Erythritol levels	rs9858049	T	C	0.123202	-0.135463	0.0219498	8167	6.76417e-10	38.0826
Erythritol levels	rs12633047	T	C	0.0692572	0.130274	0.0282786	8167	4.08865e-06	21.2201
Erythritol levels	rs4426692	G	A	0.331673	-0.068372	0.0152462	8167	7.30789e-06	20.1085
Erythritol levels	rs9813594	C	T	0.659893	-0.0730144	0.0154387	8167	2.253e-06	22.3636
Erythritol levels	rs142601344	T	C	0.0113622	0.34102	0.0685053	8167	6.42442e-07	24.7775
Erythritol levels	rs27598	A	G	0.616334	-0.0675333	0.0149044	8167	5.86762e-06	20.5283
Erythritol levels	rs144368133	G	A	0.0107812	-0.33485	0.0704029	8167	1.97275e-06	22.6186
Erythritol levels	rs553220097	C	G	0.000260383	2.05383	0.460821	8167	8.31522e-06	19.8615
Erythritol levels	rs79695006	G	A	0.0571607	0.146655	0.0312792	8167	2.75113e-06	21.9801
Erythritol levels	rs181823223	T	C	0.117225	-0.108427	0.02309	8167	2.65528e-06	22.0482
Erythritol levels	rs71480323	A	G	0.123767	-0.101121	0.0217504	8167	3.33285e-06	21.612
Erythritol levels	rs9596367	C	G	0.443135	0.0684595	0.0146956	8167	3.18537e-06	21.699
Erythritol levels	rs12893100	T	C	0.291436	0.0721428	0.016087	8167	7.30705e-06	20.1086
Erythritol levels	rs1865475	A	G	0.0960525	-0.115293	0.0244655	8167	2.44721e-06	22.2047
Erythritol levels	rs35208507	G	A	0.310554	-0.0782231	0.0157699	8167	7.03917e-07	24.6014
Erythritol levels	rs148188291	G	A	0.011176	-0.312133	0.068299	8167	4.87511e-06	20.8832
Erythritol levels	rs117113173	G	C	0.0231459	0.245682	0.0480425	8167	3.15665e-07	26.1482
Erythritol levels	rs111274172	T	A	0.0193261	0.264806	0.0526607	8167	4.94236e-07	25.283
Erythritol levels	rs150921780	T	C	0.0444772	0.157491	0.0349348	8167	6.53989e-06	20.3208
Hexanoylcarnitine levels	rs75690409	G	A	0.0166198	0.265713	0.0585954	8242	5.76827e-06	20.5611
Hexanoylcarnitine levels	rs149556176	C	T	0.0140408	0.49122	0.0634609	8242	9.90147e-15	59.9083
Hexanoylcarnitine levels	rs2185152	T	C	0.30837	-0.4316	0.0153412	8242	3.83431e-174	791.392
Hexanoylcarnitine levels	rs36012907	T	C	0.0917344	0.128382	0.0263672	8242	1.1217e-06	23.7043
Hexanoylcarnitine levels	rs16865990	G	A	0.0100306	-0.356033	0.075046	8242	2.09342e-06	22.5047
Hexanoylcarnitine levels	rs1391967	G	A	0.187232	-0.0857333	0.0192503	8242	8.44367e-06	19.8322
Hexanoylcarnitine levels	rs62290256	G	A	0.0584841	0.16173	0.0316506	8242	3.22408e-07	26.1075
Hexanoylcarnitine levels	rs17843902	C	T	0.296766	-0.0833266	0.0163535	8242	3.48112e-07	25.9593
Hexanoylcarnitine levels	rs2631367	G	C	0.522736	0.104741	0.0149388	8242	2.35995e-12	49.1529
Hexanoylcarnitine levels	rs77010315	A	C	0.012084	-0.452358	0.0682548	8242	3.41446e-11	43.9183
Hexanoylcarnitine levels	rs80254170	G	A	0.0750547	-0.124082	0.0280817	8242	9.93375e-06	19.5217
Hexanoylcarnitine levels	rs662138	G	C	0.175323	-0.133922	0.0196516	8242	9.4375e-12	46.4361
Hexanoylcarnitine levels	rs28540007	C	T	0.0204714	-0.239621	0.0526059	8242	5.23824e-06	20.7457
Hexanoylcarnitine levels	rs144724596	T	C	0.00693515	0.433125	0.0902822	8242	1.60694e-06	23.0128
Hexanoylcarnitine levels	rs1171617	T	G	0.768951	0.152178	0.0180475	8242	3.39535e-17	71.0914
Hexanoylcarnitine levels	rs141882839	A	G	0.0257707	0.245572	0.0474263	8242	2.24314e-07	26.8081
Hexanoylcarnitine levels	rs73001574	T	G	0.0158023	-0.28157	0.0599701	8242	2.66386e-06	22.042
Hexanoylcarnitine levels	rs898847	C	T	0.745109	0.0835404	0.0173534	8242	1.47896e-06	23.1724
Hexanoylcarnitine levels	rs117548628	A	G	0.016033	-0.272418	0.059426	8242	4.55821e-06	21.0119
Hexanoylcarnitine levels	rs117138561	T	C	0.00930119	0.345285	0.0773593	8242	8.06713e-06	19.9195
Hexanoylcarnitine levels	rs75586607	C	G	0.0401487	-0.175199	0.0387011	8242	5.98379e-06	20.491
Hexanoylcarnitine levels	rs7496462	G	C	0.498842	0.0678033	0.0149904	8242	6.0939e-06	20.4561
Hexanoylcarnitine levels	rs111262693	T	G	0.0770636	0.12919	0.0283986	8242	5.38593e-06	20.6924
Hexanoylcarnitine levels	rs117907282	A	G	0.00977772	-0.347706	0.0762	8242	5.04116e-06	20.8191
Hexanoylcarnitine levels	rs113915691	A	G	0.0625	-0.138771	0.0308238	8242	6.72984e-06	20.2662
Acetylcarnitine (c2) levels	rs188283366	C	G	0.0182415	0.246081	0.0556954	8262	9.94627e-06	19.5193
Acetylcarnitine (c2) levels	rs61765007	A	G	0.0168485	-0.261156	0.0577114	8262	6.03371e-06	20.475
Acetylcarnitine (c2) levels	rs1839212	A	G	0.0267879	0.217408	0.0465305	8262	2.97752e-06	21.8285
Acetylcarnitine (c2) levels	rs16865990	G	A	0.0100037	-0.373578	0.0752289	8262	6.83895e-07	24.657
Acetylcarnitine (c2) levels	rs139264311	G	A	0.0214303	-0.230906	0.0521359	8262	9.47e-06	19.613
Acetylcarnitine (c2) levels	rs138268157	G	A	0.124725	0.107567	0.0225861	8262	1.91198e-06	22.679
Acetylcarnitine (c2) levels	rs112845131	T	A	0.0127551	0.324374	0.0667607	8262	1.18128e-06	23.6047
Acetylcarnitine (c2) levels	rs115362213	C	G	0.0124863	-0.313614	0.0668907	8262	2.75273e-06	21.9789
Acetylcarnitine (c2) levels	rs79958740	T	A	0.0327749	0.204757	0.042295	8262	1.2908e-06	23.434
Acetylcarnitine (c2) levels	rs55640226	C	T	0.0695067	-0.129357	0.02927	8262	9.8956e-06	19.5291
Acetylcarnitine (c2) levels	rs2631367	G	C	0.522496	0.111841	0.0149618	8262	7.71344e-14	55.8704
Acetylcarnitine (c2) levels	rs74823953	T	C	0.0122617	-0.407734	0.0679719	8262	1.99076e-09	35.9785
Acetylcarnitine (c2) levels	rs662138	G	C	0.174893	-0.0872708	0.0197411	8262	9.83515e-06	19.5408
Acetylcarnitine (c2) levels	rs117508585	A	G	0.0165029	-0.264148	0.0589634	8262	7.46889e-06	20.0668
Acetylcarnitine (c2) levels	rs114798927	C	T	0.109753	-0.112961	0.0241021	8262	2.77555e-06	21.9632
Acetylcarnitine (c2) levels	rs10984356	G	A	0.0562768	-0.144742	0.0326654	8262	9.37703e-06	19.6318
Acetylcarnitine (c2) levels	rs1171617	T	G	0.769509	0.215613	0.0180295	8262	5.83405e-33	142.998
Acetylcarnitine (c2) levels	rs898847	C	T	0.744526	0.0867139	0.0173494	8262	5.78998e-07	24.9779
Acetylcarnitine (c2) levels	rs71454277	A	C	0.0165103	0.264081	0.0592975	8262	8.44882e-06	19.8312
Acetylcarnitine (c2) levels	rs55796423	A	G	0.153893	-0.0969525	0.0211135	8262	4.39083e-06	21.0836
Acetylcarnitine (c2) levels	rs146712130	A	T	0.00766517	-0.378122	0.0854937	8262	9.74293e-06	19.5588
Acetylcarnitine (c2) levels	rs147882444	A	G	0.0159815	-0.269681	0.060037	8262	7.05834e-06	20.1748
Acetylcarnitine (c2) levels	rs273694	C	T	0.561411	0.070912	0.0154344	8262	4.33962e-06	21.1061
Iminodiacetate (IDA) levels	rs114028922	C	G	0.0527863	0.163864	0.034701	8213	2.3335e-06	22.2962
Iminodiacetate (IDA) levels	rs7626271	G	T	0.0385131	0.19145	0.0401333	8213	1.83911e-06	22.7535
Iminodiacetate (IDA) levels	rs114863573	C	G	0.0344806	0.194631	0.0426242	8213	4.96626e-06	20.8477
Iminodiacetate (IDA) levels	rs79787801	A	G	0.0767671	-0.132657	0.0290533	8213	4.97162e-06	20.8457
Iminodiacetate (IDA) levels	rs72704298	G	A	0.0793087	0.13257	0.0283537	8213	2.93147e-06	21.8584
Iminodiacetate (IDA) levels	rs2094632	G	A	0.687099	0.0781469	0.0165713	8213	2.40778e-06	22.236
Iminodiacetate (IDA) levels	rs183008696	T	C	0.00942819	-0.371462	0.0801958	8213	3.62269e-06	21.4522
Iminodiacetate (IDA) levels	rs113401873	A	G	0.0189542	0.249914	0.0558793	8213	7.73518e-06	19.9998
Iminodiacetate (IDA) levels	rs117448509	T	G	0.0184259	0.255763	0.0576024	8213	8.98944e-06	19.7125
Iminodiacetate (IDA) levels	rs185717944	C	T	0.0134277	0.292572	0.0661473	8213	9.73254e-06	19.5609
Iminodiacetate (IDA) levels	rs11617909	T	G	0.0654711	-0.145908	0.0312604	8213	3.04888e-06	21.7829
Iminodiacetate (IDA) levels	rs2967159	C	T	0.782601	-0.0892336	0.0188596	8213	2.229e-06	22.3841
Iminodiacetate (IDA) levels	rs6506794	G	A	0.709199	0.0767115	0.017227	8213	8.46853e-06	19.8266
Iminodiacetate (IDA) levels	rs2386992	G	A	0.639974	0.0750443	0.0165301	8213	5.62943e-06	20.6078
Iminodiacetate (IDA) levels	rs1080669	T	C	0.13774	-0.105885	0.0228046	8213	3.43172e-06	21.5561
Iminodiacetate (IDA) levels	rs55746532	C	G	0.0667562	0.137732	0.0307764	8213	7.63206e-06	20.0254
Iminodiacetate (IDA) levels	rs1297208	C	T	0.425451	-0.072164	0.0161009	8213	7.39509e-06	20.0857
Cysteine s-sulfate levels	rs118066821	T	C	0.00438703	0.512744	0.114808	8229	7.96642e-06	19.9436
Cysteine s-sulfate levels	rs17028699	T	C	0.117487	0.121118	0.0238351	8229	3.74526e-07	25.8185
Cysteine s-sulfate levels	rs141988268	T	C	0.0427283	0.175911	0.0377752	8229	3.21176e-06	21.683
Cysteine s-sulfate levels	rs949204	A	C	0.94961	-0.176649	0.0351179	8229	4.90051e-07	25.2995
Cysteine s-sulfate levels	rs140798906	C	T	0.0100012	0.347447	0.0757916	8229	4.55625e-06	21.0127
Cysteine s-sulfate levels	rs140247774	T	C	0.0686635	0.132671	0.0299172	8229	9.22343e-06	19.6633
Cysteine s-sulfate levels	rs9349017	A	G	0.472072	-0.0681227	0.0153172	8229	8.68962e-06	19.7775
Cysteine s-sulfate levels	rs9294112	T	C	0.584908	-0.0795037	0.0157707	8229	4.62576e-07	25.4109
Cysteine s-sulfate levels	rs17417592	G	C	0.0330634	0.193215	0.0425574	8229	5.62253e-06	20.61
Cysteine s-sulfate levels	rs73391840	G	A	0.0914345	0.115721	0.026184	8229	9.89213e-06	19.5299
Cysteine s-sulfate levels	rs67512771	T	C	0.0091838	0.37189	0.0780862	8229	1.91153e-06	22.6792
Cysteine s-sulfate levels	rs117215329	T	C	0.0194204	0.256704	0.0545011	8229	2.47623e-06	22.1821
Cysteine s-sulfate levels	rs11244781	T	C	0.212774	-0.0897994	0.0184176	8229	1.08402e-06	23.7699
Cysteine s-sulfate levels	rs76358805	C	A	0.0116945	-0.325404	0.0704489	8229	3.85587e-06	21.3326
Cysteine s-sulfate levels	rs8024193	C	T	0.0810205	-0.125484	0.0278703	8229	6.71831e-06	20.2694
Cysteine s-sulfate levels	rs11641923	A	G	0.0178239	-0.265368	0.0576737	8229	4.2008e-06	21.1684
Cysteine s-sulfate levels	rs62047236	T	A	0.0650202	-0.136092	0.0307172	8229	9.40171e-06	19.6268
Cysteine s-sulfate levels	rs117088632	A	G	0.018654	0.266147	0.0563105	8229	2.2851e-06	22.3363
Oxalate (ethanedioate) levels	rs72680272	A	G	0.00830054	-0.375643	0.0834787	8181	6.79963e-06	20.2463
Oxalate (ethanedioate) levels	rs647667	C	T	0.0593252	0.154413	0.032158	8181	1.57324e-06	23.0535
Oxalate (ethanedioate) levels	rs2809969	C	T	0.527785	-0.0696477	0.0152303	8181	4.80833e-06	20.9095
Oxalate (ethanedioate) levels	rs4953634	C	T	0.0551434	-0.14883	0.0330522	8181	6.70402e-06	20.2734
Oxalate (ethanedioate) levels	rs149160598	A	G	0.0163097	-0.305518	0.06029	8181	4.0311e-07	25.6762
Oxalate (ethanedioate) levels	rs1449141	C	A	0.282847	-0.0813985	0.0168357	8181	1.33222e-06	23.3732
Oxalate (ethanedioate) levels	rs1428090	C	A	0.418005	0.0721094	0.015174	8181	2.01246e-06	22.5803
Oxalate (ethanedioate) levels	rs62381198	T	C	0.0258779	-0.317886	0.047336	8181	1.87386e-11	45.0927
Oxalate (ethanedioate) levels	rs77555311	G	A	0.0319735	-0.201776	0.0431392	8181	2.90649e-06	21.8747
Oxalate (ethanedioate) levels	rs145121944	G	A	0.016564	-0.283903	0.059632	8181	1.92708e-06	22.6636
Oxalate (ethanedioate) levels	rs71537594	A	T	0.0668165	0.141263	0.0305075	8181	3.64911e-06	21.4383
Oxalate (ethanedioate) levels	rs11766962	C	T	0.225534	-0.0829003	0.0183671	8181	6.3762e-06	20.3694
Oxalate (ethanedioate) levels	rs1995538	T	G	0.993275	0.445516	0.0952138	8181	2.88123e-06	21.8914
Oxalate (ethanedioate) levels	rs145856286	A	G	0.00822591	-0.386166	0.084412	8181	4.76737e-06	20.926
Oxalate (ethanedioate) levels	rs112268836	C	T	0.0100841	0.356864	0.0757379	8181	2.45505e-06	22.1986
Oxalate (ethanedioate) levels	rs77008478	G	A	0.0114541	-0.327811	0.0709191	8181	3.79474e-06	21.3633
Oxalate (ethanedioate) levels	rs117338371	A	G	0.0360945	-0.179984	0.0406824	8181	9.68362e-06	19.5705
Oxalate (ethanedioate) levels	rs4931397	C	G	0.658574	-0.0728101	0.015977	8181	5.18472e-06	20.7654
Oxalate (ethanedioate) levels	rs117461873	A	G	0.0177566	-0.269529	0.0573321	8181	2.58663e-06	22.0985
Oxalate (ethanedioate) levels	rs113601767	G	A	0.0407475	-0.172283	0.0380449	8181	5.94281e-06	20.504
Oxalate (ethanedioate) levels	rs373578	G	A	0.71786	0.0789206	0.0174154	8181	5.85235e-06	20.5334
Oxalate (ethanedioate) levels	rs7147156	G	T	0.0106939	-0.329118	0.0738218	8181	8.26213e-06	19.8738
Oxalate (ethanedioate) levels	rs756874	G	A	0.36637	0.0765485	0.0157536	8181	1.17904e-06	23.6081
Oxalate (ethanedioate) levels	rs7201295	A	G	0.5299	-0.0681407	0.0152759	8181	8.17016e-06	19.8951
Oxalate (ethanedioate) levels	rs274865	C	G	0.00422587	-0.524705	0.117158	8181	7.51337e-06	20.0555
Oxalate (ethanedioate) levels	rs7478	A	T	0.422473	0.0709586	0.0154749	8181	4.53115e-06	21.0233
Oxalate (ethanedioate) levels	rs5760895	C	G	0.73044	-0.0832651	0.0173935	8181	1.69167e-06	22.9139
DHEAS levels	rs75561083	T	C	0.0154268	0.242916	0.054521	8228	8.37117e-06	19.8487
DHEAS levels	rs141370991	T	C	0.0202811	-0.239218	0.047825	8228	5.67554e-07	25.0164
DHEAS levels	rs10494157	A	G	0.130411	-0.0929436	0.0200791	8228	3.6767e-06	21.4239
DHEAS levels	rs6428823	T	C	0.55575	-0.0632887	0.0136504	8228	3.54539e-06	21.4936
DHEAS levels	rs12049195	A	G	0.530054	-0.0676001	0.013428	8228	4.79693e-07	25.3407
DHEAS levels	rs76895520	A	G	0.0212325	-0.209452	0.0467287	8228	7.38458e-06	20.0886
DHEAS levels	rs76768009	A	G	0.0366166	-0.157937	0.0356743	8228	9.54667e-06	19.5977
DHEAS levels	rs1807334	A	G	0.39813	0.0626868	0.0137327	8228	4.99998e-06	20.8347
DHEAS levels	rs79317397	A	C	0.0168108	0.244906	0.0523019	8228	2.83319e-06	21.9236
DHEAS levels	rs534538291	T	A	0.0116931	-0.272644	0.0615537	8228	9.45105e-06	19.6169
DHEAS levels	rs2055157	A	C	0.194049	0.0781081	0.0170109	8228	4.39749e-06	21.0807
DHEAS levels	rs7687817	T	C	0.0931987	-0.106706	0.0229306	8228	3.26475e-06	21.6518
DHEAS levels	rs28552668	T	C	0.0716572	-0.118903	0.0260291	8228	4.92176e-06	20.8648
DHEAS levels	rs71606471	A	C	0.102975	-0.106227	0.0221505	8228	1.62119e-06	22.9959
DHEAS levels	rs150374297	C	T	0.0142327	-0.262352	0.0570627	8228	4.27386e-06	21.1354
DHEAS levels	rs784420	G	A	0.295093	0.0838184	0.0147829	8228	1.4283e-08	32.1445
DHEAS levels	rs6879686	T	G	0.226271	-0.0722897	0.0159968	8228	6.21329e-06	20.419
DHEAS levels	rs115255559	G	A	0.0207872	-0.219727	0.0473768	8228	3.52033e-06	21.5071
DHEAS levels	rs12658172	C	G	0.157186	-0.0827423	0.0185432	8228	8.11423e-06	19.9082
DHEAS levels	rs142295380	G	C	0.00832313	-0.334977	0.07333	8228	4.92228e-06	20.8648
DHEAS levels	rs10806995	G	A	0.298428	-0.066028	0.0147689	8228	7.79437e-06	19.9851
DHEAS levels	rs150328525	G	T	0.0102314	-0.304863	0.0670882	8228	5.51403e-06	20.6474
DHEAS levels	rs10228292	T	C	0.694808	-0.0656196	0.0146309	8228	7.29186e-06	20.1128
DHEAS levels	rs148982377	C	T	0.034138	-0.423259	0.036657	8228	7.69047e-31	133.305
DHEAS levels	rs75280042	T	A	0.027998	-0.18074	0.0404238	8228	7.78068e-06	19.9886
DHEAS levels	rs529543	G	T	0.472088	-0.063488	0.0135612	8228	2.84683e-06	21.9146
DHEAS levels	rs7855576	A	C	0.275256	-0.0714674	0.0153476	8228	3.21491e-06	21.6811
DHEAS levels	rs9420589	T	G	0.426402	-0.0649842	0.0136215	8228	1.83585e-06	22.7569
DHEAS levels	rs191866531	A	G	0.00830281	0.330692	0.0738705	8228	7.58235e-06	20.0379
DHEAS levels	rs149982314	T	C	0.00935551	-0.363745	0.0702108	8228	2.20999e-07	26.837
DHEAS levels	rs144814135	A	G	0.016918	-0.240898	0.0527017	8228	4.85472e-06	20.8912
DHEAS levels	rs706795	C	T	0.586905	0.061449	0.0137477	8228	7.82999e-06	19.9764
DHEAS levels	rs659964	C	G	0.148687	0.0885708	0.0189306	8228	2.88691e-06	21.8877
DHEAS levels	rs955783	T	A	0.403268	0.0868089	0.013953	8228	4.9235e-10	38.7026
DHEAS levels	rs9594288	T	C	0.032861	-0.166697	0.0370828	8228	6.94836e-06	20.2049
DHEAS levels	rs74041508	C	G	0.180671	-0.0784005	0.0175303	8228	7.73864e-06	19.9989
DHEAS levels	rs148769396	A	G	0.0165486	0.233356	0.0527685	8228	9.76712e-06	19.554
DHEAS levels	rs698050	T	A	0.490868	0.0610578	0.0134287	8228	5.44616e-06	20.671
DHEAS levels	rs560835392	A	C	0.0236755	0.205827	0.0442233	8228	3.25145e-06	21.6596
DHEAS levels	rs7173332	C	G	0.159577	-0.0880801	0.0187018	8228	2.48066e-06	22.1787
DHEAS levels	rs1111474	T	C	0.07087	0.116247	0.0261944	8228	9.08649e-06	19.6922
DHEAS levels	rs76294479	T	C	0.0689424	0.158165	0.0264428	8228	2.21235e-09	35.7728
DHEAS levels	rs117833456	C	T	0.0328131	-0.170218	0.038225	8228	8.46599e-06	19.8273
DHEAS levels	rs184445849	T	C	0.0156827	0.251175	0.0545375	8228	4.11386e-06	21.2085
DHEAS levels	rs212100	C	T	0.838122	0.0852723	0.0183422	8228	3.33596e-06	21.6103
DHEAS levels	rs73172224	A	G	0.130576	-0.0937382	0.0200897	8228	3.07145e-06	21.7688
3-hydroxymyristate levels	rs79142871	A	G	0.0181089	0.26564	0.0560876	8235	2.17794e-06	22.4285
3-hydroxymyristate levels	rs1532133	T	C	0.596884	0.0760915	0.015638	8235	1.13986e-06	23.6732
3-hydroxymyristate levels	rs78085499	T	C	0.0268595	-0.211076	0.04588	8235	4.21265e-06	21.163
3-hydroxymyristate levels	rs1202578	C	T	0.680472	0.0731406	0.0159922	8235	4.79593e-06	20.9145
3-hydroxymyristate levels	rs62273444	A	G	0.0560991	-0.14935	0.0327843	8235	5.22542e-06	20.7504
3-hydroxymyristate levels	rs62294541	G	A	0.100994	-0.113994	0.0251764	8235	5.96007e-06	20.4986
3-hydroxymyristate levels	rs73240592	A	G	0.0402165	0.174041	0.0381644	8235	5.10829e-06	20.7938
3-hydroxymyristate levels	rs710362	G	A	0.0488731	0.15381	0.0344818	8235	8.17257e-06	19.8947
3-hydroxymyristate levels	rs79795772	A	G	0.0397582	-0.174959	0.0384746	8235	5.43169e-06	20.6762
3-hydroxymyristate levels	rs116213385	T	A	0.0192637	-0.262717	0.0544687	8235	1.41226e-06	23.2611
3-hydroxymyristate levels	rs146643611	T	C	0.0528314	-0.155008	0.0342988	8235	6.203e-06	20.422
3-hydroxymyristate levels	rs79589895	G	A	0.0345417	-0.186161	0.0413001	8235	6.55911e-06	20.3153
3-hydroxymyristate levels	rs1349890	C	T	0.585445	-0.0701093	0.0152337	8235	4.17938e-06	21.1781
3-hydroxymyristate levels	rs760201	G	C	0.864839	-0.0998802	0.0222488	8235	7.14789e-06	20.1508
3-hydroxymyristate levels	rs2026430	C	T	0.493468	0.0671379	0.0150019	8235	7.63079e-06	20.0258
3-hydroxymyristate levels	rs7897119	C	G	0.217008	-0.081237	0.0183753	8235	9.82546e-06	19.5428
3-hydroxymyristate levels	rs141436484	G	A	0.119489	0.104455	0.0231002	8235	6.13085e-06	20.4444
3-hydroxymyristate levels	rs117536244	C	G	0.0446178	-0.163754	0.0366023	8235	7.68215e-06	20.0131
3-hydroxymyristate levels	rs989915	T	C	0.355787	0.0725937	0.0158887	8235	4.90291e-06	20.8722
3-hydroxymyristate levels	rs139938935	G	A	0.00577789	-0.482894	0.0991018	8235	1.10077e-06	23.7404
Homoarginine levels	rs34544263	G	A	0.156	0.0949334	0.0196998	8265	1.44274e-06	23.22
Homoarginine levels	rs182871603	A	T	0.0116236	-0.318919	0.0667807	8265	1.79152e-06	22.8038
Homoarginine levels	rs76205147	A	G	0.0473369	0.157438	0.0338988	8265	3.4115e-06	21.5674
Homoarginine levels	rs114917035	C	T	0.0158173	0.256701	0.0579099	8265	9.30326e-06	19.647
Homoarginine levels	rs1047891	A	C	0.30892	-0.267116	0.0153908	8265	1.78869e-67	301.179
Homoarginine levels	rs56162443	T	C	0.0207348	0.224743	0.0501508	8265	7.41753e-06	20.08
Homoarginine levels	rs13135092	G	A	0.0821459	0.152931	0.0264972	8265	7.85199e-09	33.3072
Homoarginine levels	rs72682642	A	G	0.0141767	0.270338	0.0607798	8265	8.67438e-06	19.7808
Homoarginine levels	rs37370	T	C	0.901746	-0.148341	0.0241157	8265	7.68912e-10	37.8329
Homoarginine levels	rs62356073	A	G	0.572483	-0.0640151	0.0144212	8265	9.03957e-06	19.702
Homoarginine levels	rs3095953	C	G	0.0296862	0.193999	0.0422424	8265	4.37914e-06	21.0887
Homoarginine levels	rs2282841	T	C	0.0908258	-0.111787	0.0248422	8265	6.7991e-06	20.2465
Homoarginine levels	rs2781666	T	G	0.306099	0.0781012	0.0156659	8265	6.18211e-07	24.8515
Homoarginine levels	rs6465696	T	A	0.715181	-0.0725476	0.0159349	8265	5.29458e-06	20.725
Homoarginine levels	rs1805120	A	G	0.208831	0.080005	0.017912	8265	7.9486e-06	19.9477
Homoarginine levels	rs7818335	T	C	0.374752	0.070804	0.0152316	8265	3.34365e-06	21.6059
Homoarginine levels	rs6473159	G	A	0.309664	-0.0704143	0.0159401	8265	9.98805e-06	19.5113
Homoarginine levels	rs4978869	T	G	0.114664	0.103357	0.0233778	8265	9.81663e-06	19.5443
Homoarginine levels	rs144260607	T	C	0.0232219	-0.22454	0.0480399	8265	2.95348e-06	21.8439
Homoarginine levels	rs146683630	C	G	0.0313998	0.221959	0.0415351	8265	9.09753e-08	28.5537
Homoarginine levels	rs77433867	A	G	0.041419	-0.161837	0.0362499	8265	8.0266e-06	19.9292
Homoarginine levels	rs12306007	T	C	0.142736	0.102709	0.0203538	8265	4.50717e-07	25.4609
Homoarginine levels	rs116979298	T	C	0.0342134	-0.181869	0.0396223	8265	4.43094e-06	21.0662
Homoarginine levels	rs72623915	T	C	0.256124	0.355872	0.0159872	8265	9.06726e-110	495.439
Homoarginine levels	rs35770448	C	T	0.0983936	0.107377	0.0239115	8265	7.1021e-06	20.1631
Homoarginine levels	rs145421014	A	C	0.00976823	-0.365808	0.0735614	8265	6.59824e-07	24.726
Homoarginine levels	rs75686987	A	G	0.0231924	0.222727	0.0475935	8265	2.87192e-06	21.8977
Homoarginine levels	rs117313139	G	C	0.0676518	0.134168	0.0291427	8265	4.14837e-06	21.1927
Homoarginine levels	rs72629024	G	C	0.144402	0.117324	0.0206359	8265	1.30499e-08	32.3202
1-oleoylglycerol (18:1) levels	rs17268364	A	G	0.48861	0.0723971	0.0154591	8225	2.82508e-06	21.9291
1-oleoylglycerol (18:1) levels	rs111879519	T	C	0.0645021	0.145409	0.0319907	8225	5.48463e-06	20.6577
1-oleoylglycerol (18:1) levels	rs146172549	C	T	0.0112401	0.336766	0.073153	8225	4.15278e-06	21.1904
1-oleoylglycerol (18:1) levels	rs139236053	A	G	0.0546626	-0.153174	0.0343176	8225	8.06581e-06	19.9197
1-oleoylglycerol (18:1) levels	rs114951684	G	A	0.0284632	-0.210068	0.0464803	8225	6.19855e-06	20.4235
1-oleoylglycerol (18:1) levels	rs73808455	T	C	0.0155412	-0.284414	0.0626028	8225	5.54179e-06	20.6377
1-oleoylglycerol (18:1) levels	rs114881696	G	C	0.0340631	-0.236439	0.0431018	8225	4.12084e-08	30.0881
1-oleoylglycerol (18:1) levels	rs57601959	A	G	0.0479494	-0.1601	0.0361169	8225	9.30054e-06	19.6476
1-oleoylglycerol (18:1) levels	rs72691394	A	G	0.0434942	-0.179559	0.0377023	8225	1.91162e-06	22.6791
1-oleoylglycerol (18:1) levels	rs57994859	T	C	0.0712719	-0.132592	0.0299211	8225	9.36269e-06	19.6348
1-oleoylglycerol (18:1) levels	rs158835	G	C	0.711772	-0.0823376	0.0177145	8225	3.351e-06	21.6016
1-oleoylglycerol (18:1) levels	rs6936055	T	C	0.198453	0.0987167	0.0197112	8225	5.49579e-07	25.0785
1-oleoylglycerol (18:1) levels	rs10484587	T	A	0.225289	0.0879266	0.0185495	8225	2.13594e-06	22.4659
1-oleoylglycerol (18:1) levels	rs11754776	T	C	0.0511945	-0.166115	0.0349798	8225	2.04541e-06	22.5492
1-oleoylglycerol (18:1) levels	rs145557517	A	G	0.0140078	0.307537	0.0656048	8225	2.76271e-06	21.9721
1-oleoylglycerol (18:1) levels	rs13238458	A	G	0.0702811	0.132235	0.0299019	8225	9.76565e-06	19.5543
1-oleoylglycerol (18:1) levels	rs17091891	C	T	0.120786	-0.121888	0.0235862	8225	2.36911e-07	26.7026
1-oleoylglycerol (18:1) levels	rs7860081	C	G	0.600899	0.0735683	0.0159584	8225	4.0268e-06	21.2496
1-oleoylglycerol (18:1) levels	rs76911913	G	C	0.00531006	-0.487266	0.105694	8225	4.02335e-06	21.251
1-oleoylglycerol (18:1) levels	rs4962425	C	T	0.816855	0.09298	0.0206509	8225	6.71679e-06	20.2697
1-oleoylglycerol (18:1) levels	rs10840108	C	T	0.247676	-0.0836033	0.0178556	8225	2.83835e-06	21.9202
1-oleoylglycerol (18:1) levels	rs117245363	A	G	0.015133	0.292341	0.063964	8225	4.86807e-06	20.886
1-oleoylglycerol (18:1) levels	rs2514155	A	C	0.0501707	-0.156688	0.0353748	8225	9.45092e-06	19.6169
1-oleoylglycerol (18:1) levels	rs964184	C	G	0.868688	-0.177523	0.0228868	8225	8.72352e-15	60.157
1-oleoylglycerol (18:1) levels	rs186740048	A	G	0.0131675	-0.302981	0.0677624	8225	7.77696e-06	19.9894
1-oleoylglycerol (18:1) levels	rs72676439	T	C	0.0720927	-0.132926	0.0300848	8225	9.9444e-06	19.5197
1-oleoylglycerol (18:1) levels	rs72785421	C	T	0.151933	-0.119237	0.0216956	8225	3.88734e-08	30.2013
1-oleoylglycerol (18:1) levels	rs74732810	G	T	0.0560059	0.158428	0.0340249	8225	3.22032e-06	21.6779
1-oleoylglycerol (18:1) levels	rs191591925	T	C	0.00658296	-0.439326	0.0960845	8225	4.82431e-06	20.9033
1-oleoylglycerol (18:1) levels	rs148125219	A	G	0.0102128	-0.355434	0.0766211	8225	3.50346e-06	21.5163
1-oleoylglycerol (18:1) levels	rs112871012	A	G	0.090405	0.158987	0.0280316	8225	1.41377e-08	32.1643
1-oleoylglycerol (18:1) levels	rs1002762	G	A	0.199319	-0.0958491	0.0195747	8225	9.75154e-07	23.9736
3-methyl-2-oxobutyrate levels	rs6437111	T	C	0.623194	-0.0730313	0.0157383	8254	3.47833e-06	21.5303
3-methyl-2-oxobutyrate levels	rs71434672	T	A	0.059628	-0.151261	0.0321585	8254	2.55614e-06	22.1213
3-methyl-2-oxobutyrate levels	rs111838413	C	A	0.0397048	0.177437	0.0395399	8254	7.20534e-06	20.1356
3-methyl-2-oxobutyrate levels	rs1129043	C	T	0.576689	-0.131118	0.0157904	8254	1.0096e-16	68.9423
3-methyl-2-oxobutyrate levels	rs201357853	T	A	0.0884499	0.121602	0.0269646	8254	6.49219e-06	20.3348
3-methyl-2-oxobutyrate levels	rs77095091	C	T	0.0767112	-0.127049	0.0286851	8254	9.4633e-06	19.6145
3-methyl-2-oxobutyrate levels	rs13270448	G	A	0.544031	0.0763145	0.0154491	8254	7.82209e-07	24.3981
3-methyl-2-oxobutyrate levels	rs117675121	C	A	0.0253311	-0.227121	0.0489585	8254	3.5002e-06	21.5182
3-methyl-2-oxobutyrate levels	rs16922127	T	G	0.0645772	-0.1432	0.0311068	8254	4.15425e-06	21.1896
3-methyl-2-oxobutyrate levels	rs146964322	G	C	0.064898	0.148688	0.0310762	8254	1.7131e-06	22.8899
3-methyl-2-oxobutyrate levels	rs80195374	A	G	0.0222903	0.250371	0.0520121	8254	1.48156e-06	23.169
3-methyl-2-oxobutyrate levels	rs139282082	G	T	0.026625	-0.212207	0.0476843	8254	8.57655e-06	19.8023
3-methyl-2-oxobutyrate levels	rs34402912	C	T	0.0826055	0.124264	0.0280235	8254	9.23719e-06	19.6604
3-methyl-2-oxobutyrate levels	rs141436484	G	A	0.119625	0.119976	0.0236236	8254	3.8016e-07	25.7896
3-methyl-2-oxobutyrate levels	rs45591543	T	C	0.0164948	0.270085	0.0595489	8254	5.74603e-06	20.5684
3-methyl-2-oxobutyrate levels	rs12894999	A	G	0.813368	-0.0982367	0.0197435	8254	6.50281e-07	24.7541
3-methyl-2-oxobutyrate levels	rs143866653	C	A	0.0236865	-0.233425	0.0502906	8254	3.45833e-06	21.5411
3-methyl-2-oxobutyrate levels	rs76701293	A	G	0.0504492	-0.155826	0.0352527	8254	9.85775e-06	19.5363
3-methyl-2-oxobutyrate levels	rs138447973	C	T	0.0249754	0.225893	0.0498426	8254	5.83912e-06	20.5377
3-methyl-2-oxobutyrate levels	rs9963006	A	G	0.626775	-0.0758529	0.016472	8254	4.1253e-06	21.2031
3-methyl-2-oxobutyrate levels	rs77723081	C	G	0.00654995	-0.423631	0.0948615	8254	7.97744e-06	19.9408
3-methyl-2-oxobutyrate levels	rs77182631	A	G	0.0446725	-0.175305	0.0370791	8254	2.26898e-06	22.35
Tartronate (hydroxymalonate) levels	rs140591764	T	C	0.00599357	-0.477597	0.0988554	8125	1.35664e-06	23.3383
Tartronate (hydroxymalonate) levels	rs151096450	T	G	0.116202	-0.106532	0.0237717	8125	7.41373e-06	20.081
Tartronate (hydroxymalonate) levels	rs11691183	T	C	0.253095	-0.0838852	0.0178203	8125	2.51039e-06	22.1558
Tartronate (hydroxymalonate) levels	rs17688758	C	T	0.0813925	-0.128898	0.0278843	8125	3.78961e-06	21.3658
Tartronate (hydroxymalonate) levels	rs276286	A	G	0.740886	-0.0849521	0.0176539	8125	1.49367e-06	23.1533
Tartronate (hydroxymalonate) levels	rs72801867	G	A	0.149025	0.100144	0.021758	8125	4.17167e-06	21.1816
Tartronate (hydroxymalonate) levels	rs62381620	G	T	0.0302787	-0.288241	0.044521	8125	9.52738e-11	41.911
Tartronate (hydroxymalonate) levels	rs114537403	T	C	0.0185901	0.252179	0.0567582	8125	8.86976e-06	19.7382
Tartronate (hydroxymalonate) levels	rs191390190	A	T	0.0157699	-0.27604	0.0614913	8125	7.15281e-06	20.1495
Tartronate (hydroxymalonate) levels	rs73396929	A	G	0.0935328	-0.125973	0.0262548	8125	1.6017e-06	23.0189
Tartronate (hydroxymalonate) levels	rs11766962	C	T	0.225766	-0.0905032	0.0185917	8125	1.1277e-06	23.6939
Tartronate (hydroxymalonate) levels	rs77181656	T	C	0.0132503	-0.299894	0.0676025	8125	9.15901e-06	19.6769
Tartronate (hydroxymalonate) levels	rs55703838	T	C	0.0104977	-0.339008	0.0749126	8125	6.02846e-06	20.4765
Tartronate (hydroxymalonate) levels	rs9599028	A	T	0.341971	0.0756554	0.0162189	8125	3.0913e-06	21.7562
Tartronate (hydroxymalonate) levels	rs7147156	G	T	0.0105797	-0.343519	0.0755814	8125	5.49298e-06	20.6547
Tartronate (hydroxymalonate) levels	rs191302291	T	G	0.015546	-0.303875	0.061572	8125	8.00349e-07	24.354
Tartronate (hydroxymalonate) levels	rs756874	G	A	0.366768	0.0744947	0.0159556	8125	3.02866e-06	21.7957
Tartronate (hydroxymalonate) levels	rs117550283	C	G	0.0880211	-0.120043	0.0270924	8125	9.38467e-06	19.6302
Tartronate (hydroxymalonate) levels	rs145469088	G	A	0.000563557	-1.63094	0.326085	8125	5.68616e-07	25.0127
Tartronate (hydroxymalonate) levels	rs7478	A	T	0.42224	0.0697161	0.0156795	8125	8.73578e-06	19.7673
Tartronate (hydroxymalonate) levels	rs5996848	G	A	0.73054	-0.0818347	0.0175977	8125	3.31436e-06	21.6227
2,3-dihydroxypyridine levels	rs141568347	A	G	0.00302889	-0.751799	0.158991	6496	2.26109e-06	22.3559
2,3-dihydroxypyridine levels	rs7593862	C	T	0.287106	0.0884833	0.0192158	6496	4.13035e-06	21.2001
2,3-dihydroxypyridine levels	rs2090997	G	A	0.866667	0.114676	0.025701	6496	8.12207e-06	19.9057
2,3-dihydroxypyridine levels	rs11129828	T	C	0.282532	-0.089998	0.0193473	6496	3.29205e-06	21.6351
2,3-dihydroxypyridine levels	rs13114094	C	T	0.16303	0.107882	0.0238873	6496	6.29391e-06	20.3937
2,3-dihydroxypyridine levels	rs149272613	T	C	0.0216199	-0.29112	0.0606833	6496	1.60757e-06	23.0112
2,3-dihydroxypyridine levels	rs62337911	G	A	0.038912	-0.210473	0.0448249	6496	2.66018e-06	22.0438
2,3-dihydroxypyridine levels	rs143968247	A	G	0.0343422	-0.216775	0.0480854	6496	6.54011e-06	20.3201
2,3-dihydroxypyridine levels	rs11167700	T	A	0.169783	-0.109661	0.0234168	6496	2.8268e-06	21.9272
2,3-dihydroxypyridine levels	rs2749675	G	A	0.867047	0.123184	0.0258144	6496	1.82477e-06	22.7676
2,3-dihydroxypyridine levels	rs12216347	G	A	0.376398	-0.0823444	0.0183532	6496	7.23523e-06	20.1269
2,3-dihydroxypyridine levels	rs10250619	C	T	0.782659	-0.0931159	0.0209692	6496	8.97073e-06	19.7159
2,3-dihydroxypyridine levels	rs324498	A	G	0.854157	0.115581	0.0253192	6496	4.99551e-06	20.8356
2,3-dihydroxypyridine levels	rs117746629	T	A	0.0571139	0.173162	0.0376532	6496	4.24806e-06	21.1463
2,3-dihydroxypyridine levels	rs10823297	C	T	0.0308071	-0.224729	0.0497919	6496	6.38084e-06	20.3673
2,3-dihydroxypyridine levels	rs11608247	G	A	0.0459105	0.187711	0.0413816	6496	5.73078e-06	20.573
2,3-dihydroxypyridine levels	rs4898864	A	T	0.576235	-0.0828954	0.0181741	6496	5.08649e-06	20.8012
2,3-dihydroxypyridine levels	rs114966657	C	T	0.103679	0.12724	0.0285633	6496	8.40205e-06	19.841
2,3-dihydroxypyridine levels	rs2472297	T	C	0.255244	0.0925819	0.0198372	6496	3.05496e-06	21.7783
2,3-dihydroxypyridine levels	rs148948230	T	C	0.0189311	-0.282226	0.0636719	6496	9.31424e-06	19.6441
2,3-dihydroxypyridine levels	rs62063470	C	G	0.300507	-0.0855681	0.0193057	6496	9.3244e-06	19.642
2,3-dihydroxypyridine levels	rs8072466	C	T	0.163909	-0.105486	0.0236875	6496	8.45913e-06	19.8282
2,3-dihydroxypyridine levels	rs62095761	A	G	0.266528	0.0959574	0.0199786	6496	1.56307e-06	23.0653
2,3-dihydroxypyridine levels	rs2313588	A	C	0.14737	-0.121021	0.0257748	6496	2.66179e-06	22.0427
3-hydroxyoctanoate levels	rs380155	T	C	0.373797	-0.0732844	0.016032	8182	4.85125e-06	20.8927
3-hydroxyoctanoate levels	rs28415528	A	G	0.317791	-0.119396	0.0162643	8182	2.12024e-13	53.8835
3-hydroxyoctanoate levels	rs186490153	C	T	0.0191531	-0.249031	0.0552526	8182	6.57067e-06	20.3118
3-hydroxyoctanoate levels	rs557560710	C	T	0.0554393	-0.149611	0.0329215	8182	5.50707e-06	20.6497
3-hydroxyoctanoate levels	rs139897381	C	T	0.0129846	-0.327175	0.0666494	8182	9.15899e-07	24.0943
3-hydroxyoctanoate levels	rs150955925	C	G	0.0129156	-0.310408	0.0669674	8182	3.56585e-06	21.4826
3-hydroxyoctanoate levels	rs72668359	C	T	0.0166993	0.276546	0.0589512	8182	2.71731e-06	22.0037
3-hydroxyoctanoate levels	rs188729852	A	G	0.00269773	0.674078	0.145858	8182	3.81031e-06	21.3554
3-hydroxyoctanoate levels	rs79795772	A	G	0.0397664	-0.173164	0.0387063	8182	7.68433e-06	20.0124
3-hydroxyoctanoate levels	rs9314051	A	C	0.697227	0.0804413	0.0164625	8182	1.02727e-06	23.8734
3-hydroxyoctanoate levels	rs7741311	G	T	0.133583	0.100181	0.0220167	8182	5.35886e-06	20.702
3-hydroxyoctanoate levels	rs3752651	C	T	0.207803	-0.0899675	0.0187912	8182	1.68672e-06	22.9197
3-hydroxyoctanoate levels	rs1481852	G	A	0.671158	-0.0810423	0.016792	8182	1.39142e-06	23.2898
3-hydroxyoctanoate levels	rs12554019	G	C	0.186494	-0.0882323	0.0197399	8182	7.83132e-06	19.9762
3-hydroxyoctanoate levels	rs11141654	A	G	0.177262	-0.0960652	0.0199883	8182	1.53924e-06	23.0955
3-hydroxyoctanoate levels	rs34097396	A	G	0.0644806	-0.140136	0.0309815	8182	6.0905e-06	20.457
3-hydroxyoctanoate levels	rs10844993	G	T	0.230317	0.0848311	0.0180197	8182	2.5055e-06	22.1596
3-hydroxyoctanoate levels	rs12878802	C	T	0.426697	-0.0800192	0.0160357	8182	6.03619e-07	24.8977
3-hydroxyoctanoate levels	rs9302385	C	A	0.280432	-0.0890214	0.0167413	8182	1.05216e-07	28.2721
3-hydroxyoctanoate levels	rs9913532	T	C	0.126959	-0.105503	0.0228355	8182	3.8346e-06	21.343
3-hydroxyoctanoate levels	rs11879271	T	C	0.0601982	0.144537	0.0321382	8182	6.88067e-06	20.2238
2-hydroxyoctanoate levels	rs143584067	A	G	0.00760177	0.396114	0.08856	8224	7.71895e-06	20.0038
2-hydroxyoctanoate levels	rs76963882	C	T	0.304345	0.0744623	0.0167632	8224	8.91236e-06	19.7291
2-hydroxyoctanoate levels	rs188077378	A	G	0.0449171	-0.188731	0.0376106	8224	5.22012e-07	25.1775
2-hydroxyoctanoate levels	rs12562486	T	G	0.00231538	0.751021	0.161694	8224	3.40587e-06	21.5707
2-hydroxyoctanoate levels	rs13384756	T	C	0.22539	-0.222042	0.0183336	8224	9.21015e-34	146.663
2-hydroxyoctanoate levels	rs112809733	C	T	0.0976011	0.124361	0.0261853	8224	2.04159e-06	22.5528
2-hydroxyoctanoate levels	rs74637339	A	T	0.0521596	0.218791	0.0348214	8224	3.31624e-10	39.4742
2-hydroxyoctanoate levels	rs35254234	A	G	0.0127548	0.321188	0.0693423	8224	3.62288e-06	21.4521
2-hydroxyoctanoate levels	rs183489175	A	G	0.00721536	0.410446	0.0914386	8224	7.16389e-06	20.1465
2-hydroxyoctanoate levels	rs145729777	A	G	0.00554067	-0.463127	0.104841	8224	9.98927e-06	19.5112
2-hydroxyoctanoate levels	rs1479581	C	T	0.20195	-0.0889207	0.0192855	8224	4.01232e-06	21.2565
2-hydroxyoctanoate levels	rs17470667	G	A	0.0512056	0.162122	0.0351403	8224	3.95805e-06	21.2824
2-hydroxyoctanoate levels	rs35538886	T	C	0.0777478	-0.128883	0.0289318	8224	8.4008e-06	19.8421
2-hydroxyoctanoate levels	rs7029211	T	C	0.983056	-0.27916	0.0605491	8224	4.01752e-06	21.2539
2-hydroxyoctanoate levels	rs12250365	A	G	0.231692	0.0926098	0.0184154	8224	4.93203e-07	25.2871
2-hydroxyoctanoate levels	rs77585588	A	G	0.00748539	0.452071	0.0895868	8224	4.50745e-07	25.4608
2-hydroxyoctanoate levels	rs76619244	C	G	0.0156997	0.297392	0.0628958	8224	2.26377e-06	22.3544
2-hydroxyoctanoate levels	rs72622236	C	A	0.385805	-0.0740584	0.0160837	8224	4.13367e-06	21.1994
2-hydroxyoctanoate levels	rs118085936	C	T	0.0532585	0.159419	0.0348335	8224	4.72581e-06	20.9427
2-hydroxyoctanoate levels	rs6503343	A	G	0.112013	-0.112122	0.0249261	8224	6.85456e-06	20.2311
2-hydroxyoctanoate levels	rs11574581	G	A	0.0848802	0.13927	0.0278489	8224	5.70626e-07	25.0061
2-hydroxyoctanoate levels	rs5748916	A	G	0.324124	-0.0747733	0.0168719	8224	9.34423e-06	19.6387
Homocitrulline levels	rs12726652	A	G	0.201091	-0.0844405	0.0186944	7998	6.27565e-06	20.3997
Homocitrulline levels	rs149152049	A	C	0.0157189	-0.281055	0.0612479	7998	4.45782e-06	21.0545
Homocitrulline levels	rs145449041	C	T	0.00789672	0.390038	0.0861107	7998	5.91258e-06	20.5138
Homocitrulline levels	rs6736866	G	C	0.230629	-0.0830696	0.017955	7998	3.71801e-06	21.4022
Homocitrulline levels	rs17011873	C	T	0.21935	-0.0849946	0.0183847	7998	3.78013e-06	21.3705
Homocitrulline levels	rs149381367	G	C	0.014361	0.283943	0.064014	7998	9.18008e-06	19.6724
Homocitrulline levels	rs12989742	C	T	0.292502	0.0759281	0.0168742	7998	6.80606e-06	20.2444
Homocitrulline levels	rs12490555	T	C	0.233488	0.0844343	0.0180873	7998	3.03917e-06	21.7889
Homocitrulline levels	rs2285761	T	G	0.179857	0.0877735	0.019671	7998	8.11683e-06	19.9076
Homocitrulline levels	rs11741406	A	G	0.193256	0.0865002	0.0193084	7998	7.4667e-06	20.0672
Homocitrulline levels	rs34463406	T	C	0.380988	-0.0690213	0.0155186	7998	8.68172e-06	19.7791
Homocitrulline levels	rs148874160	A	G	0.0209967	0.253526	0.0529352	7998	1.67306e-06	22.9351
Homocitrulline levels	rs148170430	C	T	0.00661459	0.482554	0.0941732	7998	2.98948e-07	26.2532
Homocitrulline levels	rs17544266	C	T	0.0326658	-0.19071	0.042891	7998	8.73215e-06	19.7679
Homocitrulline levels	rs2727548	A	G	0.506254	-0.0708743	0.0154929	7998	4.77032e-06	20.9246
Homocitrulline levels	rs117283049	G	T	0.0356159	-0.187452	0.0408701	7998	4.50664e-06	21.0336
Homocitrulline levels	rs147045808	T	C	0.00949925	0.347563	0.077241	7998	6.80406e-06	20.245
Homocitrulline levels	rs78978101	A	C	0.00969841	-0.348657	0.077783	7998	7.37996e-06	20.0897
Homocitrulline levels	rs8025295	G	C	0.775299	0.0862129	0.0184313	7998	2.90351e-06	21.8765
Homocitrulline levels	rs140994086	T	C	0.0261017	0.211726	0.0469464	7998	6.48399e-06	20.3371
Homocitrulline levels	rs929300	T	C	0.0348954	0.186096	0.0415711	7998	7.58545e-06	20.0372
Homocitrulline levels	rs138767120	G	C	0.0298171	-0.208734	0.0445316	7998	2.76799e-06	21.9683
Homocitrulline levels	rs3211568	A	G	0.192497	0.08928	0.0193344	7998	3.88059e-06	21.3203
Homocitrulline levels	rs74251908	T	C	0.034294	0.197529	0.0418217	7998	2.32261e-06	22.3051
Homocitrulline levels	rs4390625	G	A	0.740662	-0.0943027	0.0172638	7998	4.69609e-08	29.8347
Homocitrulline levels	rs61197953	C	T	0.420836	0.0706504	0.0154811	7998	5.02737e-06	20.8243
Homocitrulline levels	rs75459253	A	G	0.028192	0.224504	0.0458815	7998	9.92442e-07	23.9397
Homocitrulline levels	rs200399858	T	C	0.507921	-0.120814	0.0151785	7998	1.72668e-15	63.3465
Homocitrulline levels	rs8101881	T	C	0.606808	0.254197	0.0152966	7998	5.17004e-62	276.119
Indoleacetate levels	rs2999546	T	G	0.637541	0.0721966	0.0158469	8208	5.2164e-06	20.7535
Indoleacetate levels	rs4584428	T	G	0.11603	0.109808	0.0239353	8208	4.48109e-06	21.0444
Indoleacetate levels	rs11889711	T	C	0.620089	-0.0719998	0.0157071	8208	4.56382e-06	21.0096
Indoleacetate levels	rs1479	G	T	0.197771	0.0905519	0.0192077	8208	2.42479e-06	22.2224
Indoleacetate levels	rs72551330	C	T	0.0147633	0.303539	0.0629629	8208	1.42903e-06	23.2384
Indoleacetate levels	rs146089696	C	A	0.0258431	-0.227745	0.048348	8208	2.47072e-06	22.1864
Indoleacetate levels	rs77535679	A	G	0.021052	0.272146	0.0527254	8208	2.4488e-07	26.6386
Indoleacetate levels	rs73152633	T	C	0.0404457	0.179659	0.0383524	8208	2.80725e-06	21.9412
Indoleacetate levels	rs9866361	A	G	0.164093	0.0952028	0.0206127	8208	3.86264e-06	21.3293
Indoleacetate levels	rs115634566	C	G	0.0194495	0.241854	0.0544403	8208	8.88975e-06	19.7339
Indoleacetate levels	rs13353672	A	G	0.206417	0.0847569	0.0190801	8208	8.90564e-06	19.7304
Indoleacetate levels	rs138960177	T	C	0.0350566	0.204895	0.0426063	8208	1.51653e-06	23.124
Indoleacetate levels	rs2187200	G	T	0.361312	-0.0712121	0.0160922	8208	9.63256e-06	19.5805
Indoleacetate levels	rs78906653	T	C	0.0749114	-0.144801	0.0290437	8208	6.17592e-07	24.8534
Indoleacetate levels	rs11575549	T	C	0.0179246	-0.37948	0.056925	8208	2.62308e-11	44.4343
Indoleacetate levels	rs867704	G	C	0.561746	-0.0700153	0.0154721	8208	6.03244e-06	20.4755
Indoleacetate levels	rs72663013	T	G	0.0196341	-0.282142	0.0546119	8208	2.38756e-07	26.6875
Indoleacetate levels	rs41280729	G	A	0.0591969	-0.148381	0.0323839	8208	4.6066e-06	20.9916
Indoleacetate levels	rs1929252	C	A	0.251463	-0.0790401	0.0175887	8208	6.99663e-06	20.1918
Indoleacetate levels	rs10999904	A	G	0.0982241	-0.134401	0.0257002	8208	1.69892e-07	27.3451
Indoleacetate levels	rs76522692	G	A	0.0266439	-0.220452	0.0473306	8208	3.19771e-06	21.6916
Indoleacetate levels	rs11518601	T	C	0.118732	-0.111869	0.0240488	8208	3.29131e-06	21.6361
Indoleacetate levels	rs11227288	C	G	0.180316	0.0899903	0.019745	8208	5.17353e-06	20.7694
Indoleacetate levels	rs35291122	A	G	0.0289393	-0.220159	0.0457359	8208	1.48155e-06	23.1689
Indoleacetate levels	rs118052117	T	C	0.0218319	0.234493	0.0518474	8208	6.10424e-06	20.4528
Indoleacetate levels	rs8061485	C	T	0.279379	-0.0845625	0.0169225	8208	5.82136e-07	24.9674
Indoleacetate levels	rs184875464	T	C	0.00561386	0.525364	0.102005	8208	2.59993e-07	26.5231
Indoleacetate levels	rs181823597	G	C	0.0594671	0.15968	0.0323035	8208	7.68805e-07	24.4314
Indoleacetate levels	rs79441299	T	C	0.014453	0.29338	0.0638741	8208	4.36696e-06	21.094
Indoleacetate levels	rs240759	A	G	0.955495	-0.170792	0.0381475	8208	7.56436e-06	20.0424
Indoleacetate levels	rs113532410	T	G	0.0584424	0.173939	0.0334364	8208	1.9707e-07	27.0584
Indoleacetate levels	rs5751124	A	G	0.0332277	0.19056	0.042405	8208	6.99601e-06	20.1919
1-linoleoylglycerol (18:2) levels	rs75445316	T	C	0.024875	0.241198	0.049473	8212	1.0862e-06	23.7661
1-linoleoylglycerol (18:2) levels	rs113627835	C	G	0.00861964	0.382342	0.0840396	8212	5.37605e-06	20.6958
1-linoleoylglycerol (18:2) levels	rs114473062	T	C	0.025608	0.226158	0.049117	8212	4.135e-06	21.1986
1-linoleoylglycerol (18:2) levels	rs77982886	G	A	0.0152346	0.316857	0.0635267	8212	6.10775e-07	24.8749
1-linoleoylglycerol (18:2) levels	rs10006032	G	A	0.0573319	-0.15194	0.0334117	8212	5.42817e-06	20.6773
1-linoleoylglycerol (18:2) levels	rs10072491	T	C	0.0420795	-0.17568	0.038446	8212	4.88843e-06	20.878
1-linoleoylglycerol (18:2) levels	rs62385039	G	A	0.0201079	-0.258001	0.0552286	8212	2.98985e-06	21.8204
1-linoleoylglycerol (18:2) levels	rs17410962	A	G	0.120383	-0.11411	0.0235805	8212	1.30378e-06	23.4147
1-linoleoylglycerol (18:2) levels	rs2943179	T	C	0.221974	-0.0822174	0.0185161	8212	8.98228e-06	19.714
1-linoleoylglycerol (18:2) levels	rs6475038	G	C	0.49482	-0.0721413	0.0159373	8212	5.99468e-06	20.4873
1-linoleoylglycerol (18:2) levels	rs10735636	G	C	0.981772	0.266346	0.0602083	8212	9.7007e-06	19.5671
1-linoleoylglycerol (18:2) levels	rs117168942	C	T	0.0332722	0.191261	0.0431454	8212	9.29617e-06	19.6486
1-linoleoylglycerol (18:2) levels	rs11033752	T	C	0.17797	-0.0907355	0.0204967	8212	9.56226e-06	19.5945
1-linoleoylglycerol (18:2) levels	rs964184	C	G	0.868723	-0.116525	0.0229017	8212	3.6178e-07	25.8851
1-linoleoylglycerol (18:2) levels	rs56354314	A	G	0.022346	0.235446	0.0519464	8212	5.82959e-06	20.5409
1-linoleoylglycerol (18:2) levels	rs12858688	T	C	0.0249358	-0.22125	0.0491192	8212	6.65784e-06	20.2867
1-linoleoylglycerol (18:2) levels	rs11160050	G	A	0.0875843	0.125943	0.028029	8212	7.01221e-06	20.1874
1-linoleoylglycerol (18:2) levels	rs12447287	C	T	0.245284	0.081903	0.0180828	8212	5.91739e-06	20.5123
1-linoleoylglycerol (18:2) levels	rs9894638	C	T	0.211593	0.0857298	0.0192292	8212	8.2607e-06	19.8741
2-linoleoylglycerol (18:2) levels	rs17035713	G	A	0.0555824	-0.176168	0.0391241	6378	6.70697e-06	20.272
2-linoleoylglycerol (18:2) levels	rs77599553	A	T	0.024663	-0.26624	0.0570875	6378	3.10541e-06	21.7469
2-linoleoylglycerol (18:2) levels	rs113718400	A	C	0.0198899	-0.278095	0.0628536	6378	9.66753e-06	19.573
2-linoleoylglycerol (18:2) levels	rs952263	T	G	0.231638	0.0960714	0.0209226	6378	4.39555e-06	21.0809
2-linoleoylglycerol (18:2) levels	rs55920120	A	C	0.0354543	0.211234	0.0475892	6378	9.05017e-06	19.6989
2-linoleoylglycerol (18:2) levels	rs4972489	C	A	0.219483	0.109484	0.0215719	6378	3.86888e-07	25.7547
2-linoleoylglycerol (18:2) levels	rs11924632	G	A	0.319162	-0.0837752	0.0189266	6378	9.58506e-06	19.5892
2-linoleoylglycerol (18:2) levels	rs73121585	A	C	0.0186813	-0.286922	0.0649528	6378	9.98952e-06	19.5103
2-linoleoylglycerol (18:2) levels	rs141172381	A	G	0.0189245	0.286907	0.0647015	6378	9.23638e-06	19.6601
2-linoleoylglycerol (18:2) levels	rs7643986	C	T	0.0314905	0.237339	0.0507469	6378	2.91221e-06	21.8701
2-linoleoylglycerol (18:2) levels	rs12498693	A	C	0.0908947	-0.140175	0.0306696	6378	4.86572e-06	20.8861
2-linoleoylglycerol (18:2) levels	rs72679893	T	C	0.0830319	-0.141425	0.031732	6378	8.31717e-06	19.8605
2-linoleoylglycerol (18:2) levels	rs190199861	G	A	0.018813	0.297064	0.0645441	6378	4.17461e-06	21.1797
2-linoleoylglycerol (18:2) levels	rs117372736	T	G	0.0135114	0.346995	0.0766527	6378	5.98694e-06	20.4891
2-linoleoylglycerol (18:2) levels	rs4946146	T	C	0.0182161	0.311867	0.0660179	6378	2.31267e-06	22.3125
2-linoleoylglycerol (18:2) levels	rs59927118	T	C	0.233493	0.0964238	0.0209287	6378	4.0802e-06	21.2234
2-linoleoylglycerol (18:2) levels	rs34291068	A	C	0.0631083	0.159431	0.0358652	6378	8.77744e-06	19.7575
2-linoleoylglycerol (18:2) levels	rs78575779	G	A	0.0286499	-0.234076	0.0525518	6378	8.42088e-06	19.8367
2-linoleoylglycerol (18:2) levels	rs111764634	A	C	0.0711024	0.160187	0.03428	6378	2.96979e-06	21.8326
2-linoleoylglycerol (18:2) levels	rs189863837	A	G	0.0248153	0.280524	0.0568874	6378	8.17175e-07	24.3131
2-linoleoylglycerol (18:2) levels	rs56327721	T	C	0.106214	-0.132143	0.0284005	6378	3.27423e-06	21.6455
2-linoleoylglycerol (18:2) levels	rs6081988	C	T	0.101462	0.130879	0.0293982	6378	8.5098e-06	19.8167
2-linoleoylglycerol (18:2) levels	rs11552067	A	G	0.587463	0.0845951	0.0181892	6378	3.30593e-06	21.6269
Indolepropionate levels	rs9432398	G	A	0.0316989	0.221475	0.0445422	8153	6.61795e-07	24.7202
Indolepropionate levels	rs80346659	C	G	0.0253623	-0.223208	0.0489983	8153	5.22784e-06	20.7493
Indolepropionate levels	rs6664713	A	C	0.0247598	0.221278	0.0497353	8153	8.6224e-06	19.7922
Indolepropionate levels	rs1878503	A	G	0.46355	0.0695737	0.0155972	8153	8.17115e-06	19.895
Indolepropionate levels	rs11681248	T	C	0.629022	-0.0861776	0.01577	8153	4.63824e-08	29.8588
Indolepropionate levels	rs76260755	T	C	0.110017	-0.113035	0.0255573	8153	9.74343e-06	19.5588
Indolepropionate levels	rs9857968	T	C	0.0567903	0.150356	0.0334056	8153	6.76581e-06	20.2558
Indolepropionate levels	rs76157950	A	G	0.0186095	0.259172	0.0571721	8153	5.80995e-06	20.5473
Indolepropionate levels	rs853154	C	G	0.156615	0.102766	0.0214138	8153	1.59433e-06	23.0281
Indolepropionate levels	rs117276795	A	G	0.0103757	0.356183	0.0769361	8153	3.66377e-06	21.4305
Indolepropionate levels	rs11822621	T	G	0.100928	-0.117218	0.025765	8153	5.37678e-06	20.6955
Indolepropionate levels	rs497768	G	C	0.561103	-0.0739761	0.0160037	8153	3.79268e-06	21.3643
Indolepropionate levels	rs9565718	A	T	0.630251	-0.0847838	0.0167172	8153	3.94378e-07	25.7185
Indolepropionate levels	rs61974973	G	A	0.0761626	0.132651	0.0296776	8153	7.83162e-06	19.9761
Indolepropionate levels	rs198260	A	G	0.97371	0.22816	0.048609	8153	2.68214e-06	22.0289
Indolepropionate levels	rs8061485	C	T	0.278471	-0.175473	0.0171848	8153	1.7712e-24	104.251
Indolepropionate levels	rs4316784	C	T	0.826904	0.0920404	0.0207915	8153	9.56335e-06	19.5944
Indolepropionate levels	rs9981680	G	T	0.0427167	0.169465	0.0383093	8153	9.70738e-06	19.5658
Threonate levels	rs567440118	A	G	0.00560552	-0.484057	0.102614	8151	2.39029e-06	22.2498
Threonate levels	rs647667	C	T	0.0591665	0.144169	0.0324617	8151	8.94643e-06	19.7219
Threonate levels	rs75194109	C	T	0.00818764	-0.397999	0.0851016	8151	2.9145e-06	21.8693
Threonate levels	rs11126412	T	A	0.222311	0.0812665	0.0182574	8151	8.54089e-06	19.8103
Threonate levels	rs4663135	C	T	0.784904	0.0837071	0.018929	8151	9.77159e-06	19.5531
Threonate levels	rs535146	A	T	0.384514	0.0748445	0.0158705	8151	2.40582e-06	22.2375
Threonate levels	rs145376871	T	G	0.0191146	-0.246684	0.0554495	8151	8.6348e-06	19.7894
Threonate levels	rs76954195	G	C	0.028169	0.206021	0.0459715	8151	7.41237e-06	20.0813
Threonate levels	rs78921993	G	A	0.07346	-0.129378	0.0291215	8151	8.88449e-06	19.7351
Threonate levels	rs184637108	T	A	0.0078808	-0.381288	0.0860405	8151	9.35832e-06	19.6357
Threonate levels	rs139591016	C	T	0.0203237	-0.244512	0.0539409	8151	5.81637e-06	20.5452
Threonate levels	rs73766900	A	G	0.0293864	0.209381	0.0453361	8151	3.86671e-06	21.3272
Threonate levels	rs111498995	T	A	0.0168734	0.275959	0.0591476	8151	3.07719e-06	21.7651
Threonate levels	rs62381620	G	T	0.0304893	-0.293756	0.0441641	8151	2.90219e-11	44.2366
Threonate levels	rs61744140	G	T	0.000184411	-2.86664	0.562079	8151	3.39546e-07	26.0075
Threonate levels	rs80179348	T	A	0.0133227	-0.319612	0.066975	8151	1.82303e-06	22.7702
Threonate levels	rs149656965	T	C	0.0120586	-0.320596	0.0696557	8151	4.17282e-06	21.1812
Threonate levels	rs78263978	A	G	0.02583	-0.22873	0.0484595	8151	2.35808e-06	22.2759
Threonate levels	rs2394872	C	A	0.0928766	-0.121016	0.0261549	8151	3.71226e-06	21.4055
Threonate levels	rs77181656	T	C	0.0133923	-0.318701	0.066826	8151	1.85035e-06	22.7417
Threonate levels	rs76379749	C	T	0.0217525	-0.229603	0.0518367	8151	9.45159e-06	19.6168
Threonate levels	rs7875568	G	T	0.0196633	-0.255385	0.0546341	8151	2.94733e-06	21.8479
Threonate levels	rs72774956	A	G	0.0203856	-0.239983	0.0535446	8151	7.39715e-06	20.0852
Threonate levels	rs826459	A	G	0.70797	0.0767693	0.017064	8151	6.83005e-06	20.2377
Threonate levels	rs74850022	T	C	0.0122956	-0.30887	0.0693354	8151	8.40015e-06	19.8421
Threonate levels	rs7960425	C	G	0.024852	0.238798	0.0488539	8151	1.01868e-06	23.8896
Threonate levels	rs4783107	C	T	0.886875	-0.116779	0.0239738	8151	1.10964e-06	23.7248
N-acetylglycine levels	rs75446748	C	T	0.142724	-0.100817	0.0215403	8250	2.86322e-06	21.9034
N-acetylglycine levels	rs1890452	A	G	0.337406	-0.0770614	0.0157164	8250	9.42707e-07	24.0389
N-acetylglycine levels	rs112816924	T	C	0.0153734	0.275875	0.0608934	8250	5.8859e-06	20.5226
N-acetylglycine levels	rs16824802	T	C	0.201151	0.0978791	0.0188923	8250	2.20805e-07	26.8385
N-acetylglycine levels	rs1047891	A	C	0.307889	0.381478	0.0157461	8250	1.16081e-129	586.868
N-acetylglycine levels	rs62182612	A	G	0.194247	-0.0838786	0.0187414	8250	7.62083e-06	20.0284
N-acetylglycine levels	rs77976040	C	A	0.0176413	0.25373	0.0570551	8250	8.70314e-06	19.7743
N-acetylglycine levels	rs9821781	A	G	0.560748	0.0826592	0.0152654	8250	6.13598e-08	29.3166
N-acetylglycine levels	rs358908	C	T	0.258424	-0.0883162	0.0172318	8250	2.97225e-07	26.2644
N-acetylglycine levels	rs12233751	C	A	0.140374	-0.107576	0.021548	8250	5.96375e-07	24.9209
N-acetylglycine levels	rs115090460	T	A	0.0255581	-0.213667	0.04776	8250	7.68538e-06	20.0121
N-acetylglycine levels	rs243795	C	T	0.208481	0.0882873	0.0184131	8250	1.62837e-06	22.9874
N-acetylglycine levels	rs4947536	G	C	0.499694	-0.0672825	0.0150525	8250	7.82701e-06	19.9772
N-acetylglycine levels	rs11136810	G	C	0.400543	0.072029	0.0152368	8250	2.27522e-06	22.3447
N-acetylglycine levels	rs76513761	C	T	0.0282572	0.202404	0.0452943	8250	7.87172e-06	19.9663
N-acetylglycine levels	rs78612075	A	G	0.0158633	0.271706	0.0604624	8250	6.99641e-06	20.1918
N-acetylglycine levels	rs10757444	A	G	0.69497	0.080588	0.0163581	8250	8.37259e-07	24.2674
N-acetylglycine levels	rs144831076	C	T	0.0180032	-0.284047	0.056482	8250	4.93093e-07	25.2876
N-acetylglycine levels	rs151202997	T	G	0.0315572	0.193942	0.0427714	8250	5.77718e-06	20.5582
N-acetylglycine levels	rs596603	G	T	0.572668	-0.115999	0.0149808	8250	9.69793e-15	59.9495
N-acetylglycine levels	rs7127777	C	G	0.445641	-0.0733441	0.0154452	8250	2.04763e-06	22.5471
N-acetylglycine levels	rs11108842	G	T	0.00985641	-0.347252	0.0751899	8250	3.86845e-06	21.3264
N-acetylglycine levels	rs2329096	T	C	0.351672	0.0709468	0.015894	8250	8.05364e-06	19.9226
N-acetylglycine levels	rs141342711	T	C	0.0552779	0.156311	0.0326222	8250	1.65503e-06	22.9562
N-acetylglycine levels	rs78829102	A	G	0.035272	0.188424	0.0402532	8250	2.85524e-06	21.9088
N-acetylglycine levels	rs117206739	T	C	0.0202867	0.23915	0.0531026	8250	6.68267e-06	20.2795
N-acetylglycine levels	rs9614932	T	C	0.143251	-0.101483	0.0214974	8250	2.35019e-06	22.2824
Glycolithocholate levels	rs187970821	G	A	0.0104006	-0.36255	0.0819826	7158	9.7666e-06	19.5538
Glycolithocholate levels	rs115887046	C	T	0.0330149	-0.206093	0.046384	7158	8.8635e-06	19.7392
Glycolithocholate levels	rs73918203	A	G	0.0496689	-0.179866	0.0388237	7158	3.60609e-06	21.4607
Glycolithocholate levels	rs13405102	G	A	0.467103	0.0780611	0.0171532	7158	5.34361e-06	20.7071
Glycolithocholate levels	rs79407744	A	G	0.0115007	0.360499	0.0784962	7158	4.37829e-06	21.0887
Glycolithocholate levels	rs77376288	C	T	0.00937194	0.42291	0.0866346	7158	1.05259e-06	23.8261
Glycolithocholate levels	rs113654354	G	A	0.024409	-0.239492	0.054054	7158	9.39685e-06	19.6275
Glycolithocholate levels	rs55971662	T	C	0.440459	0.0761508	0.0170398	7158	7.85848e-06	19.9691
Glycolithocholate levels	rs7646869	A	C	0.383482	-0.0761641	0.0170125	7158	7.57115e-06	20.0403
Glycolithocholate levels	rs7629795	A	T	0.864328	0.108234	0.0242047	7158	7.76315e-06	19.9925
Glycolithocholate levels	rs6823721	T	C	0.520367	-0.0756087	0.0164302	7158	4.18858e-06	21.1737
Glycolithocholate levels	rs6810998	T	C	0.0889636	-0.151927	0.0297616	7158	3.31142e-07	26.0553
Glycolithocholate levels	rs138634970	T	C	0.01307	-0.326848	0.0726276	7158	6.78501e-06	20.2501
Glycolithocholate levels	rs146058026	G	C	0.0120152	-0.350809	0.0764568	7158	4.46812e-06	21.0498
Glycolithocholate levels	rs12662646	A	G	0.0603497	-0.165539	0.0347192	7158	1.86115e-06	22.7301
Glycolithocholate levels	rs11101389	A	T	0.268308	-0.0917167	0.0190277	7158	1.43433e-06	23.2308
Glycolithocholate levels	rs11817632	A	G	0.0194032	-0.271521	0.0604452	7158	7.05527e-06	20.1754
Glycolithocholate levels	rs182015775	A	G	0.11646	-0.128395	0.0260547	7158	8.3118e-07	24.2808
Glycolithocholate levels	rs118171449	T	C	0.0767077	0.140008	0.031363	7158	8.03933e-06	19.9255
Glycolithocholate levels	rs146355728	T	G	0.00830869	-0.424019	0.0914518	7158	3.54301e-06	21.4944
Glycolithocholate levels	rs60850040	C	T	0.0656601	-0.154409	0.0332636	7158	3.4508e-06	21.545
Glycolithocholate levels	rs1818709	C	G	0.453585	-0.0762769	0.0168878	7158	6.28155e-06	20.3976
Glycolithocholate levels	rs62052803	C	T	0.0454737	-0.176732	0.0399741	7158	9.81782e-06	19.5439
Glycolithocholate levels	rs296366	C	T	0.754105	-0.0945409	0.0194924	7158	1.23367e-06	23.5206
Glycolithocholate levels	rs16982178	A	G	0.143877	-0.111062	0.0236265	7158	2.5924e-06	22.0939
EDTA levels	rs116301309	A	C	0.0125152	-0.315234	0.0672785	8239	2.79271e-06	21.9513
EDTA levels	rs9784059	T	C	0.0557718	-0.148526	0.0325498	8239	5.04212e-06	20.8188
EDTA levels	rs2435388	G	A	0.765692	-0.0823434	0.0178025	8239	3.73883e-06	21.3916
EDTA levels	rs11688483	G	A	0.310804	-0.0751194	0.0163022	8239	4.06695e-06	21.2304
EDTA levels	rs73212280	G	A	0.118421	0.118902	0.0232367	8239	3.10445e-07	26.1804
EDTA levels	rs10512739	G	A	0.0936777	-0.113507	0.0256877	8239	9.92862e-06	19.5228
EDTA levels	rs79242179	A	G	0.0120423	-0.329439	0.0689279	8239	1.75756e-06	22.8406
EDTA levels	rs149452470	G	C	0.0166054	0.268339	0.0583171	8239	4.19693e-06	21.1701
EDTA levels	rs7776366	C	T	0.695232	0.074063	0.0167413	8239	9.68998e-06	19.5691
EDTA levels	rs57900160	G	C	0.257555	-0.0804207	0.0172759	8239	3.23875e-06	21.6671
EDTA levels	rs62577978	A	G	0.138669	-0.0981073	0.0218942	8239	7.43023e-06	20.0767
EDTA levels	rs12831673	A	G	0.055853	0.155271	0.0325321	8239	1.8163e-06	22.7774
EDTA levels	rs117358502	A	G	0.0320248	0.193608	0.0424643	8239	5.13223e-06	20.7848
EDTA levels	rs77657639	C	A	0.0789602	0.123886	0.0277549	8239	8.06068e-06	19.9211
EDTA levels	rs34922061	A	C	0.17996	0.0893043	0.0197543	8239	6.1618e-06	20.4347
EDTA levels	rs10459865	C	T	0.112471	0.105994	0.0236672	8239	7.51556e-06	20.0547
EDTA levels	rs183037566	A	G	0.00997203	0.352731	0.0751141	8239	2.65388e-06	22.0491
1-methylhistidine levels	rs56407361	T	C	0.0585443	0.143585	0.0313911	8226	4.78341e-06	20.9195
1-methylhistidine levels	rs140416084	A	G	0.105825	-0.12314	0.0242476	8226	3.80516e-07	25.7874
1-methylhistidine levels	rs149464341	T	G	0.00870465	-0.367016	0.0807331	8226	5.46633e-06	20.664
1-methylhistidine levels	rs4686501	G	A	0.91482	-0.1202	0.0266383	8226	6.41325e-06	20.3584
1-methylhistidine levels	rs546649	T	C	0.428694	-0.0736867	0.0152675	8226	1.39027e-06	23.2911
1-methylhistidine levels	rs544646419	G	A	0.0178637	-0.253741	0.0563403	8226	6.67718e-06	20.281
1-methylhistidine levels	rs73864608	A	G	0.0192942	-0.248871	0.0541941	8226	4.38557e-06	21.0859
1-methylhistidine levels	rs11133665	A	G	0.291059	0.156172	0.0164769	8226	2.58604e-21	89.8261
1-methylhistidine levels	rs79479138	T	C	0.0161908	0.278813	0.0594002	8226	2.6817e-06	22.0291
1-methylhistidine levels	rs1990897	G	T	0.321116	0.0781977	0.0159956	8226	1.01505e-06	23.8965
1-methylhistidine levels	rs80220760	G	A	0.015379	0.287214	0.0604881	8226	2.05169e-06	22.5434
1-methylhistidine levels	rs78654791	G	C	0.0259158	0.212125	0.0474708	8226	7.87603e-06	19.9654
1-methylhistidine levels	rs7746774	G	A	0.144242	-0.106907	0.021178	8226	4.46461e-07	25.4794
1-methylhistidine levels	rs10094039	G	A	0.622218	-0.069388	0.0154645	8226	7.22541e-06	20.13
1-methylhistidine levels	rs2218687	A	G	0.146767	0.0948989	0.0214092	8226	9.30903e-06	19.6458
1-methylhistidine levels	rs1903860	C	T	0.142707	-0.0951231	0.0213894	8226	8.69979e-06	19.7752
1-methylhistidine levels	rs10886134	C	A	0.567596	0.0673851	0.0151425	8226	8.58469e-06	19.8007
1-methylhistidine levels	rs61910449	T	C	0.0361754	-0.179716	0.0397708	8226	6.21905e-06	20.417
1-methylhistidine levels	rs111339300	A	G	0.110438	-0.120806	0.0240792	8226	5.24806e-07	25.1675
1-methylhistidine levels	rs73154072	G	A	0.0161842	-0.27116	0.0593007	8226	4.81645e-06	20.9064
1-methylhistidine levels	rs9526057	A	G	0.261171	-0.0823478	0.0172987	8226	1.93248e-06	22.6581
1-methylhistidine levels	rs1535573	G	A	0.780847	-0.0822322	0.0180298	8226	5.09362e-06	20.7993
1-methylhistidine levels	rs7145174	A	G	0.0434889	0.167413	0.0364336	8226	4.32686e-06	21.1116
1-methylhistidine levels	rs148226190	G	T	0.0116579	-0.331065	0.0702443	8226	2.4404e-06	22.2102
1-methylhistidine levels	rs12901652	T	C	0.0484837	0.155465	0.0348044	8226	7.93886e-06	19.9501
1-methylhistidine levels	rs1554410	G	T	0.438307	0.0680514	0.015105	8226	6.63026e-06	20.2946
1-methylhistidine levels	rs1670276	C	T	0.129835	0.109213	0.0224365	8226	1.12929e-06	23.6911
1-methylhistidine levels	rs35285898	C	A	0.262279	0.159332	0.0168676	8226	3.51879e-21	89.2168
1-methylhistidine levels	rs4043681	G	A	0.90818	0.130261	0.0260698	8226	5.83352e-07	24.9632
1-methylhistidine levels	rs6118747	G	A	0.210838	-0.0916807	0.0182847	8226	5.32895e-07	25.1378
1-methylhistidine levels	rs35042303	T	C	0.0664537	0.169952	0.0300921	8226	1.62586e-08	31.893
1-methylhistidine levels	rs148357196	T	A	0.00913298	0.34753	0.0778149	8226	7.96536e-06	19.9437
Citramalate levels	rs188517032	G	A	0.019111	0.27034	0.0605876	7125	8.12072e-06	19.9064
Citramalate levels	rs12131960	A	T	0.270845	0.0839684	0.0187574	7125	7.58644e-06	20.0367
Citramalate levels	rs13391525	G	C	0.162856	-0.102419	0.0224149	7125	4.89518e-06	20.875
Citramalate levels	rs79981355	C	T	0.11165	-0.12161	0.0260117	7125	2.93676e-06	21.8545
Citramalate levels	rs62180249	T	C	0.263858	0.0938403	0.0192855	7125	1.13968e-06	23.6731
Citramalate levels	rs11563055	G	A	0.0126074	-0.331464	0.0744809	7125	8.57394e-06	19.8026
Citramalate levels	rs76762532	T	G	0.0329989	-0.21222	0.046059	7125	4.07416e-06	21.2267
Citramalate levels	rs72713558	G	A	0.0872735	-0.129284	0.0292191	7125	9.65991e-06	19.5747
Citramalate levels	rs12055187	A	G	0.0192061	0.268581	0.0604753	7125	8.94707e-06	19.7212
Citramalate levels	rs141073864	C	T	0.0150671	0.308909	0.0687729	7125	7.06492e-06	20.1728
Citramalate levels	rs80028711	G	A	0.0117325	0.34128	0.0761119	7125	7.32821e-06	20.1028
Citramalate levels	rs148830279	T	C	0.00725556	-0.43597	0.0967004	7125	6.53012e-06	20.3234
Citramalate levels	rs2502543	G	A	0.270452	-0.0847163	0.0188698	7125	7.138e-06	20.1529
Citramalate levels	rs12211905	G	T	0.477649	0.0758092	0.0167419	7125	5.95152e-06	20.5009
Citramalate levels	rs188983534	A	G	0.0642616	-0.155646	0.0338062	7125	4.14289e-06	21.1945
Citramalate levels	rs17665117	A	T	0.0895377	0.131321	0.029673	7125	9.61721e-06	19.5832
Citramalate levels	rs116991170	T	C	0.0207334	0.268336	0.0579862	7125	3.69963e-06	21.4115
Citramalate levels	rs1889899	G	A	0.381116	0.0900574	0.0170887	7125	1.36415e-07	27.769
Citramalate levels	rs76427286	A	G	0.023197	-0.247755	0.0547662	7125	6.07207e-06	20.4625
Citramalate levels	rs117013417	T	C	0.0121574	-0.337827	0.075726	7125	8.15089e-06	19.8993
Citramalate levels	rs1157094	A	C	0.819934	-0.104351	0.0214635	7125	1.16325e-06	23.6337
Citramalate levels	rs221084	T	C	0.143109	0.108157	0.0235317	7125	4.30193e-06	21.1223
Citramalate levels	rs41281112	T	C	0.0238865	-0.266851	0.0539977	7125	7.7369e-07	24.4189
Citramalate levels	rs12900072	A	G	0.462872	0.0775075	0.0166471	7125	3.2256e-06	21.6745
Citramalate levels	rs142847889	G	C	0.00562272	0.528397	0.110597	7125	1.77337e-06	22.823
3-hydroxydecanoate levels	rs28415528	A	G	0.317899	-0.209871	0.016024	8239	3.41299e-39	171.518
3-hydroxydecanoate levels	rs299647	C	T	0.20984	-0.0858123	0.0185046	8239	3.52889e-06	21.5024
3-hydroxydecanoate levels	rs6844622	G	C	0.580469	-0.0711572	0.0154677	8239	4.21745e-06	21.1609
3-hydroxydecanoate levels	rs114537113	T	C	0.0114546	-0.330467	0.071325	8239	3.59954e-06	21.4645
3-hydroxydecanoate levels	rs80144245	C	T	0.032466	-0.208918	0.0425154	8239	8.9268e-07	24.1438
3-hydroxydecanoate levels	rs111528473	A	G	0.00730105	0.403688	0.0884272	8239	4.99021e-06	20.8385
3-hydroxydecanoate levels	rs144727225	T	C	0.0236938	-0.225369	0.0493589	8239	4.97295e-06	20.8451
3-hydroxydecanoate levels	rs488485	C	T	0.841825	-0.0943596	0.0211094	8239	7.82067e-06	19.9787
3-hydroxydecanoate levels	rs11052064	C	T	0.0554543	0.145747	0.0327583	8239	8.62104e-06	19.7926
3-hydroxydecanoate levels	rs9603710	G	T	0.512044	-0.066296	0.0149651	8239	9.42146e-06	19.6229
3-hydroxydecanoate levels	rs9530666	C	A	0.533242	-0.0689846	0.015239	8239	5.98731e-06	20.4898
3-hydroxydecanoate levels	rs59627096	G	A	0.161978	-0.0943227	0.0206078	8239	4.71619e-06	20.9467
3-hydroxydecanoate levels	rs12453818	G	A	0.703012	0.0764897	0.0169153	8239	6.1277e-06	20.4453
3-hydroxydecanoate levels	rs10445235	T	C	0.761006	0.0823205	0.017876	8239	4.12281e-06	21.2042
3-hydroxydecanoate levels	rs148758368	T	A	0.00863747	0.370269	0.0808217	8239	4.62085e-06	20.9858
1,3-dimethylurate levels	rs138045396	A	G	0.0350913	0.199454	0.044885	7444	8.84358e-06	19.7435
1,3-dimethylurate levels	rs10194878	C	T	0.283293	0.0873181	0.0182519	7444	1.71797e-06	22.8841
1,3-dimethylurate levels	rs78121311	G	T	0.039261	-0.203071	0.0427853	7444	2.07207e-06	22.5241
1,3-dimethylurate levels	rs7699259	A	G	0.472503	0.0805936	0.0166295	7444	1.2571e-06	23.4847
1,3-dimethylurate levels	rs6859899	G	A	0.157066	-0.10352	0.0224663	7444	4.0702e-06	21.2289
1,3-dimethylurate levels	rs1388107	T	G	0.138735	-0.105876	0.0236541	7444	7.60496e-06	20.032
1,3-dimethylurate levels	rs72818634	A	G	0.129326	-0.112169	0.0248028	7444	6.11378e-06	20.4497
1,3-dimethylurate levels	rs35094757	G	A	0.014158	-0.31092	0.0698636	7444	8.57152e-06	19.8033
1,3-dimethylurate levels	rs57238734	C	A	0.0133351	-0.319455	0.0716983	7444	8.36823e-06	19.8492
1,3-dimethylurate levels	rs72712651	C	T	0.030274	-0.215519	0.0480665	7444	7.33386e-06	20.1015
1,3-dimethylurate levels	rs7038710	G	A	0.0228741	-0.282261	0.0546831	7444	2.44633e-07	26.6402
1,3-dimethylurate levels	rs7091698	A	G	0.153689	0.102016	0.0230217	7444	9.36743e-06	19.6338
1,3-dimethylurate levels	rs11599254	T	C	0.0850791	0.130505	0.0293659	7444	8.8256e-06	19.7474
1,3-dimethylurate levels	rs72868316	A	G	0.0292732	0.342008	0.0487503	7444	2.29104e-12	49.2107
1,3-dimethylurate levels	rs11101870	T	C	0.152488	-0.120114	0.0228253	7444	1.4226e-07	27.6883
1,3-dimethylurate levels	rs28452143	G	A	0.63166	0.0773975	0.0170037	7444	5.31921e-06	20.7161
1,3-dimethylurate levels	rs143167061	T	C	0.0193422	-0.2654	0.0595893	7444	8.43536e-06	19.8338
1,3-dimethylurate levels	rs11235978	A	G	0.0926578	0.127658	0.0281119	7444	5.59713e-06	20.6185
1,3-dimethylurate levels	rs117238703	G	T	0.0275347	-0.224046	0.0503738	7444	8.68046e-06	19.7791
1,3-dimethylurate levels	rs12855367	G	A	0.12214	0.115901	0.02495	7444	3.39529e-06	21.5762
1,3-dimethylurate levels	rs1033930	T	G	0.663938	0.0813366	0.0174666	7444	3.21324e-06	21.6819
1,3-dimethylurate levels	rs188985963	T	C	0.00588633	0.511207	0.107882	7444	2.15233e-06	22.4511
1,3-dimethylurate levels	rs78018441	A	G	0.0605772	-0.164796	0.0345099	7444	1.79403e-06	22.8007
1,3-dimethylurate levels	rs226220	G	A	0.889334	0.130753	0.0261663	7444	5.82303e-07	24.9667
1,3-dimethylurate levels	rs143552547	A	G	0.0441276	-0.178534	0.0396907	7444	6.85529e-06	20.2305
1,3-dimethylurate levels	rs205788	T	C	0.792873	-0.0972257	0.0210377	7444	3.8098e-06	21.3554
Galactonate levels	rs6701658	G	A	0.0589528	-0.155143	0.0337346	7518	4.24655e-06	21.1473
Galactonate levels	rs144275620	T	C	0.0101946	0.35433	0.0790411	7518	7.36518e-06	20.0933
Galactonate levels	rs1446585	G	A	0.322523	-0.121817	0.0166585	7518	2.61978e-13	53.4671
Galactonate levels	rs4668098	G	A	0.811002	0.0932	0.0205822	7518	5.94939e-06	20.5017
Galactonate levels	rs114843083	A	C	0.0184418	-0.27591	0.0596858	7518	3.78756e-06	21.3666
Galactonate levels	rs78414202	A	G	0.00961795	-0.38065	0.0824987	7518	3.94971e-06	21.2863
Galactonate levels	rs55947356	A	G	0.00533903	-0.532189	0.110189	7518	1.36676e-06	23.3237
Galactonate levels	rs144166724	T	C	0.00891421	-0.424108	0.085763	7518	7.60954e-07	24.4509
Galactonate levels	rs10965244	T	A	0.21717	0.0909597	0.0197553	7518	4.13827e-06	21.1969
Galactonate levels	rs16956661	C	G	0.0713328	-0.16477	0.0310171	7518	1.08296e-07	28.216
Galactonate levels	rs118097128	T	A	0.0369848	-0.202653	0.0427349	7518	2.11518e-06	22.4845
Galactonate levels	rs187521737	A	G	0.00691832	0.441771	0.0972829	7518	5.59642e-06	20.6188
Galactonate levels	rs116885105	A	T	0.0301982	-0.224184	0.0476035	7518	2.48454e-06	22.1755
Galactonate levels	rs75684329	A	T	0.0630576	-0.164546	0.033017	7518	6.239e-07	24.8337
Galactonate levels	rs11668541	A	G	0.0217245	0.25389	0.0552438	7518	4.3108e-06	21.1187
Galactonate levels	rs73136572	C	T	0.0445703	0.177296	0.0385336	7518	4.20303e-06	21.1671
Trigonelline (n'-methylnicotinate) levels	rs115558877	G	A	0.0162034	0.283083	0.0606415	8272	3.03925e-06	21.7889
Trigonelline (n'-methylnicotinate) levels	rs114830966	A	G	0.0103465	-0.375581	0.0769197	8272	1.04609e-06	23.8385
Trigonelline (n'-methylnicotinate) levels	rs1594297	A	G	0.974151	0.243317	0.0498295	8272	1.04486e-06	23.8407
Trigonelline (n'-methylnicotinate) levels	rs116020639	C	T	0.0157971	-0.277233	0.0620127	8272	7.80092e-06	19.9837
Trigonelline (n'-methylnicotinate) levels	rs4848147	A	G	0.377018	-0.0712734	0.0158212	8272	6.63993e-06	20.2919
Trigonelline (n'-methylnicotinate) levels	rs61419985	C	T	0.0105881	-0.333293	0.0747585	8272	8.2628e-06	19.8737
Trigonelline (n'-methylnicotinate) levels	rs62246138	A	G	0.0322933	-0.208306	0.0441862	8272	2.42575e-06	22.2217
Trigonelline (n'-methylnicotinate) levels	rs4856225	T	C	0.795048	0.0867398	0.0191329	8272	5.8002e-06	20.5505
Trigonelline (n'-methylnicotinate) levels	rs1601568	T	A	0.85011	0.104566	0.0213989	8272	1.02644e-06	23.8751
Trigonelline (n'-methylnicotinate) levels	rs75972606	C	T	0.0285056	0.208073	0.0462893	8272	6.9548e-06	20.2031
Trigonelline (n'-methylnicotinate) levels	rs115146351	A	G	0.0596598	-0.147385	0.0328319	8272	7.1528e-06	20.1494
Trigonelline (n'-methylnicotinate) levels	rs75166338	G	A	0.0109104	-0.333795	0.0733501	8272	5.34651e-06	20.7065
Trigonelline (n'-methylnicotinate) levels	rs3849062	G	A	0.301836	-0.0770005	0.0169027	8272	5.22598e-06	20.7502
Trigonelline (n'-methylnicotinate) levels	rs6909263	A	G	0.432108	0.0696963	0.0156089	8272	8.00082e-06	19.9353
Trigonelline (n'-methylnicotinate) levels	rs45603636	A	G	0.0102711	-0.392277	0.0769037	8272	3.38053e-07	26.0159
Trigonelline (n'-methylnicotinate) levels	rs115151170	C	T	0.0115656	-0.338886	0.0722547	8272	2.72995e-06	21.9949
Trigonelline (n'-methylnicotinate) levels	rs117187192	A	G	0.0326366	-0.197012	0.0437787	8272	6.78949e-06	20.2492
Trigonelline (n'-methylnicotinate) levels	rs10088682	T	C	0.458222	0.0694216	0.015521	8272	7.72241e-06	20.0031
Trigonelline (n'-methylnicotinate) levels	rs73328382	A	C	0.00587879	-0.470821	0.101083	8272	3.19674e-06	21.6922
Trigonelline (n'-methylnicotinate) levels	rs117728044	G	A	0.0188714	-0.259555	0.0570087	8272	5.29086e-06	20.7264
Trigonelline (n'-methylnicotinate) levels	rs345471	A	G	0.661226	-0.0730759	0.016223	8272	6.65398e-06	20.2877
Trigonelline (n'-methylnicotinate) levels	rs115520044	A	G	0.0166484	0.296117	0.0603473	8272	9.2531e-07	24.0746
Trigonelline (n'-methylnicotinate) levels	rs77535466	C	A	0.0162774	-0.285605	0.060652	8272	2.49049e-06	22.1712
Trigonelline (n'-methylnicotinate) levels	rs118074685	C	T	0.0510204	0.172201	0.0346761	8272	6.83523e-07	24.658
Trigonelline (n'-methylnicotinate) levels	rs59603647	G	C	0.158436	0.0976318	0.0214455	8272	5.29969e-06	20.7232
Dodecanedioate (C12-DC) levels	rs1126743	A	G	0.791893	0.136271	0.0185101	8240	1.81245e-13	54.1922
Dodecanedioate (C12-DC) levels	rs2351032	A	G	0.478607	-0.0714967	0.0151331	8240	2.3065e-06	22.3184
Dodecanedioate (C12-DC) levels	rs3123536	T	C	0.89625	0.126379	0.0245728	8240	2.7033e-07	26.4477
Dodecanedioate (C12-DC) levels	rs6719212	A	G	0.536605	-0.0668909	0.0149722	8240	7.90801e-06	19.9577
Dodecanedioate (C12-DC) levels	rs80102840	A	G	0.0173319	-0.270487	0.0576409	8240	2.69718e-06	22.018
Dodecanedioate (C12-DC) levels	rs13070262	T	C	0.231974	-0.0810322	0.0181387	8240	7.91858e-06	19.9549
Dodecanedioate (C12-DC) levels	rs73135319	T	C	0.145563	0.0978948	0.0212543	8240	4.10725e-06	21.2116
Dodecanedioate (C12-DC) levels	rs148536062	C	G	0.0145678	-0.291786	0.0623865	8240	2.91002e-06	21.8723
Dodecanedioate (C12-DC) levels	rs75648263	A	T	0.0564846	-0.15344	0.0325258	8240	2.38773e-06	22.252
Dodecanedioate (C12-DC) levels	rs184688493	A	C	0.0451641	0.181186	0.0359985	8240	4.82502e-07	25.3296
Dodecanedioate (C12-DC) levels	rs114733295	T	G	0.0156079	0.278693	0.0604881	8240	4.07714e-06	21.2256
Dodecanedioate (C12-DC) levels	rs12662092	A	G	0.153963	0.0970377	0.020626	8240	2.54331e-06	22.1309
Dodecanedioate (C12-DC) levels	rs6983258	G	T	0.0967329	0.114187	0.0252057	8240	5.89203e-06	20.5203
Dodecanedioate (C12-DC) levels	rs192475369	T	A	0.0167687	0.269888	0.0575722	8240	2.76128e-06	21.973
Dodecanedioate (C12-DC) levels	rs55674412	T	A	0.0595855	-0.143218	0.0316604	8240	6.08044e-06	20.4602
Dodecanedioate (C12-DC) levels	rs7116407	T	C	0.0368633	-0.173285	0.0391521	8240	9.60228e-06	19.5866
Dodecanedioate (C12-DC) levels	rs35281705	A	G	0.6779	0.0716316	0.0162007	8240	9.80114e-06	19.5474
Dodecanedioate (C12-DC) levels	rs4149067	G	C	0.191759	0.0832833	0.0188237	8240	9.67132e-06	19.5728
Dodecanedioate (C12-DC) levels	rs146947505	A	G	0.0162592	0.287105	0.0585823	8240	9.5409e-07	24.0157
Dodecanedioate (C12-DC) levels	rs79949294	T	G	0.014638	-0.3048	0.0618631	8240	8.34987e-07	24.2725
Dodecanedioate (C12-DC) levels	rs11070743	T	C	0.578776	0.0721838	0.0153097	8240	2.4181e-06	22.2276
Dodecanedioate (C12-DC) levels	rs8054168	A	C	0.45913	-0.0690726	0.0151392	8240	5.05477e-06	20.8139
Dodecanedioate (C12-DC) levels	rs34744504	G	T	0.505166	-0.0814315	0.0156028	8240	1.79863e-07	27.235
Dodecanedioate (C12-DC) levels	rs185720945	C	A	0.0182593	0.250057	0.0557587	8240	7.3041e-06	20.1094
Dodecanedioate (C12-DC) levels	rs6024739	C	T	0.756911	-0.082091	0.0179227	8240	4.64338e-06	20.9764
Isobutyrylcarnitine (c4) levels	rs623898	G	A	0.14762	0.0978518	0.0218005	8243	7.17206e-06	20.1443
Isobutyrylcarnitine (c4) levels	rs72754719	T	C	0.00894487	0.380179	0.081524	8243	3.11034e-06	21.7447
Isobutyrylcarnitine (c4) levels	rs75005157	G	A	0.00686096	0.440409	0.0934244	8243	2.42821e-06	22.2197
Isobutyrylcarnitine (c4) levels	rs594855	G	A	0.34902	0.0730304	0.0164346	8243	8.8424e-06	19.7441
Isobutyrylcarnitine (c4) levels	rs192049058	A	C	0.223096	-0.0881467	0.0182397	8243	1.34712e-06	23.352
Isobutyrylcarnitine (c4) levels	rs28504259	G	C	0.352048	0.106097	0.0163475	8243	8.57719e-11	42.1164
Isobutyrylcarnitine (c4) levels	rs72758669	C	G	0.0289582	0.221719	0.0459139	8243	1.37207e-06	23.3166
Isobutyrylcarnitine (c4) levels	rs72778532	T	C	0.0692925	0.141234	0.0299006	8243	2.31889e-06	22.3083
Isobutyrylcarnitine (c4) levels	rs191926926	T	C	0.0199167	-0.262519	0.0554772	8243	2.22293e-06	22.3893
Isobutyrylcarnitine (c4) levels	rs17876025	G	A	0.00642595	0.462622	0.096872	8243	1.79167e-06	22.8036
Isobutyrylcarnitine (c4) levels	rs117599469	T	C	0.00565625	0.46237	0.102868	8243	6.96425e-06	20.2007
Isobutyrylcarnitine (c4) levels	rs1361218	A	G	0.437217	0.070309	0.0158874	8243	9.62371e-06	19.5823
Isobutyrylcarnitine (c4) levels	rs7759074	C	A	0.829783	-0.100958	0.0204135	8243	7.58954e-07	24.4565
Isobutyrylcarnitine (c4) levels	rs80254170	G	A	0.074915	-0.397805	0.0286752	8243	9.26033e-44	192.431
Isobutyrylcarnitine (c4) levels	rs662138	G	C	0.174911	-0.426307	0.0197773	8243	4.72082e-103	464.578
Isobutyrylcarnitine (c4) levels	rs2392361	A	G	0.657921	-0.0750551	0.0166474	8243	6.52794e-06	20.3243
Isobutyrylcarnitine (c4) levels	rs74505345	T	C	0.0377886	-0.178643	0.0401706	8243	8.70369e-06	19.7744
Isobutyrylcarnitine (c4) levels	rs73212370	T	G	0.0582117	-0.152833	0.0330324	8243	3.71425e-06	21.4043
Isobutyrylcarnitine (c4) levels	rs10746936	T	C	0.469755	0.0696135	0.0156968	8243	9.21239e-06	19.6658
Isobutyrylcarnitine (c4) levels	rs2938016	A	G	0.14177	-0.100863	0.0220059	8243	4.57318e-06	21.0055
Isobutyrylcarnitine (c4) levels	rs76370801	T	A	0.0750183	0.137578	0.0291995	8243	2.45692e-06	22.197
Isobutyrylcarnitine (c4) levels	rs1171616	T	G	0.769799	0.143846	0.0186464	8243	1.21539e-14	59.5049
Isobutyrylcarnitine (c4) levels	rs10999904	A	G	0.0978539	-0.119035	0.0260573	8243	4.91885e-06	20.8659
Isobutyrylcarnitine (c4) levels	rs4076181	T	C	0.249242	0.0865338	0.0181584	8243	1.88381e-06	22.7072
Isobutyrylcarnitine (c4) levels	rs7111570	T	C	0.0276081	0.775156	0.0463532	8243	8.94066e-63	279.619
Isobutyrylcarnitine (c4) levels	rs17419942	T	C	0.045358	-0.174599	0.0372747	8243	2.81177e-06	21.9383
Isobutyrylcarnitine (c4) levels	rs9600076	C	A	0.0309483	0.199831	0.0448813	8243	8.49043e-06	19.8218
Isobutyrylcarnitine (c4) levels	rs137953078	C	T	0.0103175	0.356478	0.0762052	8243	2.89864e-06	21.8798
Isobutyrylcarnitine (c4) levels	rs118057342	A	G	0.00889593	-0.406794	0.0823501	8243	7.81961e-07	24.3988
Isobutyrylcarnitine (c4) levels	rs79495512	C	T	0.0877236	0.139457	0.0271292	8243	2.74045e-07	26.4213
Isobutyrylcarnitine (c4) levels	rs138449764	G	T	0.0162918	0.282029	0.061021	8243	3.80354e-06	21.3588
Isobutyrylcarnitine (c4) levels	rs58452291	A	G	0.283074	-0.0810424	0.017104	8243	2.1561e-06	22.4479
Isobutyrylcarnitine (c4) levels	rs191504380	T	C	0.00139733	-0.940072	0.205959	8243	5.00986e-06	20.8309
Isobutyrylcarnitine (c4) levels	rs4350602	T	C	0.7305	0.101579	0.0173281	8243	4.57168e-09	34.36
3-methylxanthine levels	rs79149266	T	A	0.0126441	0.325032	0.0696894	8085	3.10111e-06	21.7503
3-methylxanthine levels	rs35757962	T	C	0.0213543	-0.239907	0.0535463	8085	7.45162e-06	20.0712
3-methylxanthine levels	rs112705243	A	G	0.00981976	0.376056	0.0783431	8085	1.58577e-06	23.0383
[truncated: 31,664 more rows]

## Sheet: Table S4.
Table S4. Causal associations between circulating immune cells and coronary atherosclerosis by using different method.
[truncated: 37 more rows]

[truncated: 11 more sheets: Table S5., Table S6., Table S7., Table S8. , Table S9. , Table S10. , Table S11., Table S12., TableS13., TableS14., TableS15.]
